# Supplementary material
Source: PubMed Central journal article supplement (PMC2729128)

**Supplementary Figure 2 | Most tissue-specific differential DNA methylation is located at CpG island shores.** The top 50 T-DMRs, ordered by statistical significance. Displays are as in Fig. 1a. The upper panels are plots of  $M$  value versus genomic location for brain (grey), liver (pink), and spleen (purple). Each point represents the methylation level of an individual sample for a given probe. The curve represents averaged smoothed  $M$  values, described in detail in the Methods. Due to the scale and standardization used,  $M$  values which range from  $-0.5$  to  $0.5$  represent unmethylated sites as defined by the control probes, and values from  $0.5$  to  $1.5$  represent baseline levels of methylation. The middle panels provide the location of CpG dinucleotides with black tick marks on the x-axis. CpG density was calculated across the region using a standard density estimator and is represented by the smoothed black line. The location of the CpG island is denoted on the x-axis as an orange line. The lower panels provide gene annotation for the genomic region. The thin outer grey line represents the transcript, the thin inner lines represent a coding region. Filled in grey boxes represent exons. On the y-axis, plus and minus marks denote sense and antisense gene transcription respectively.

ID:1--chr1:143786173-143787553

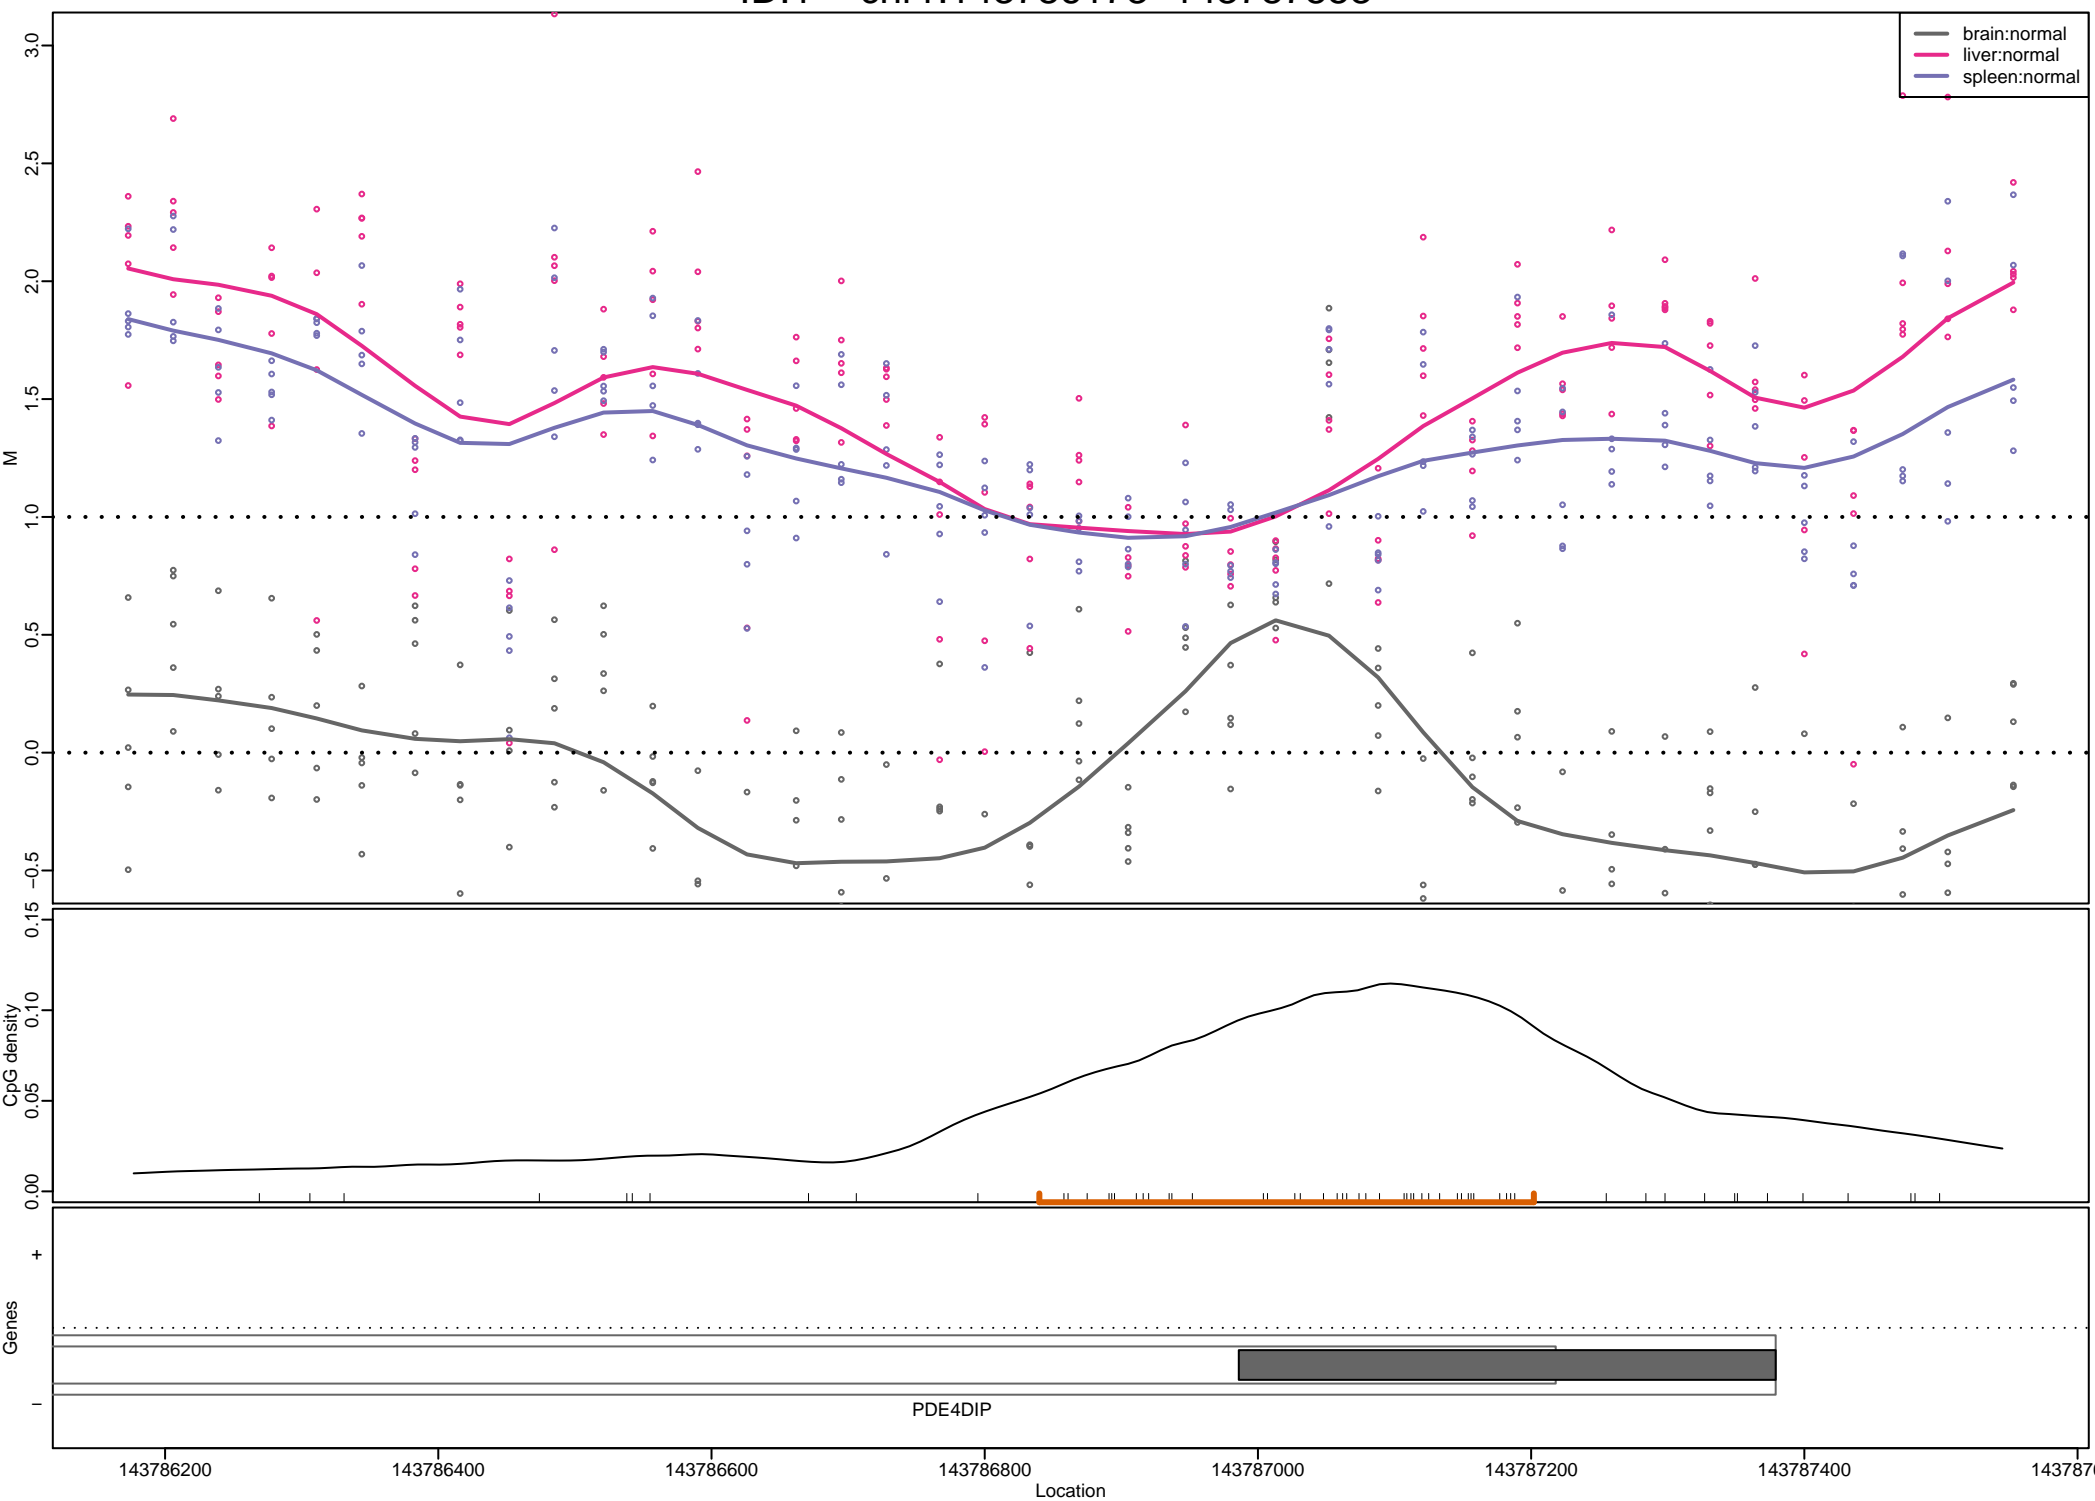

ID:2--chr1:8007593-8011063

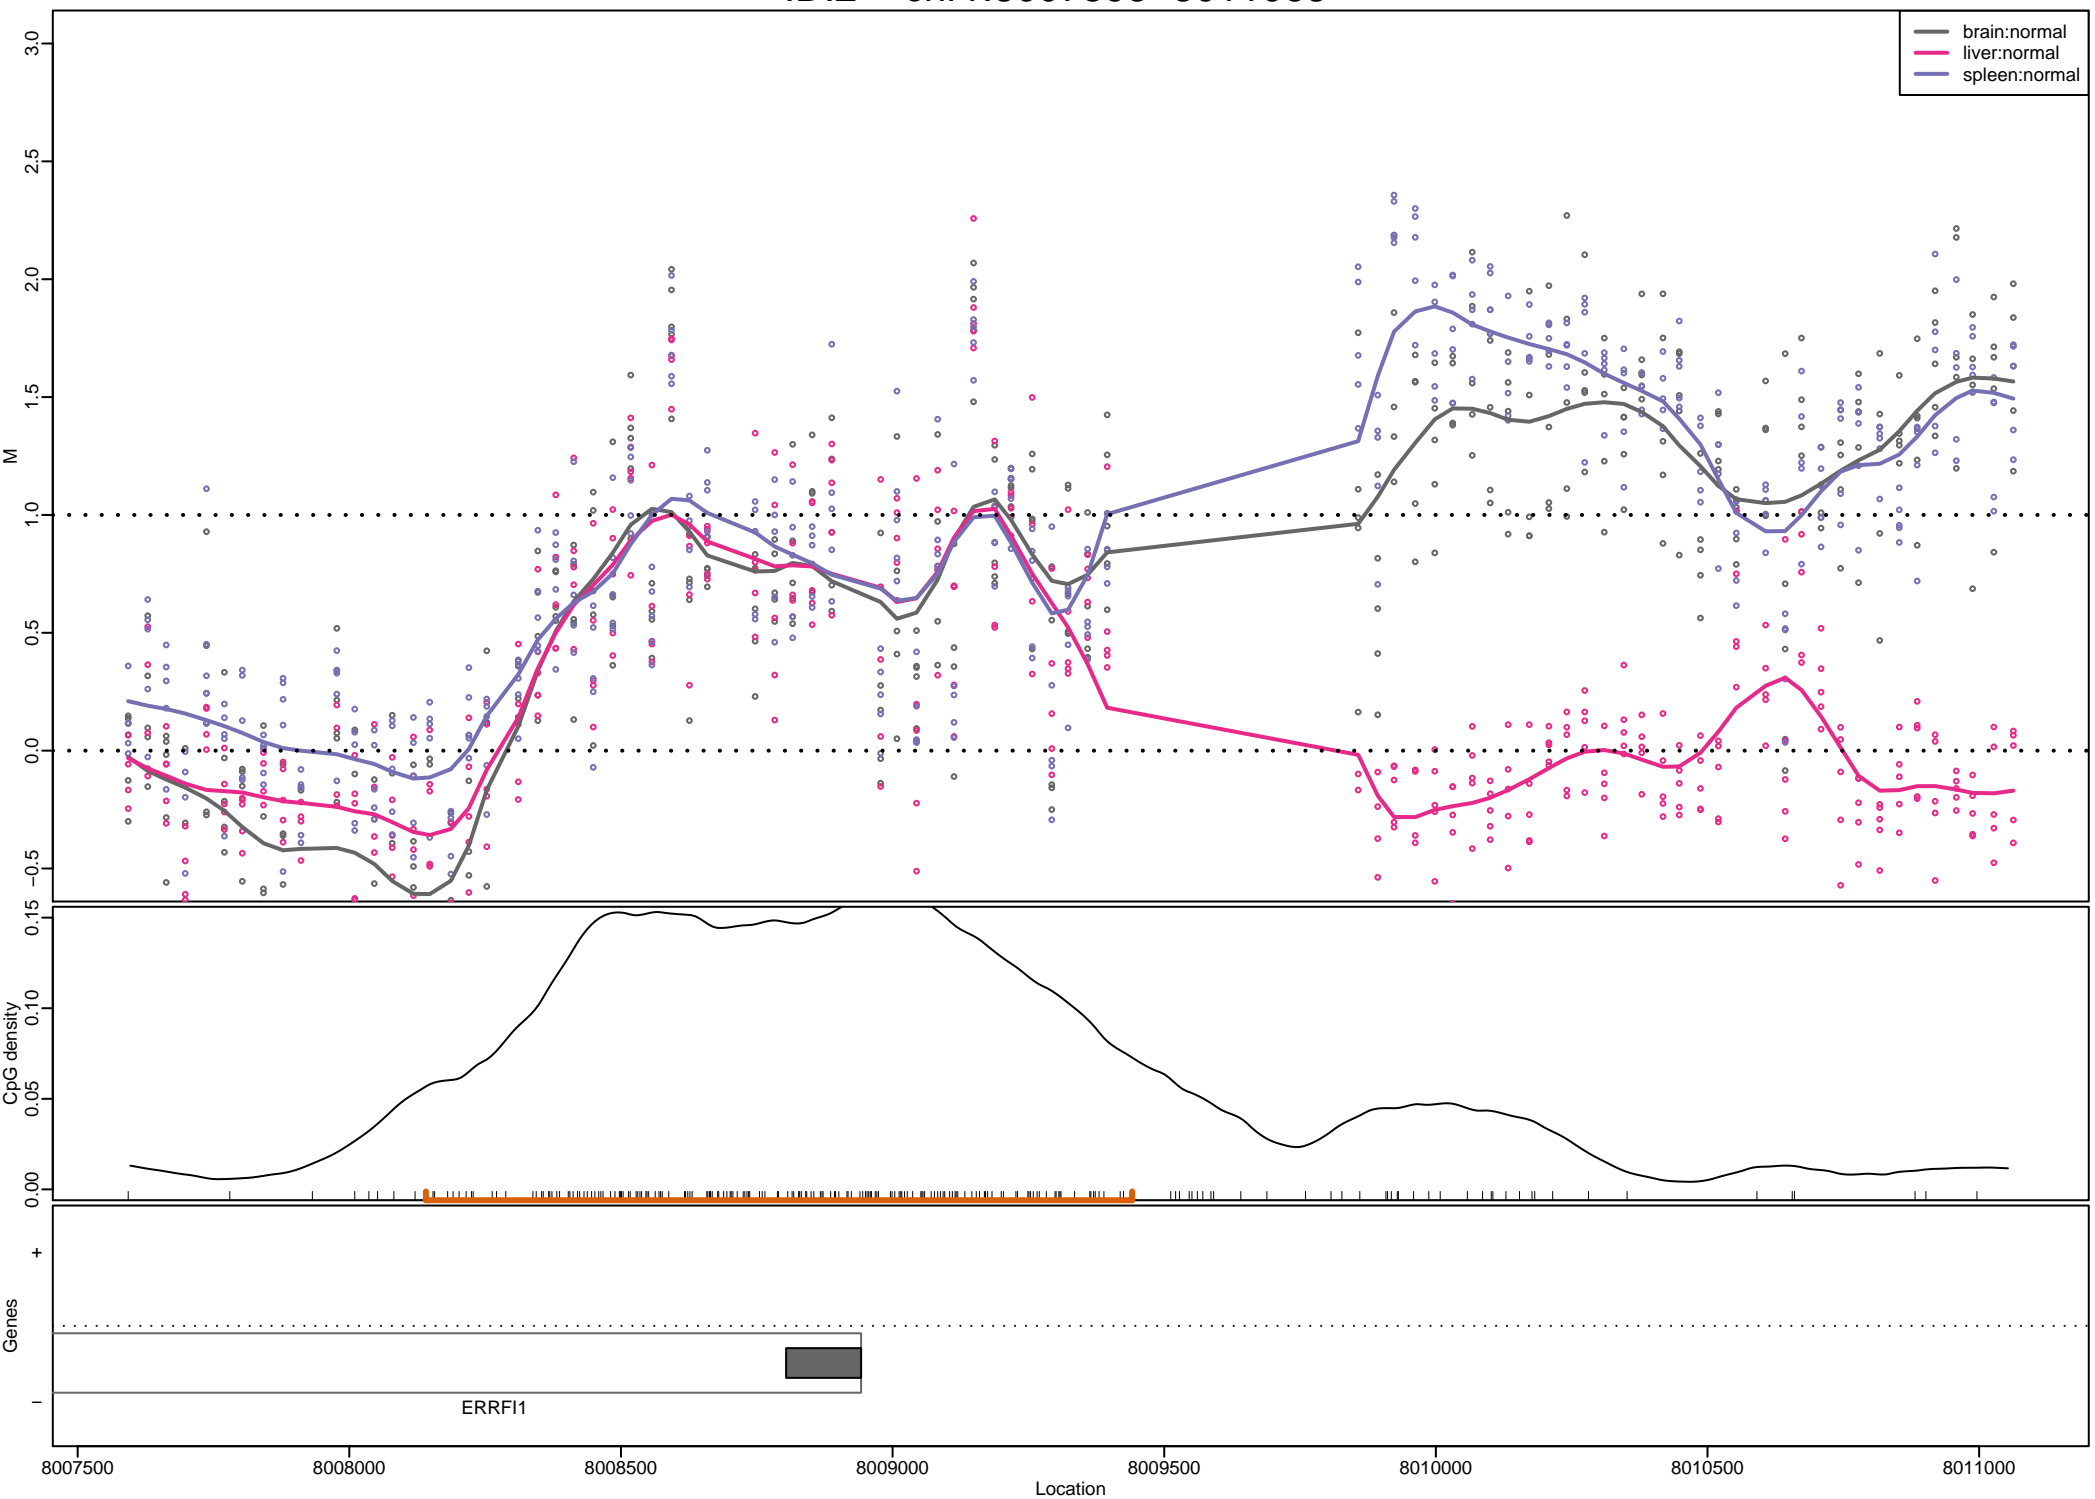

ID:3--chr10:101831054-101831822

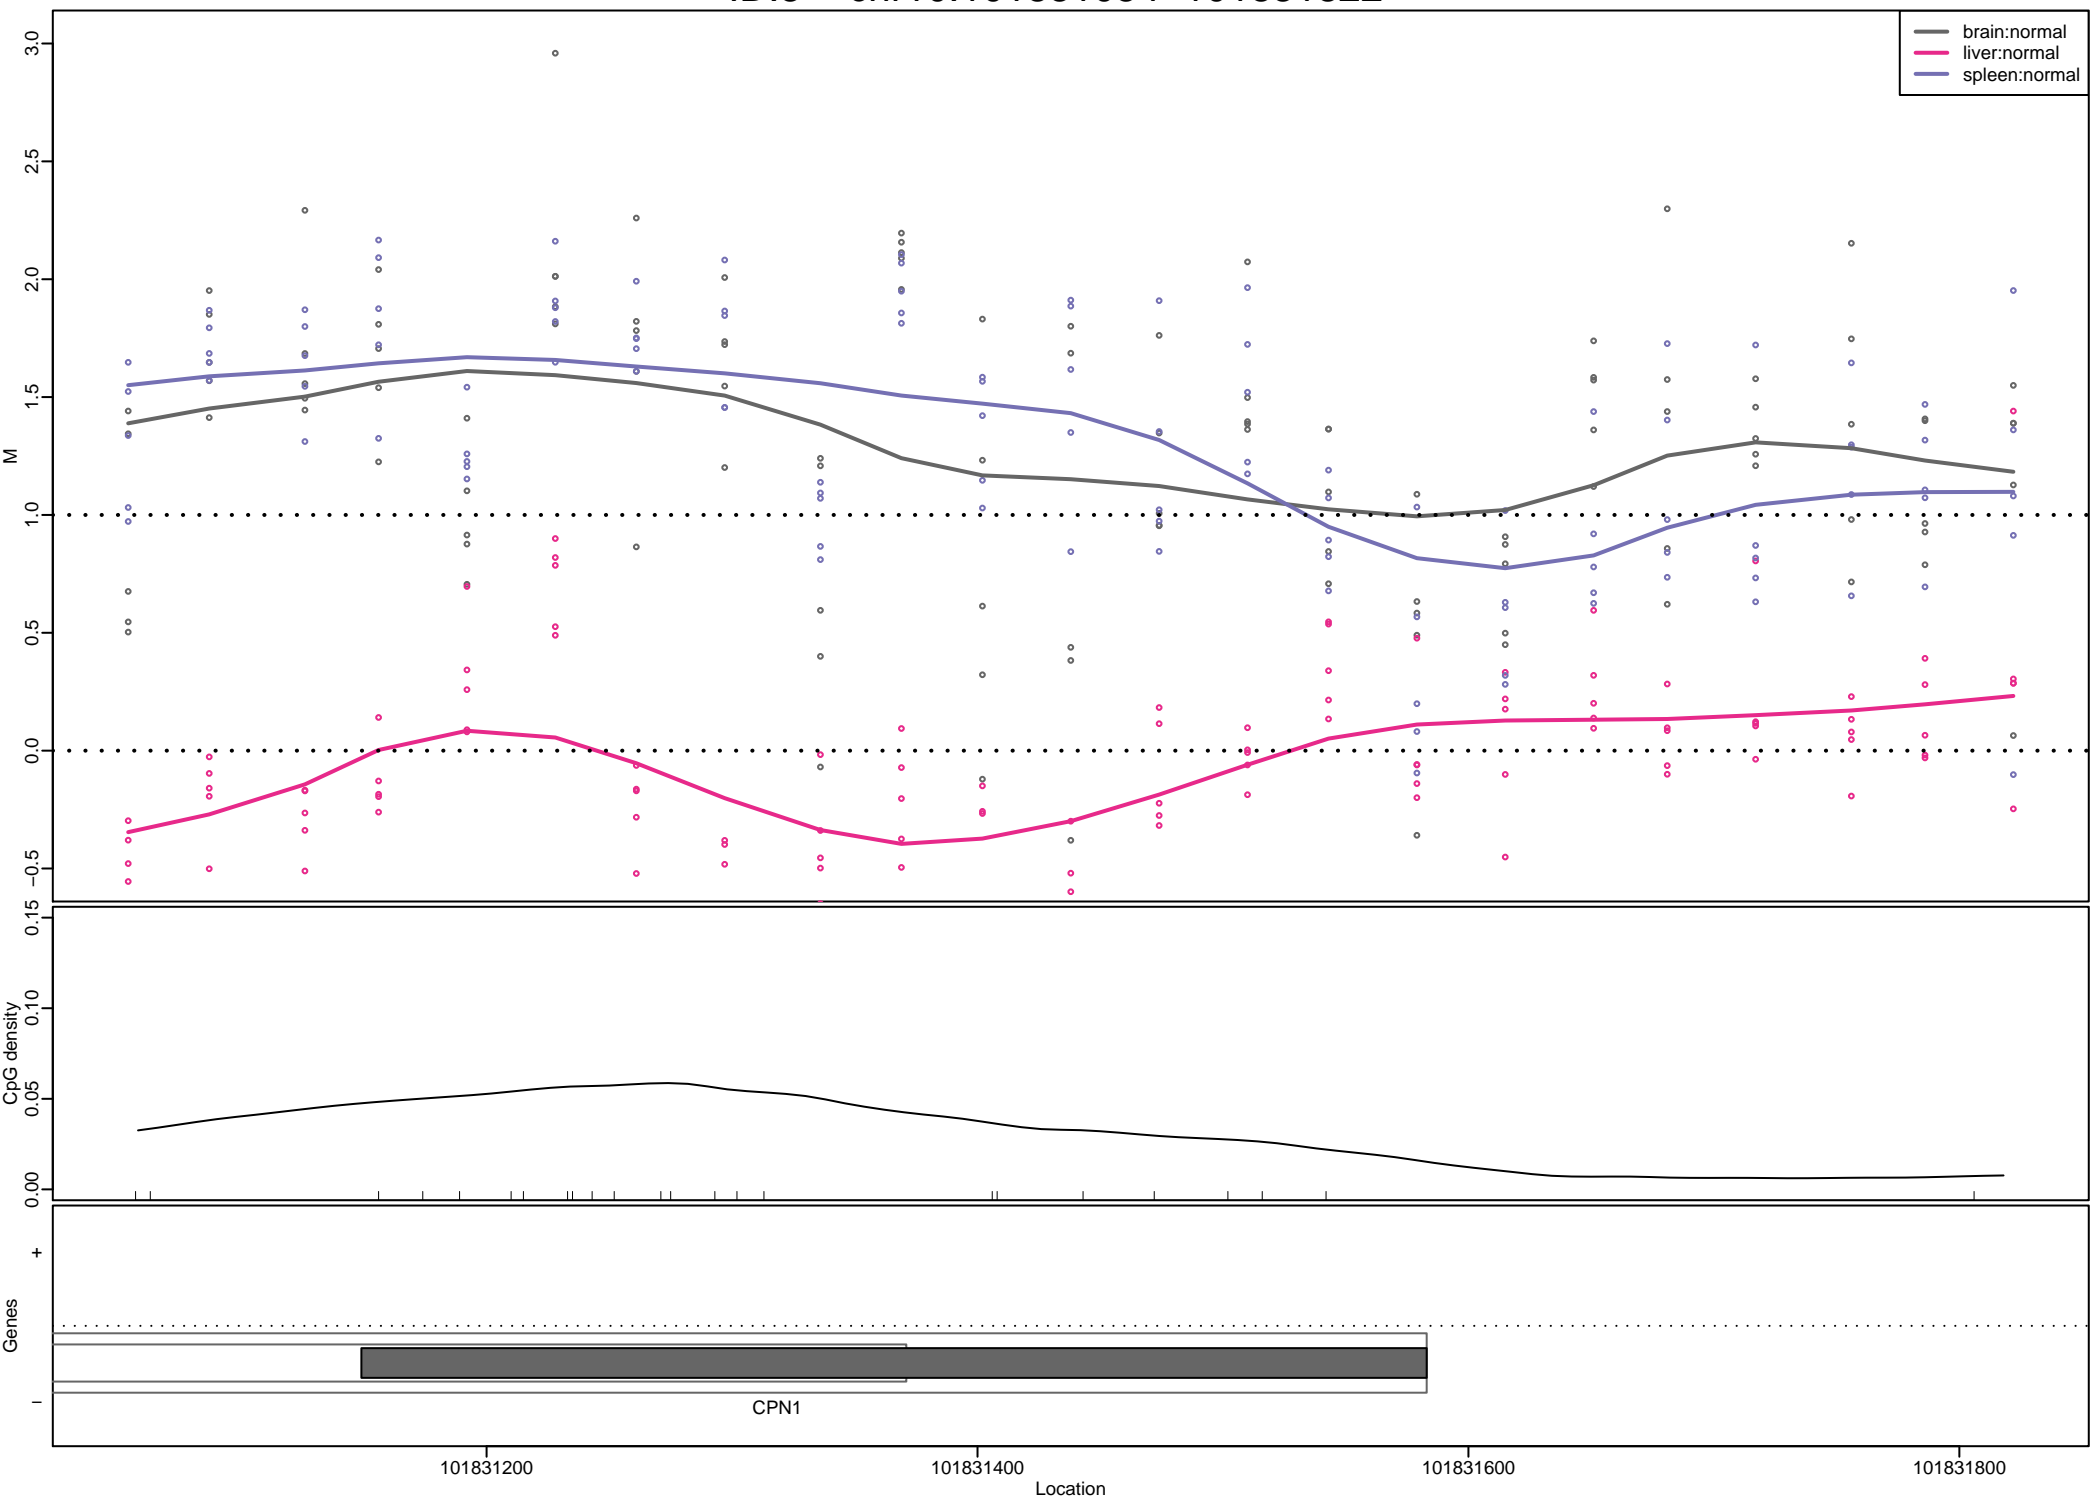

ID:4--chr12:131466159-131475023

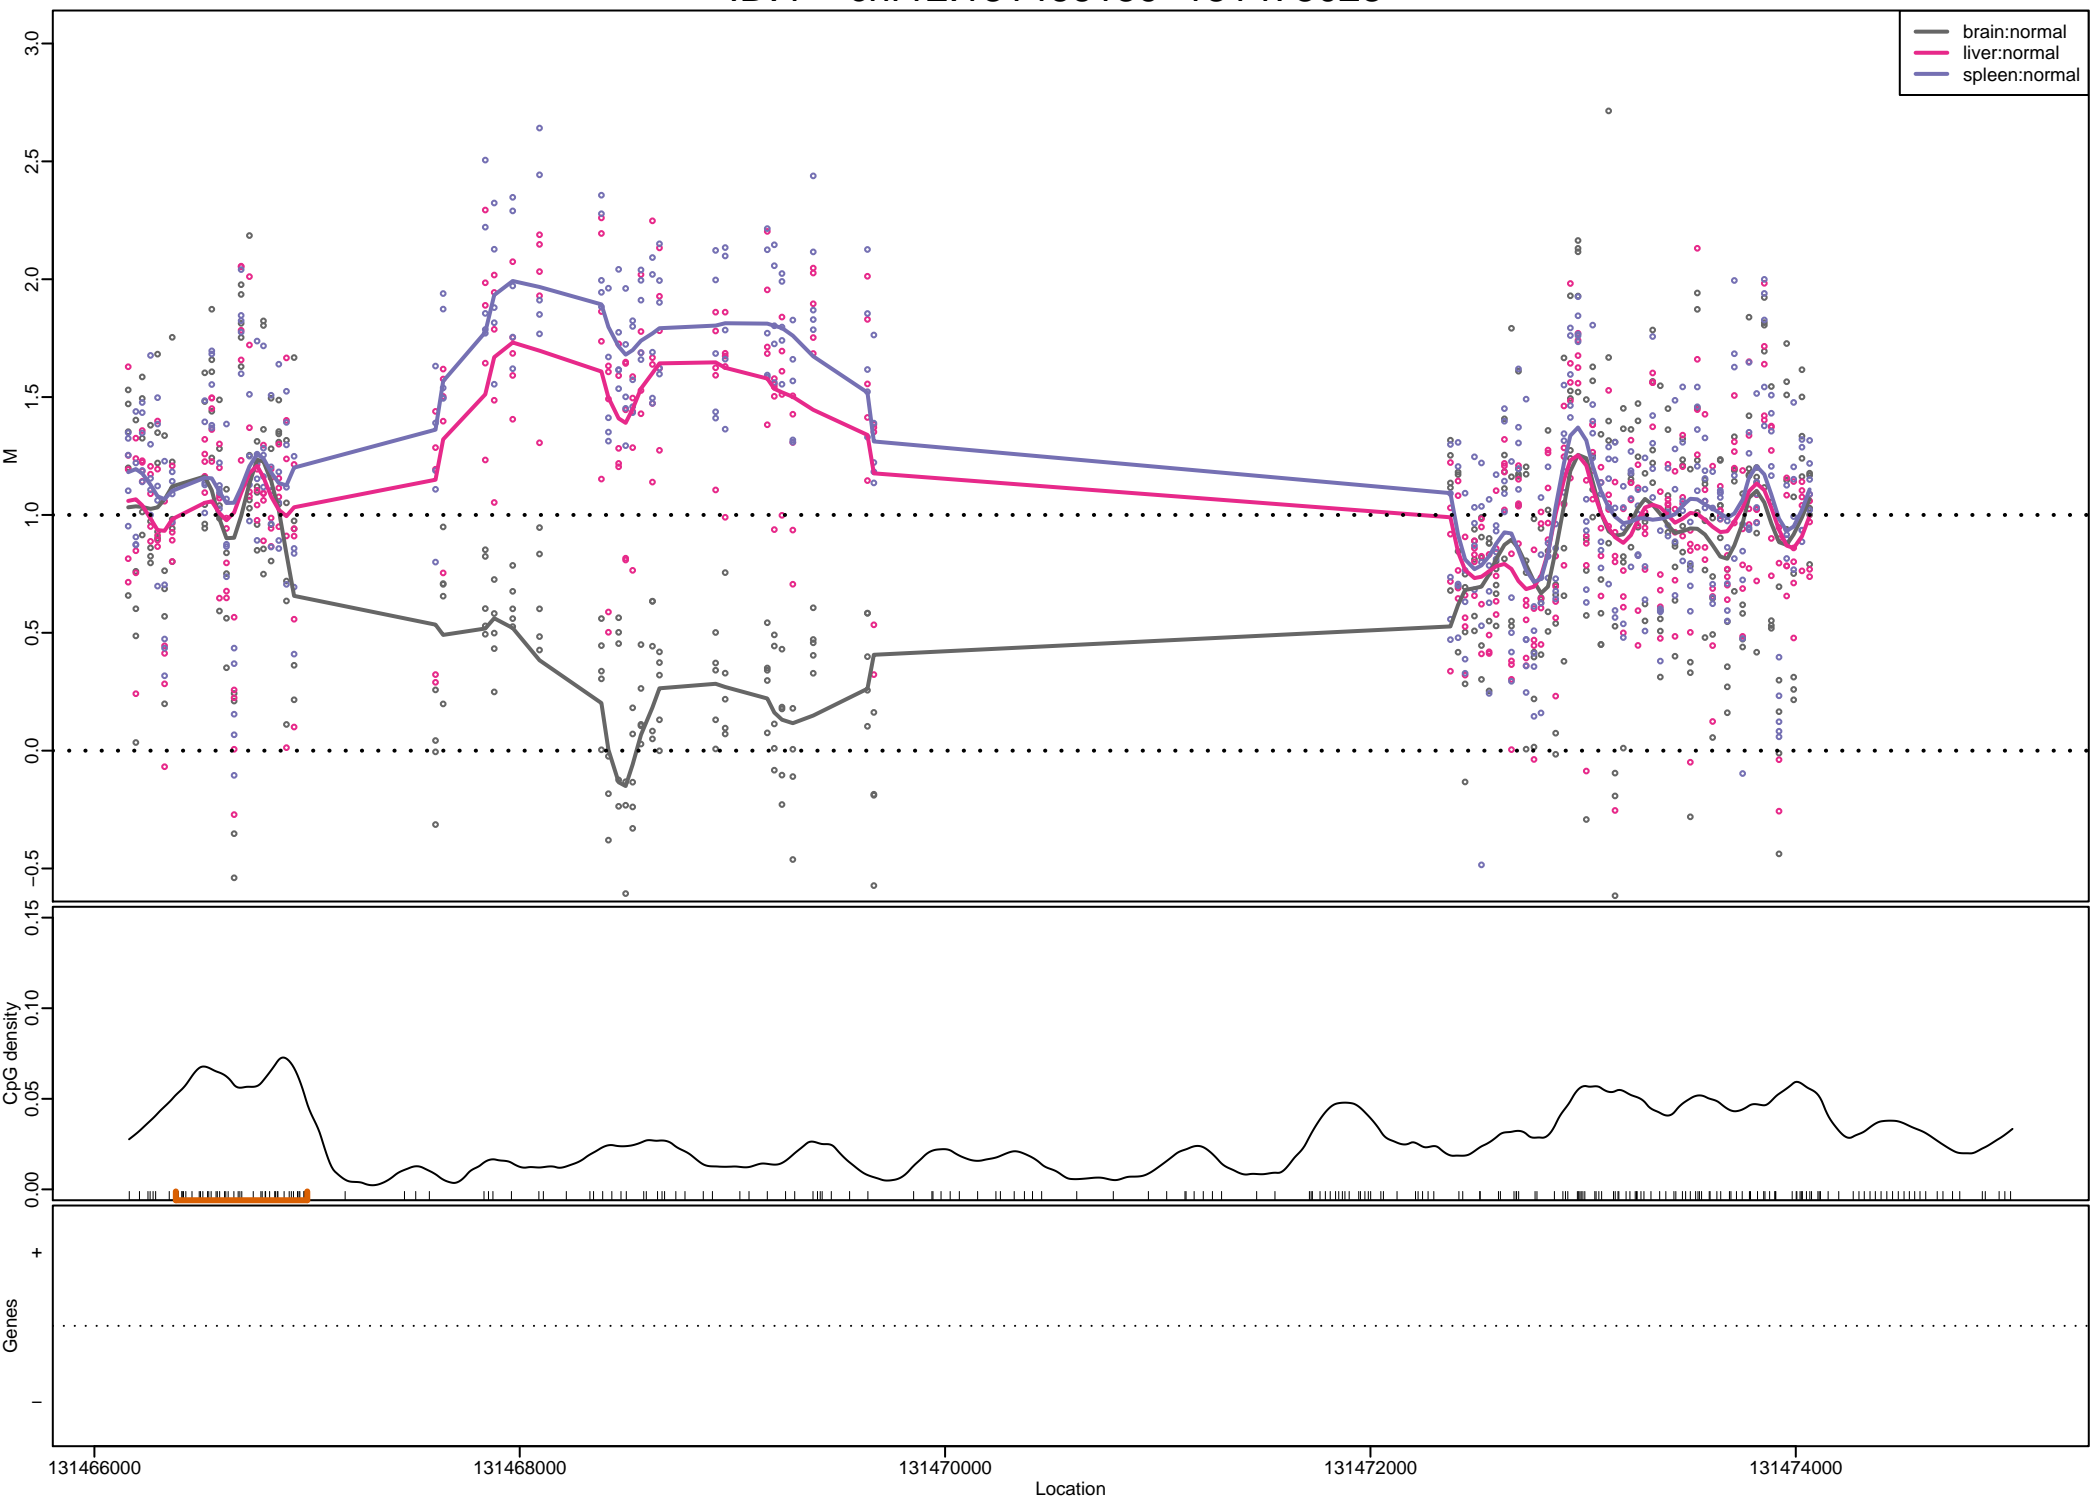

ID:5--chr12:6529487-6535487

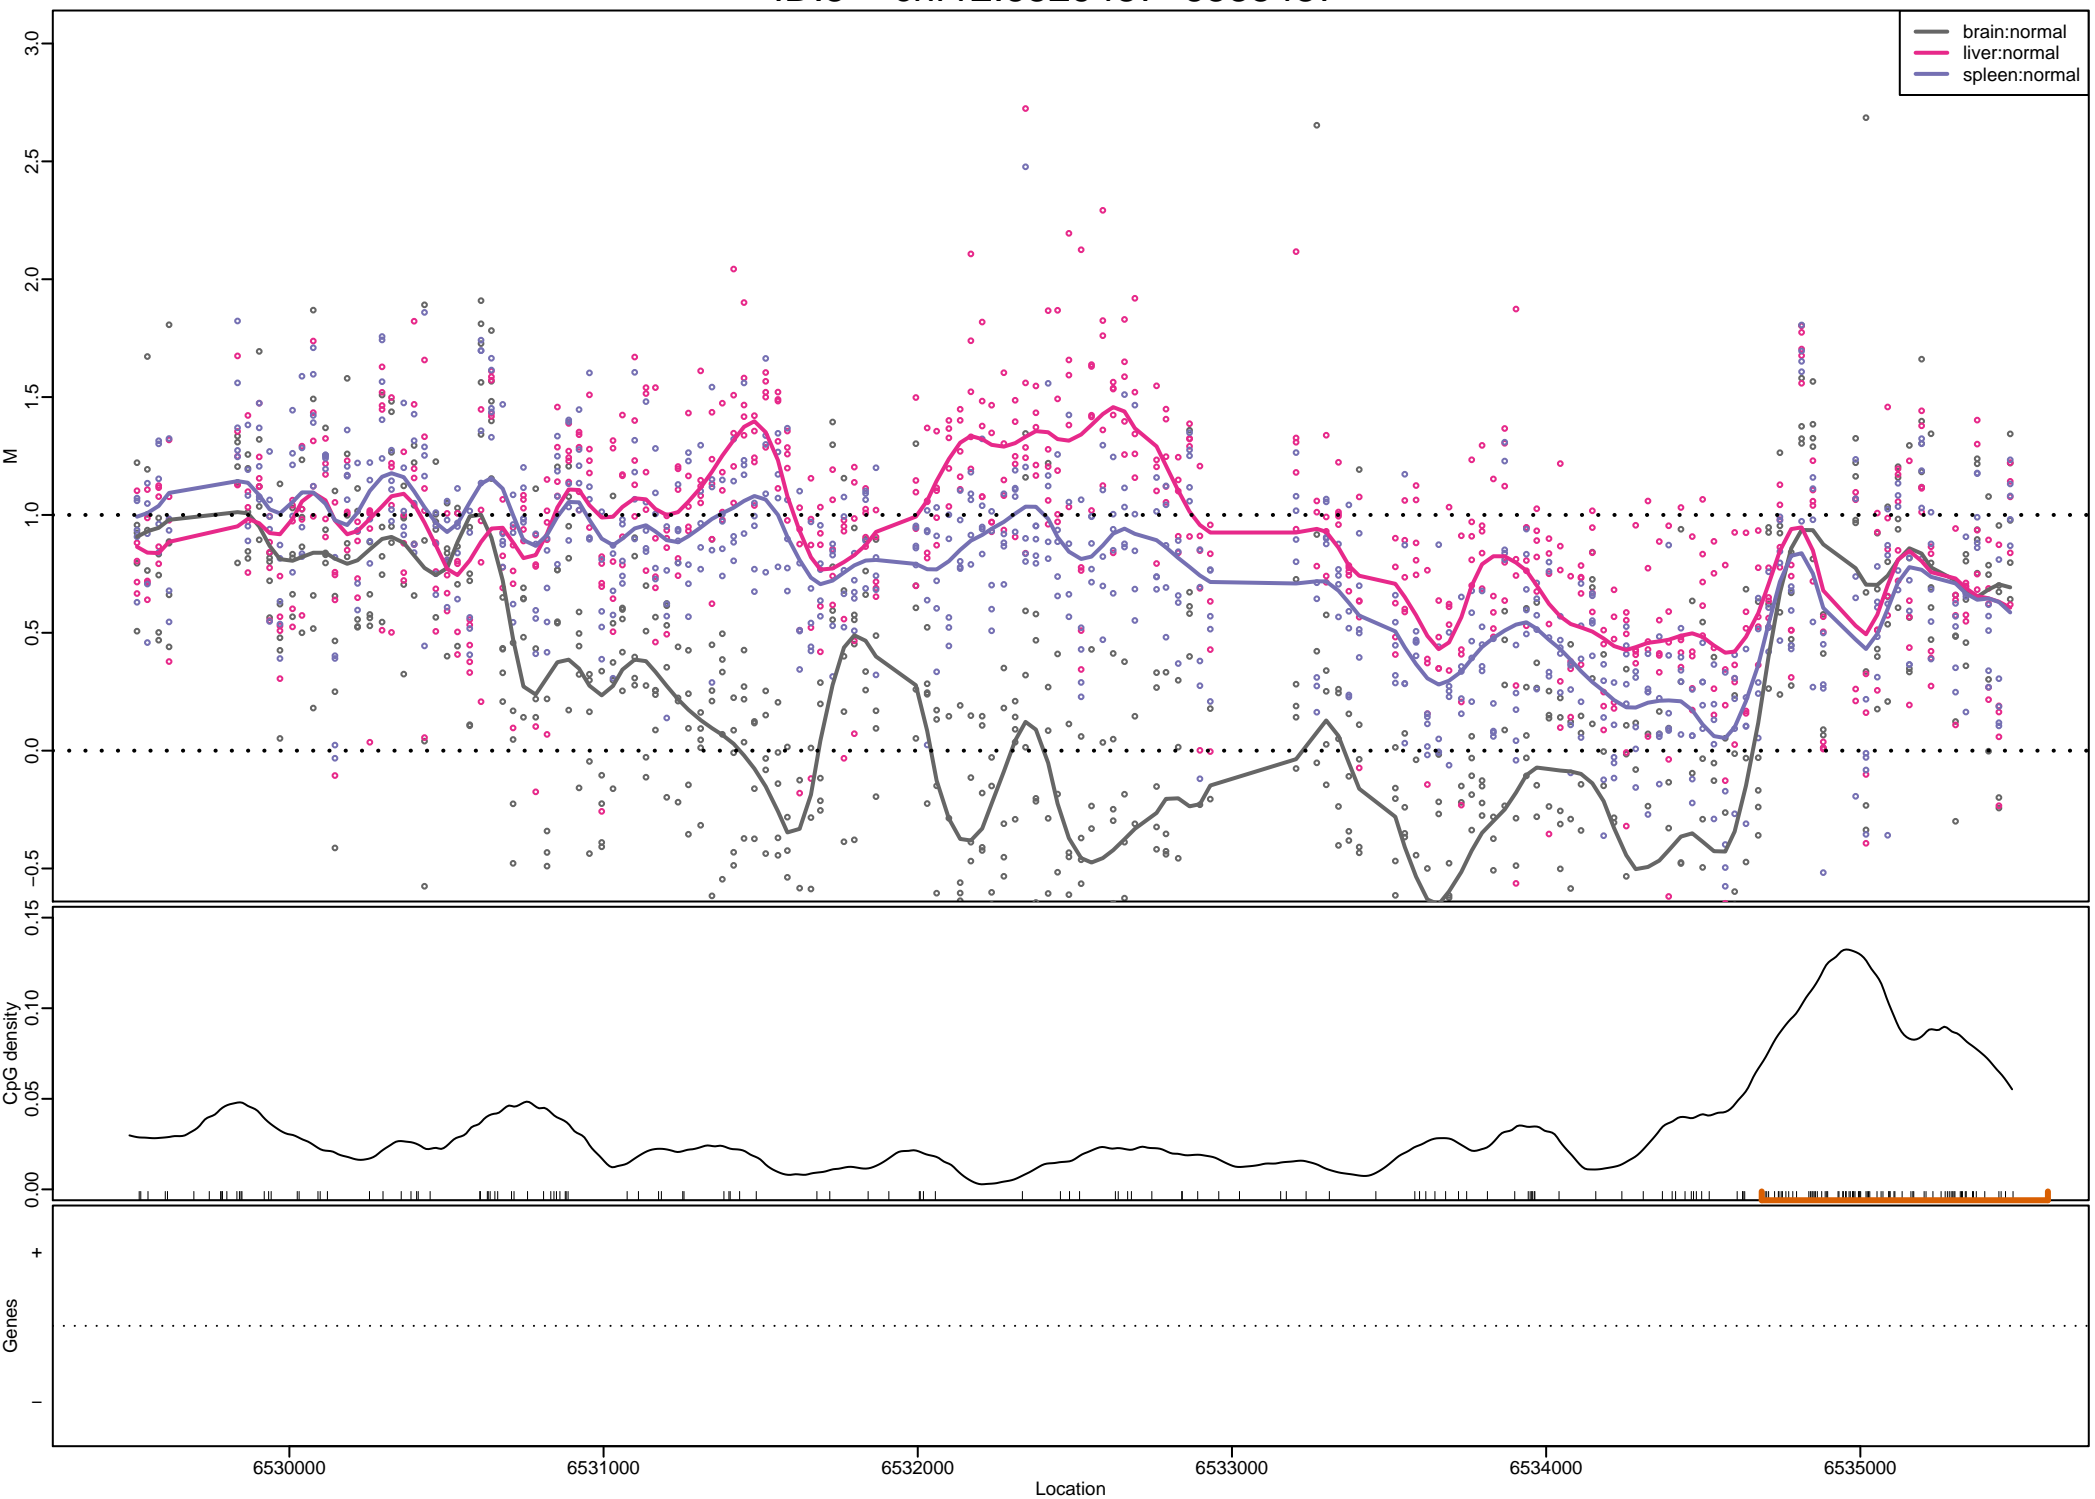

ID:6--chr14:23089148-23091283

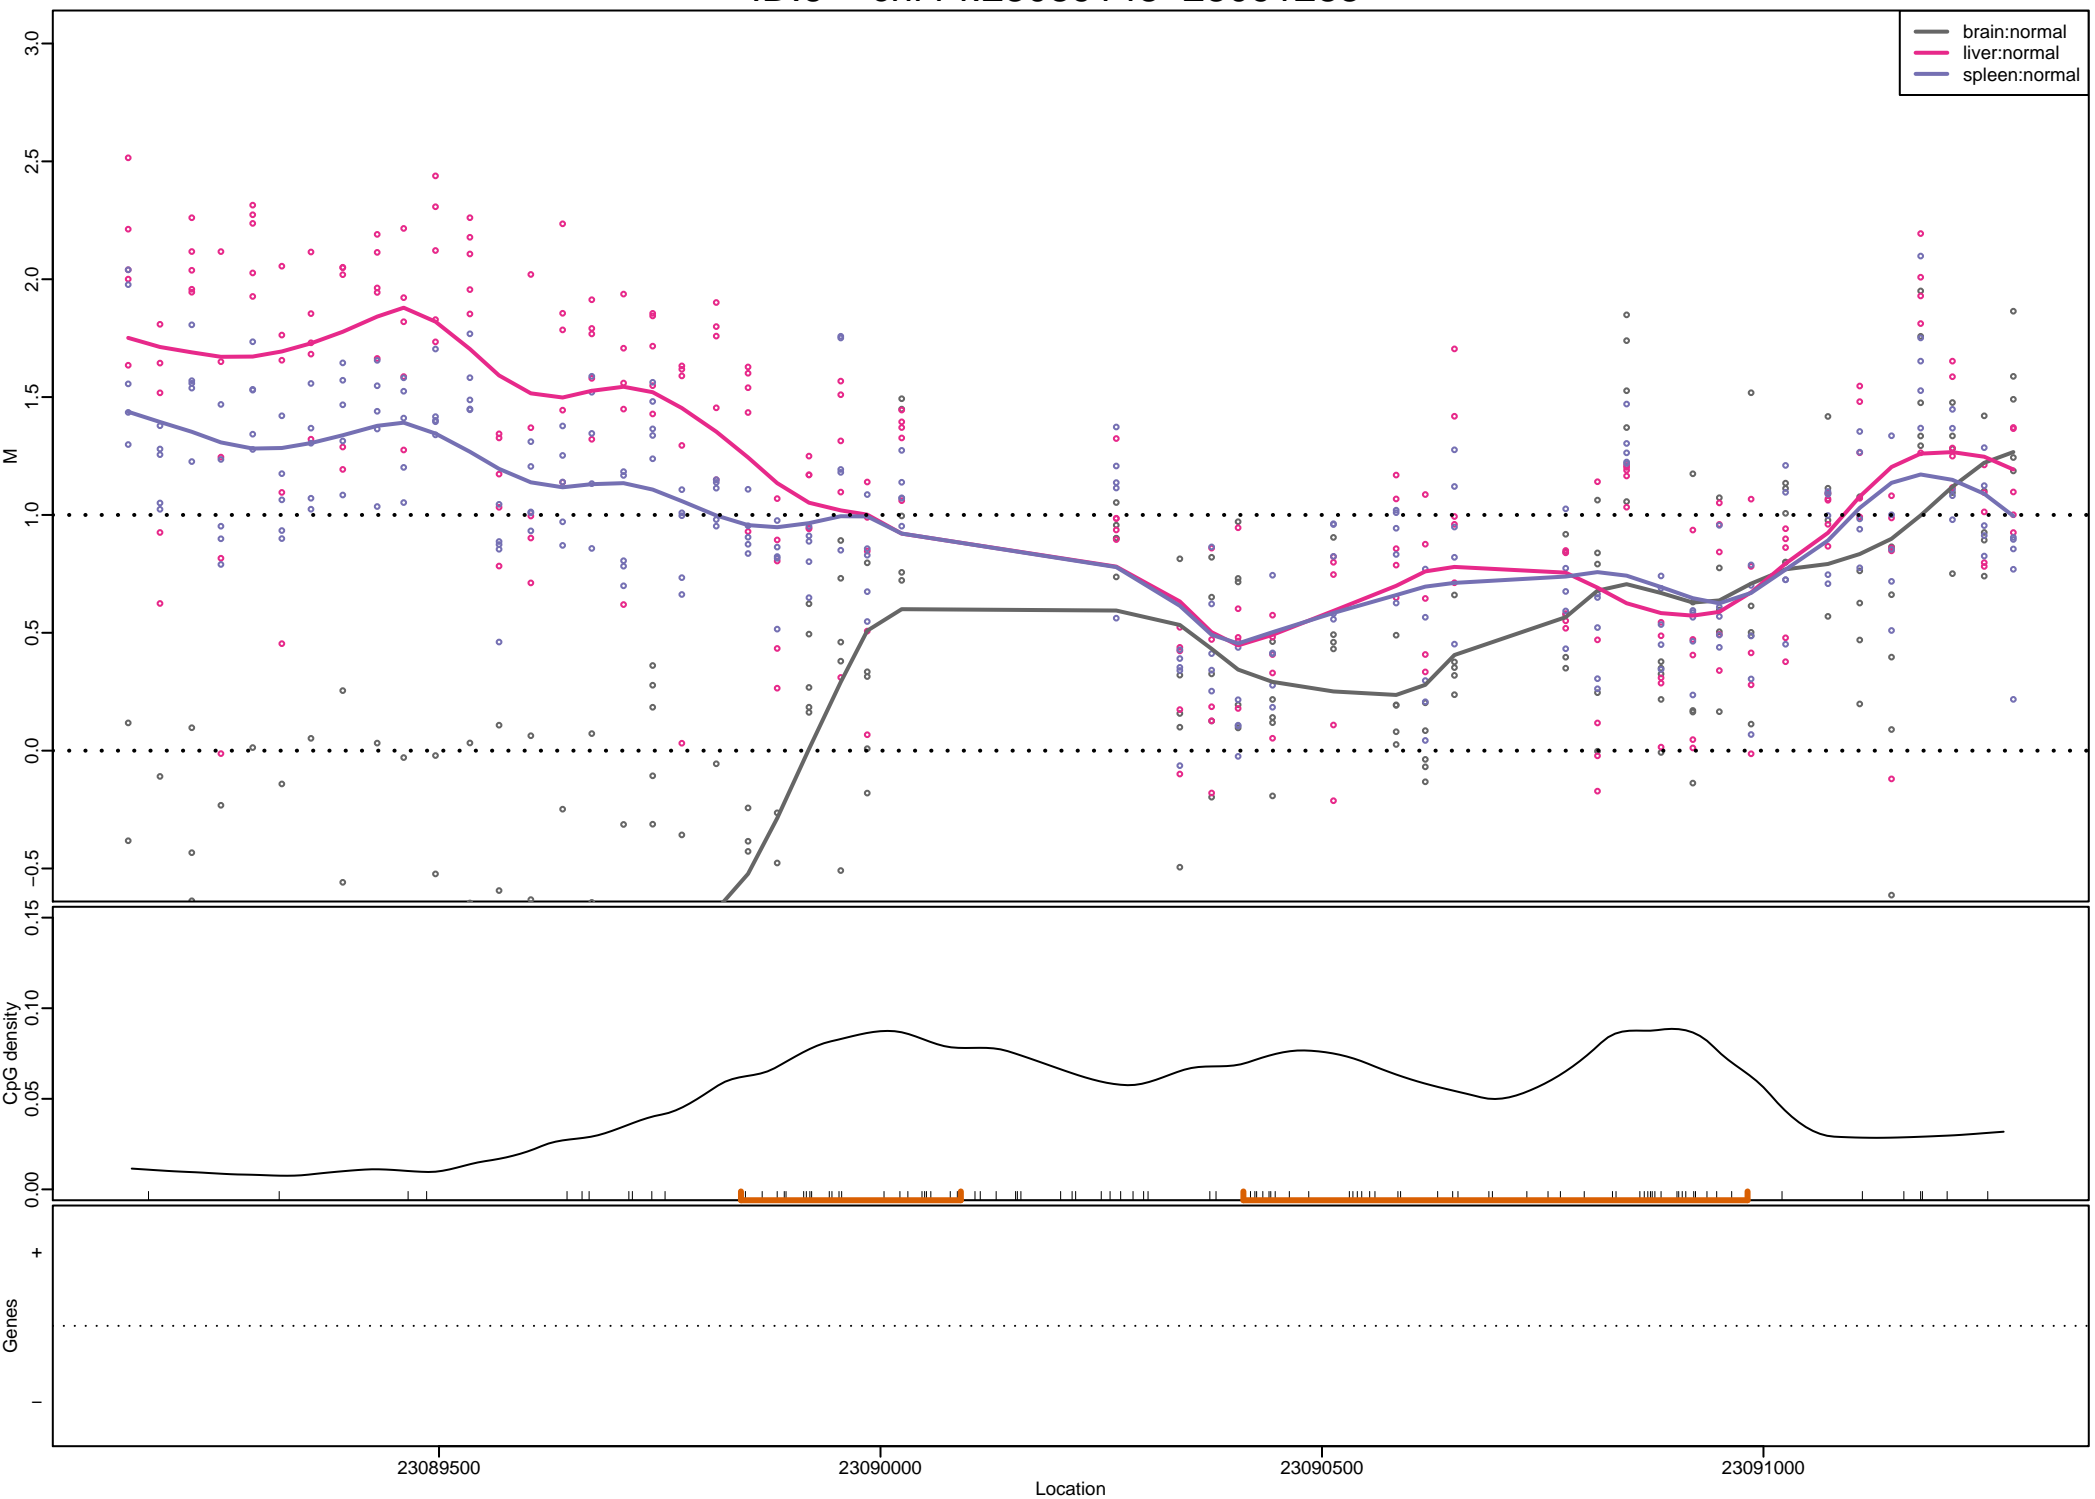

ID:7--chr14:50629706-50632817

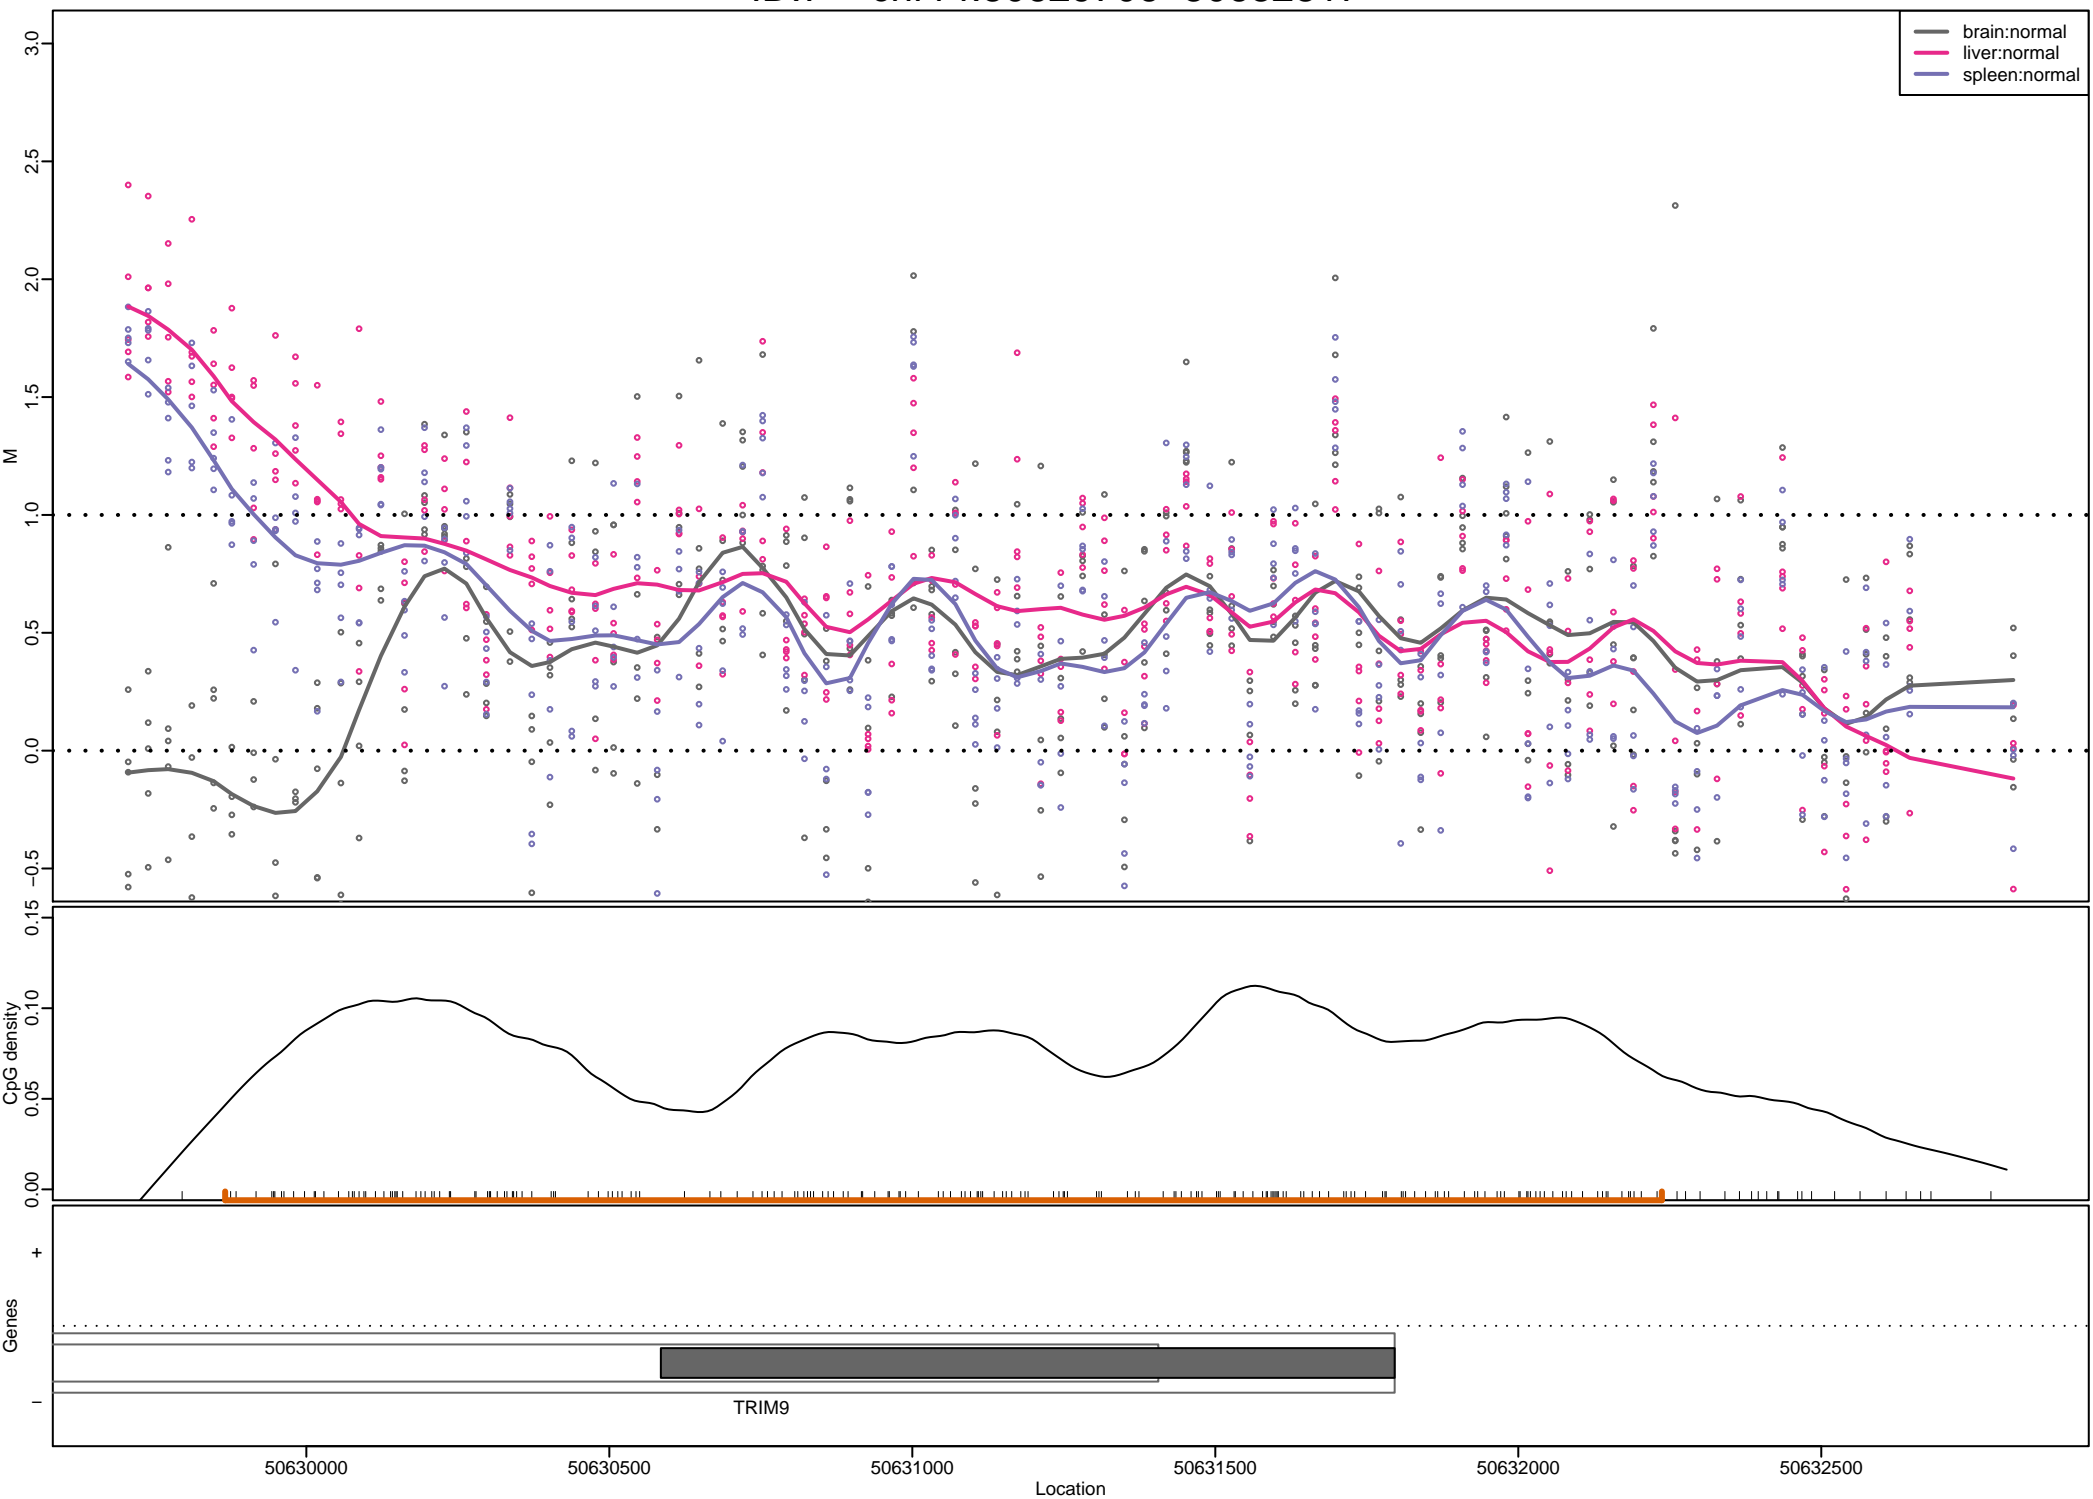

# ID:8--chr14:59165574-59167809

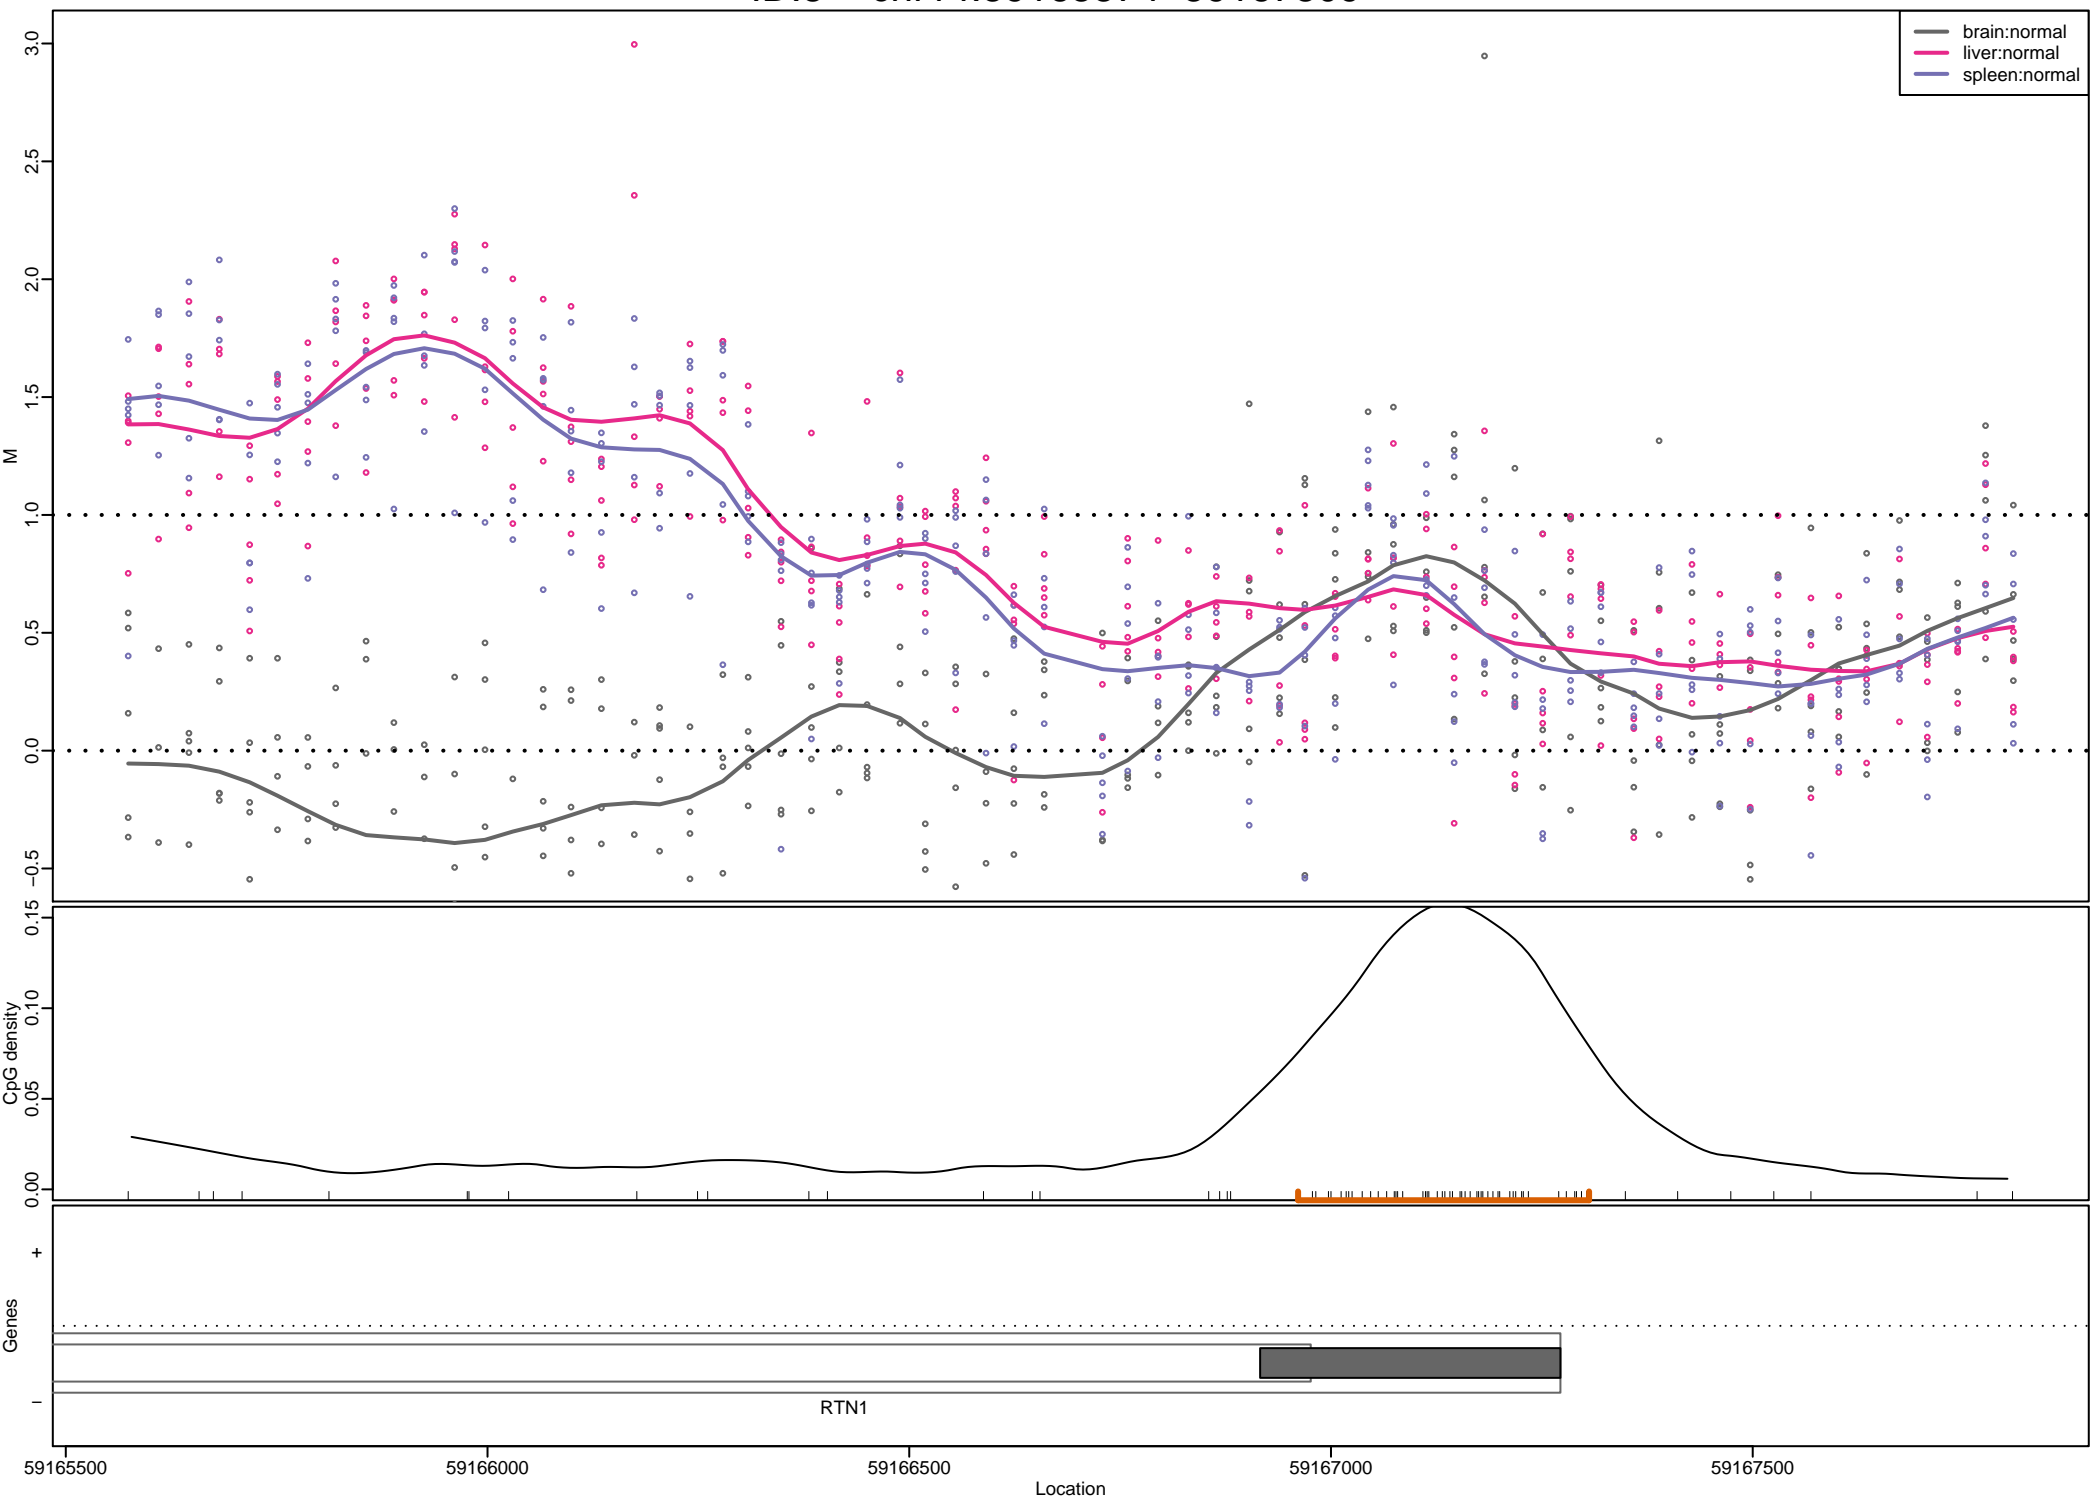

# ID:9--chr15:75709049-75712588

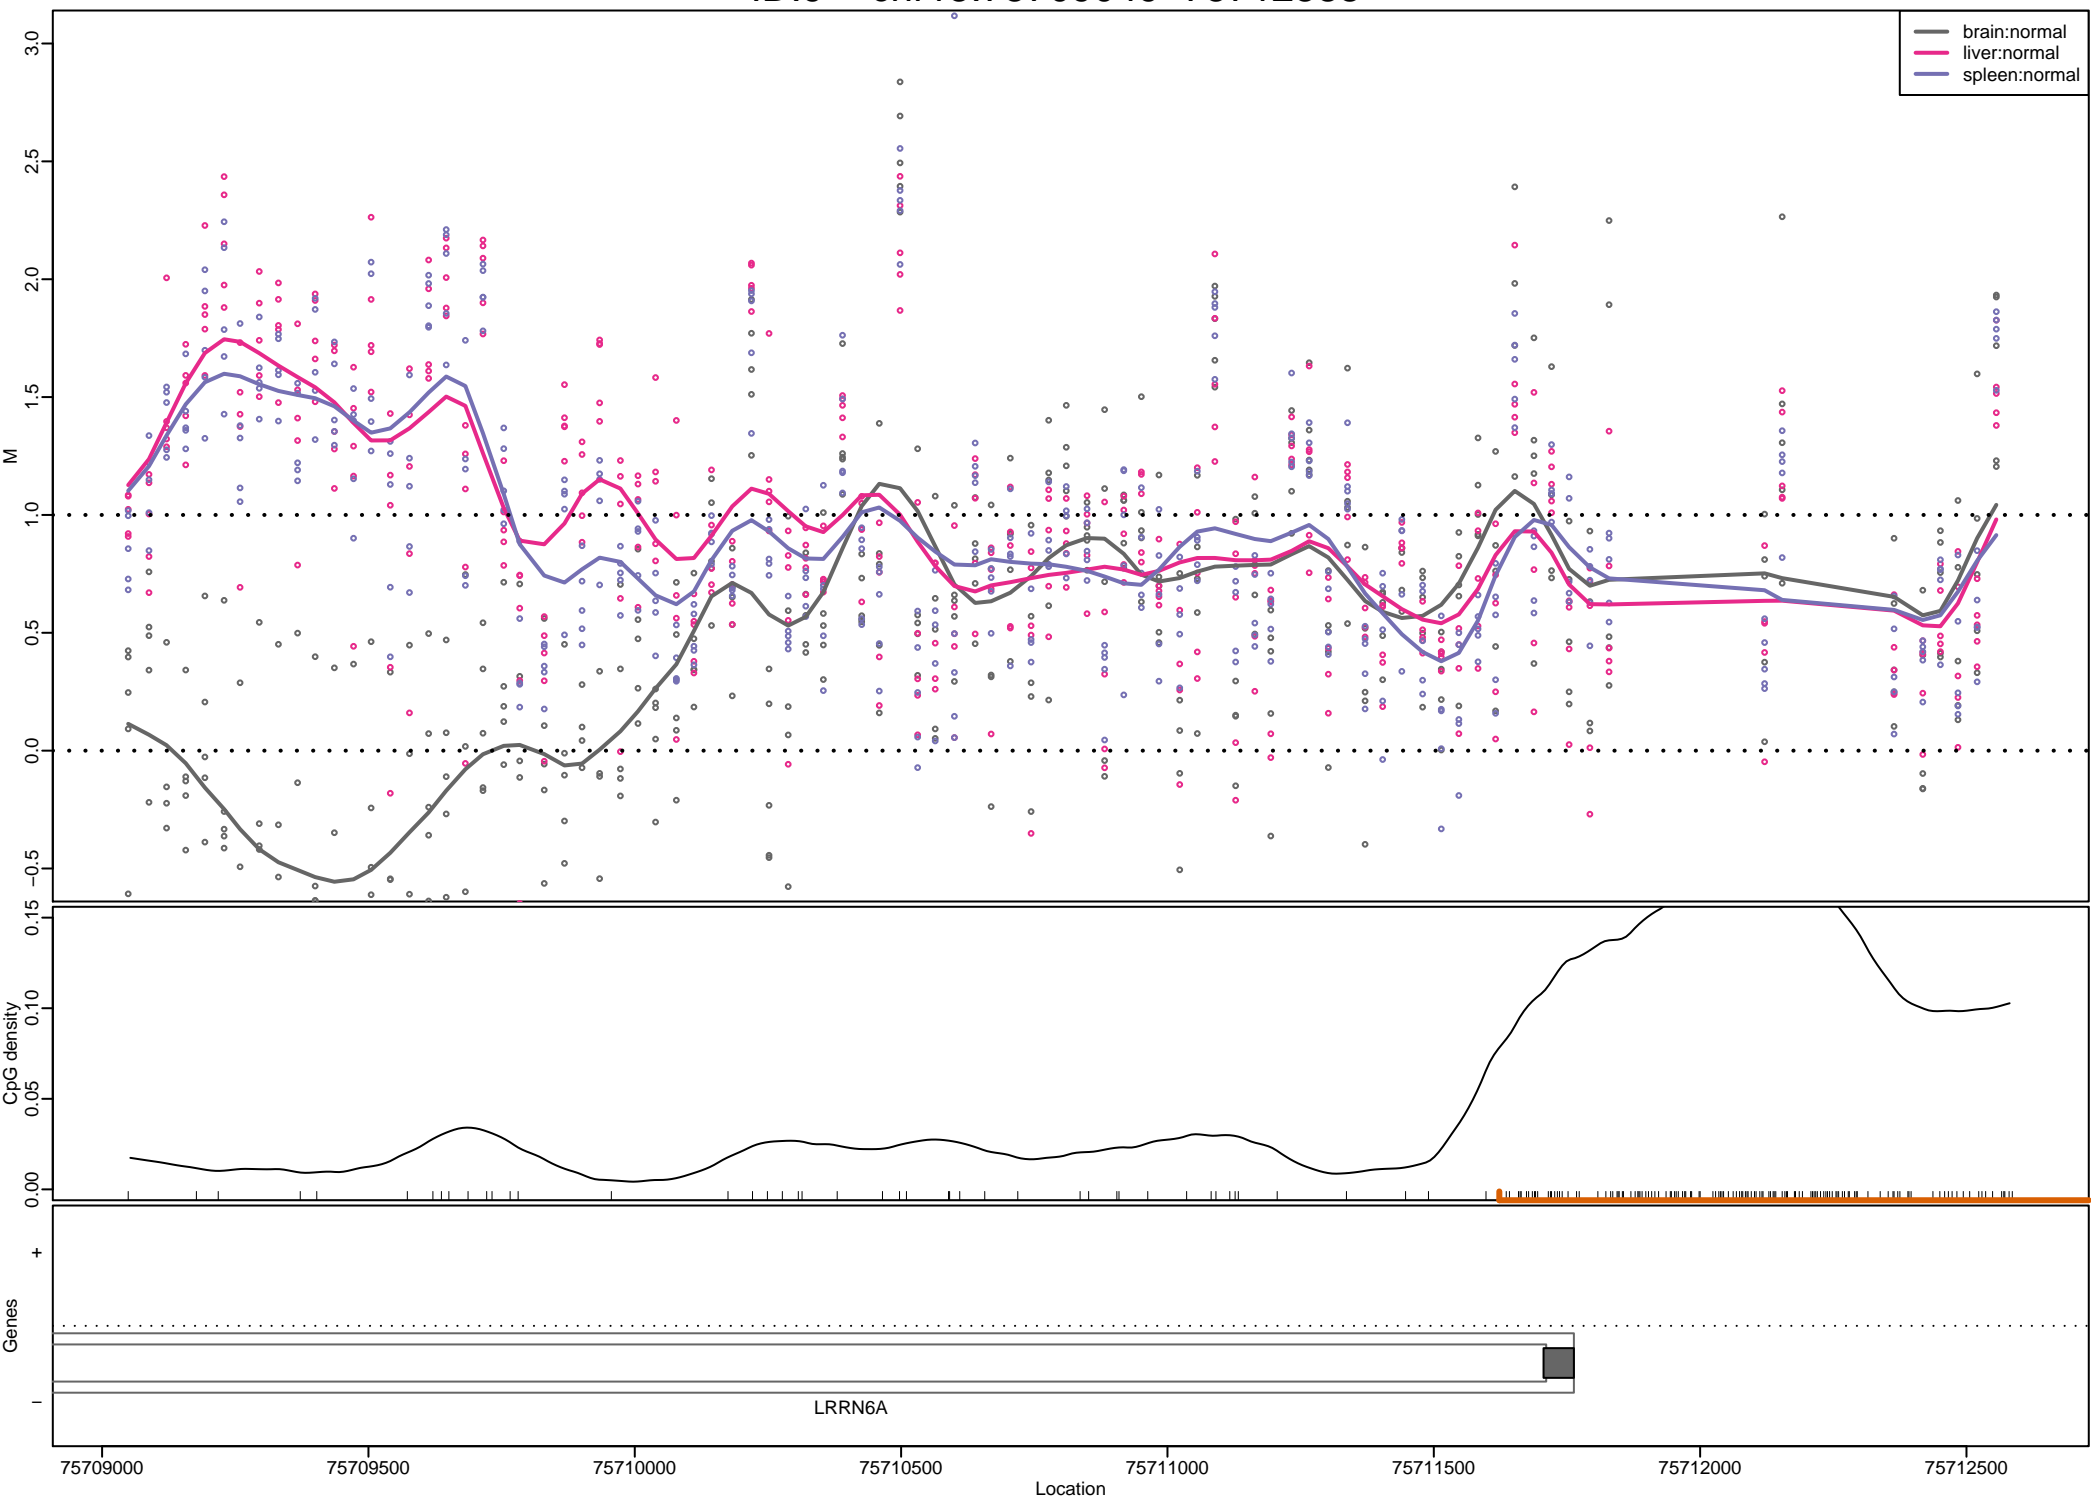

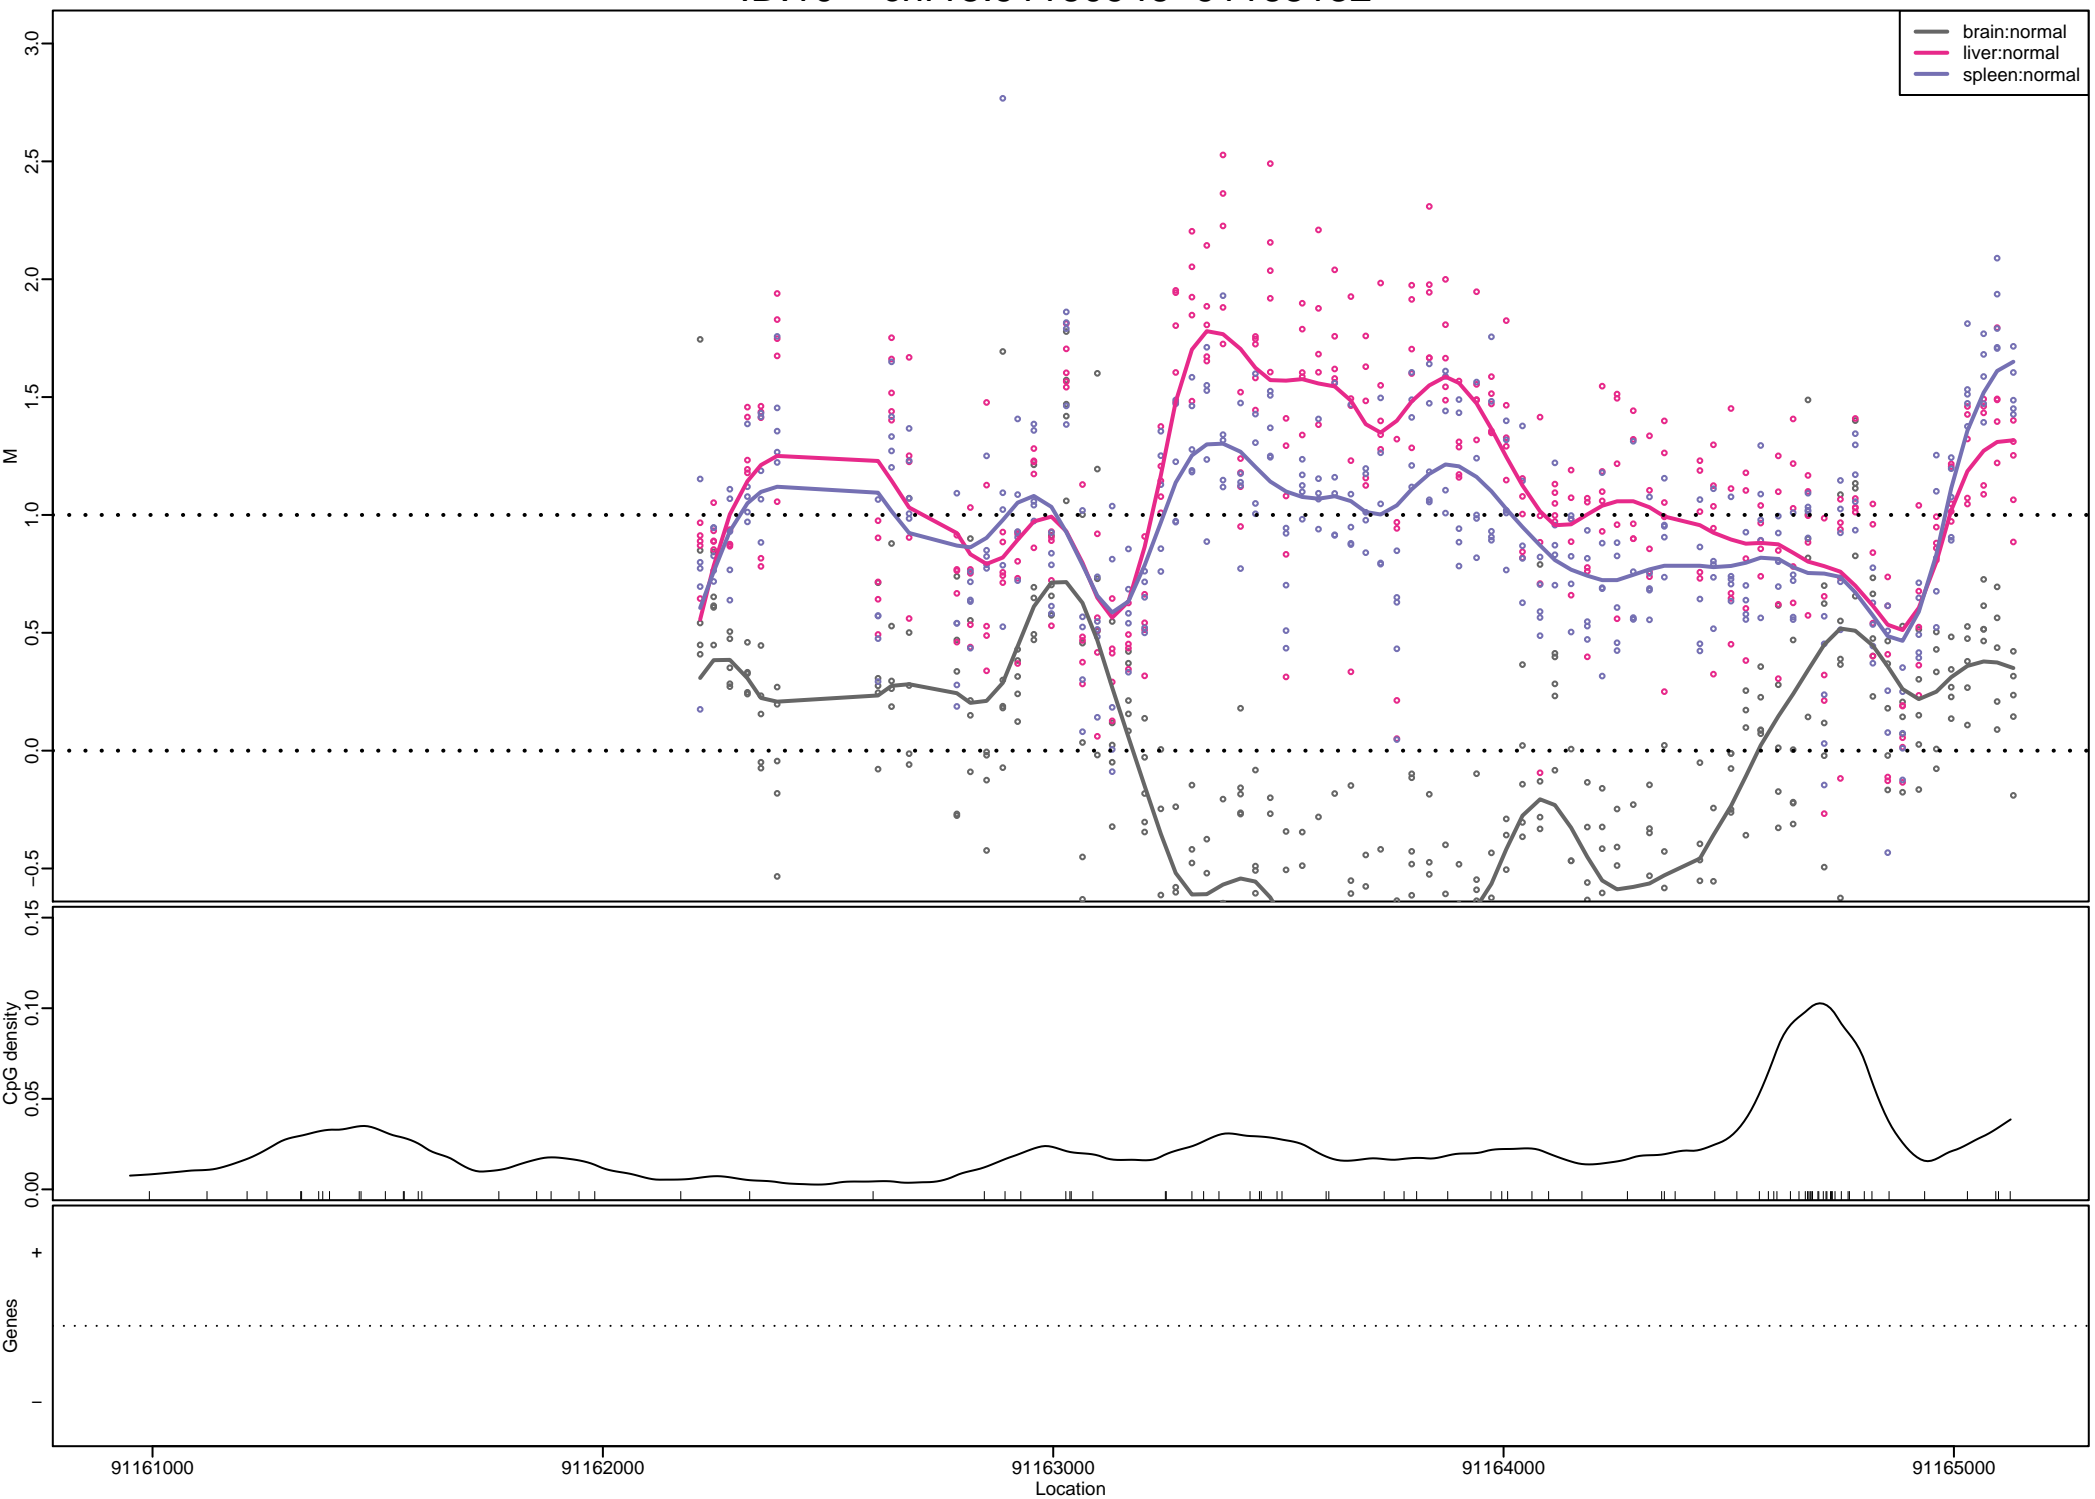

ID:11--chr16:45472380-45477045

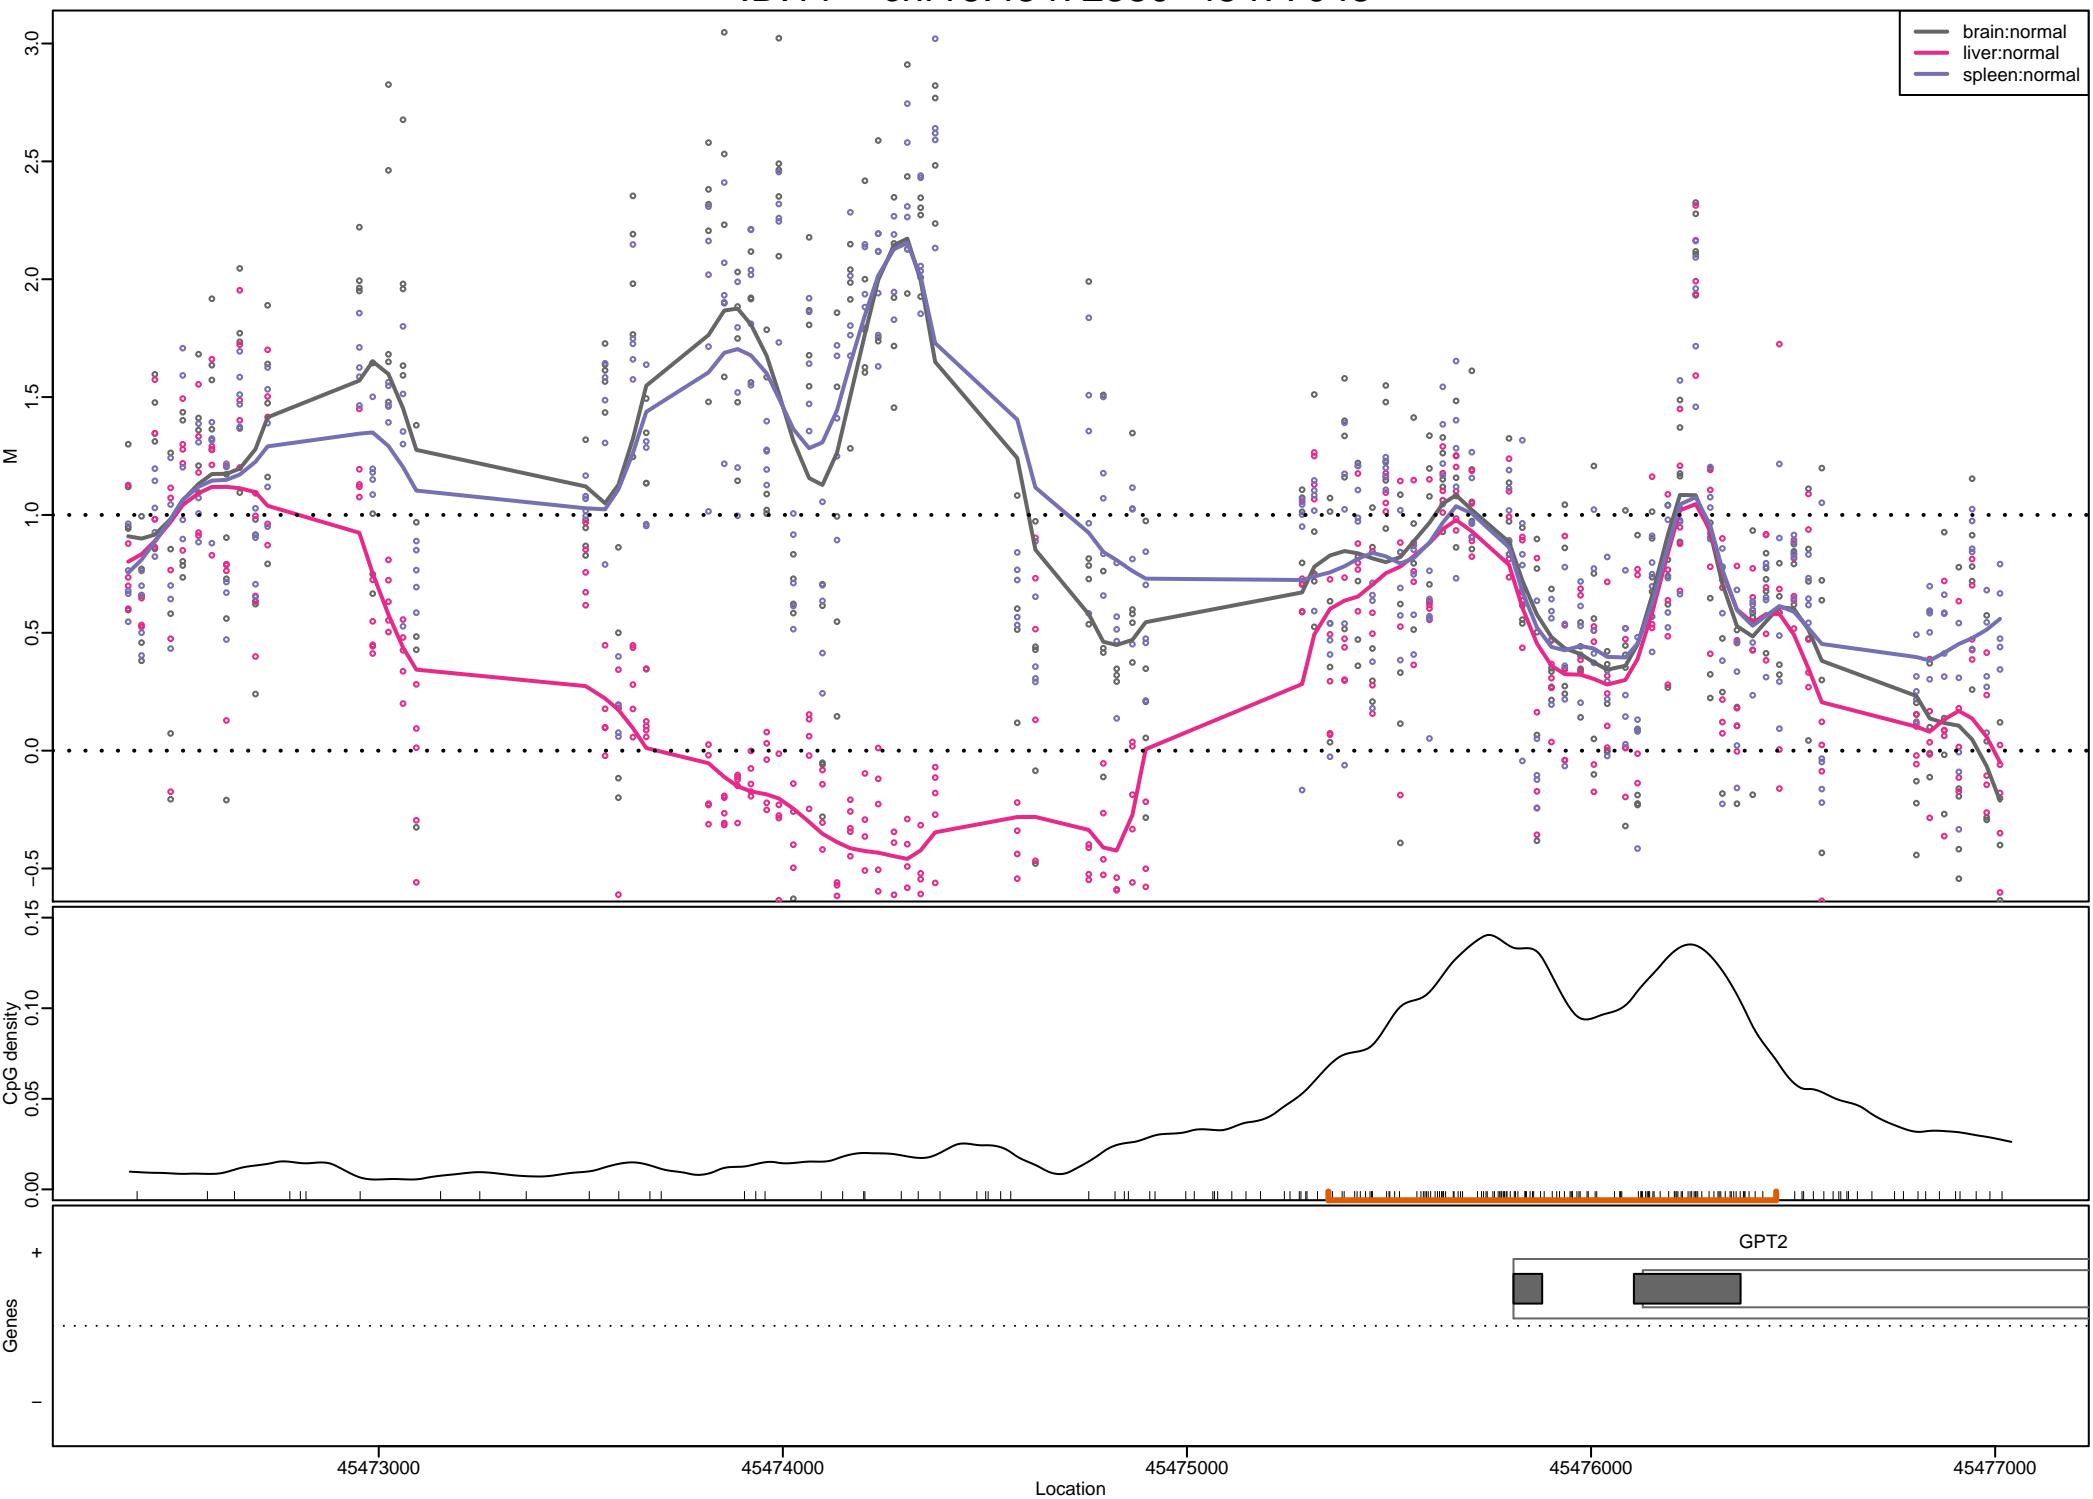

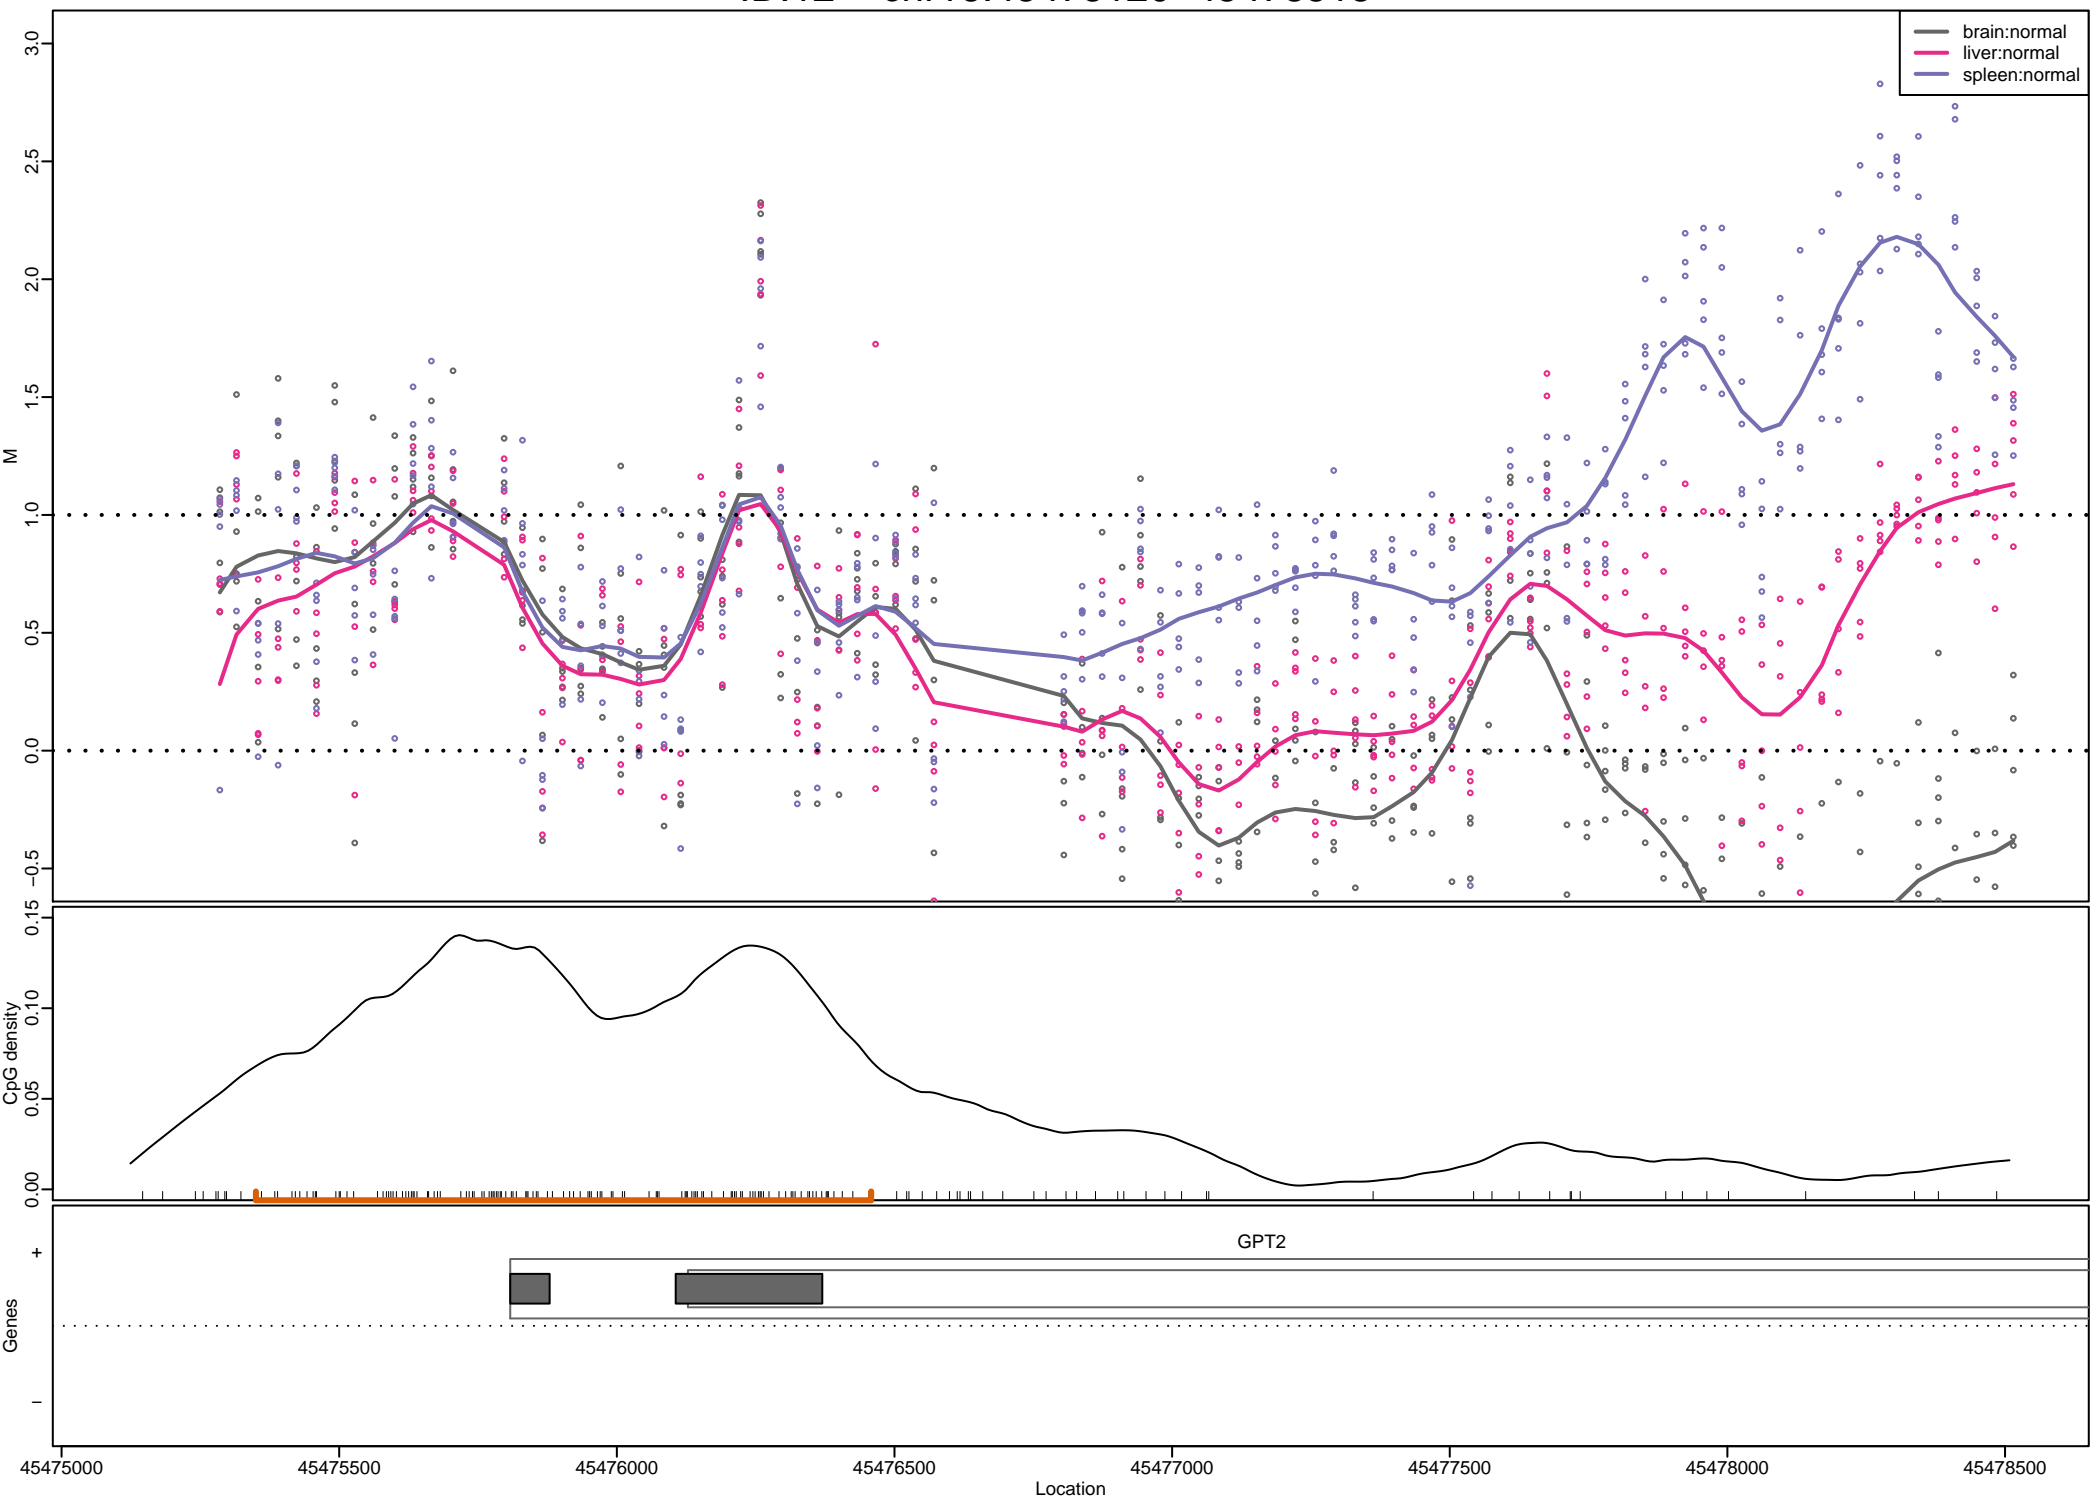

ID:13--chr18:54680657-54684438

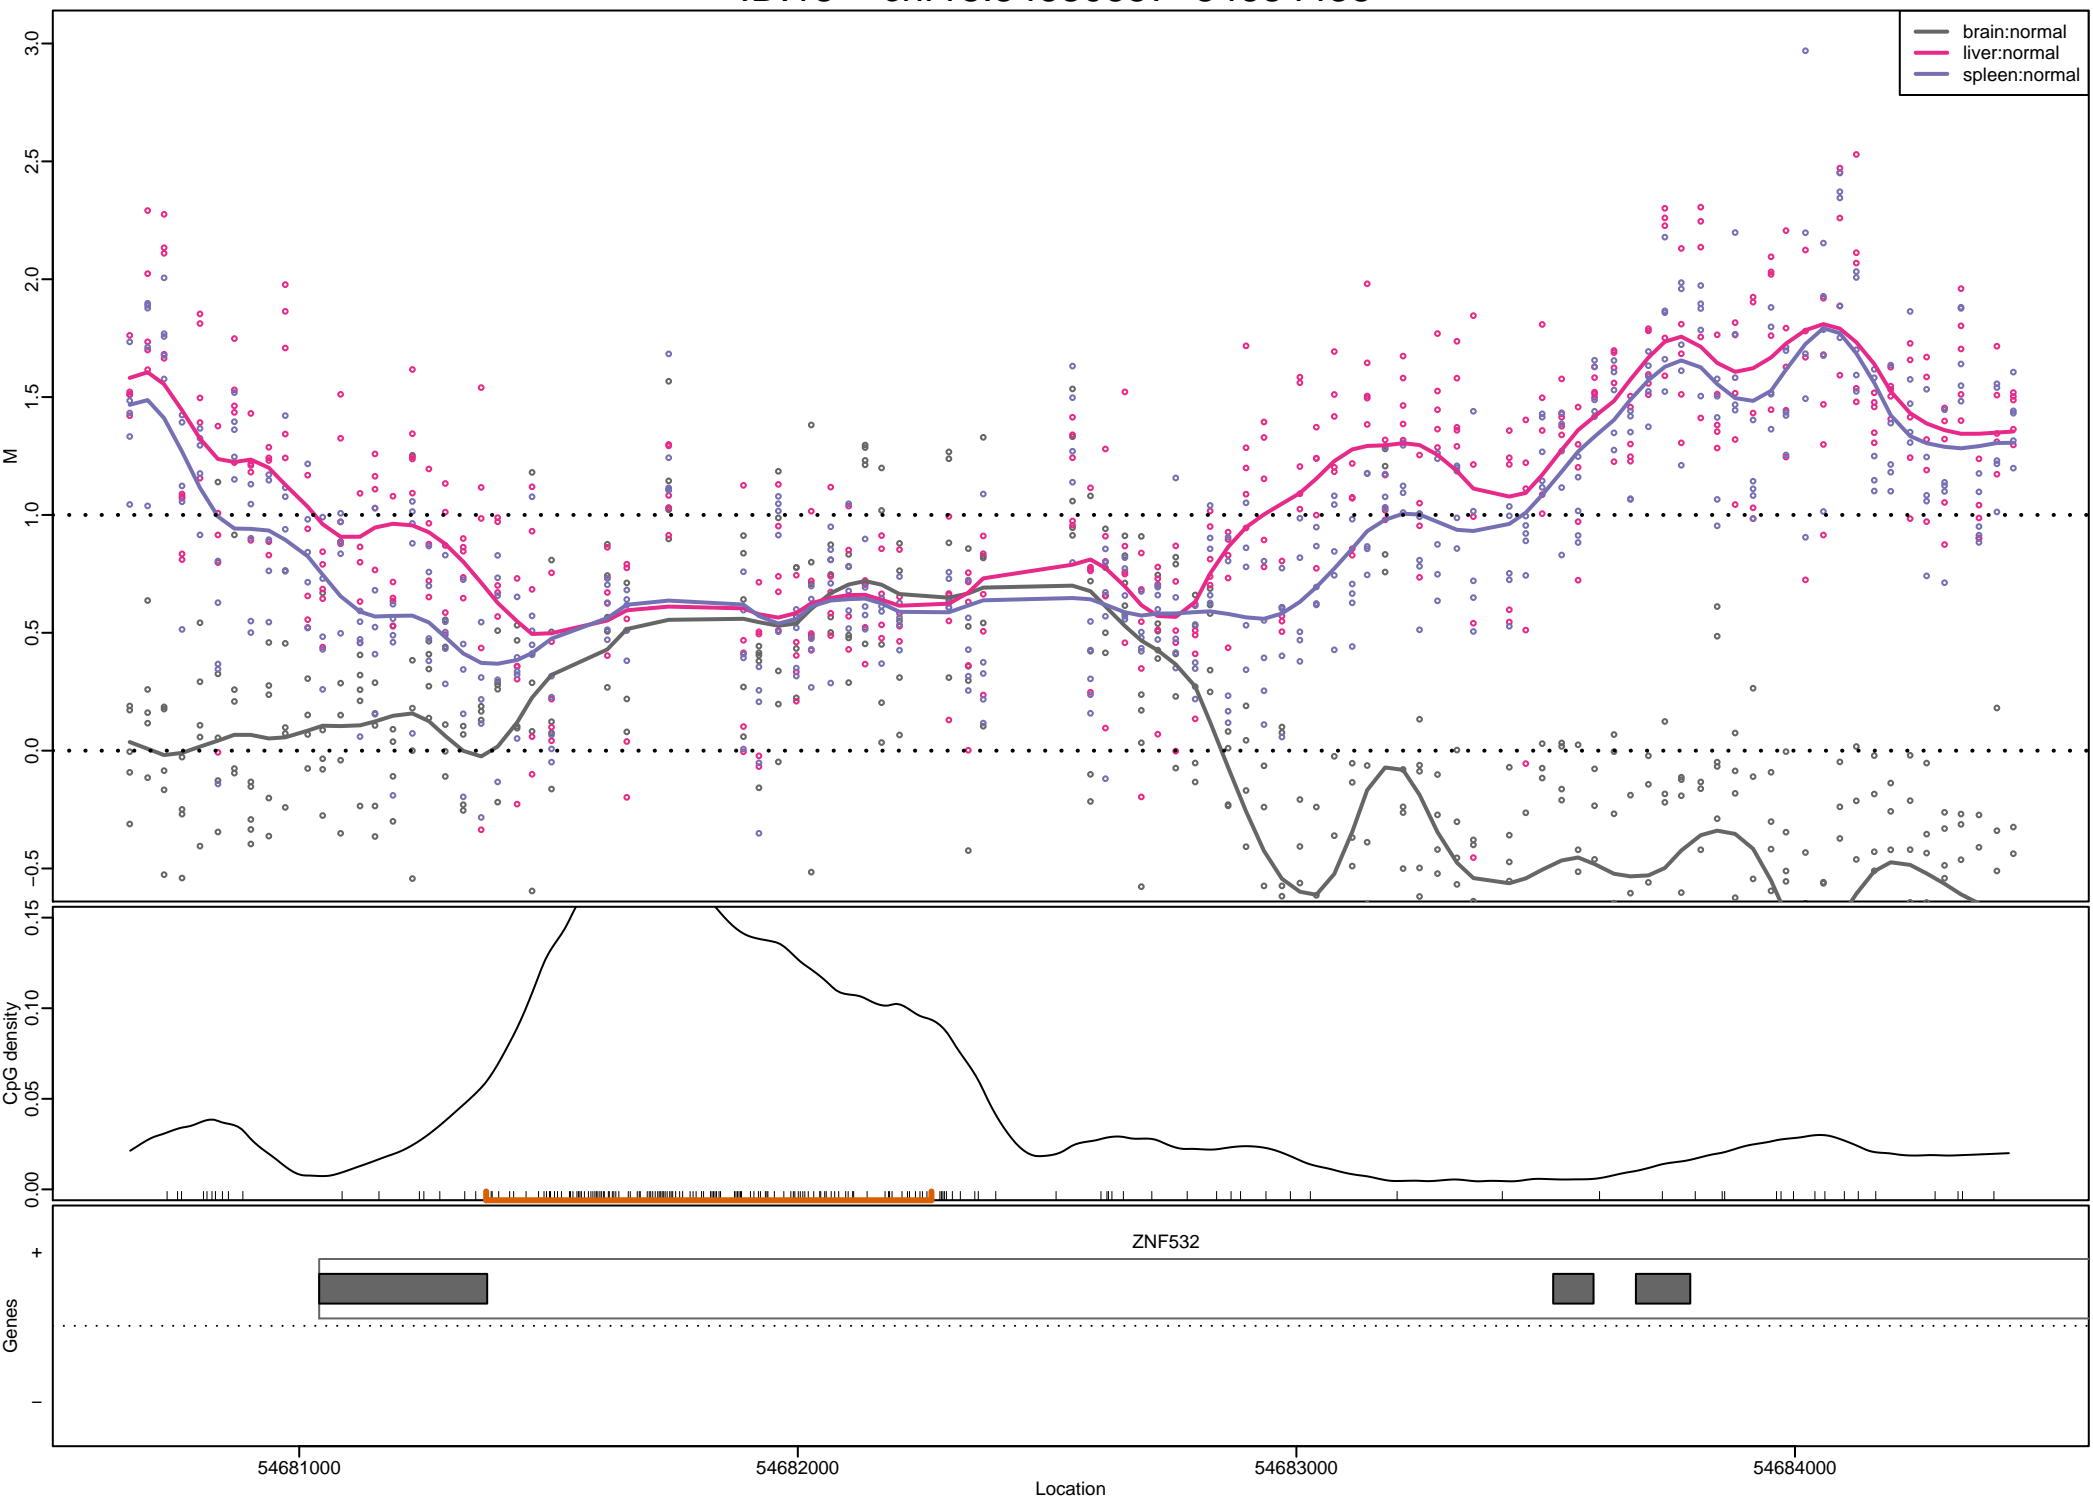

ID:14--chr2:54536581-54540575

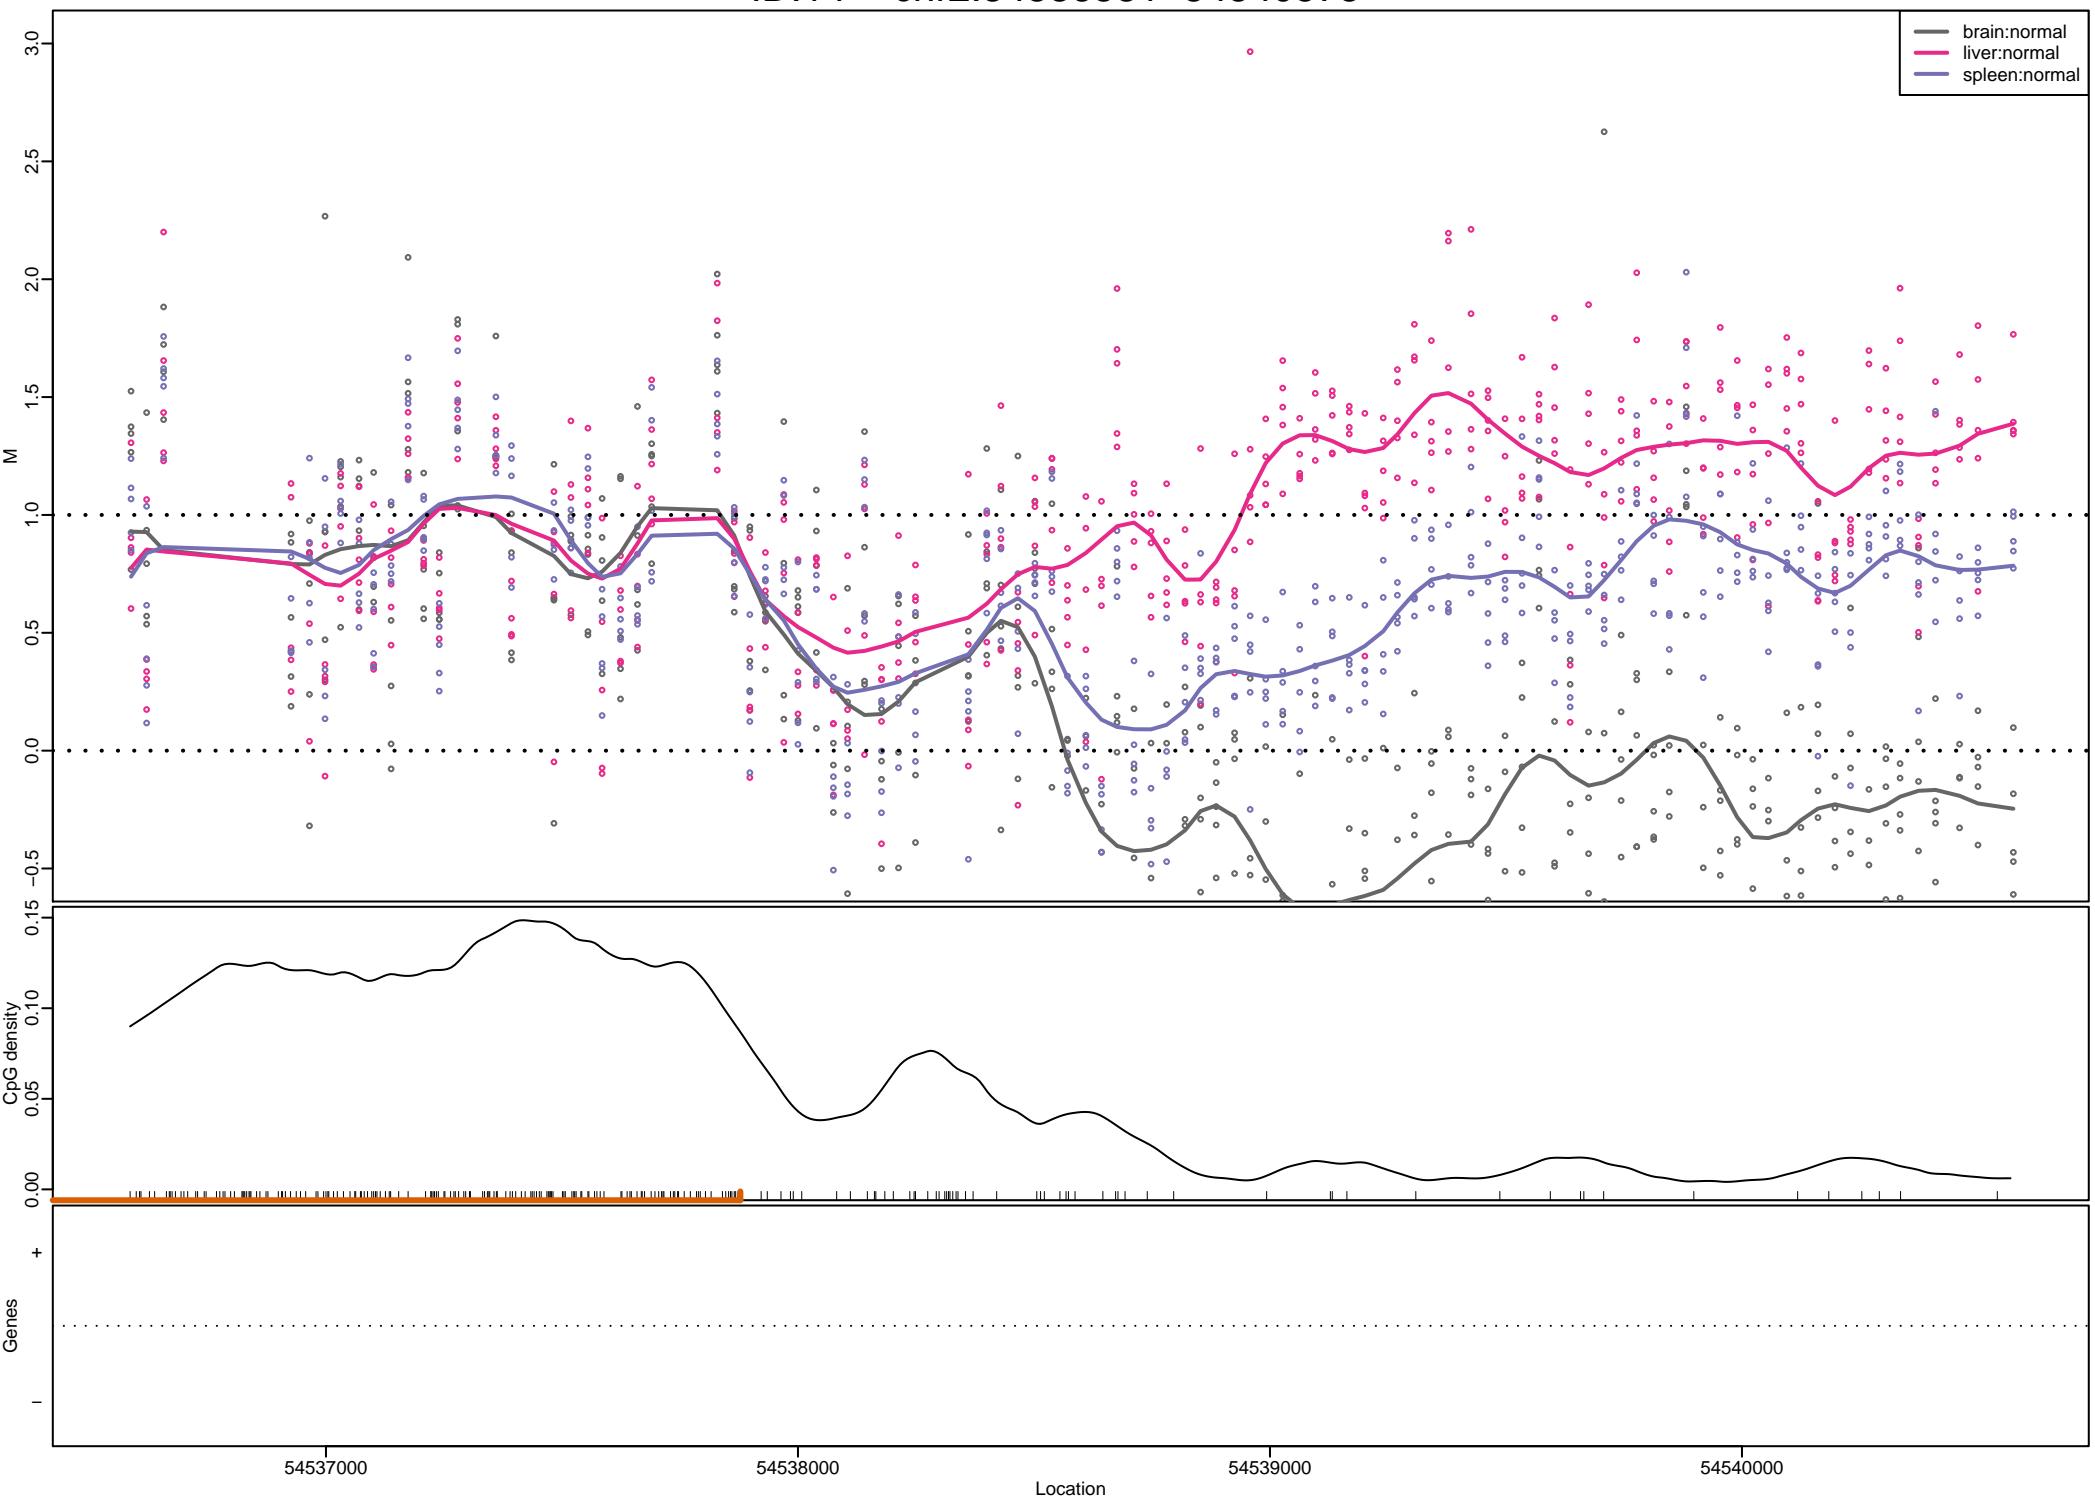

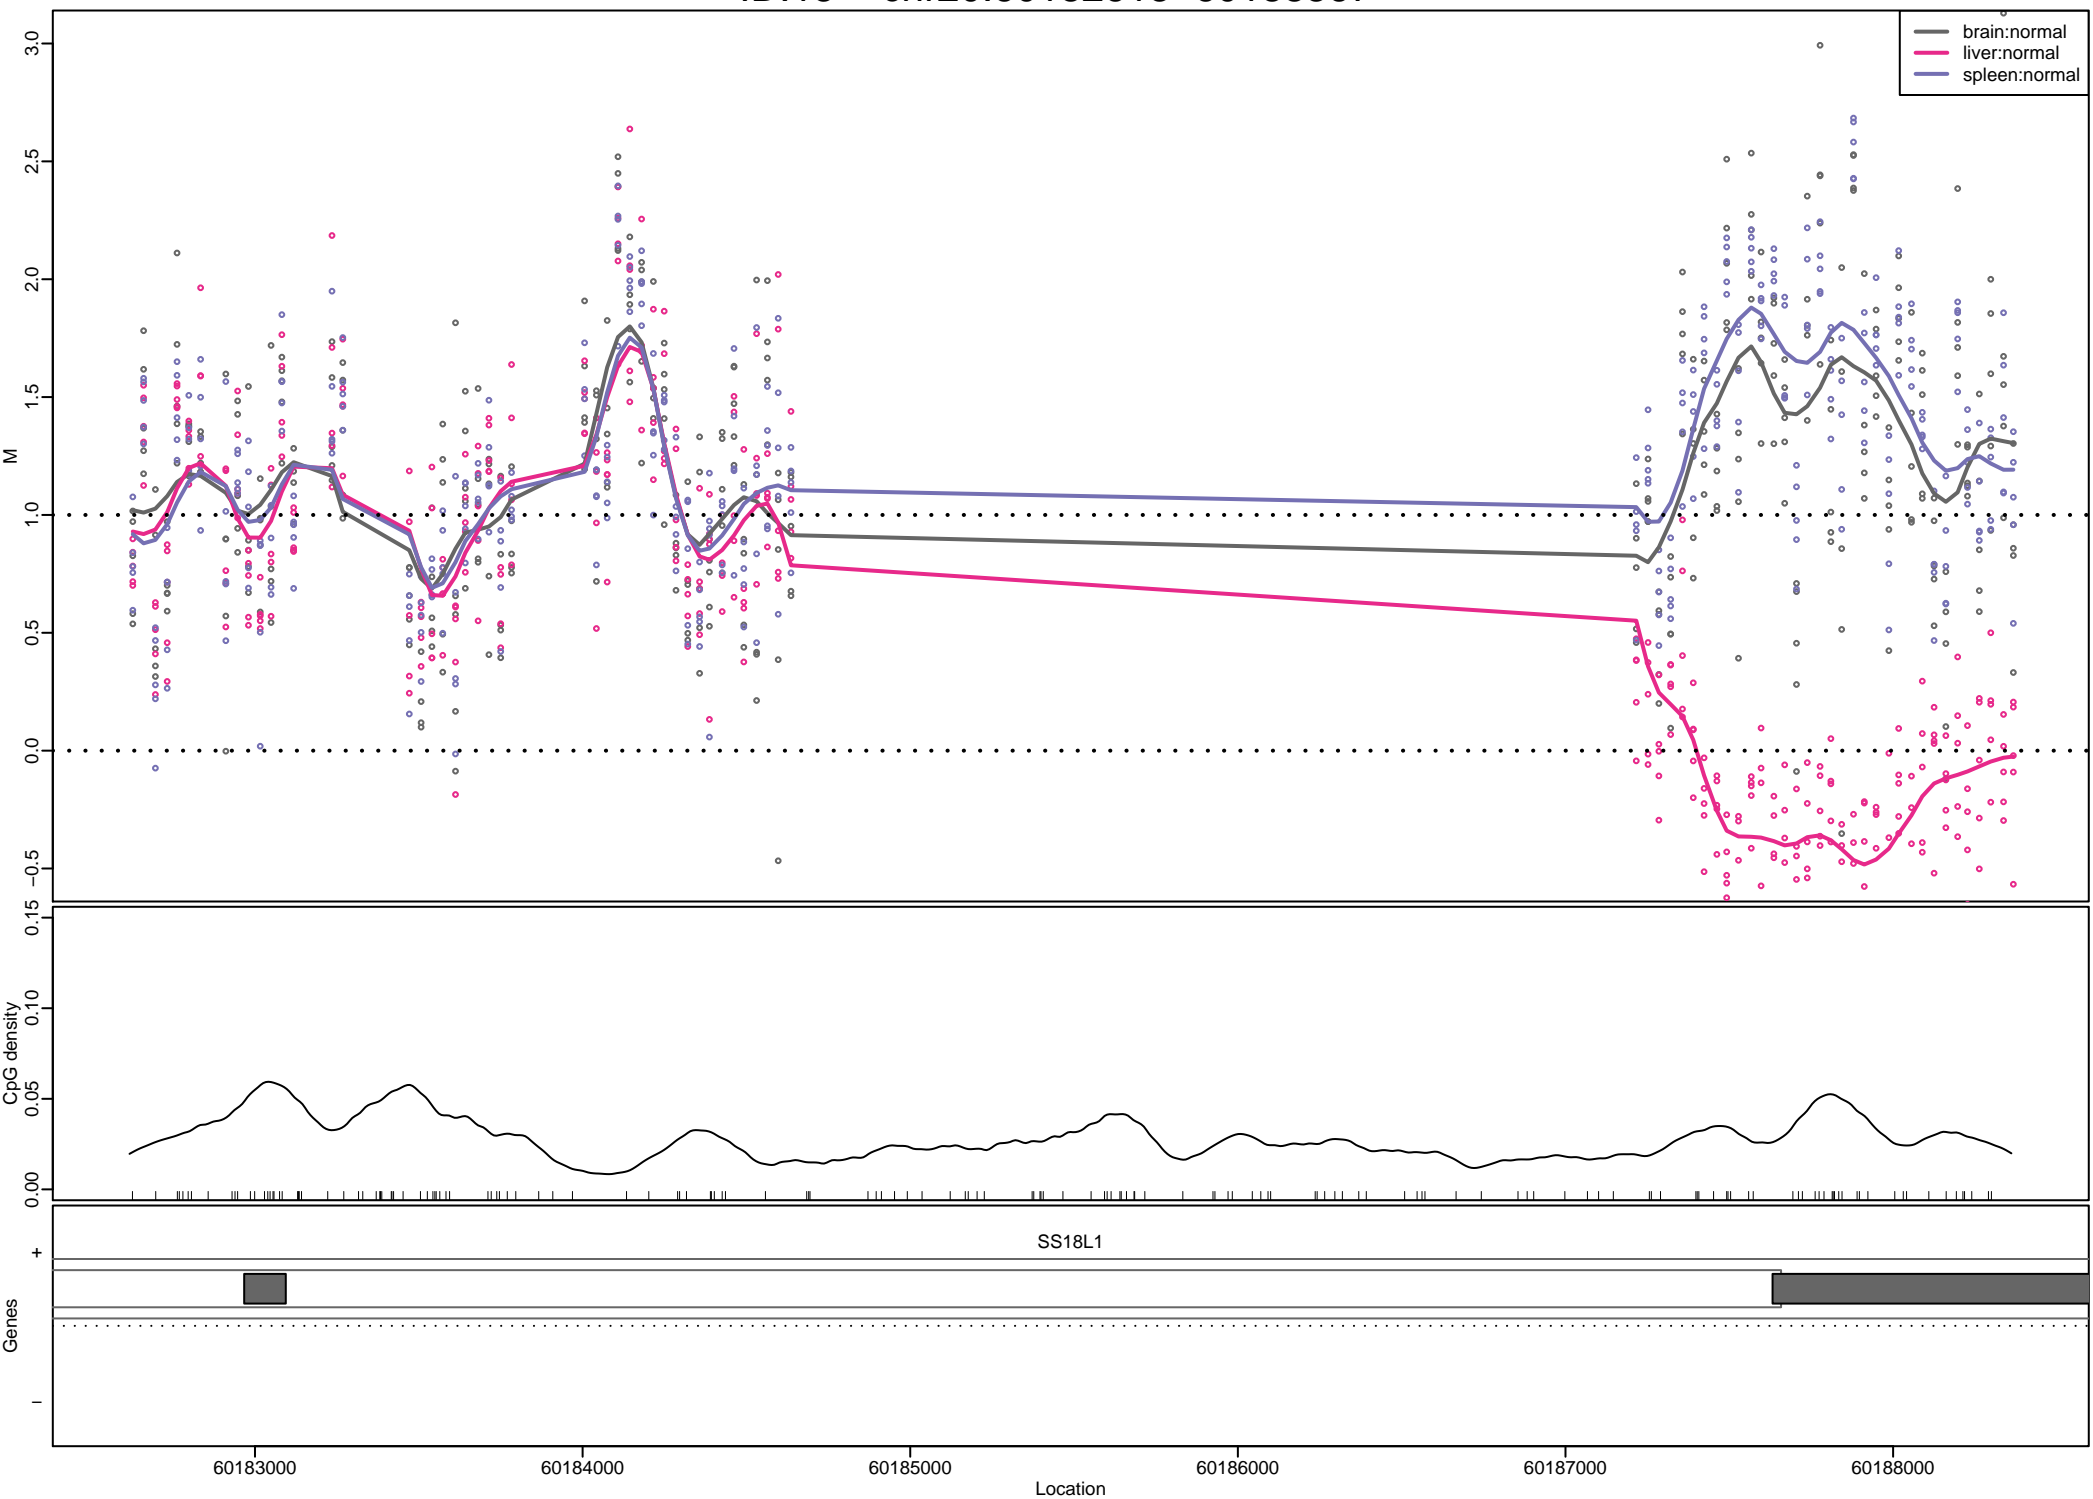

ID:16--chr4:99796292-99800165

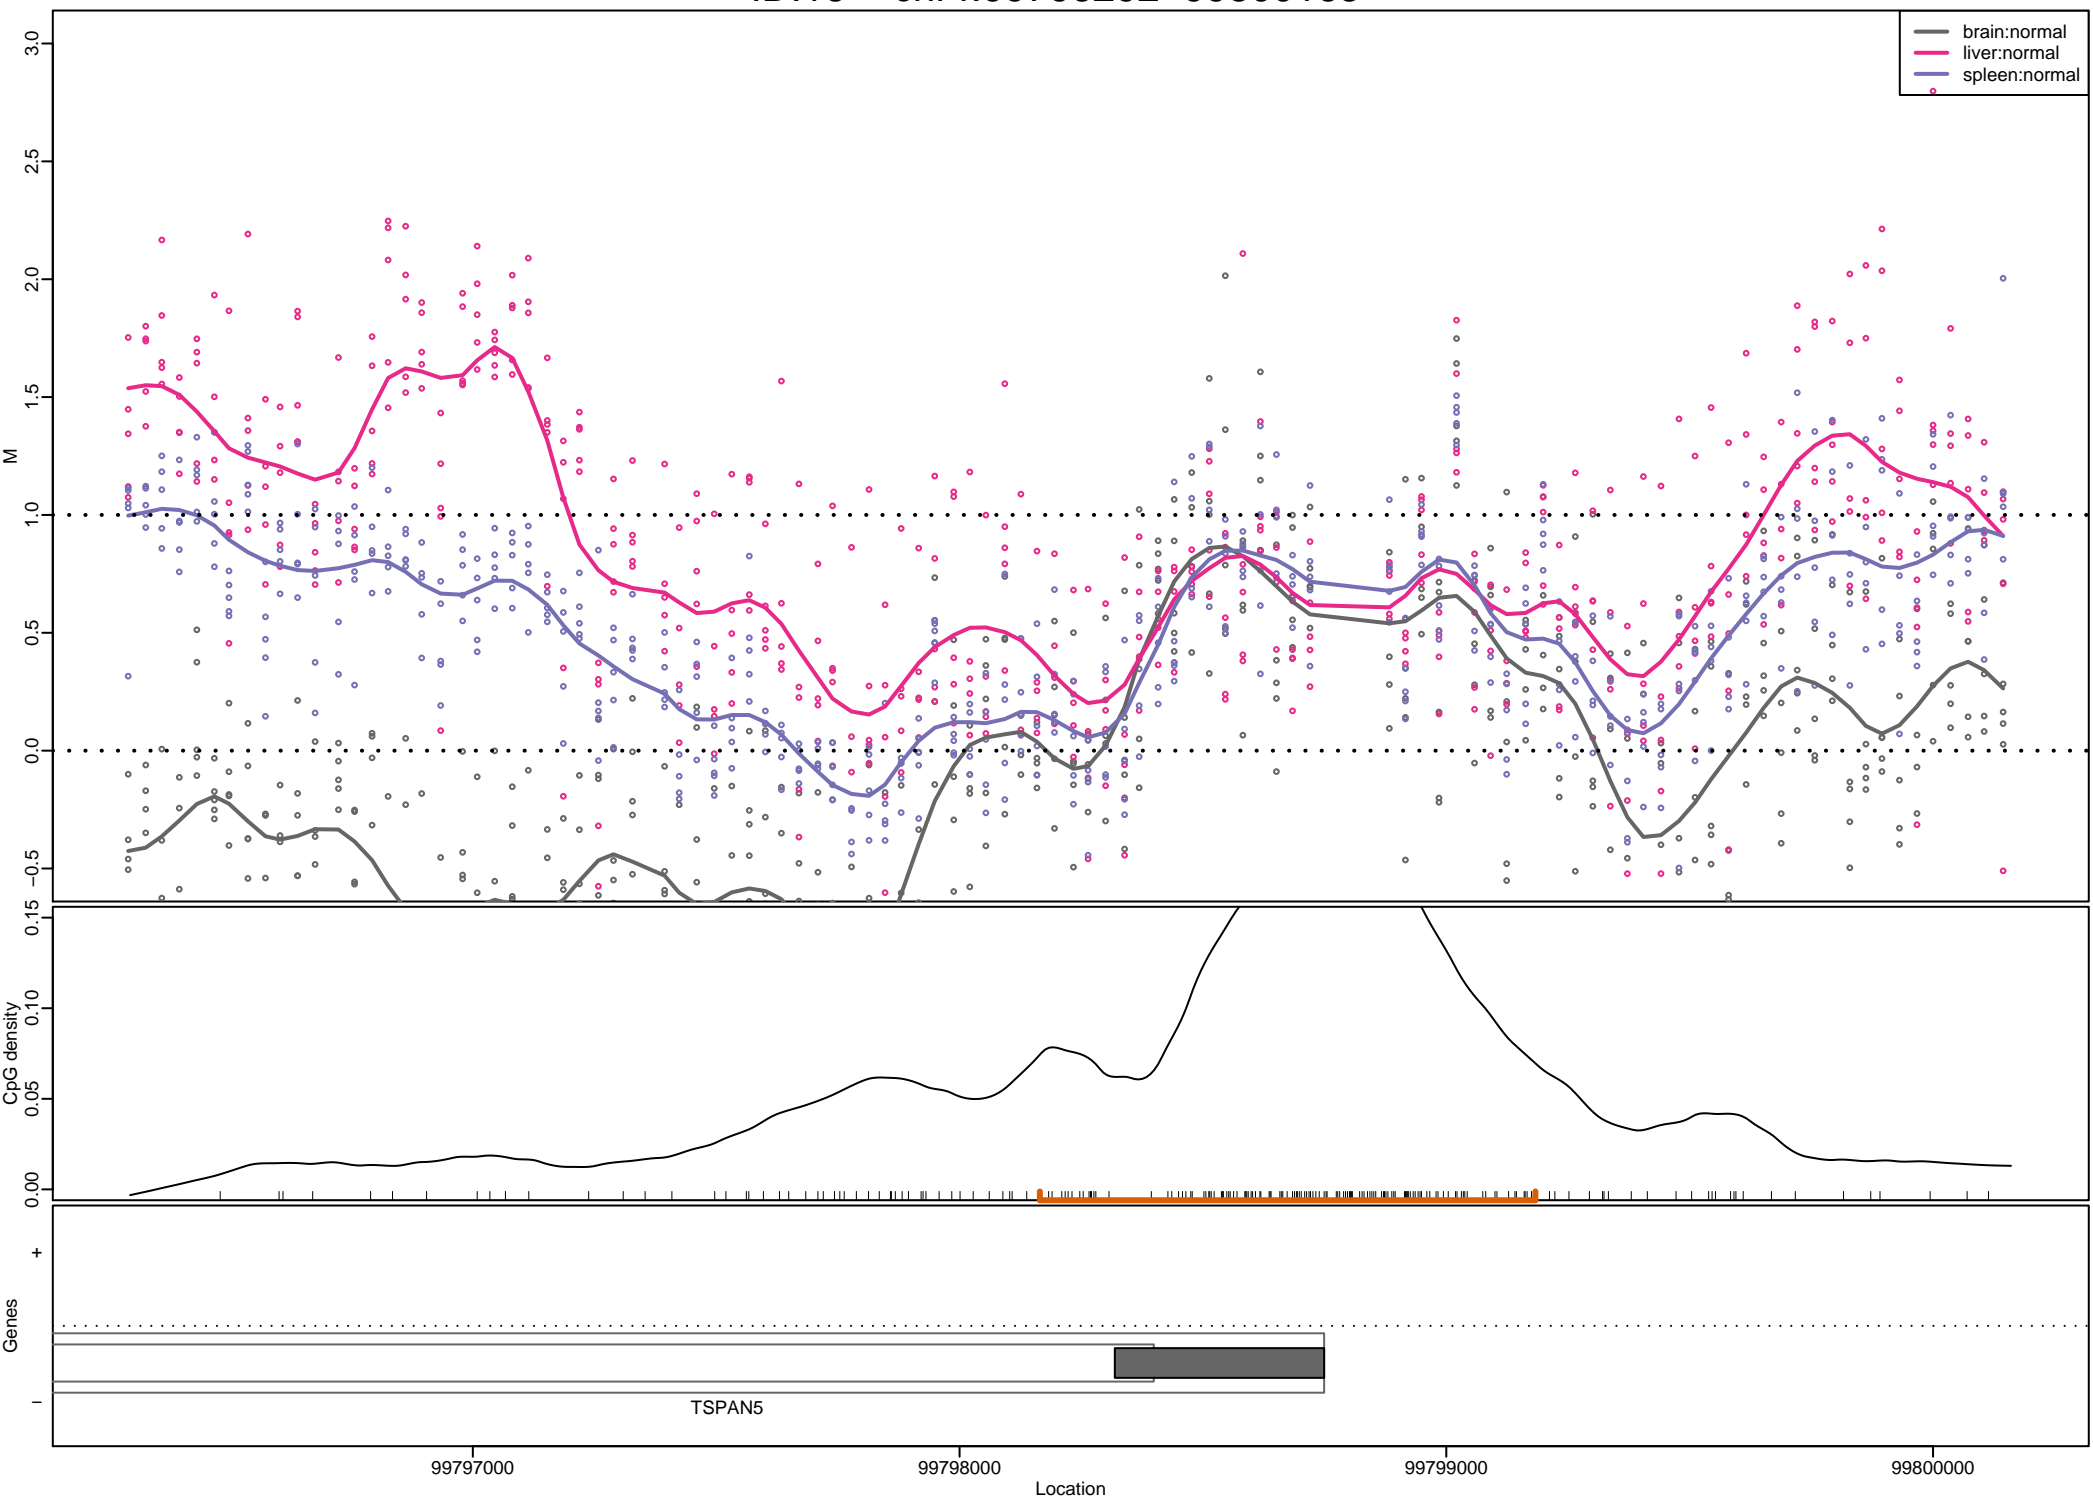

ID:17--chr5:98136346-98139654

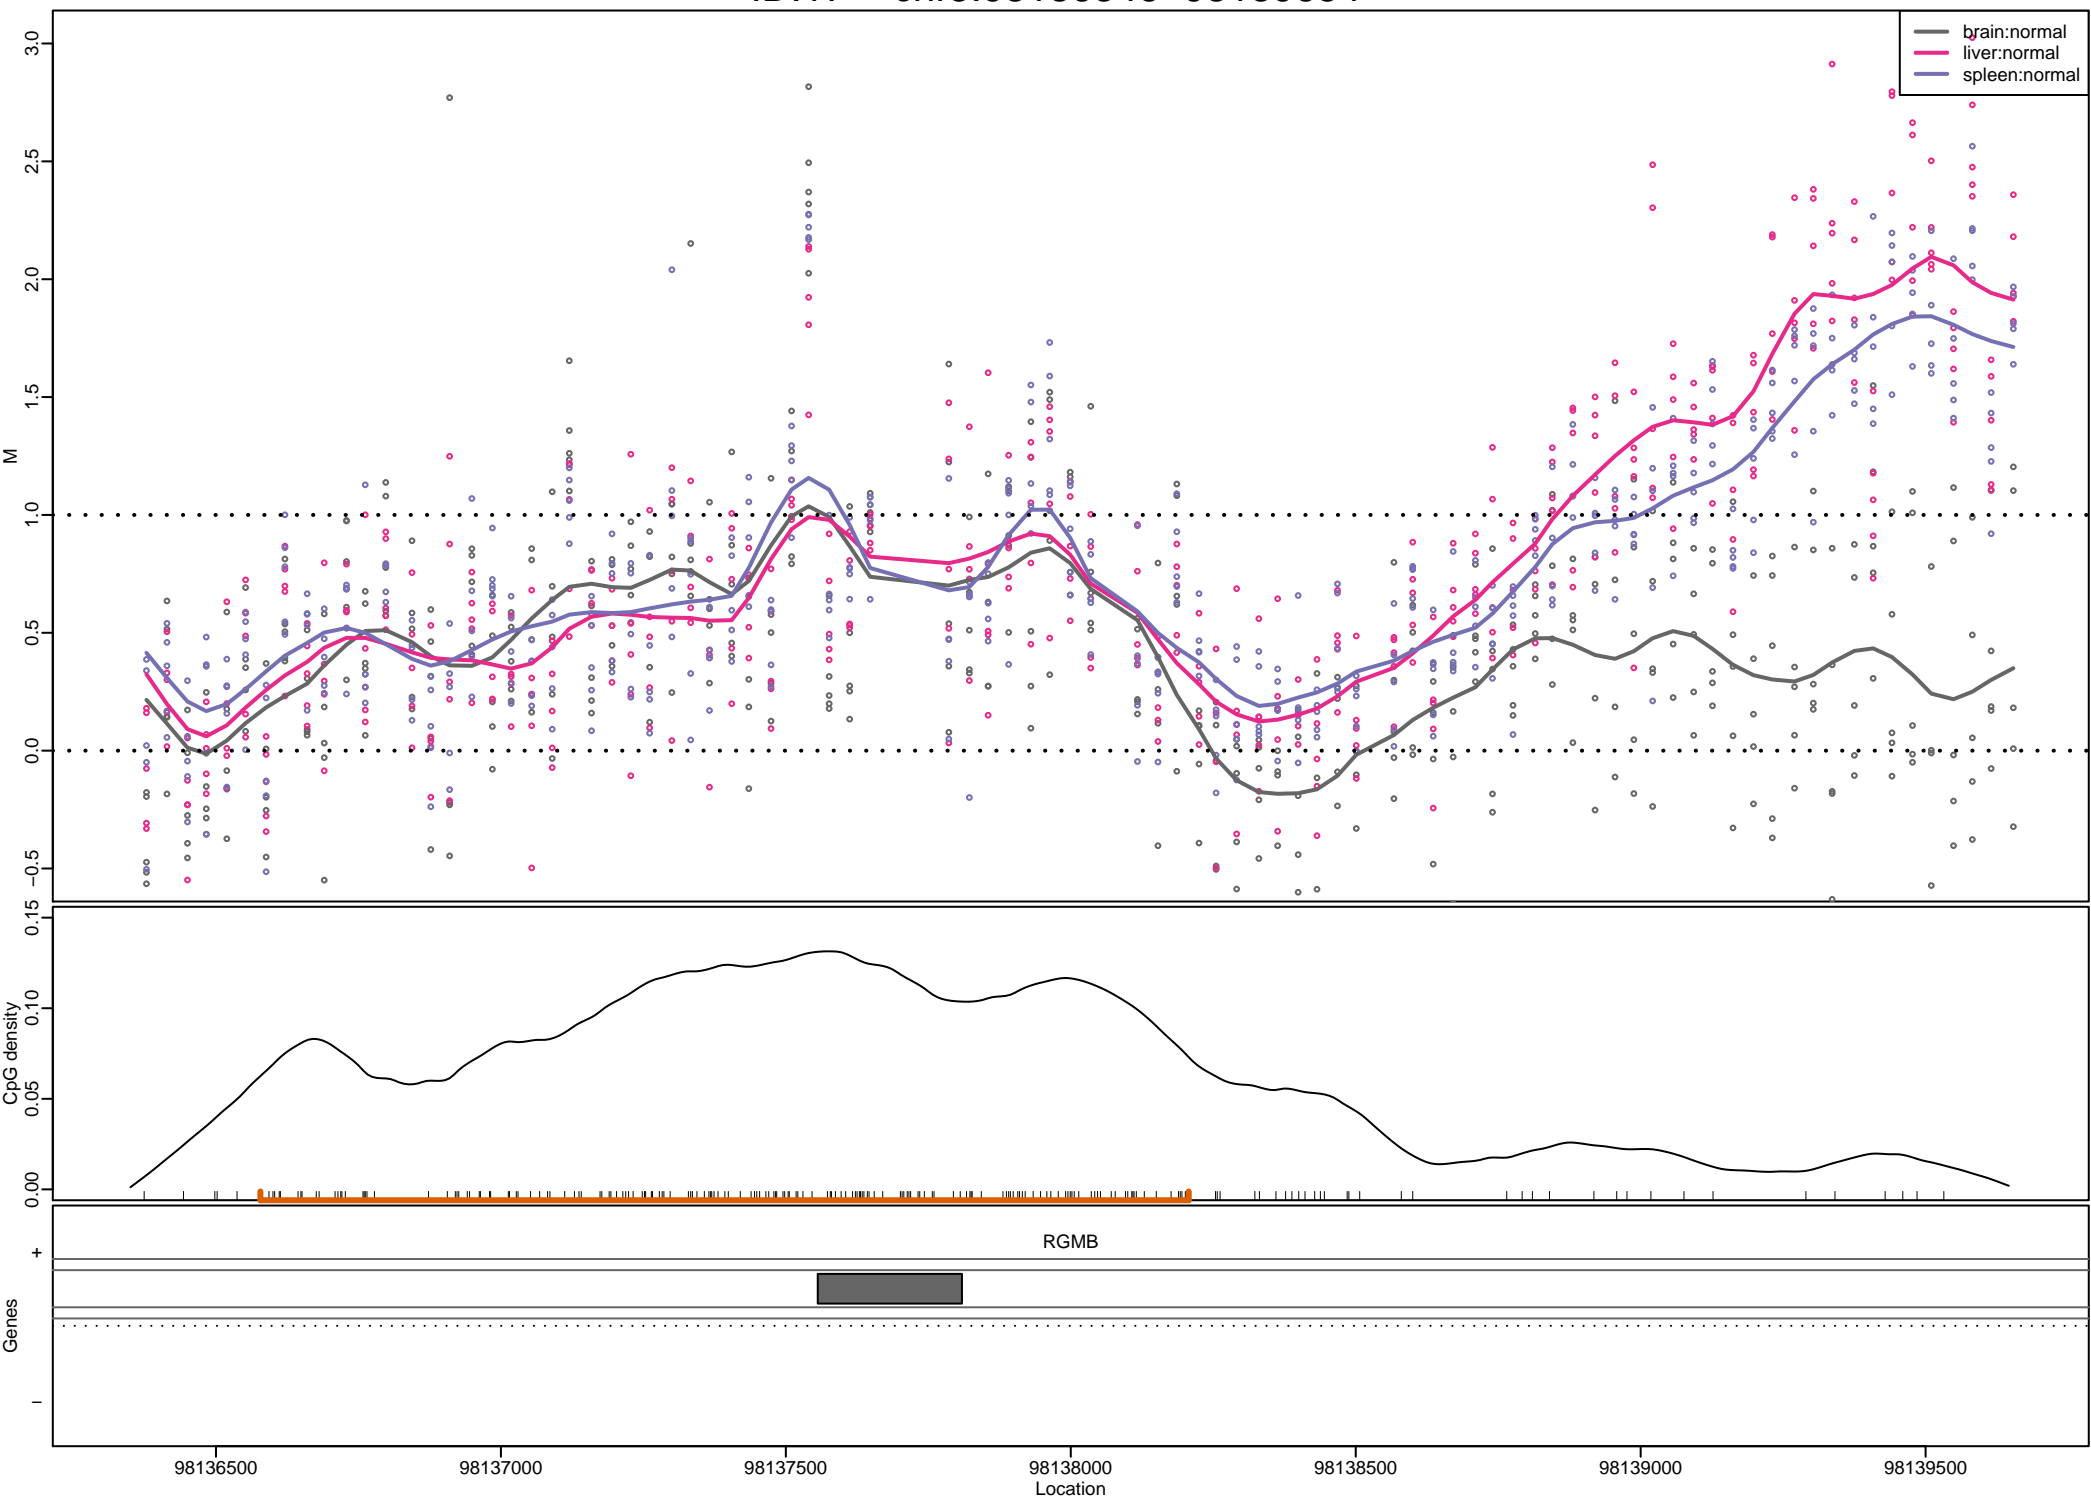

ID:18--chr8:17313402-17317163

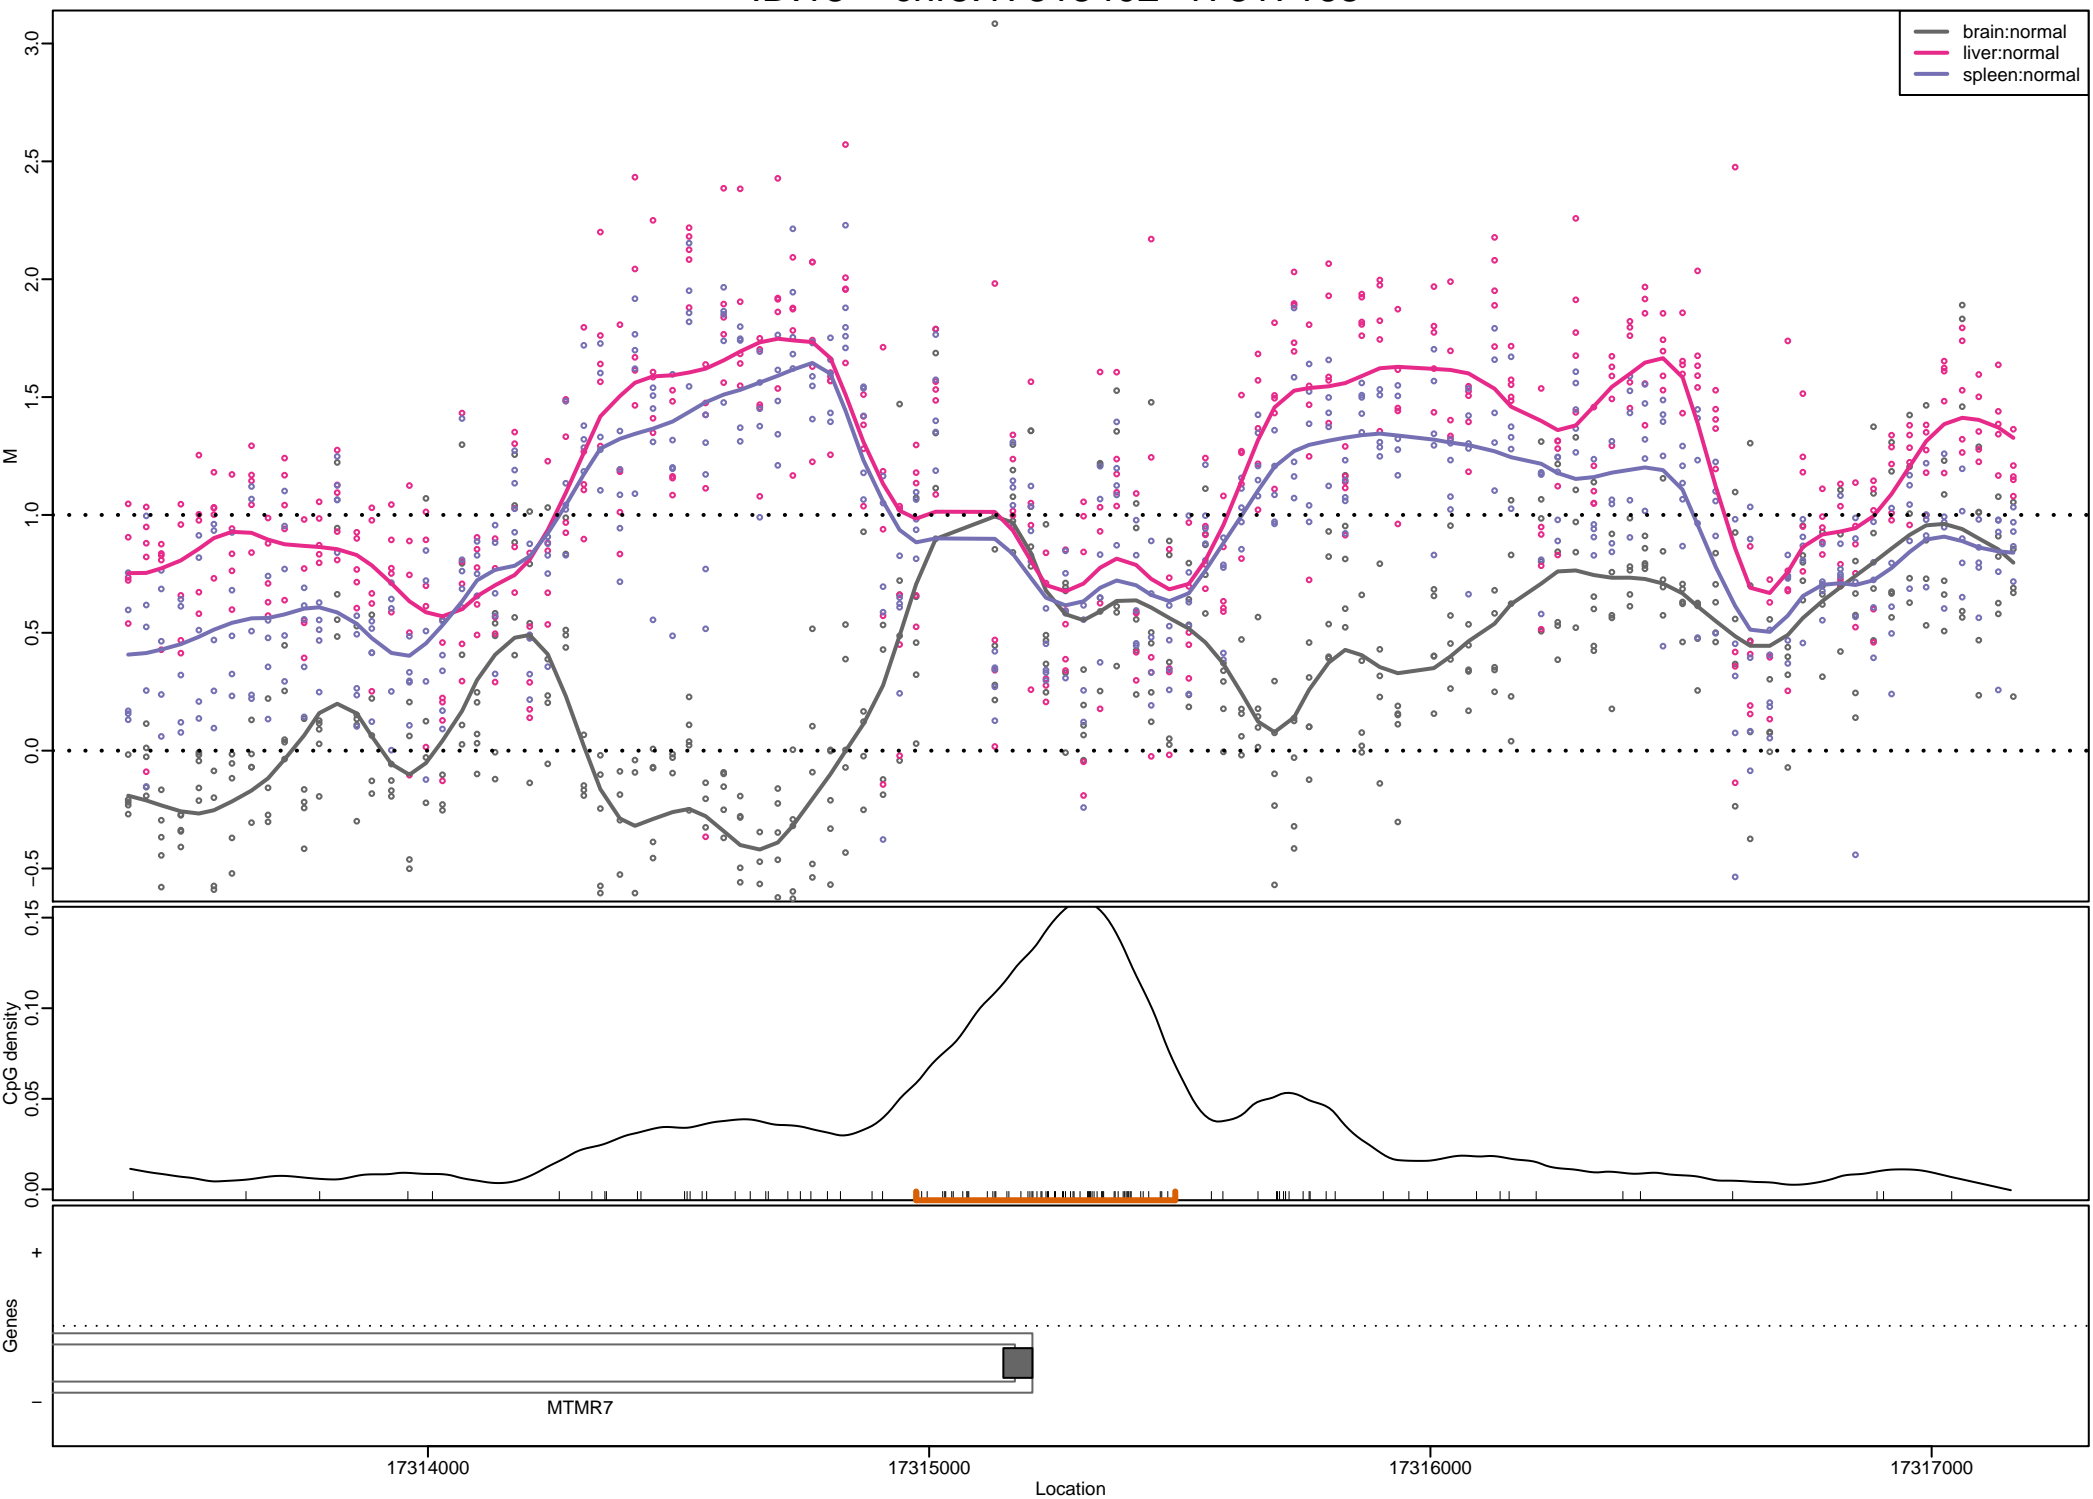

ID:19--chr8:75424581-75426226

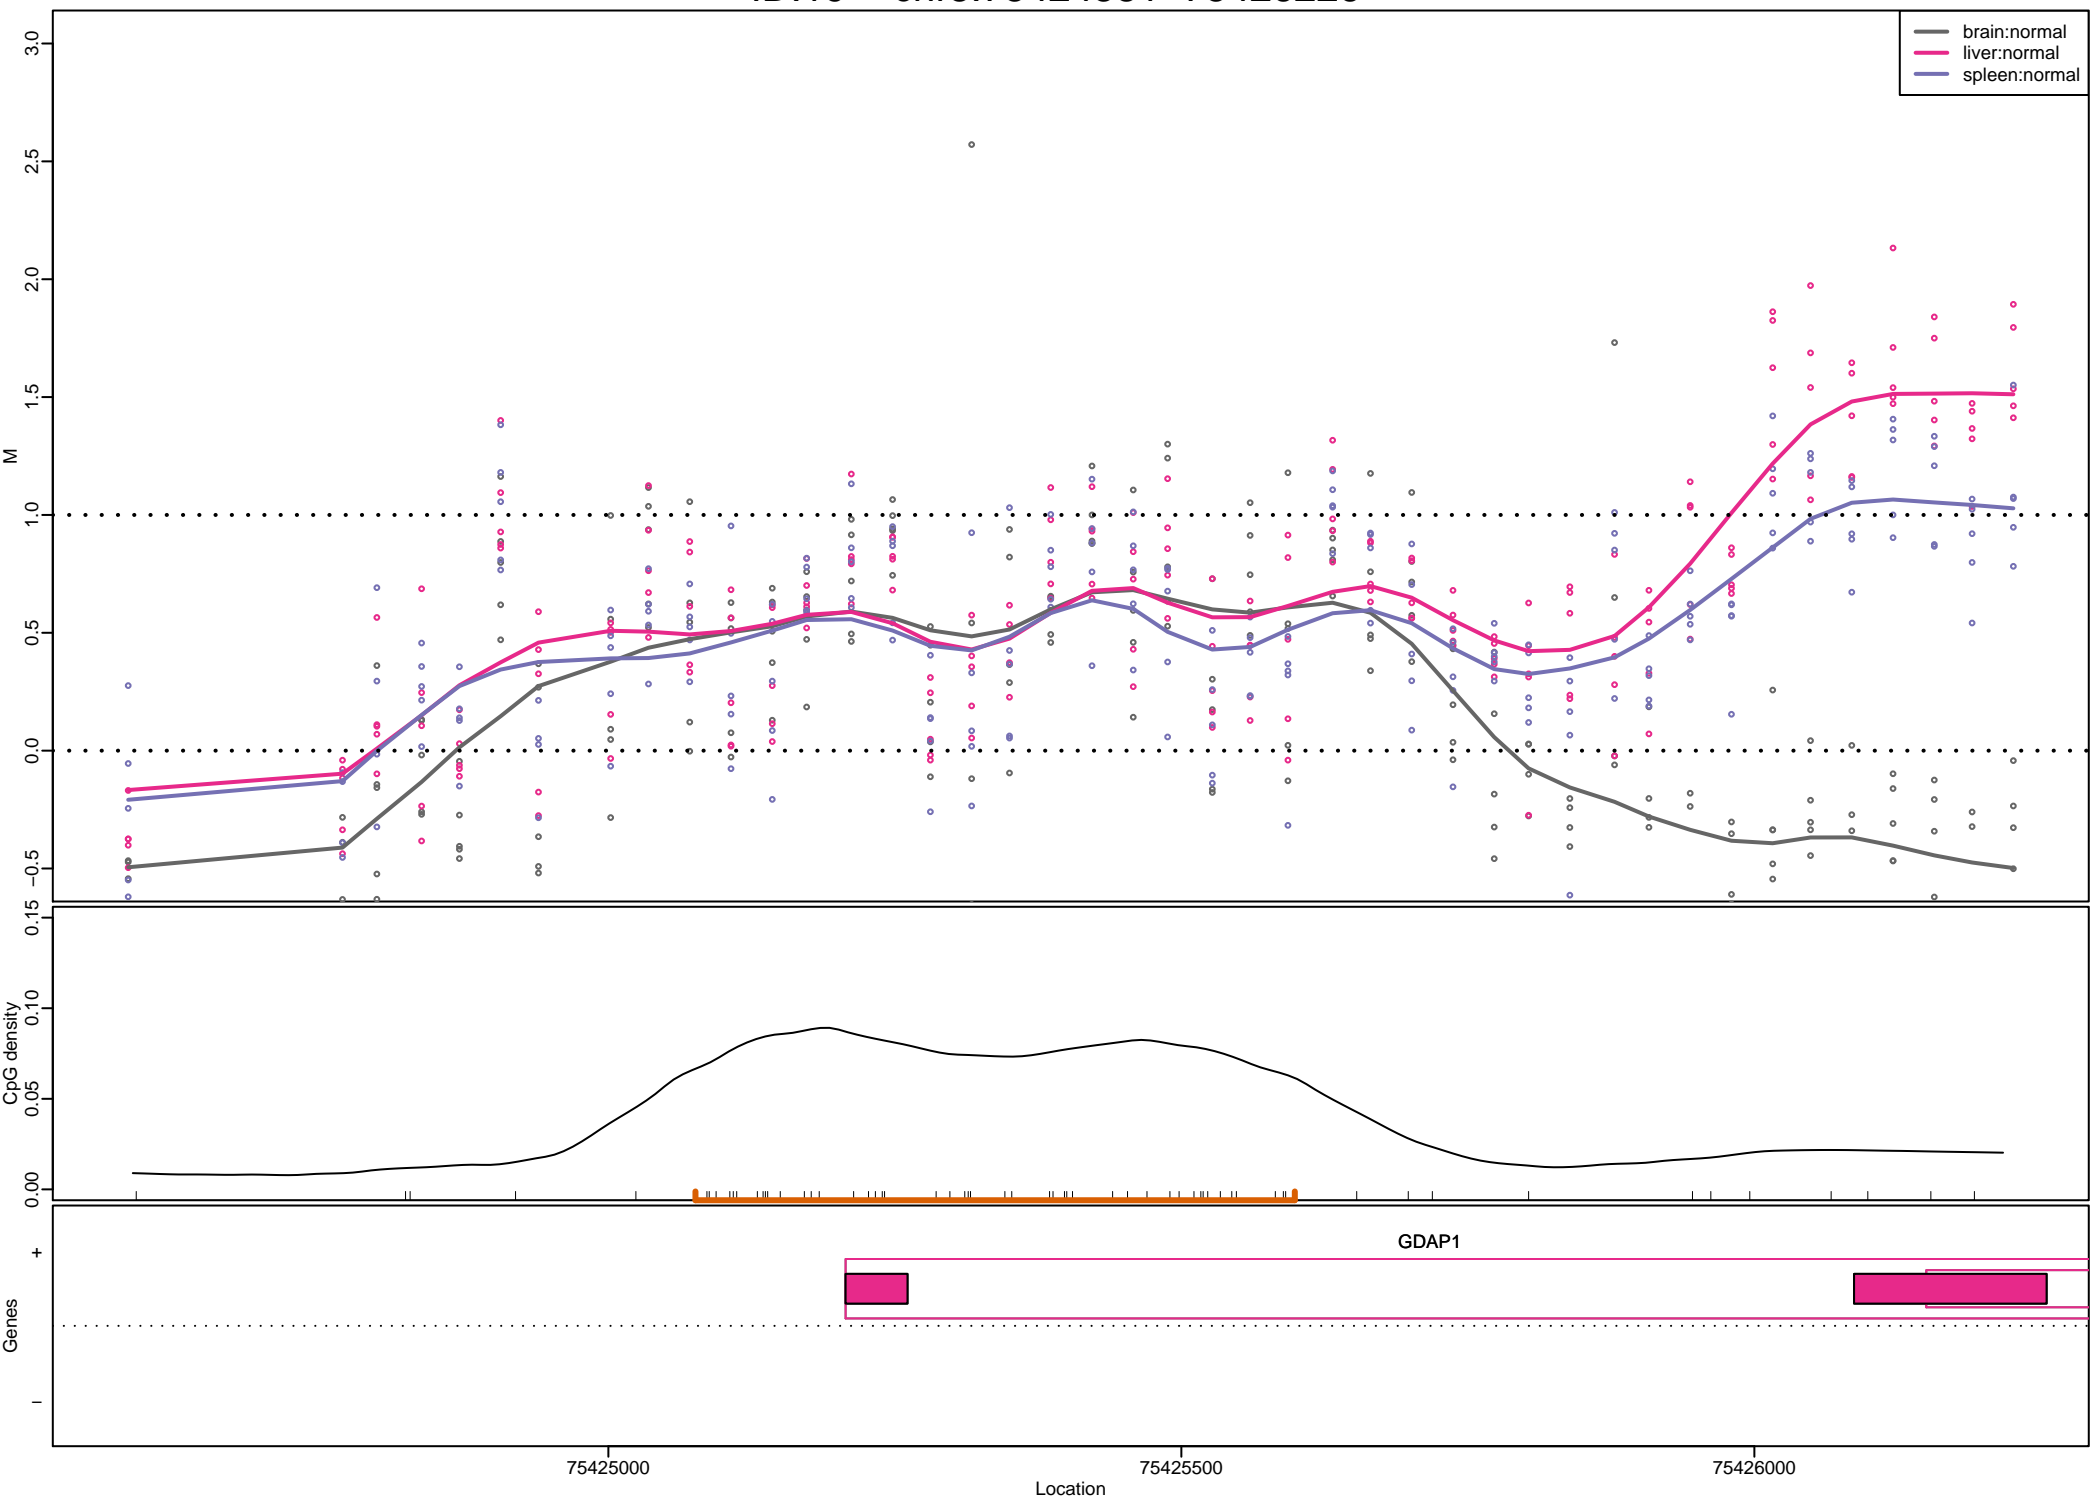

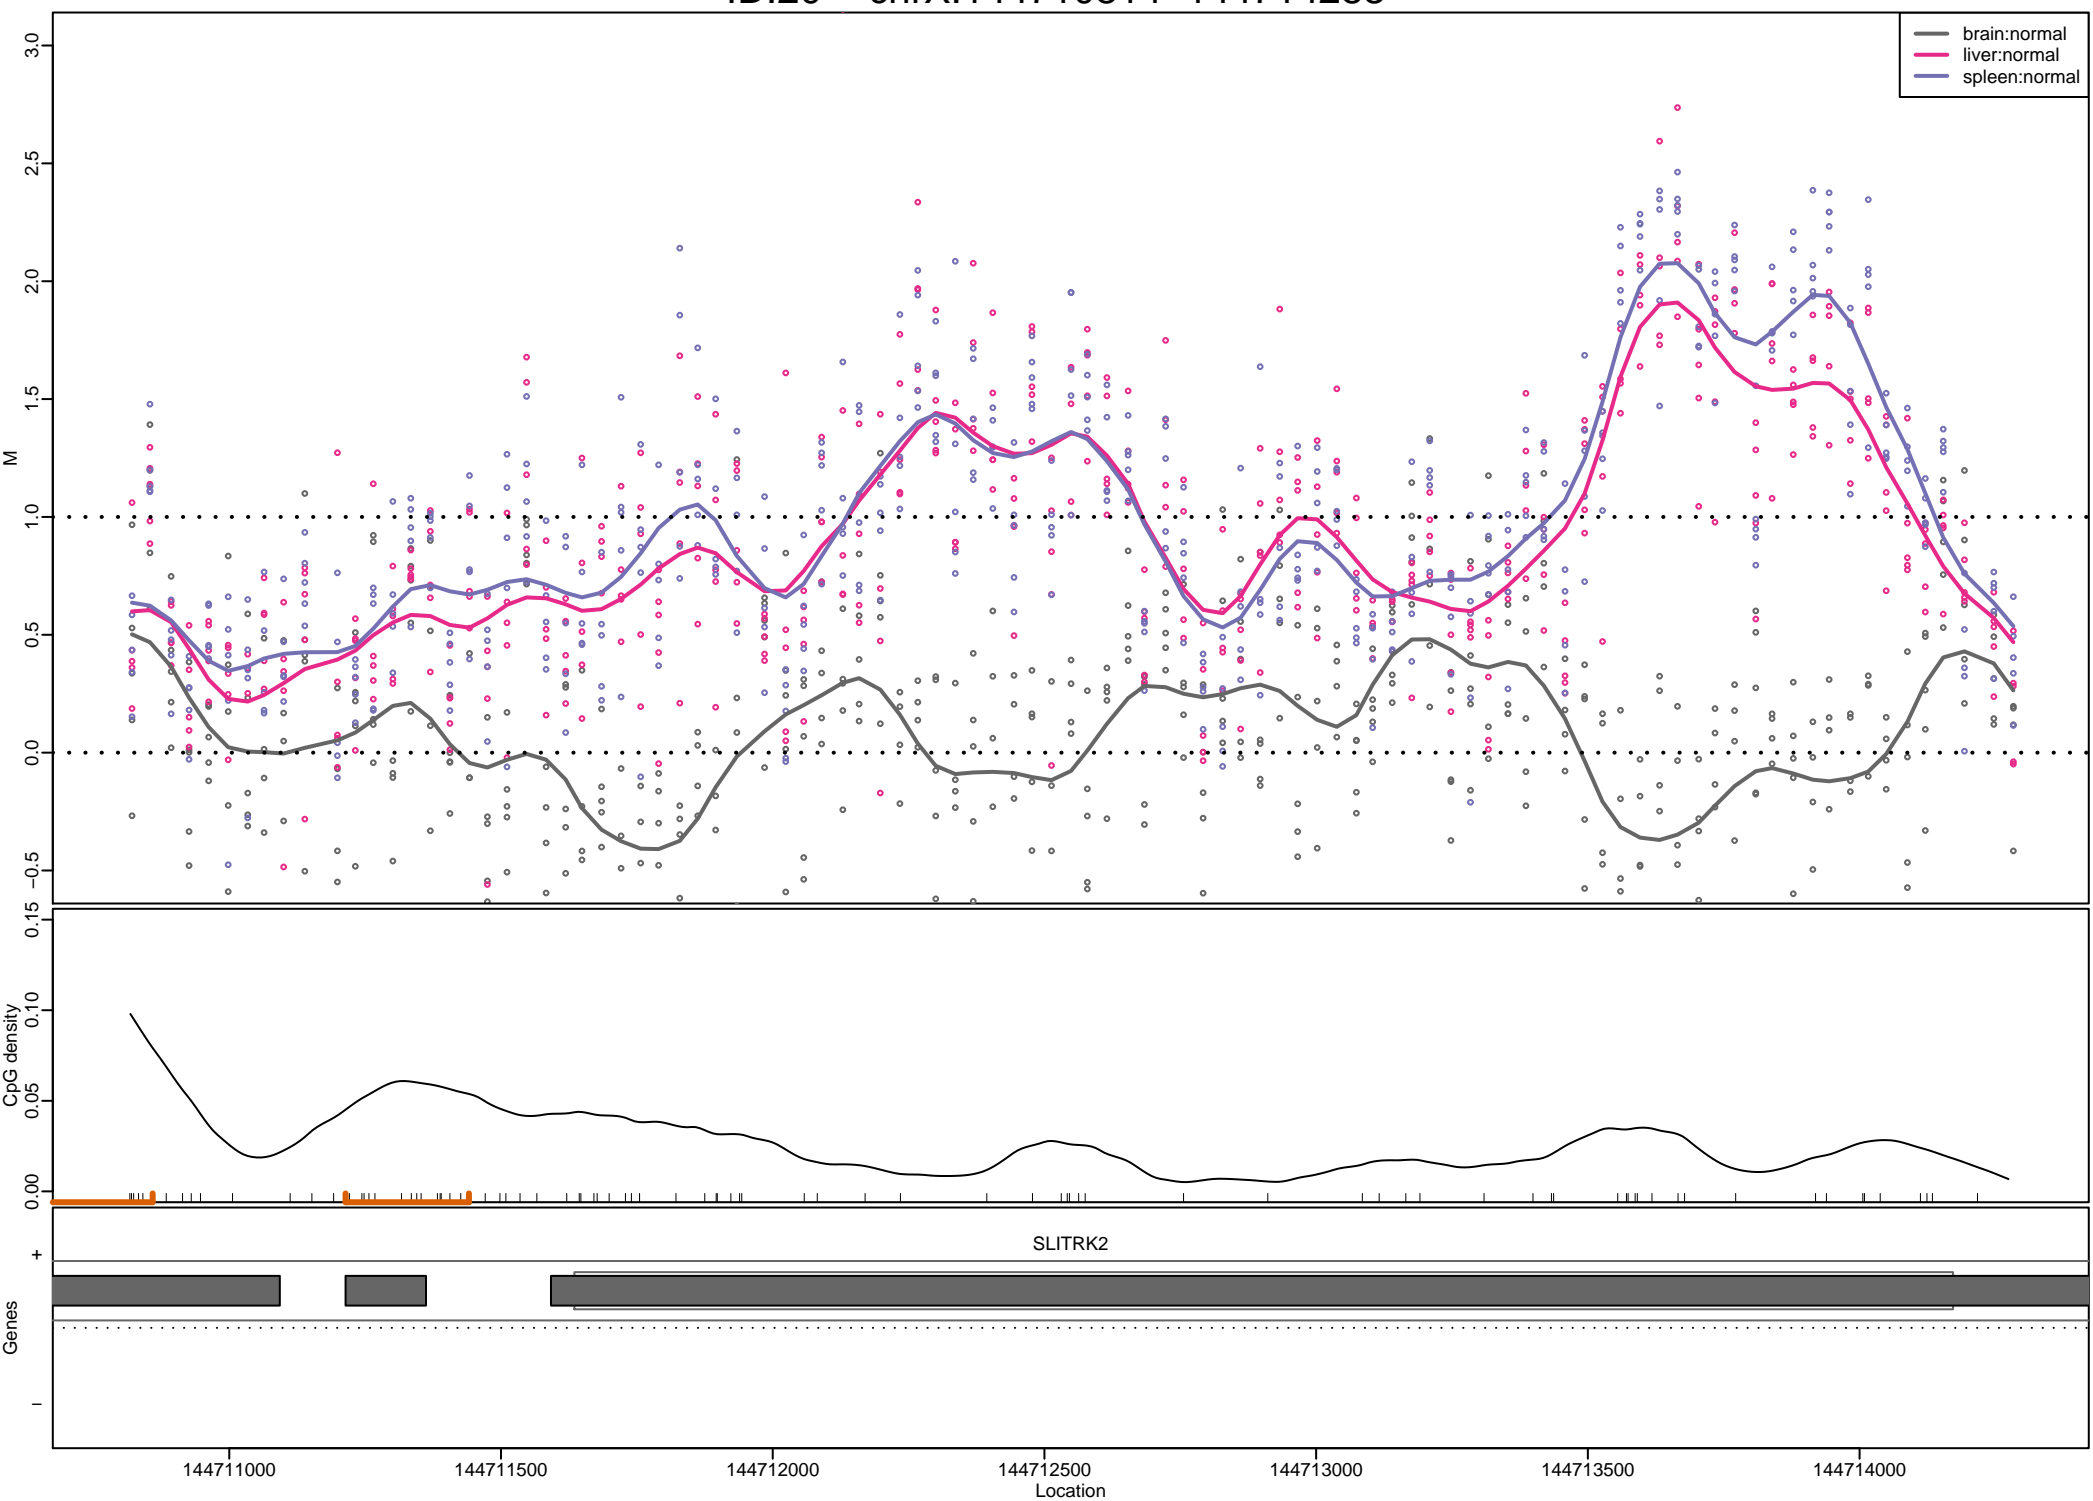

ID:21--chrX:53131580-53132111

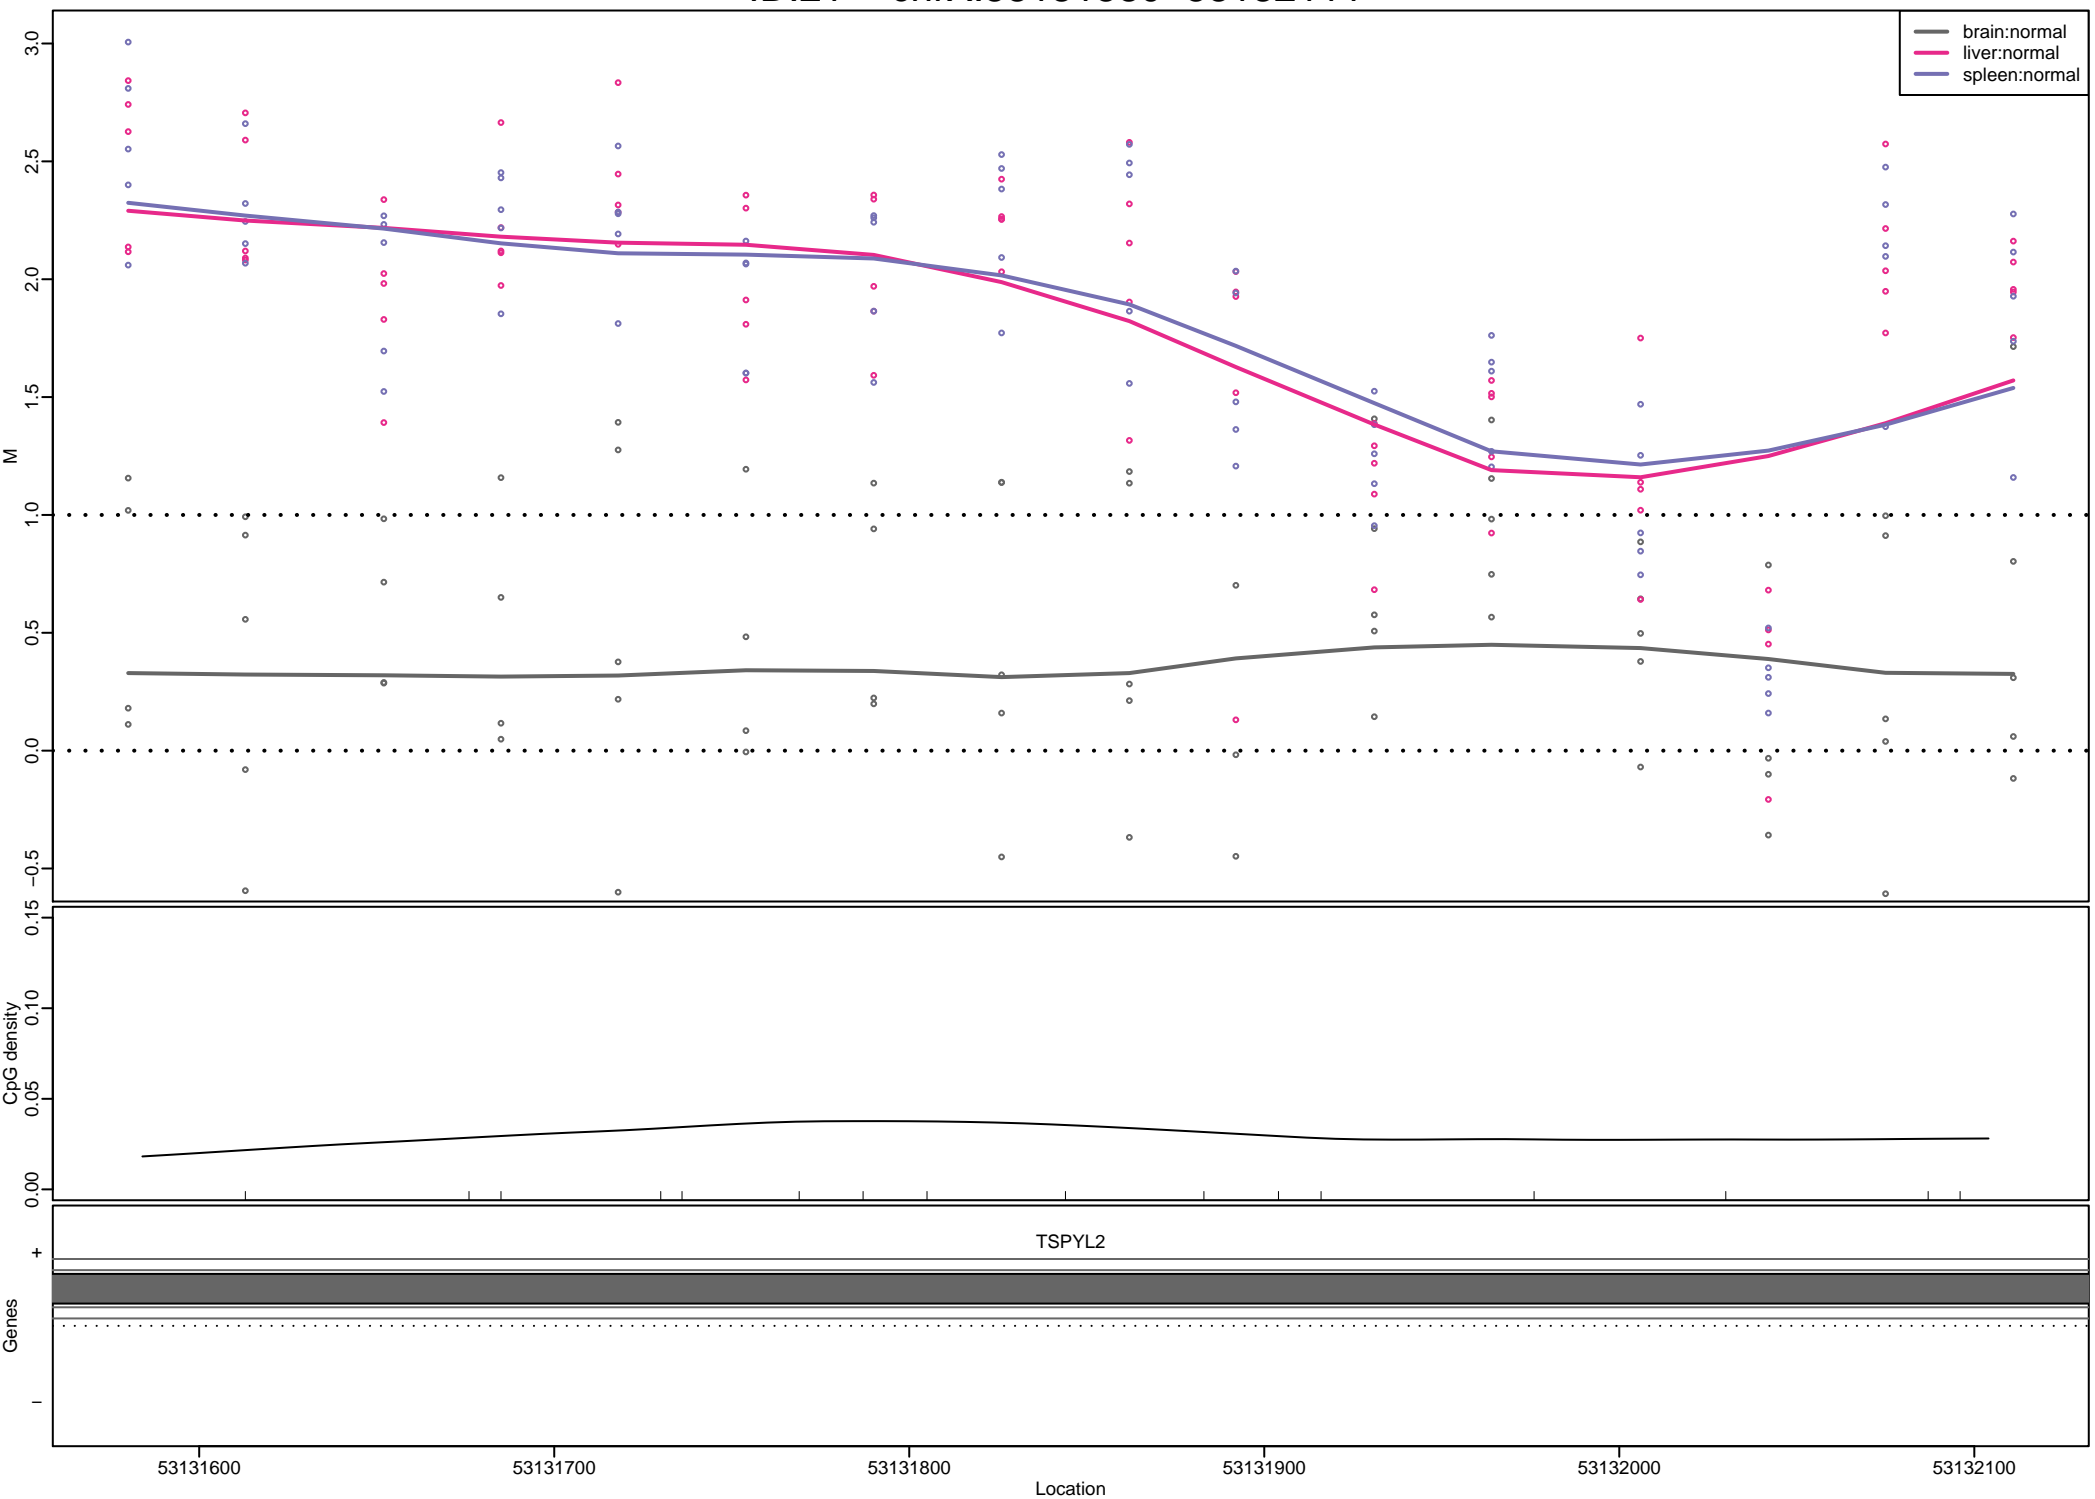

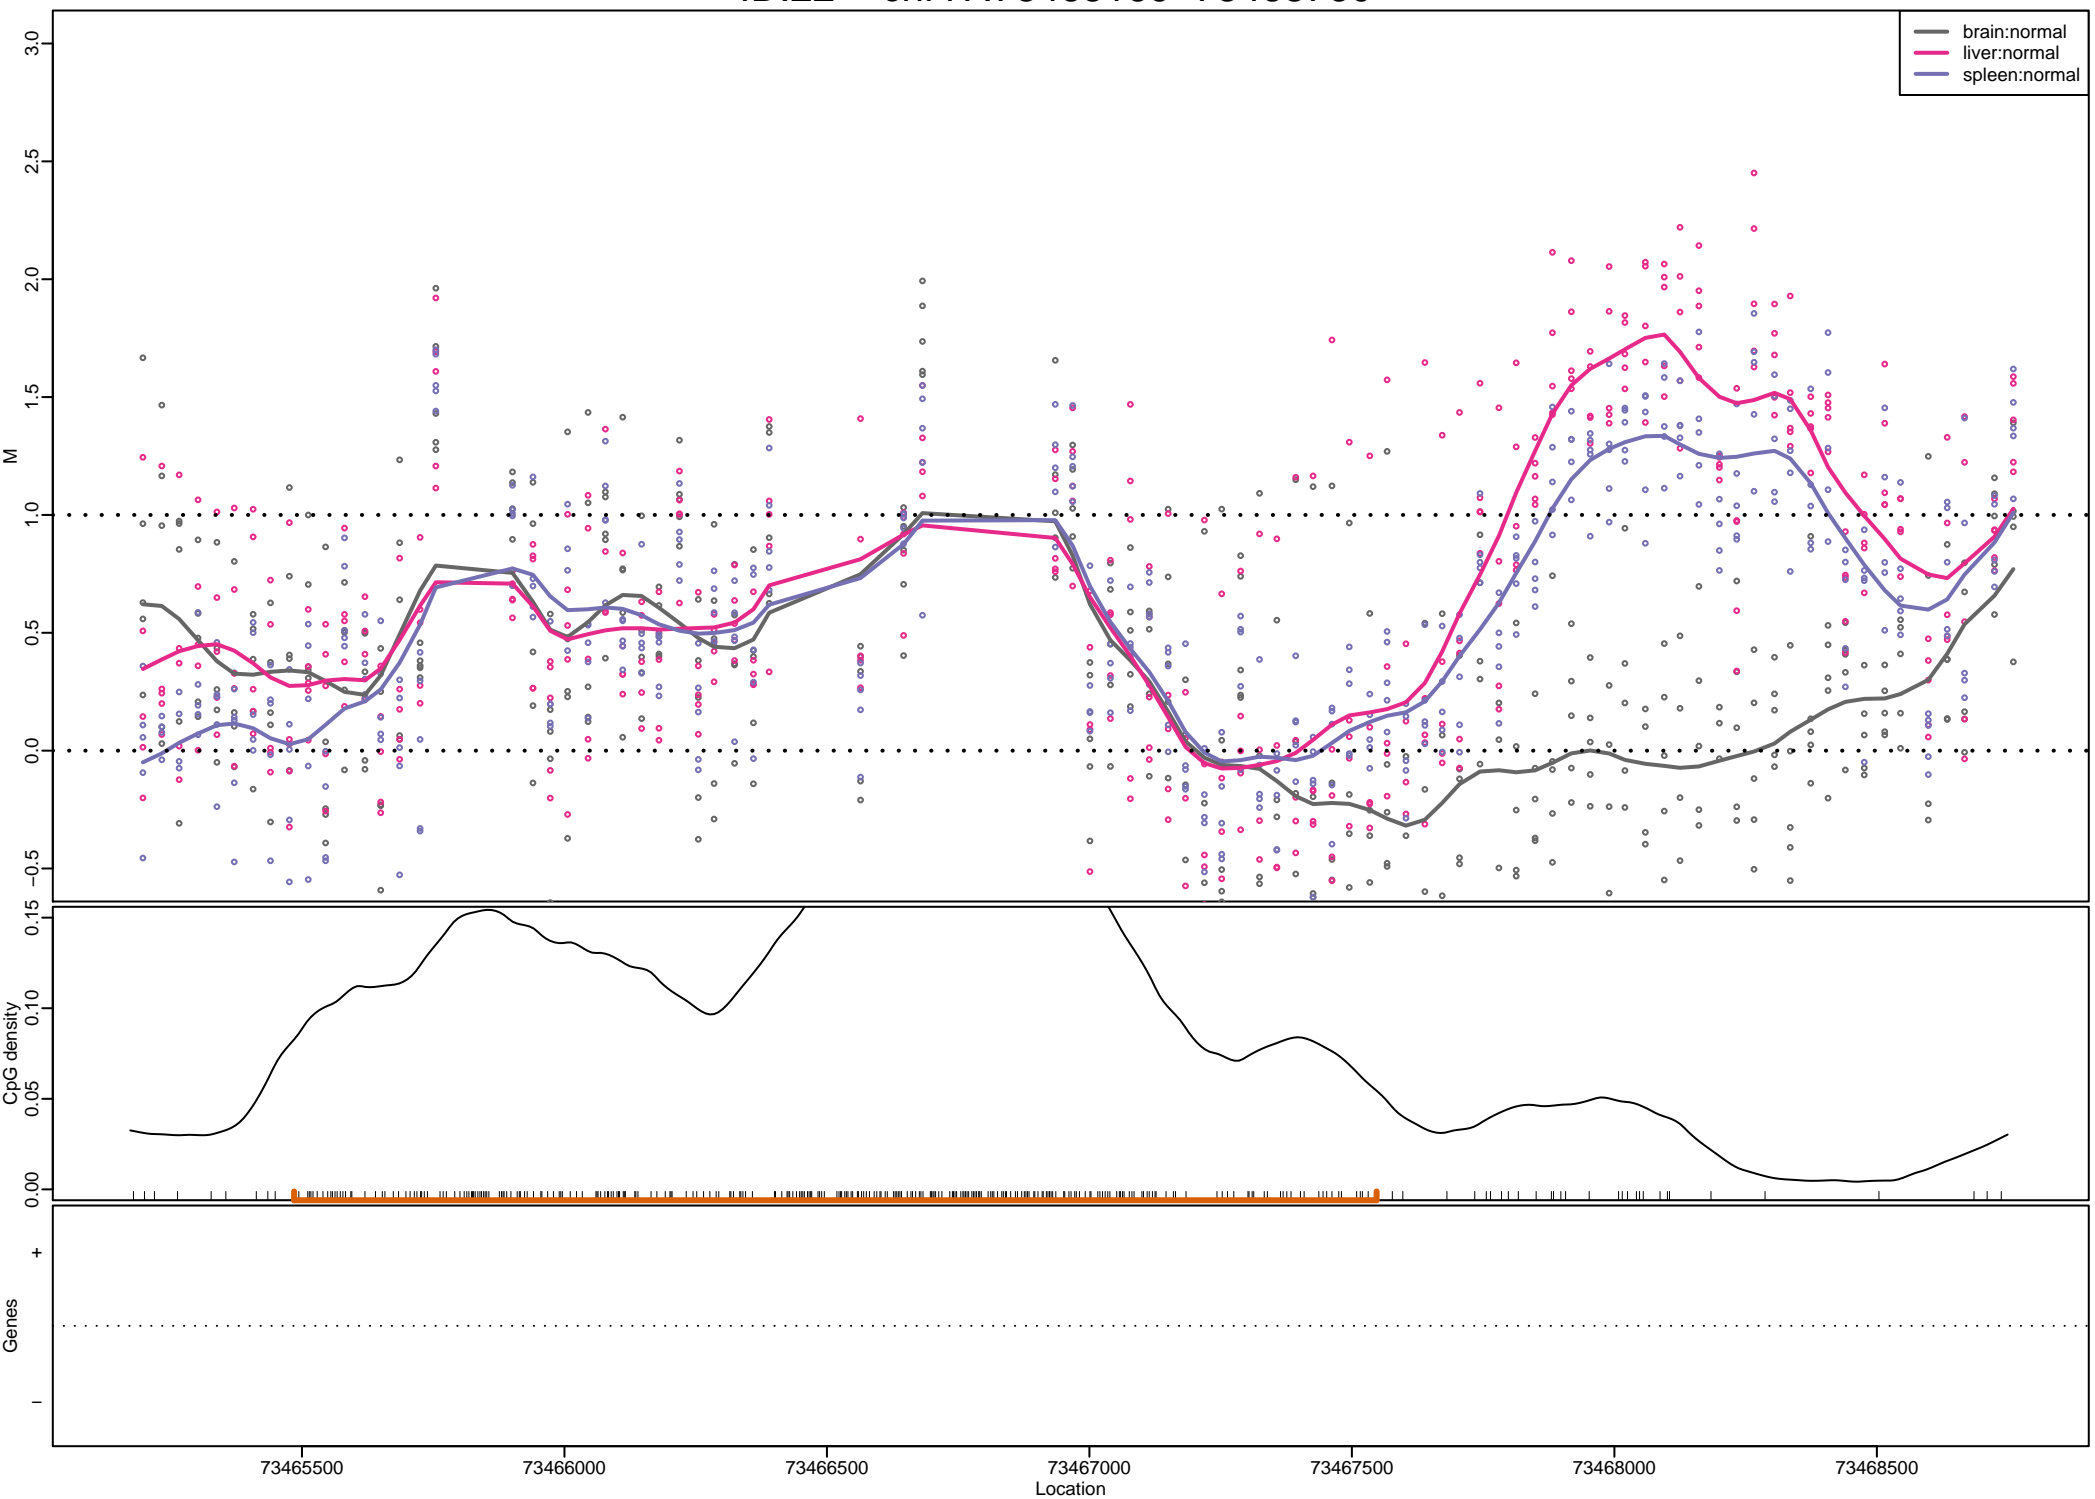

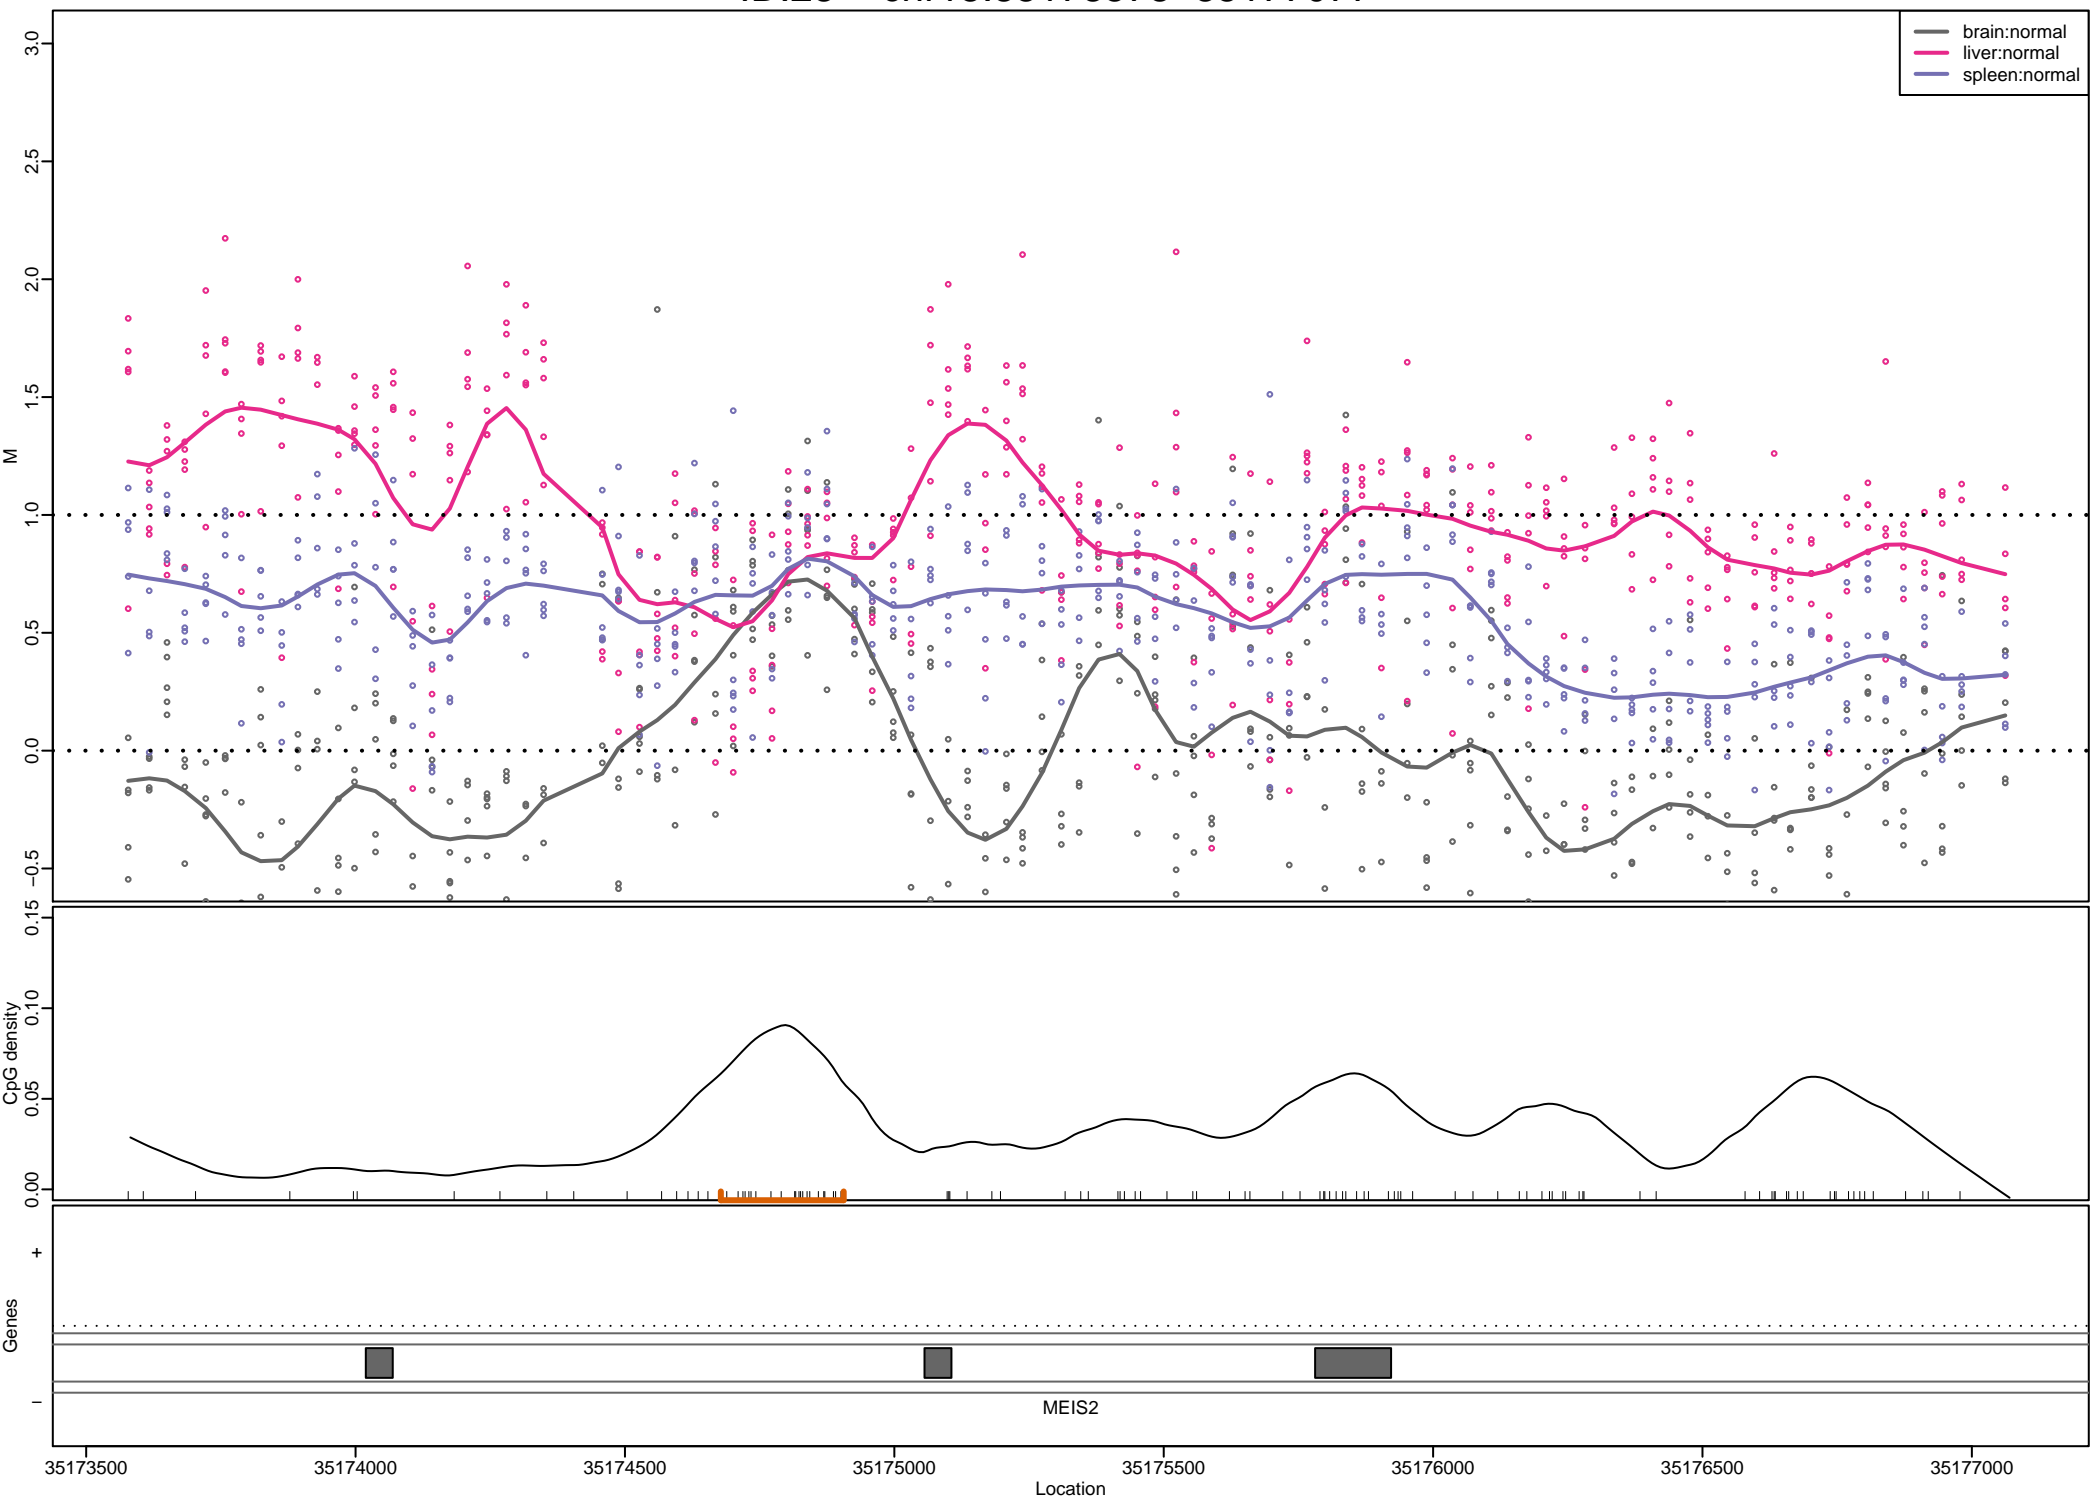

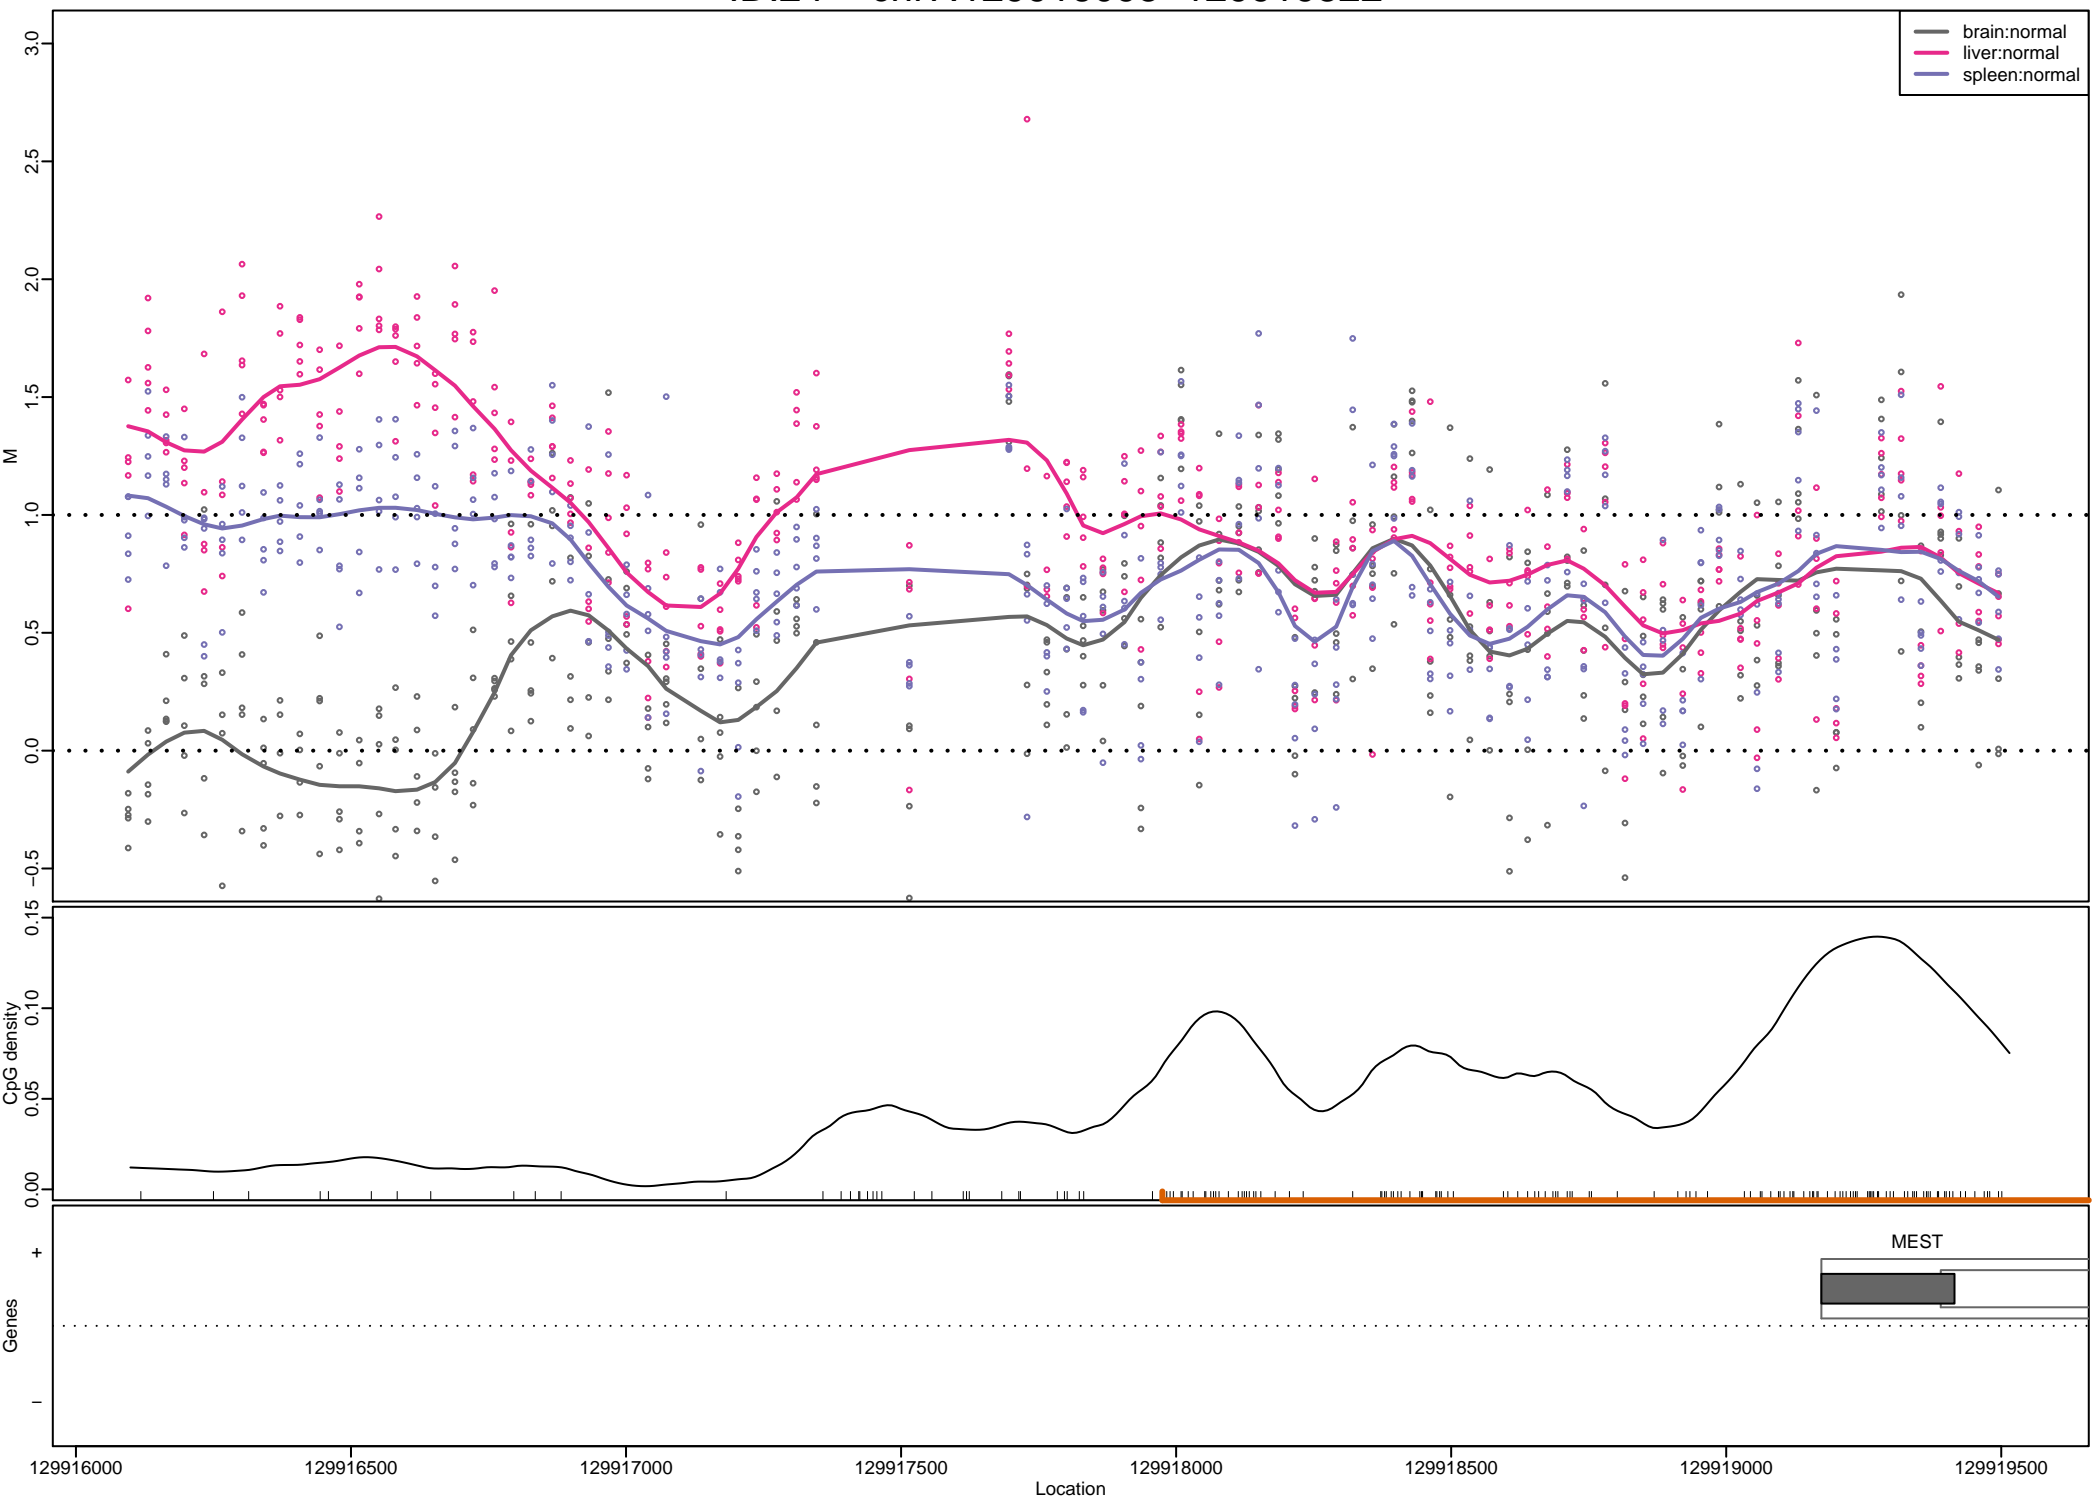

ID:25--chr1:158635897-158638704

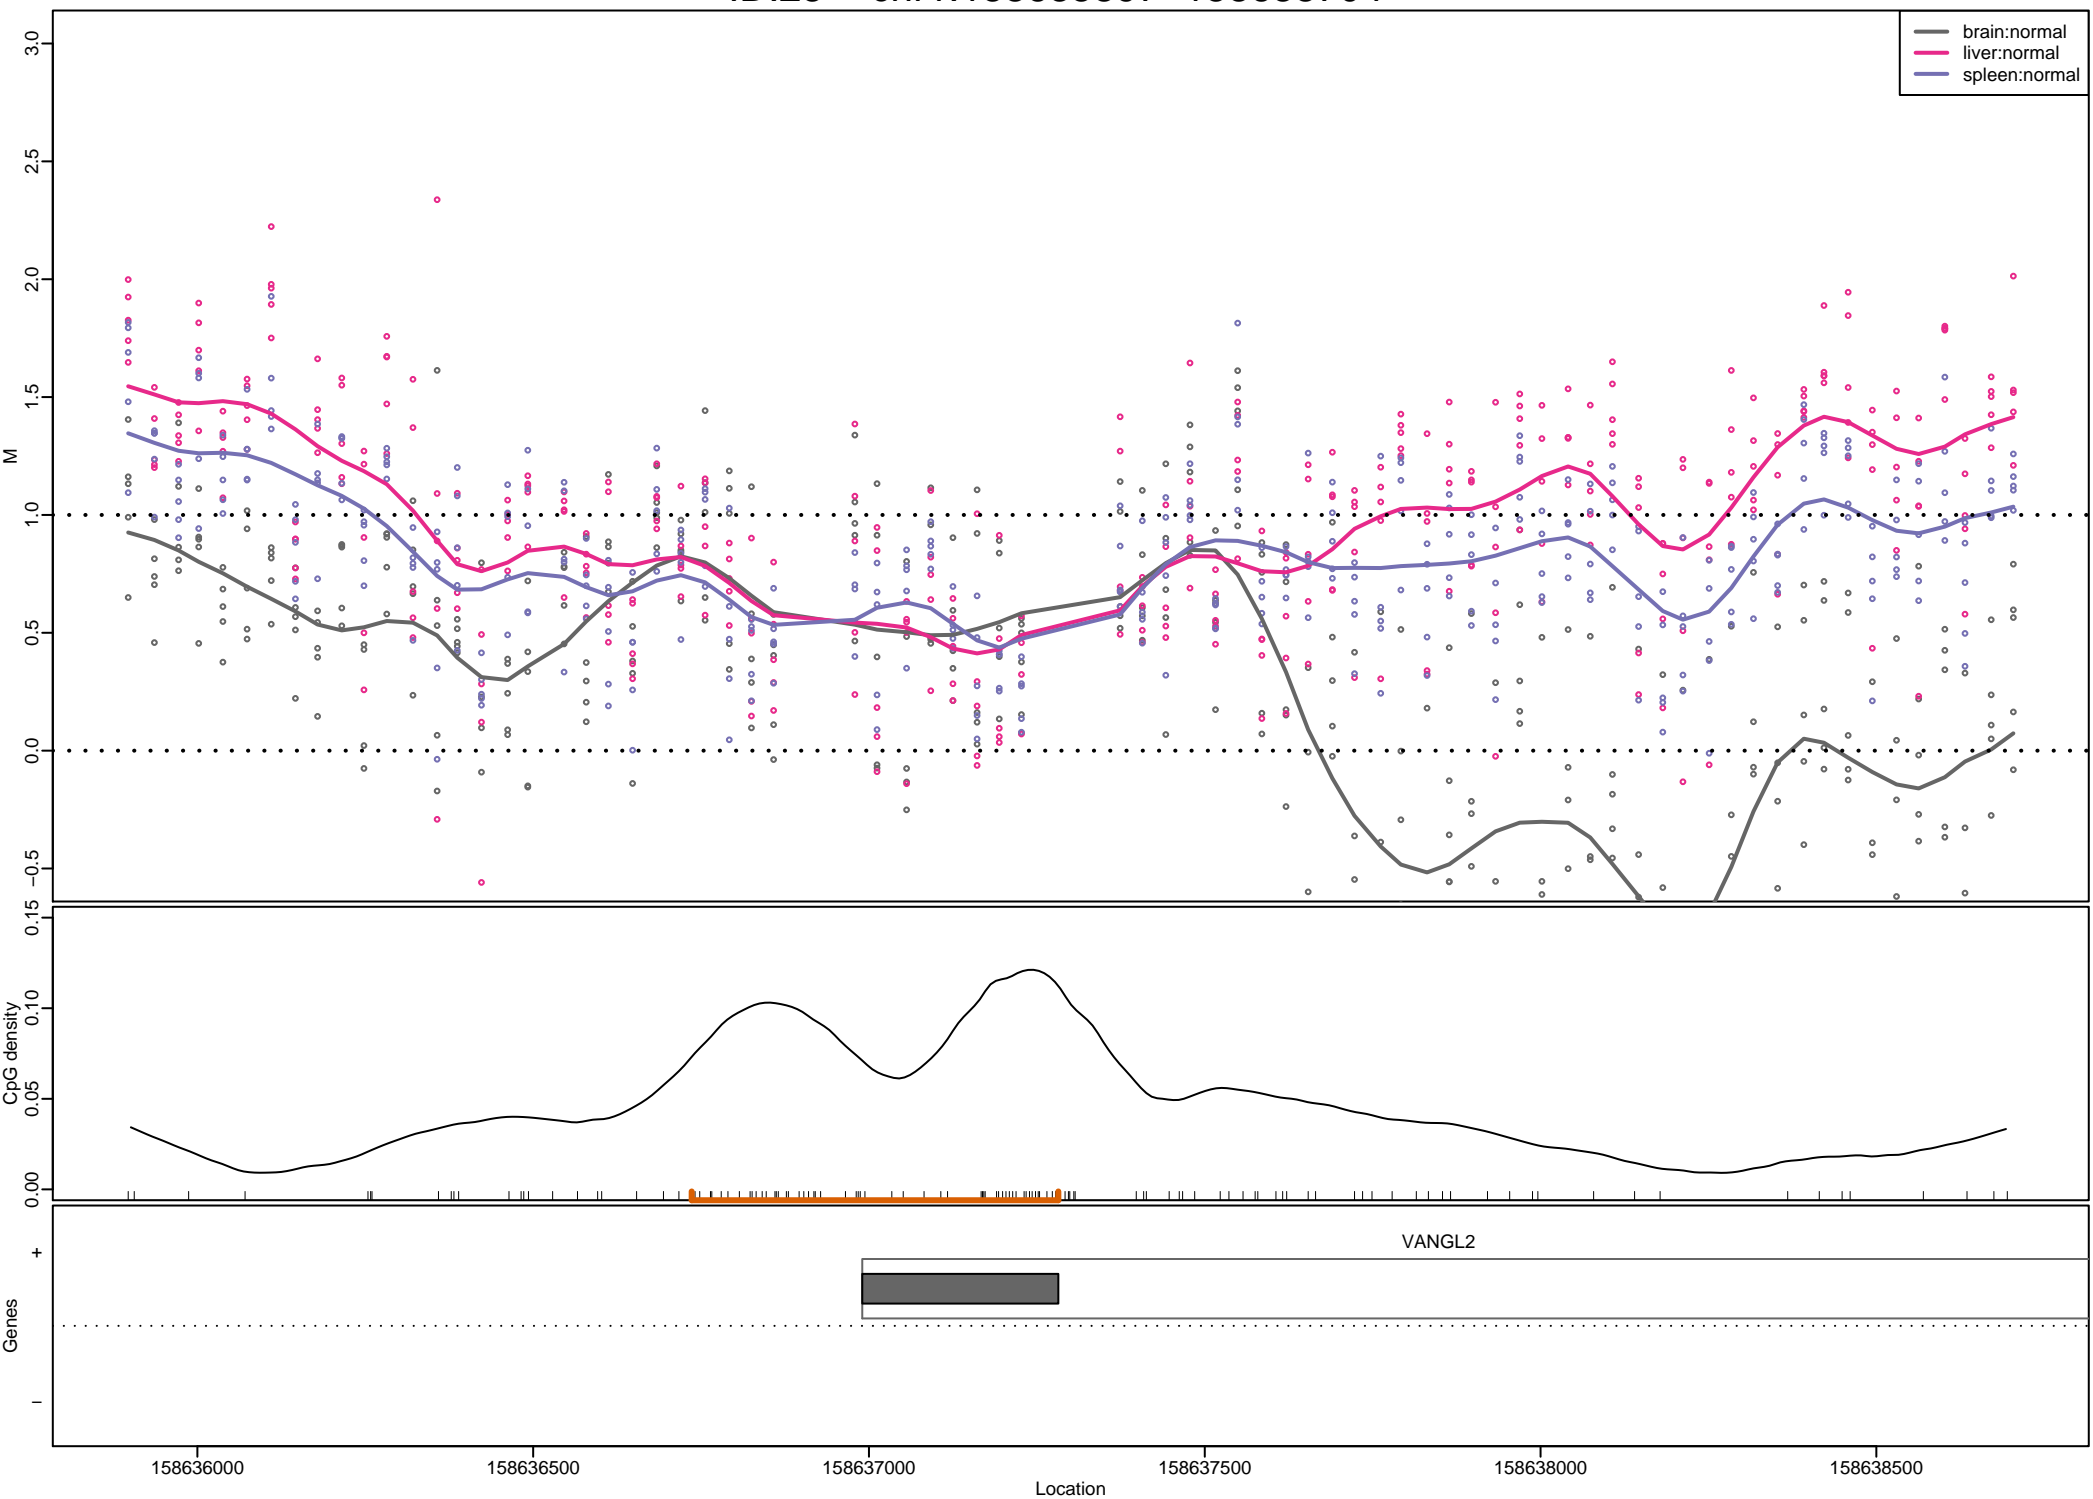

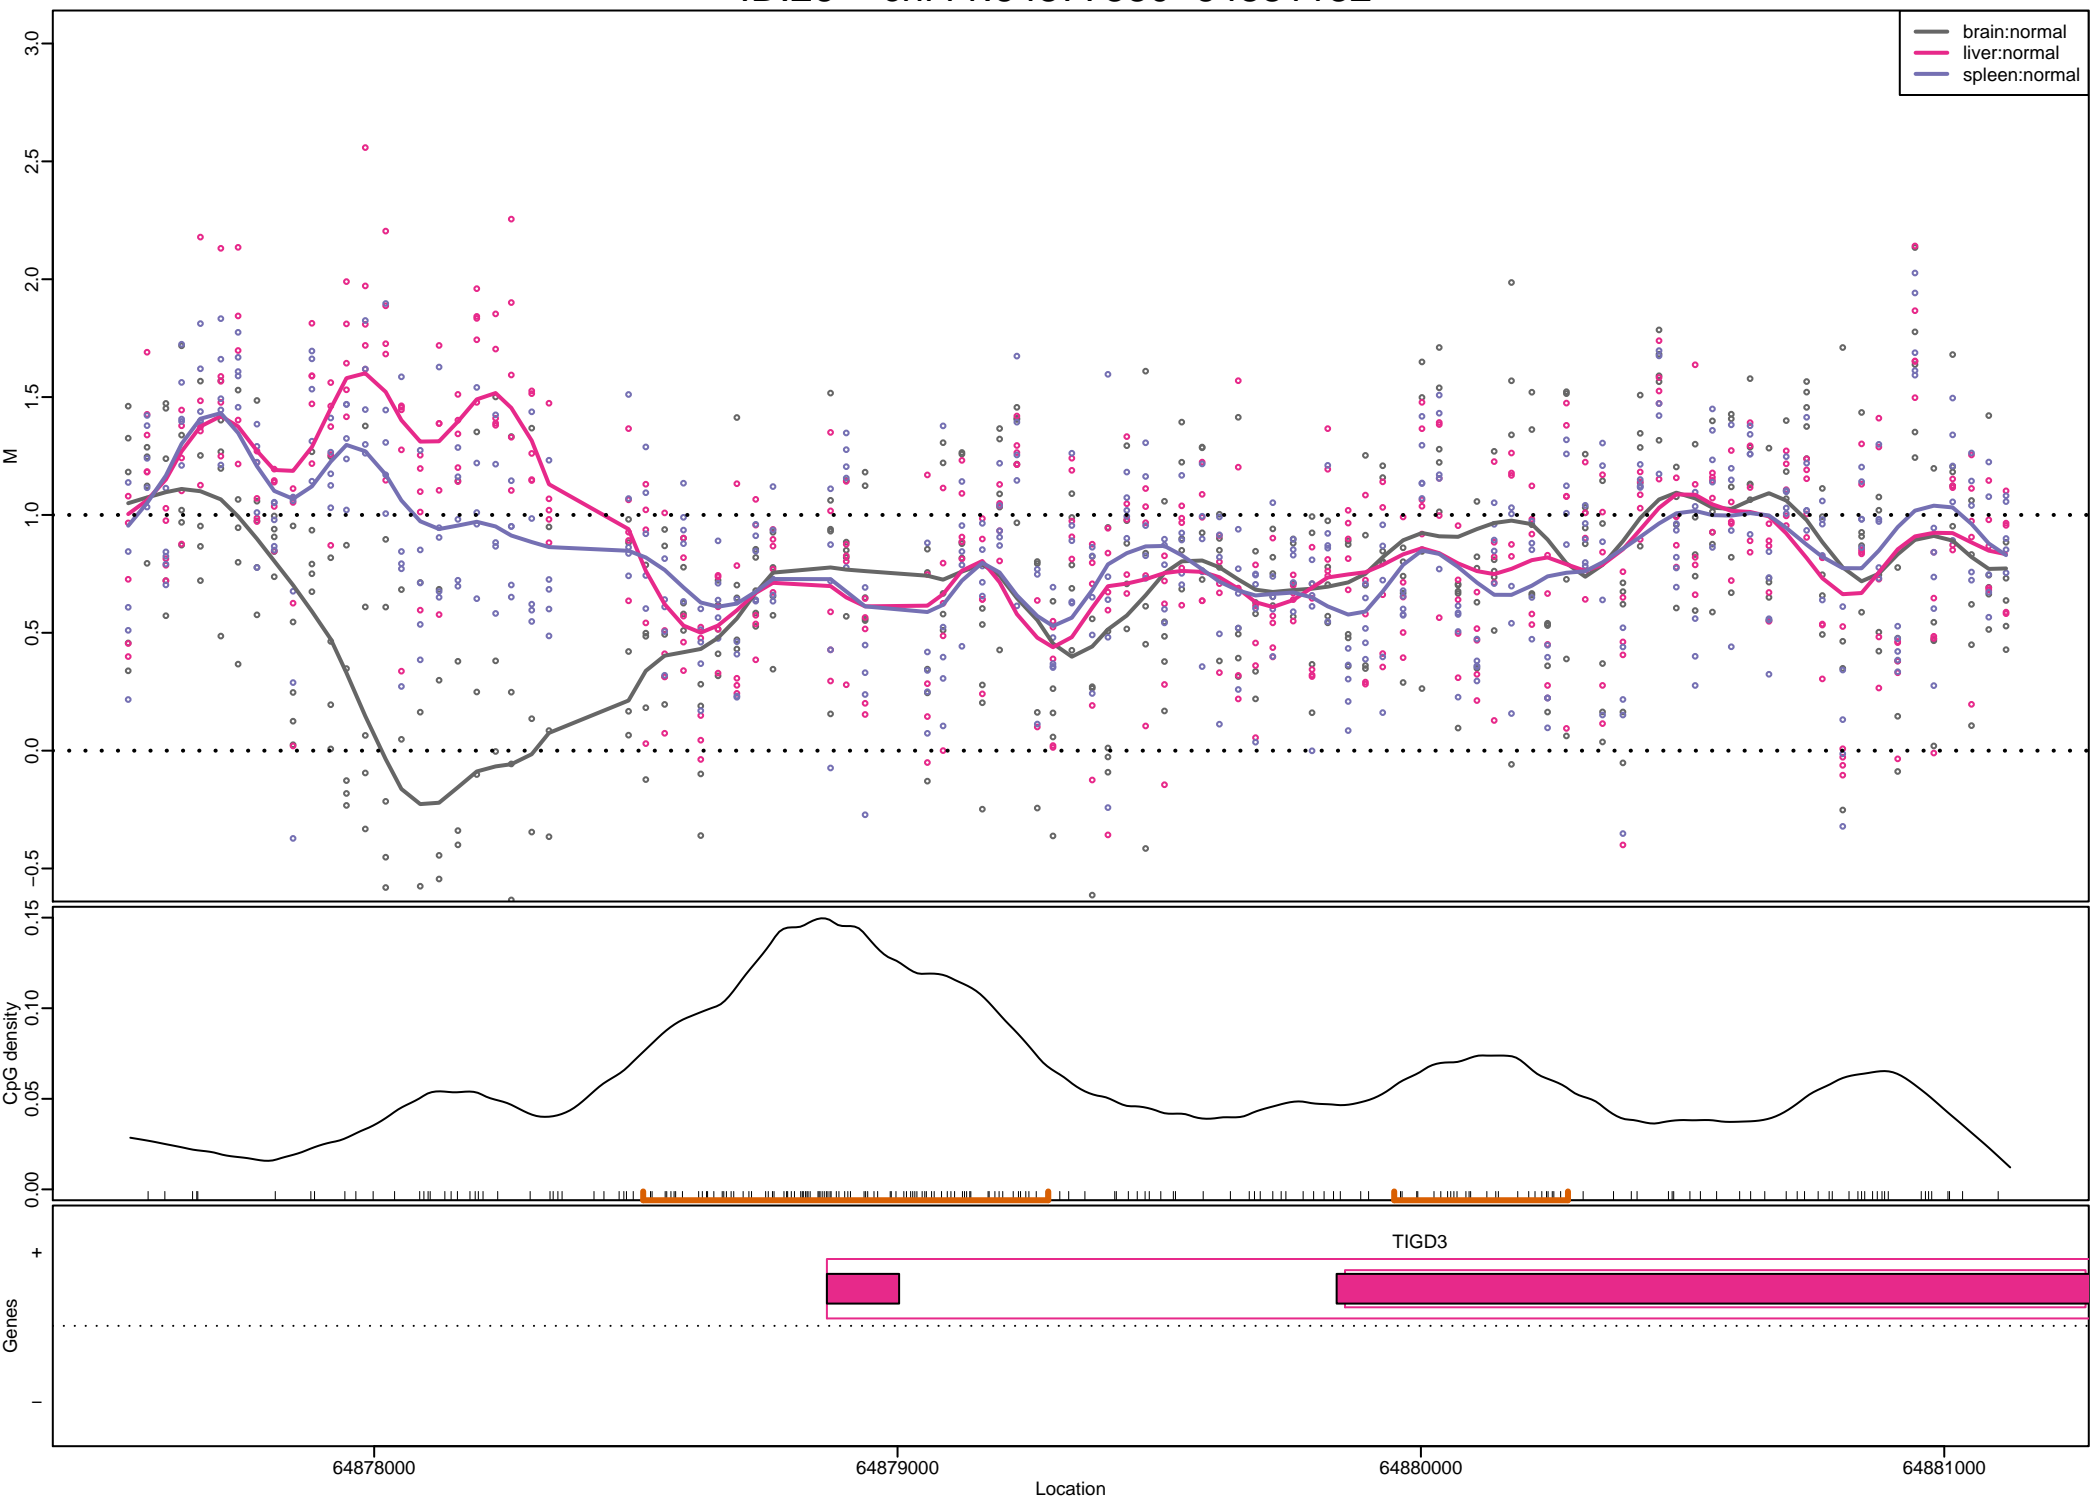

ID:27--chr6:97477919-97480669

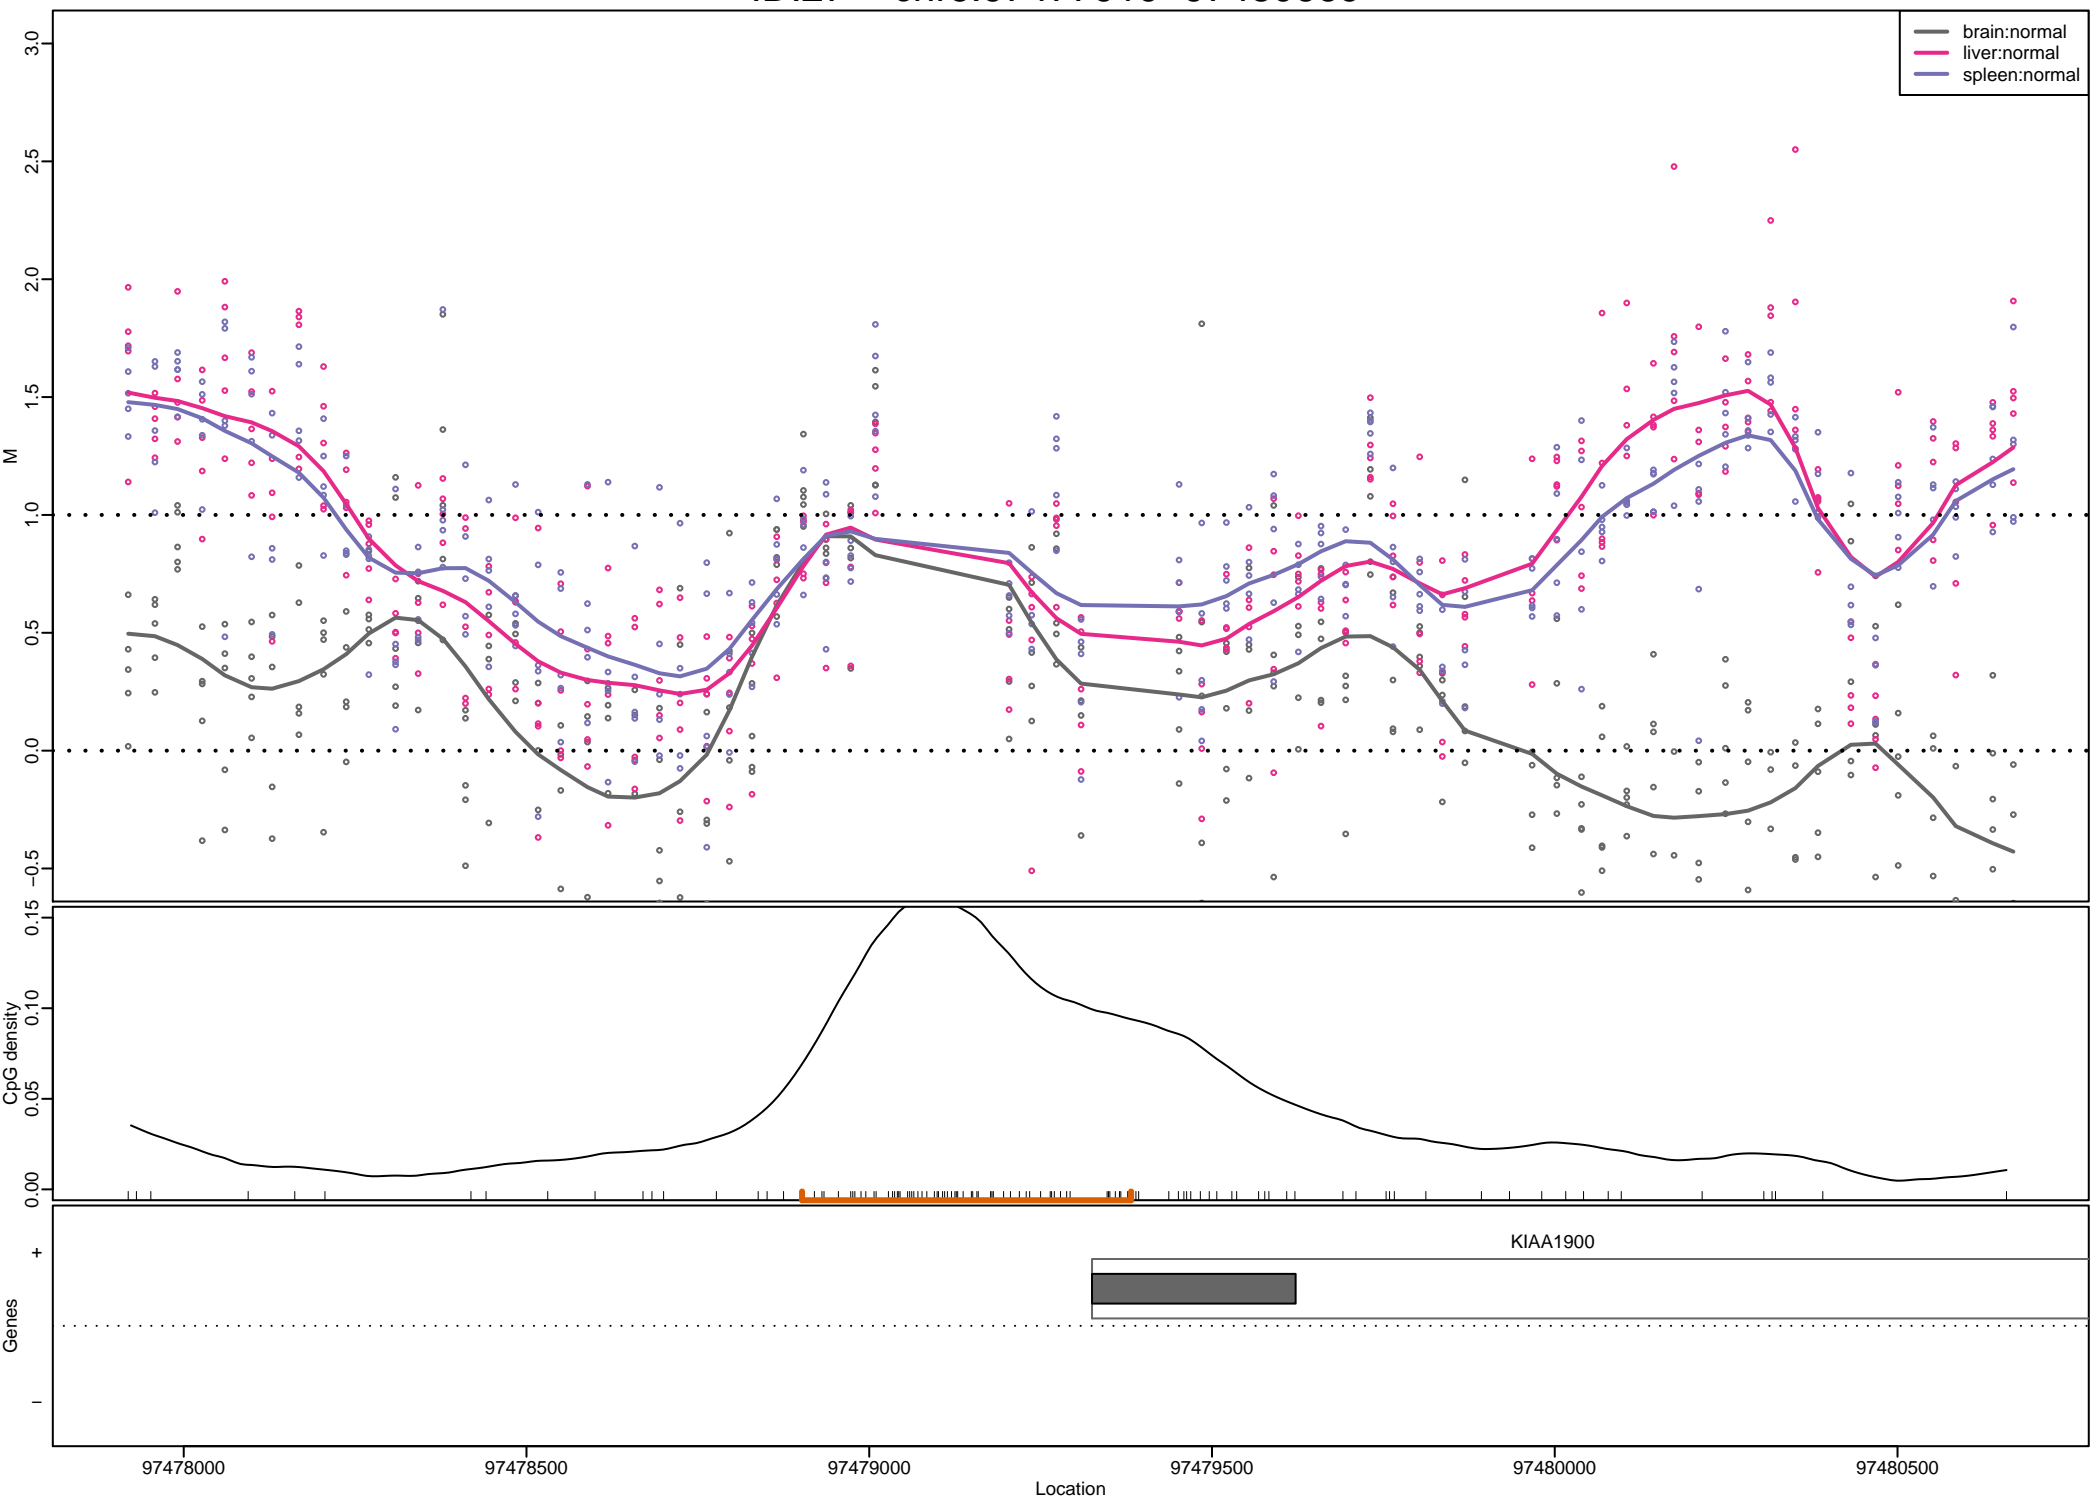

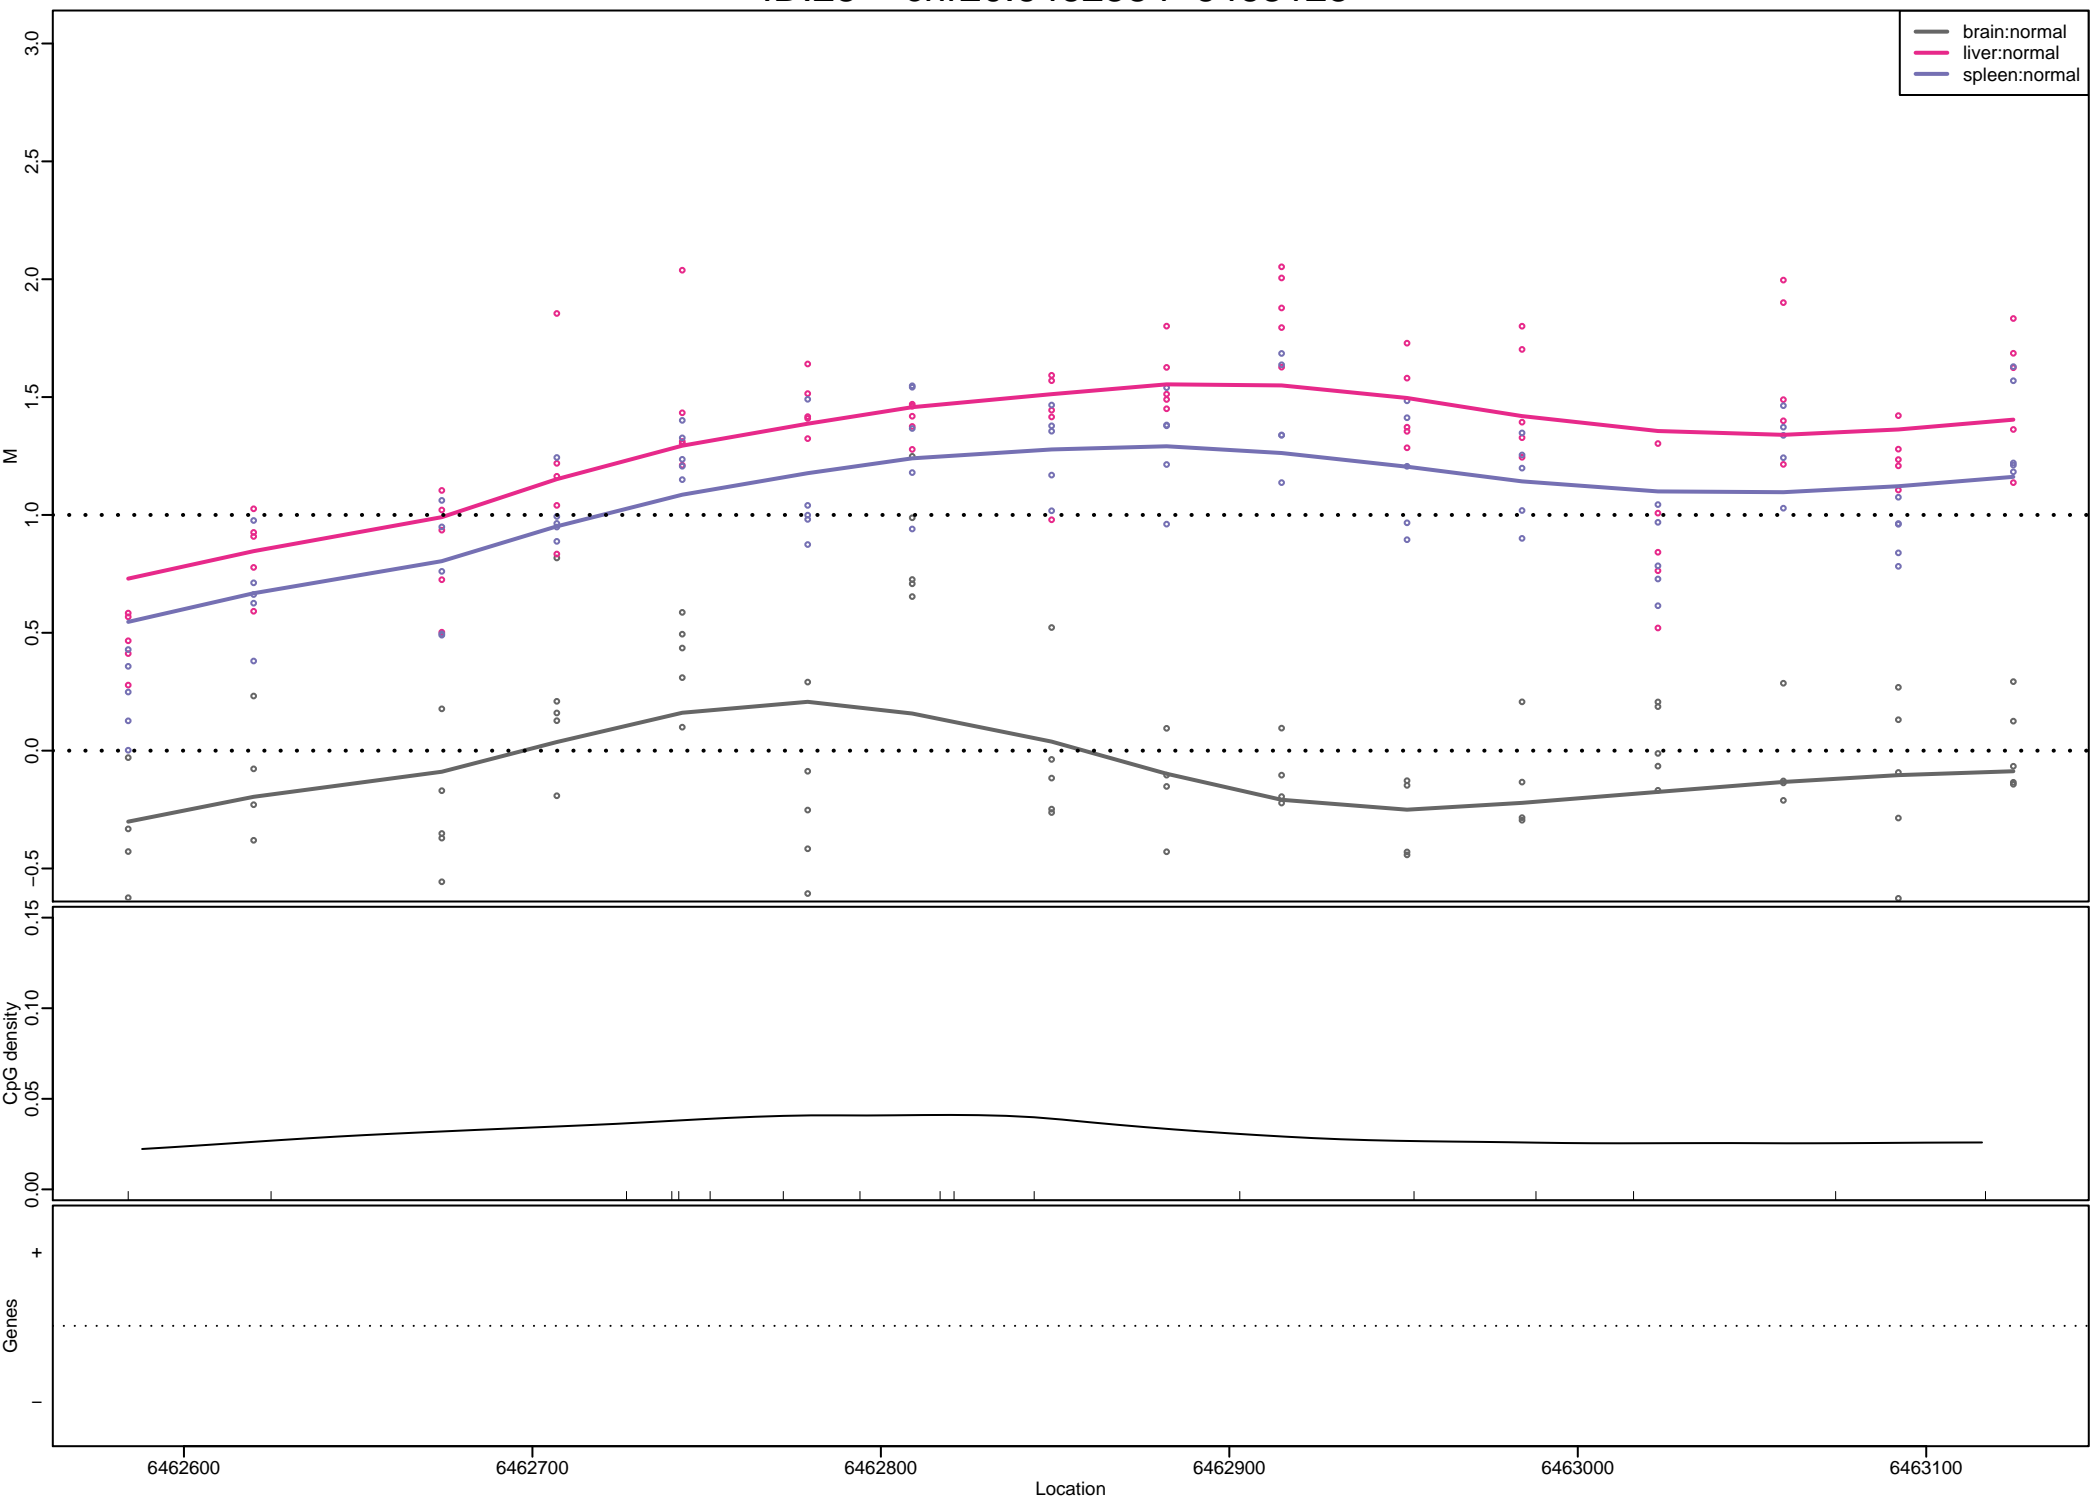

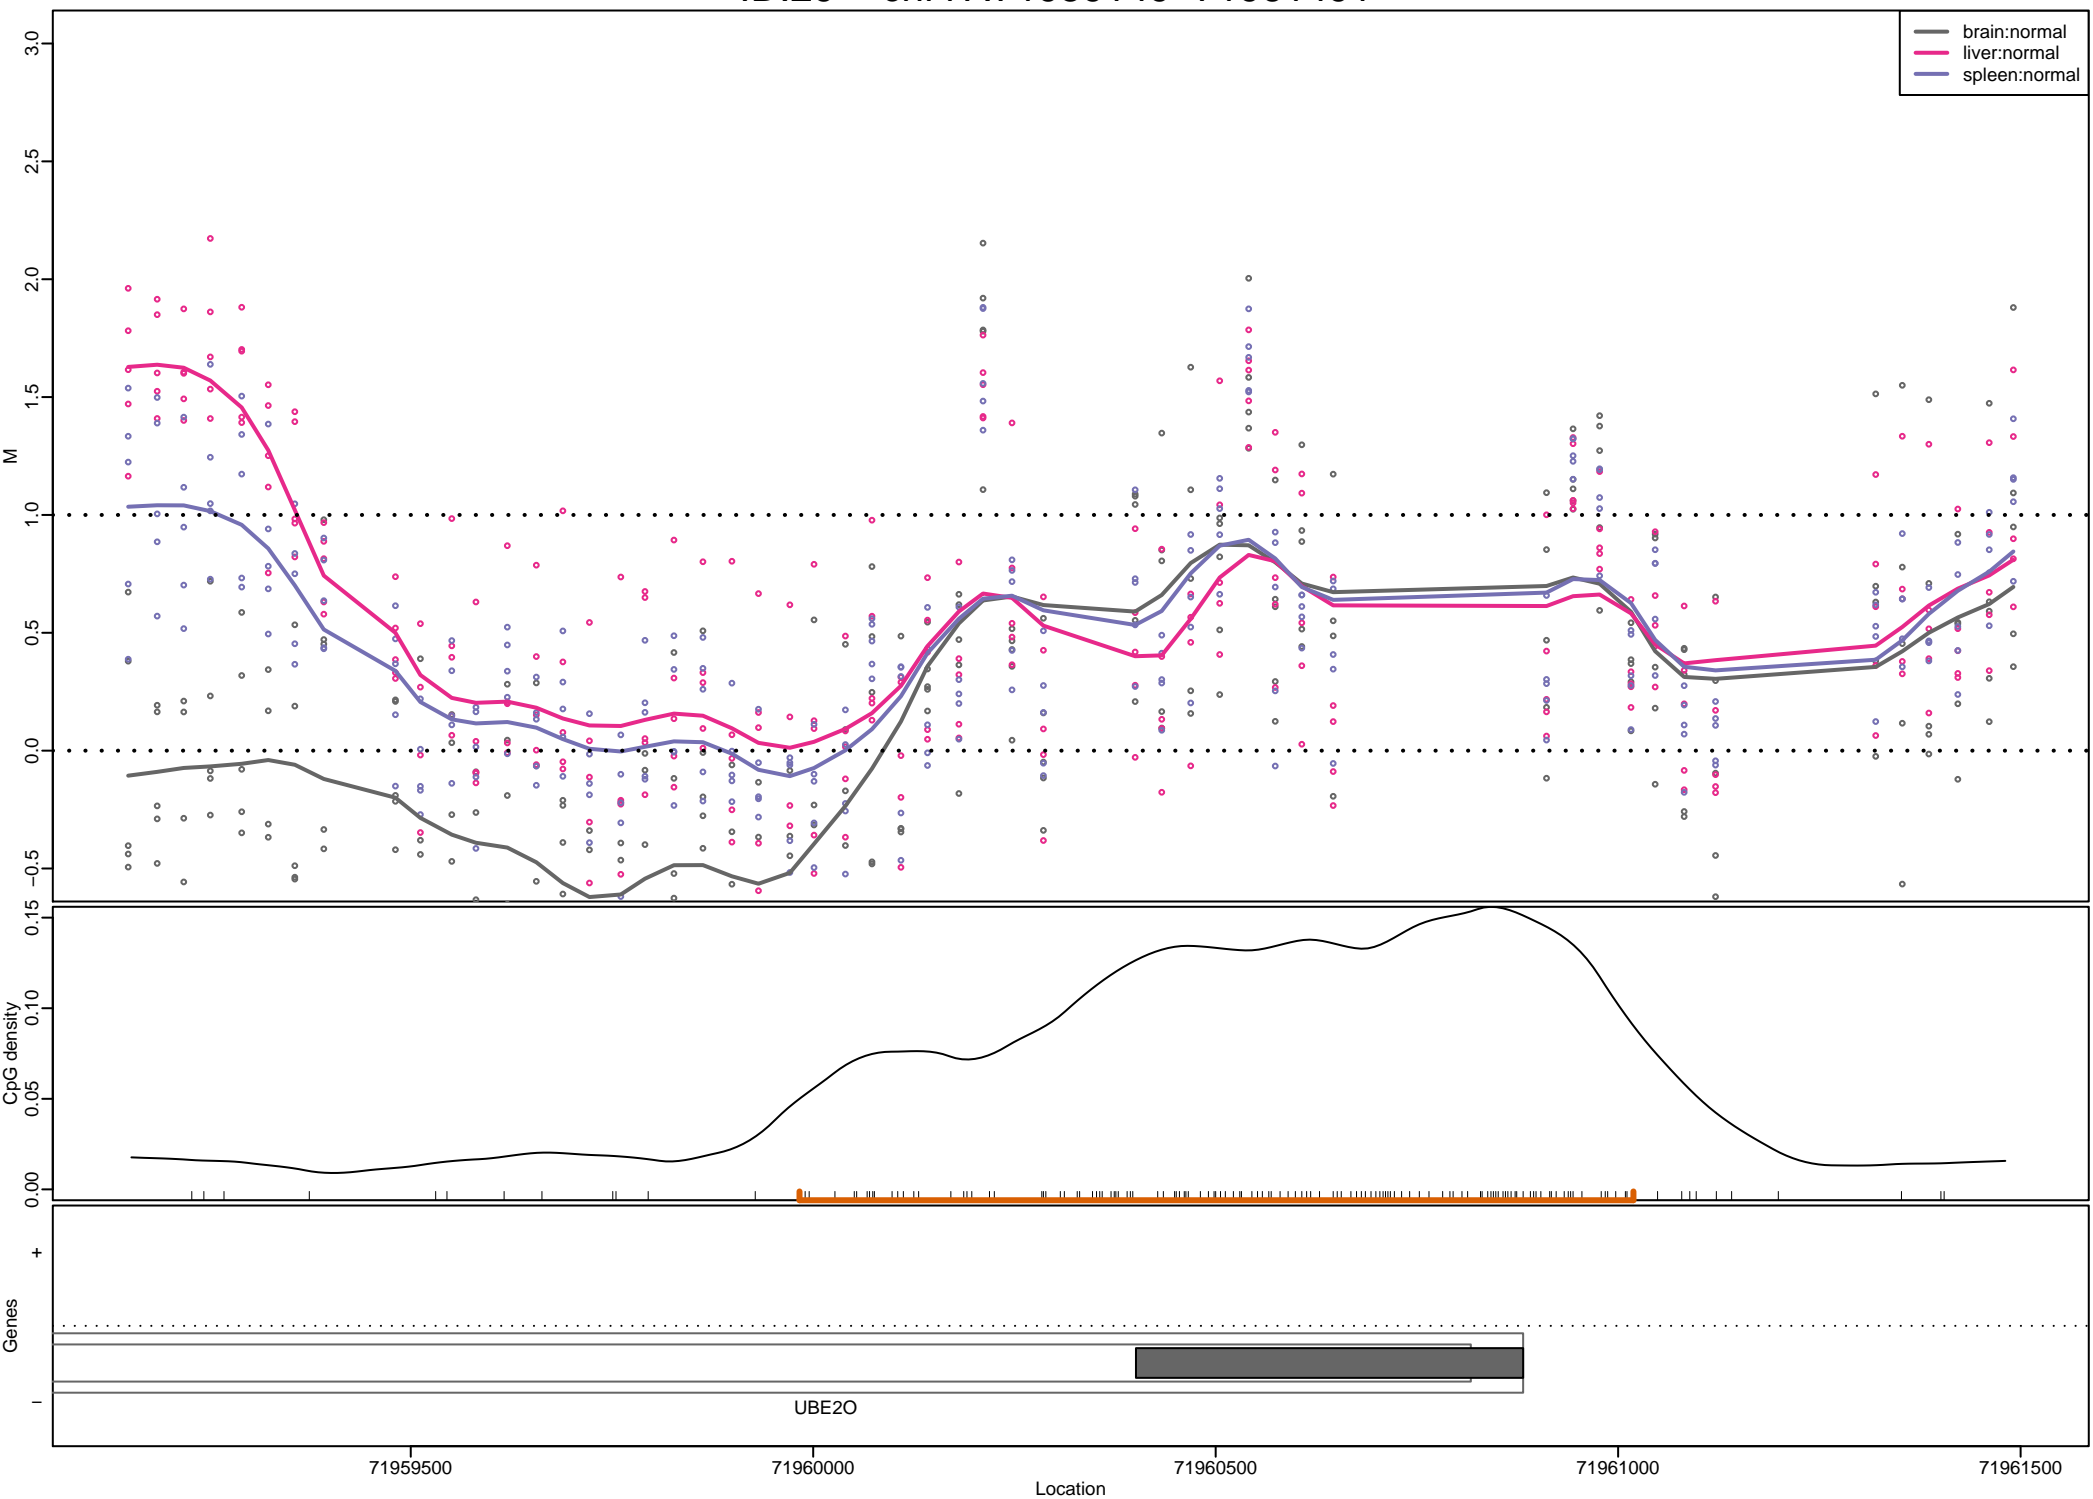

ID:30--chr17:35471633-35476076

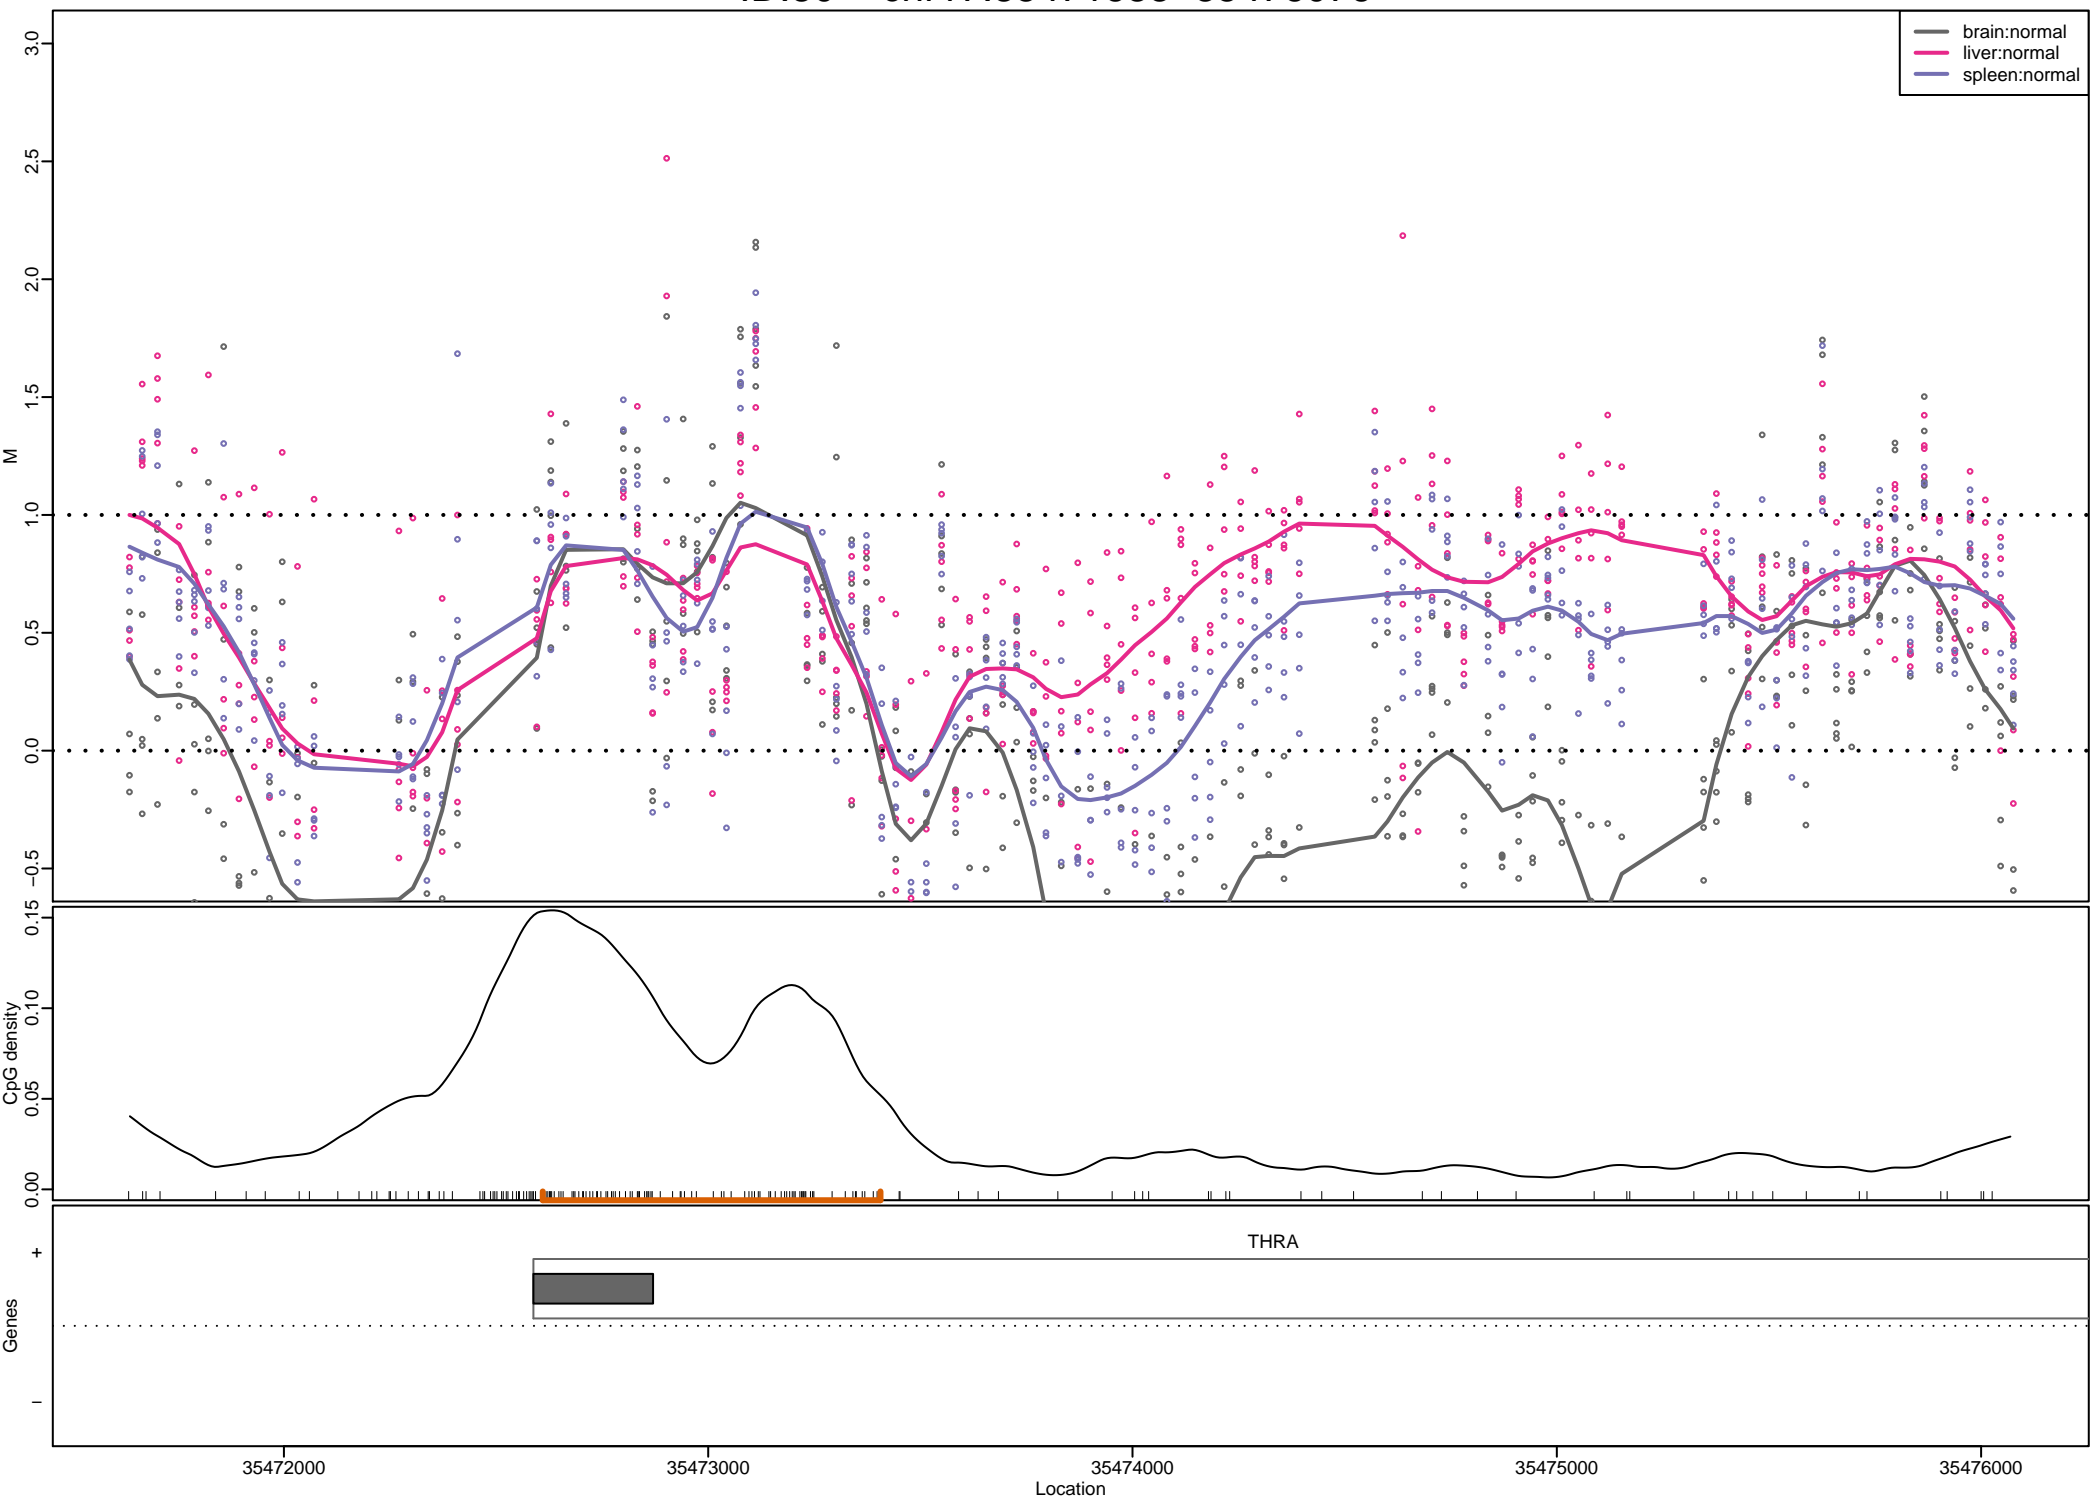

ID:31--chr7:130438711-130442831

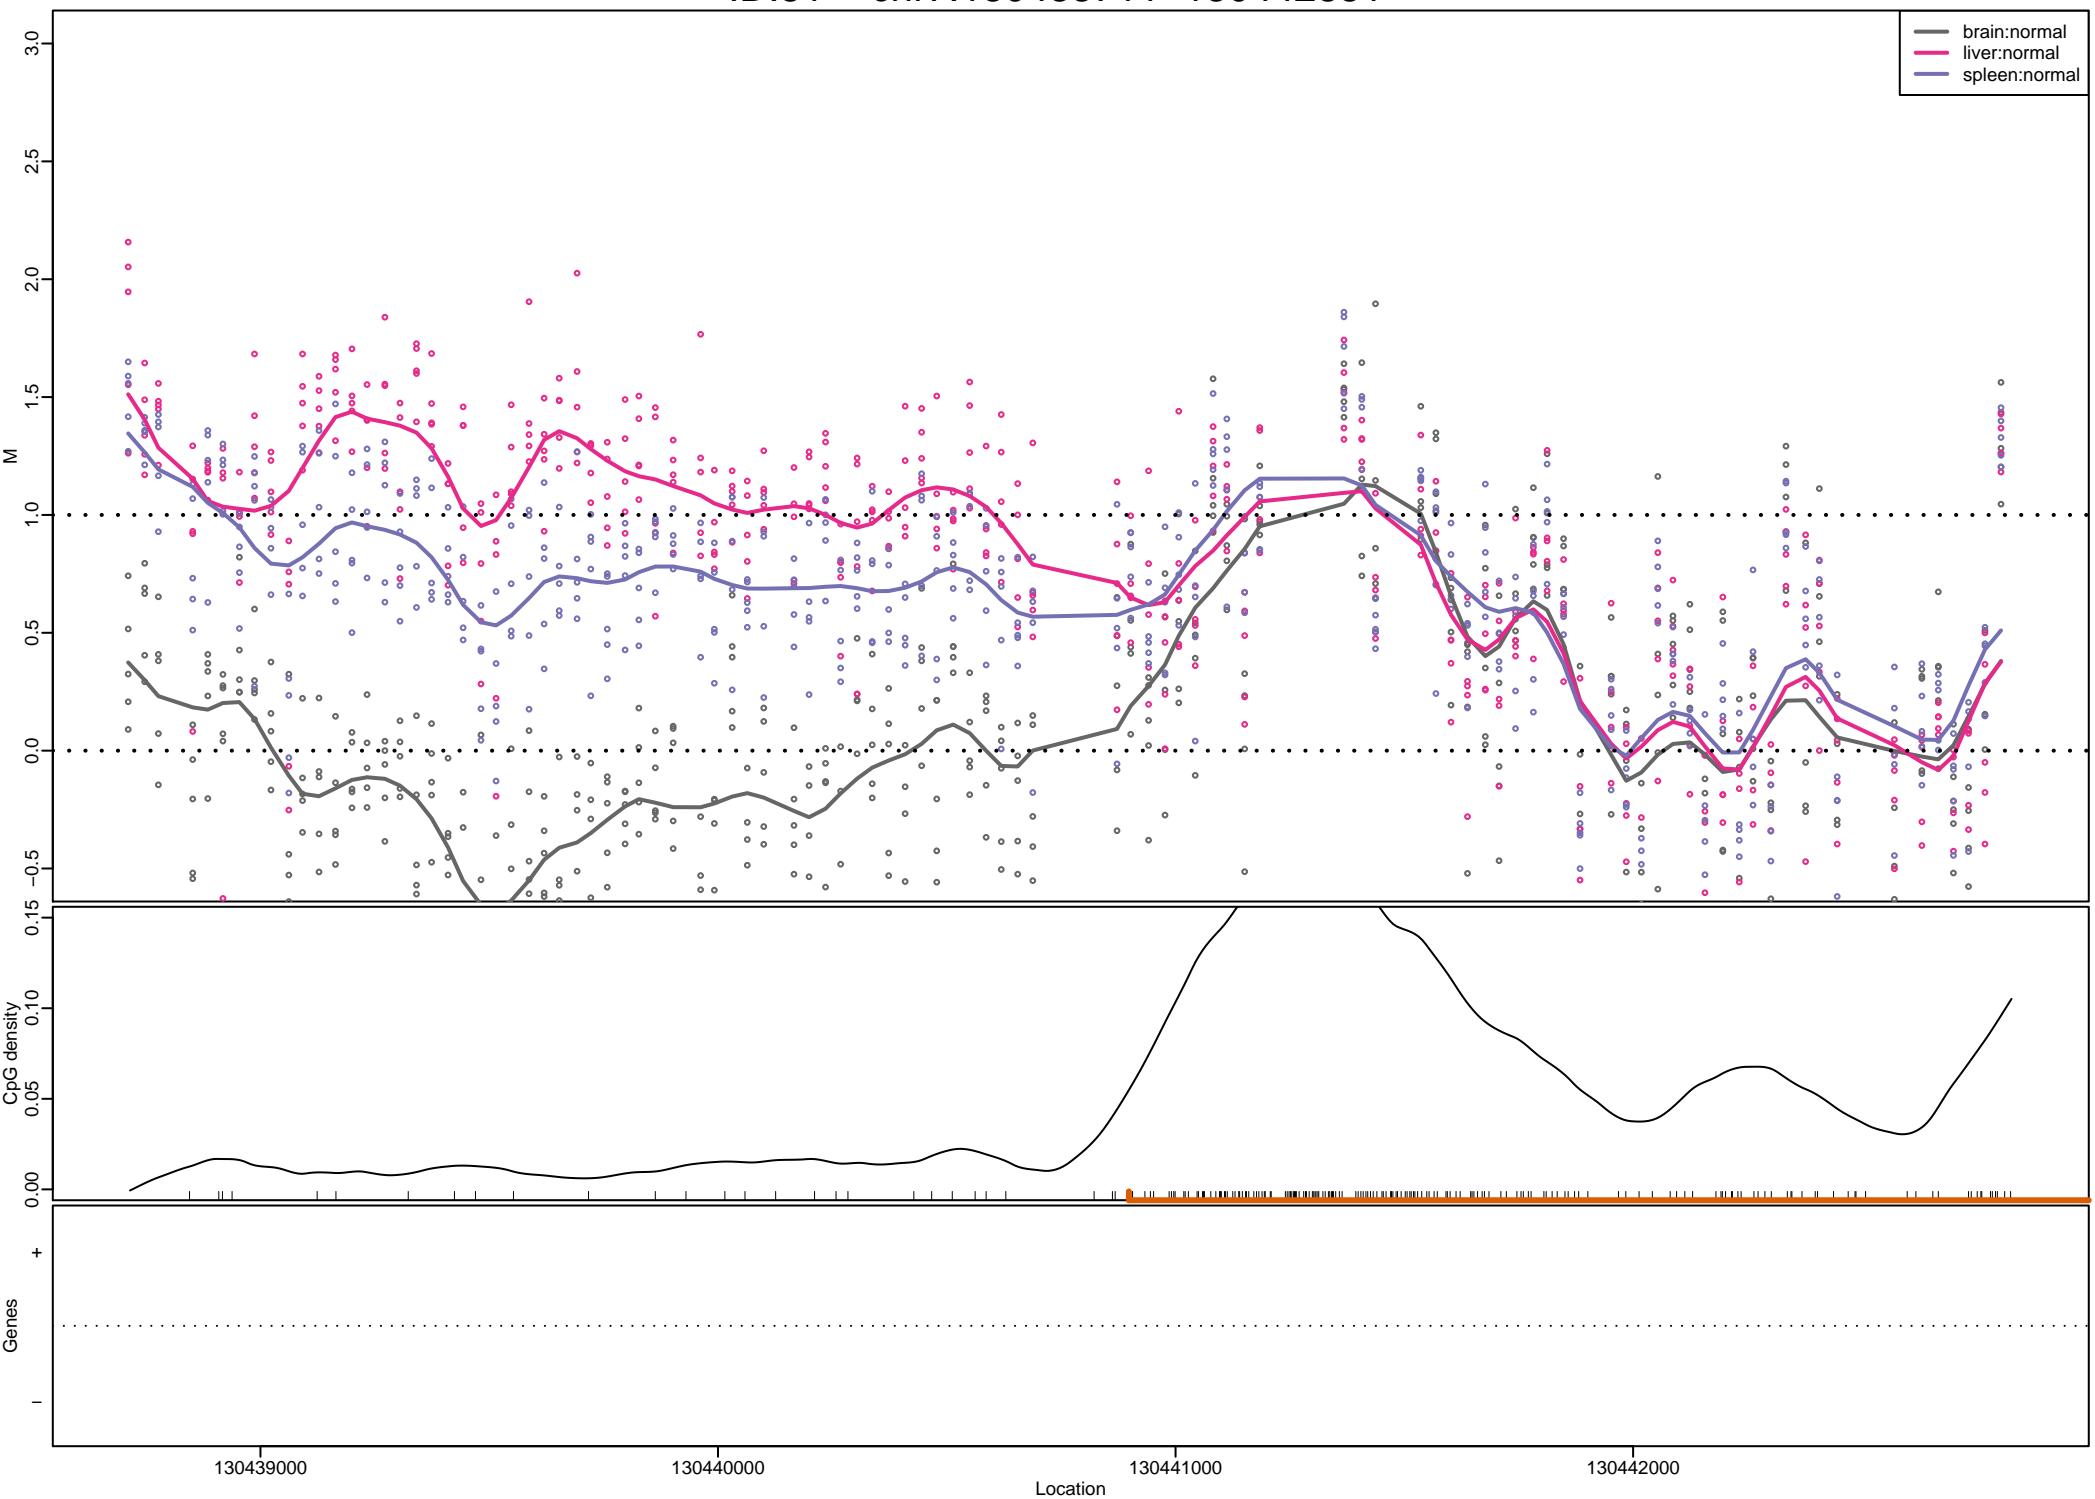

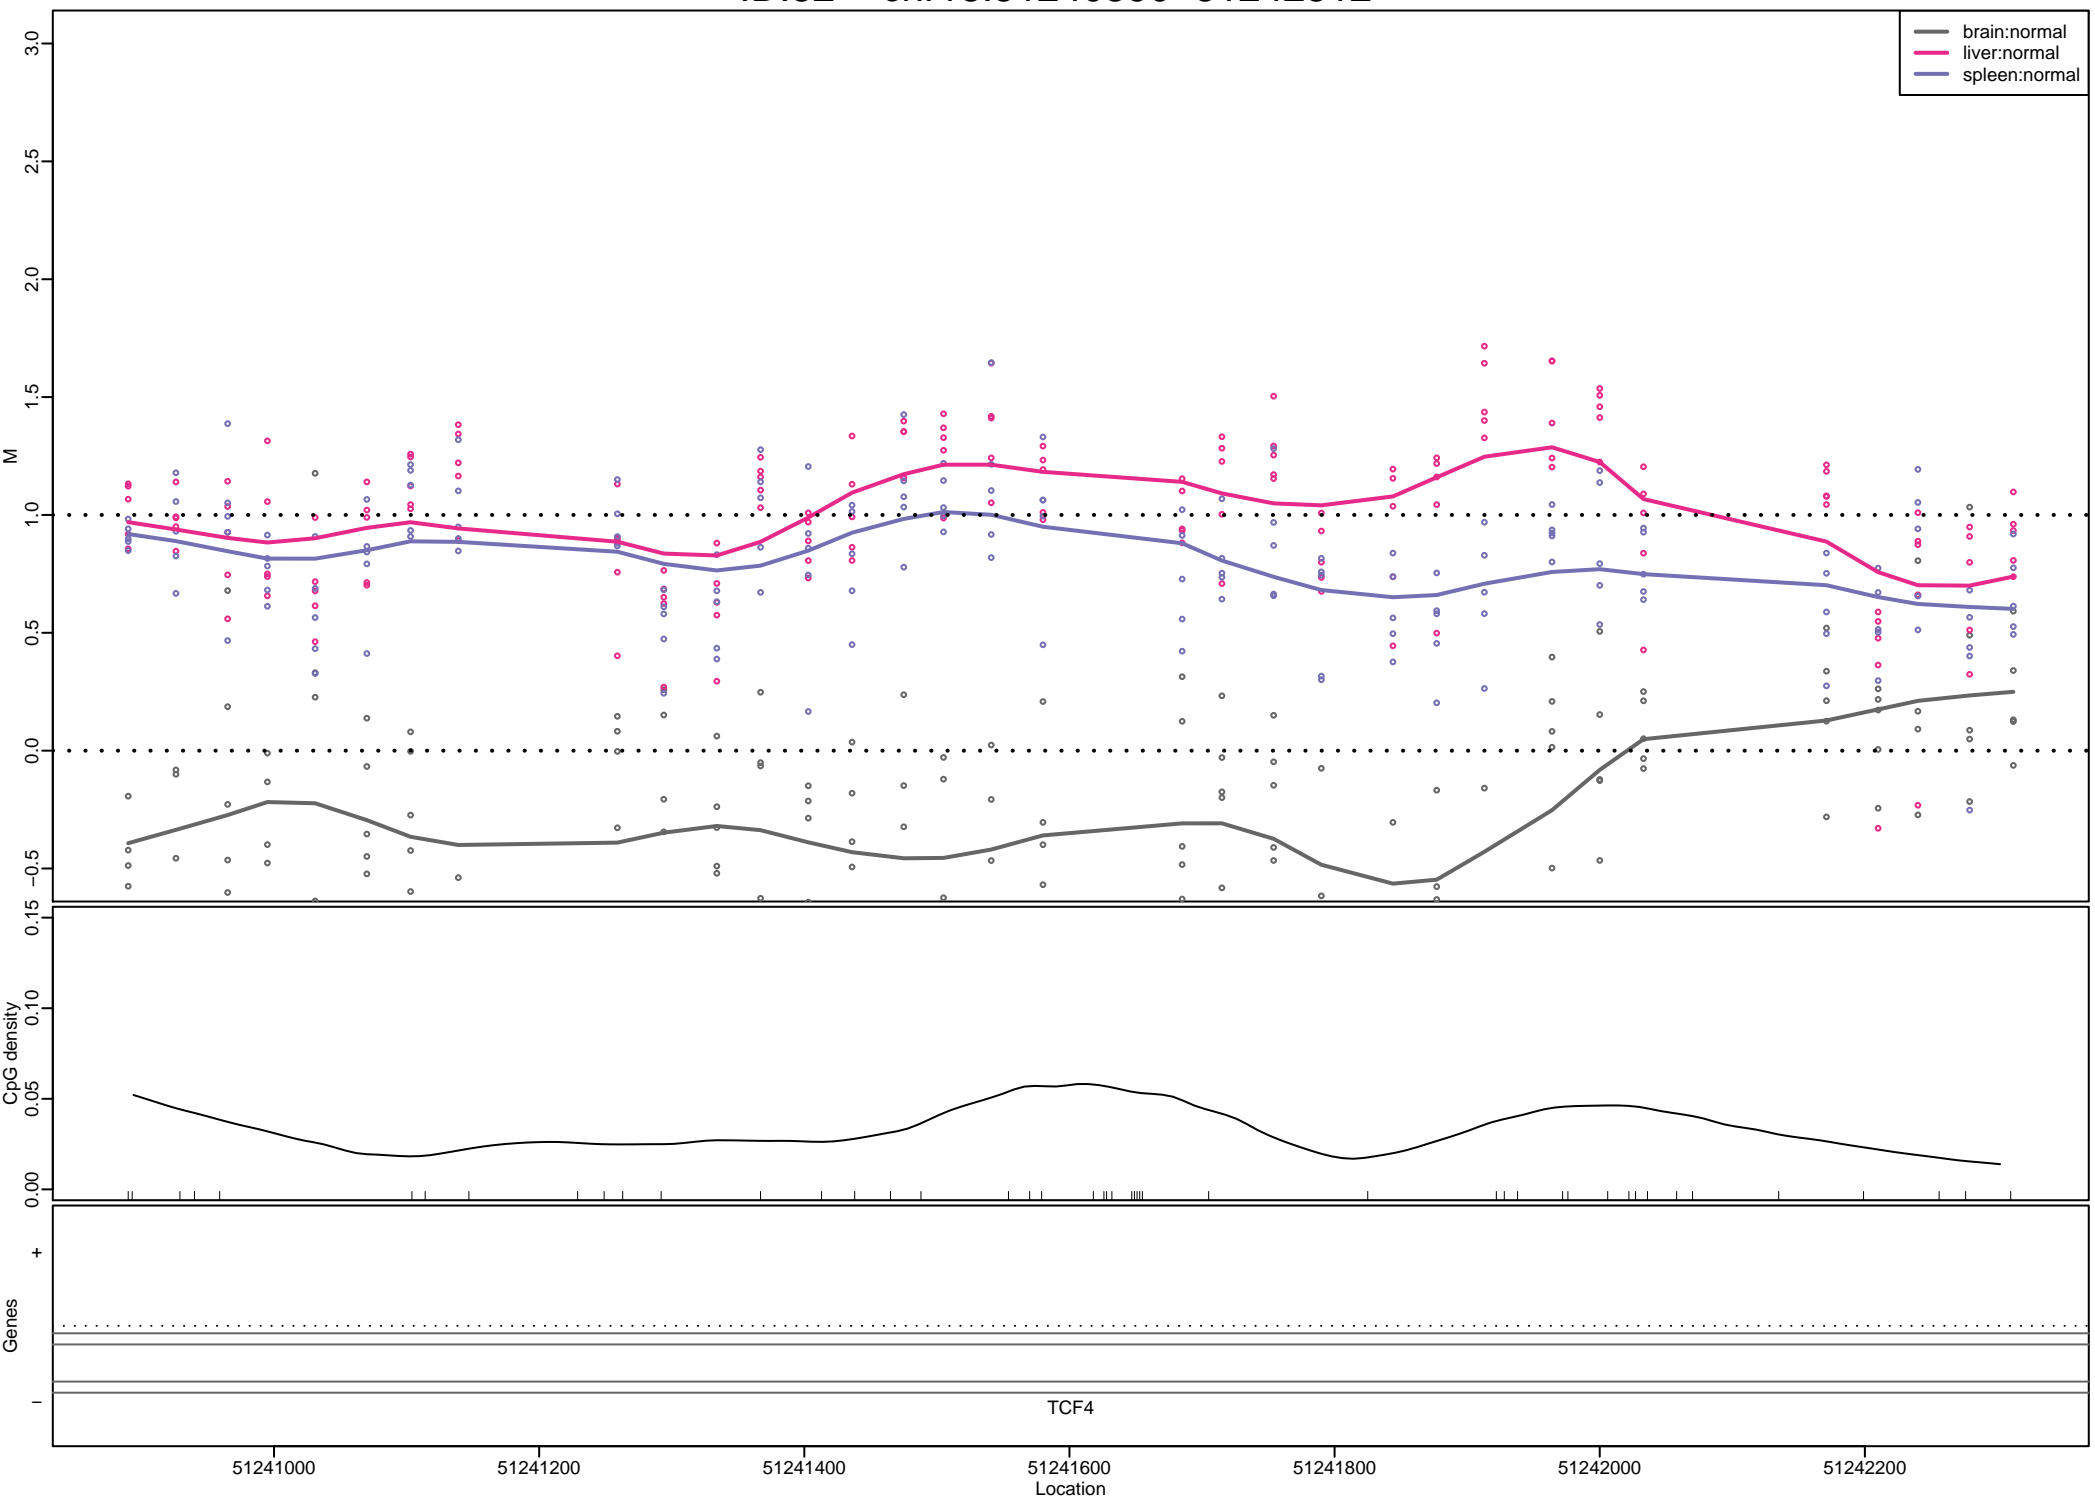

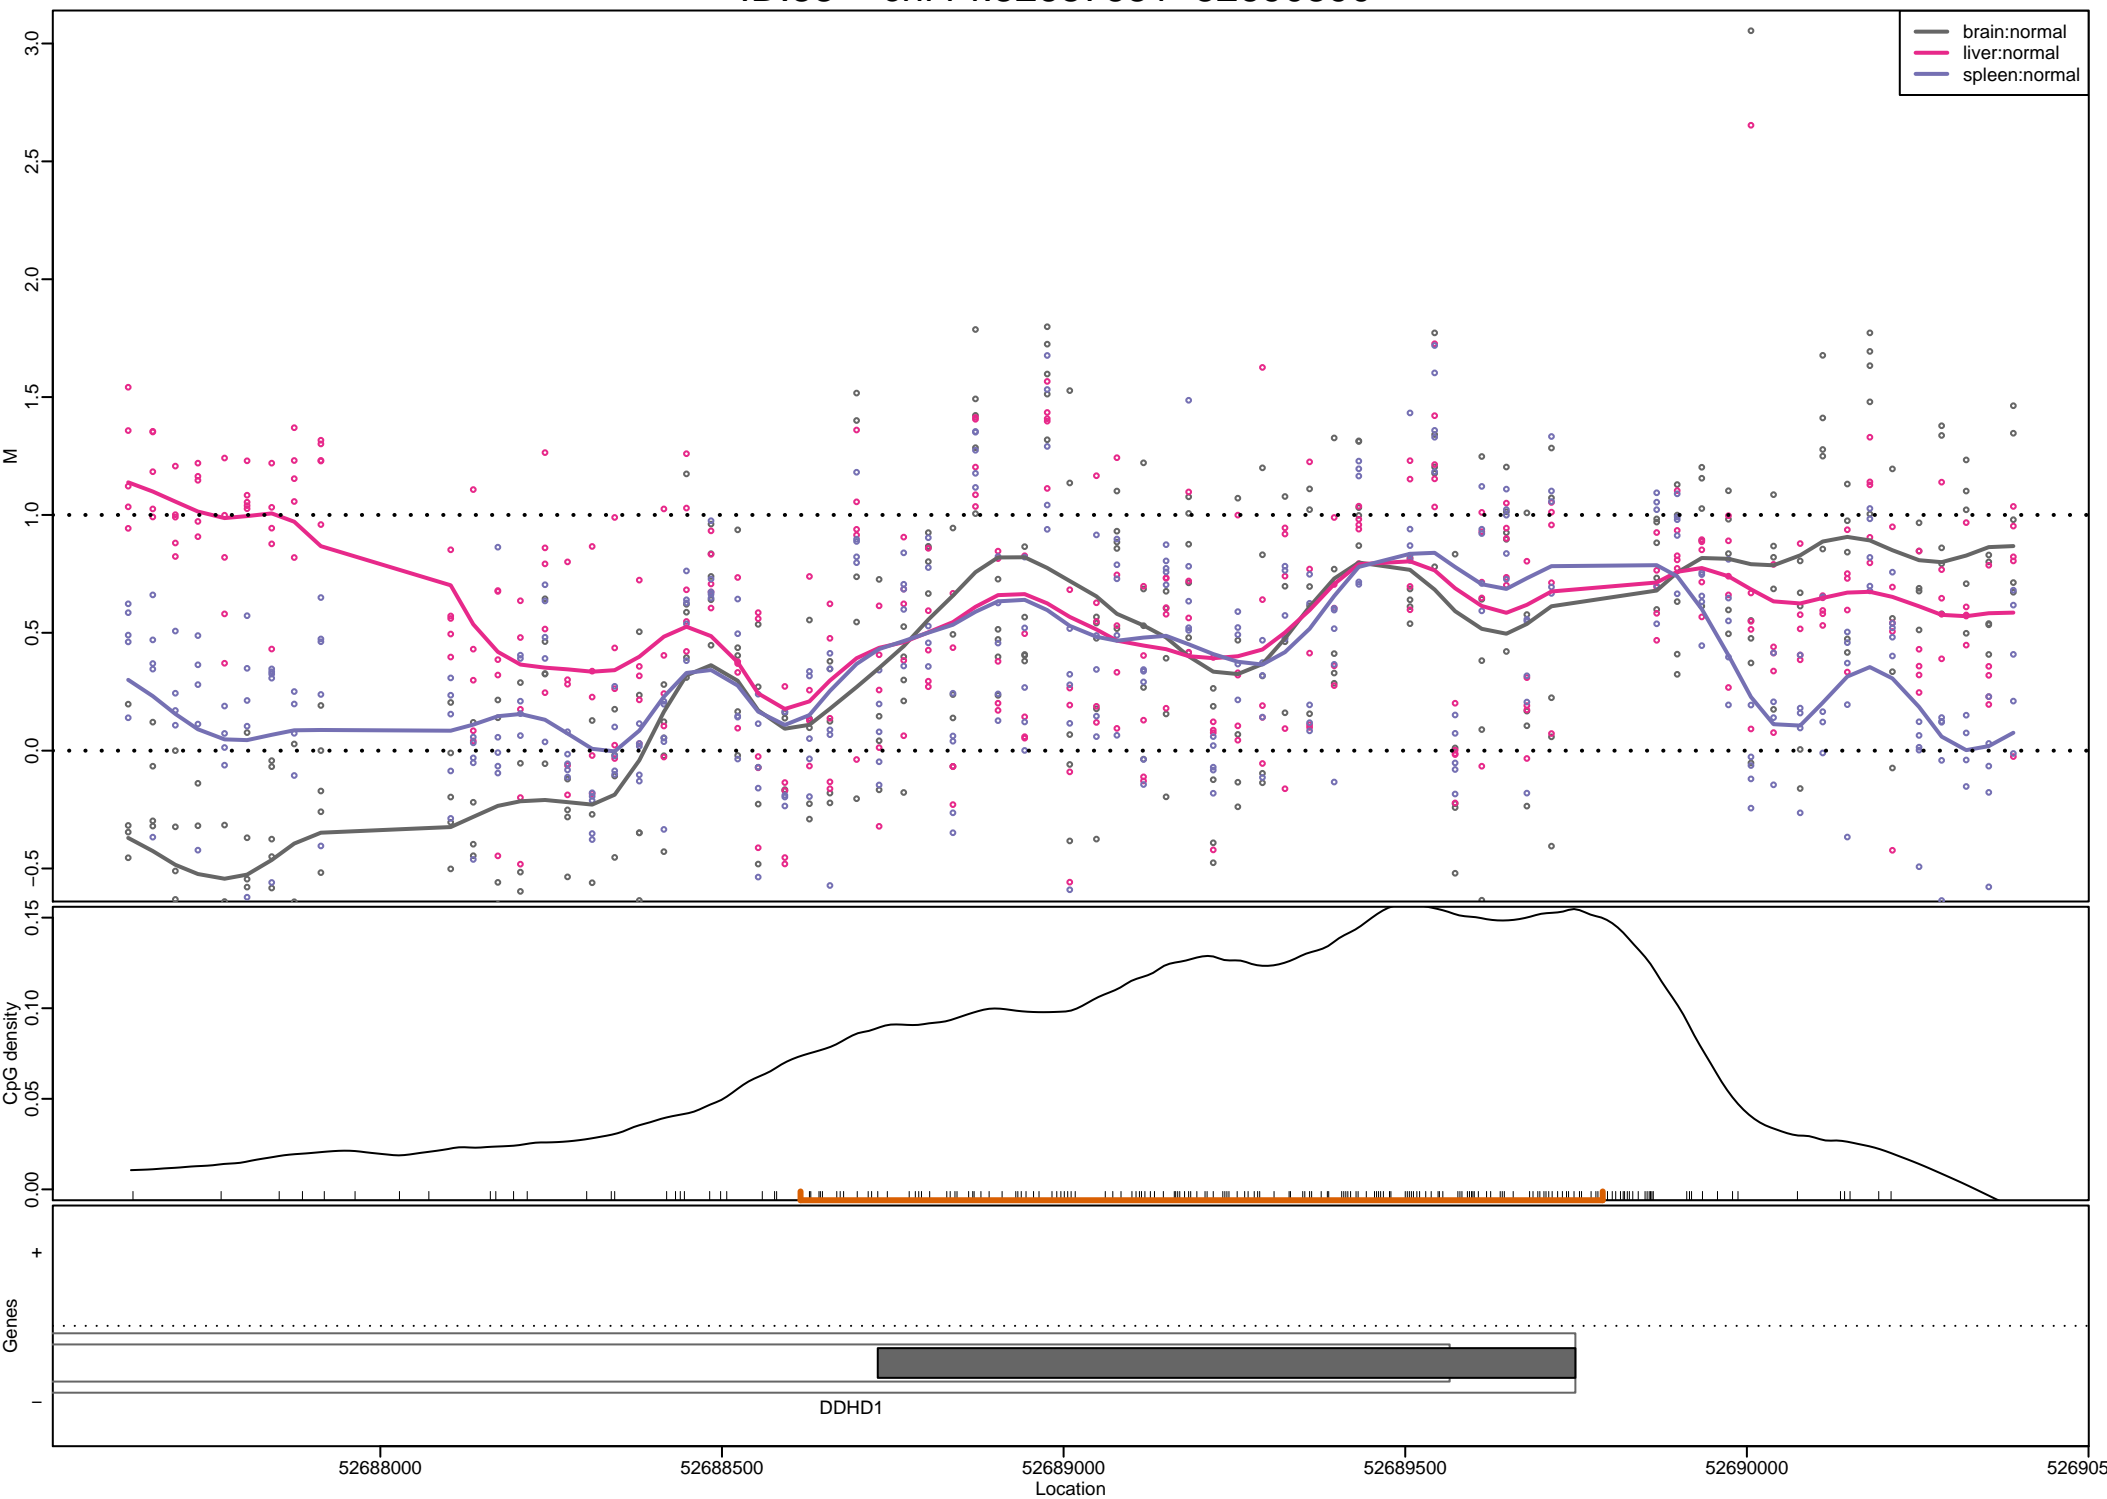

ID:34--chr19:53704859-53707561

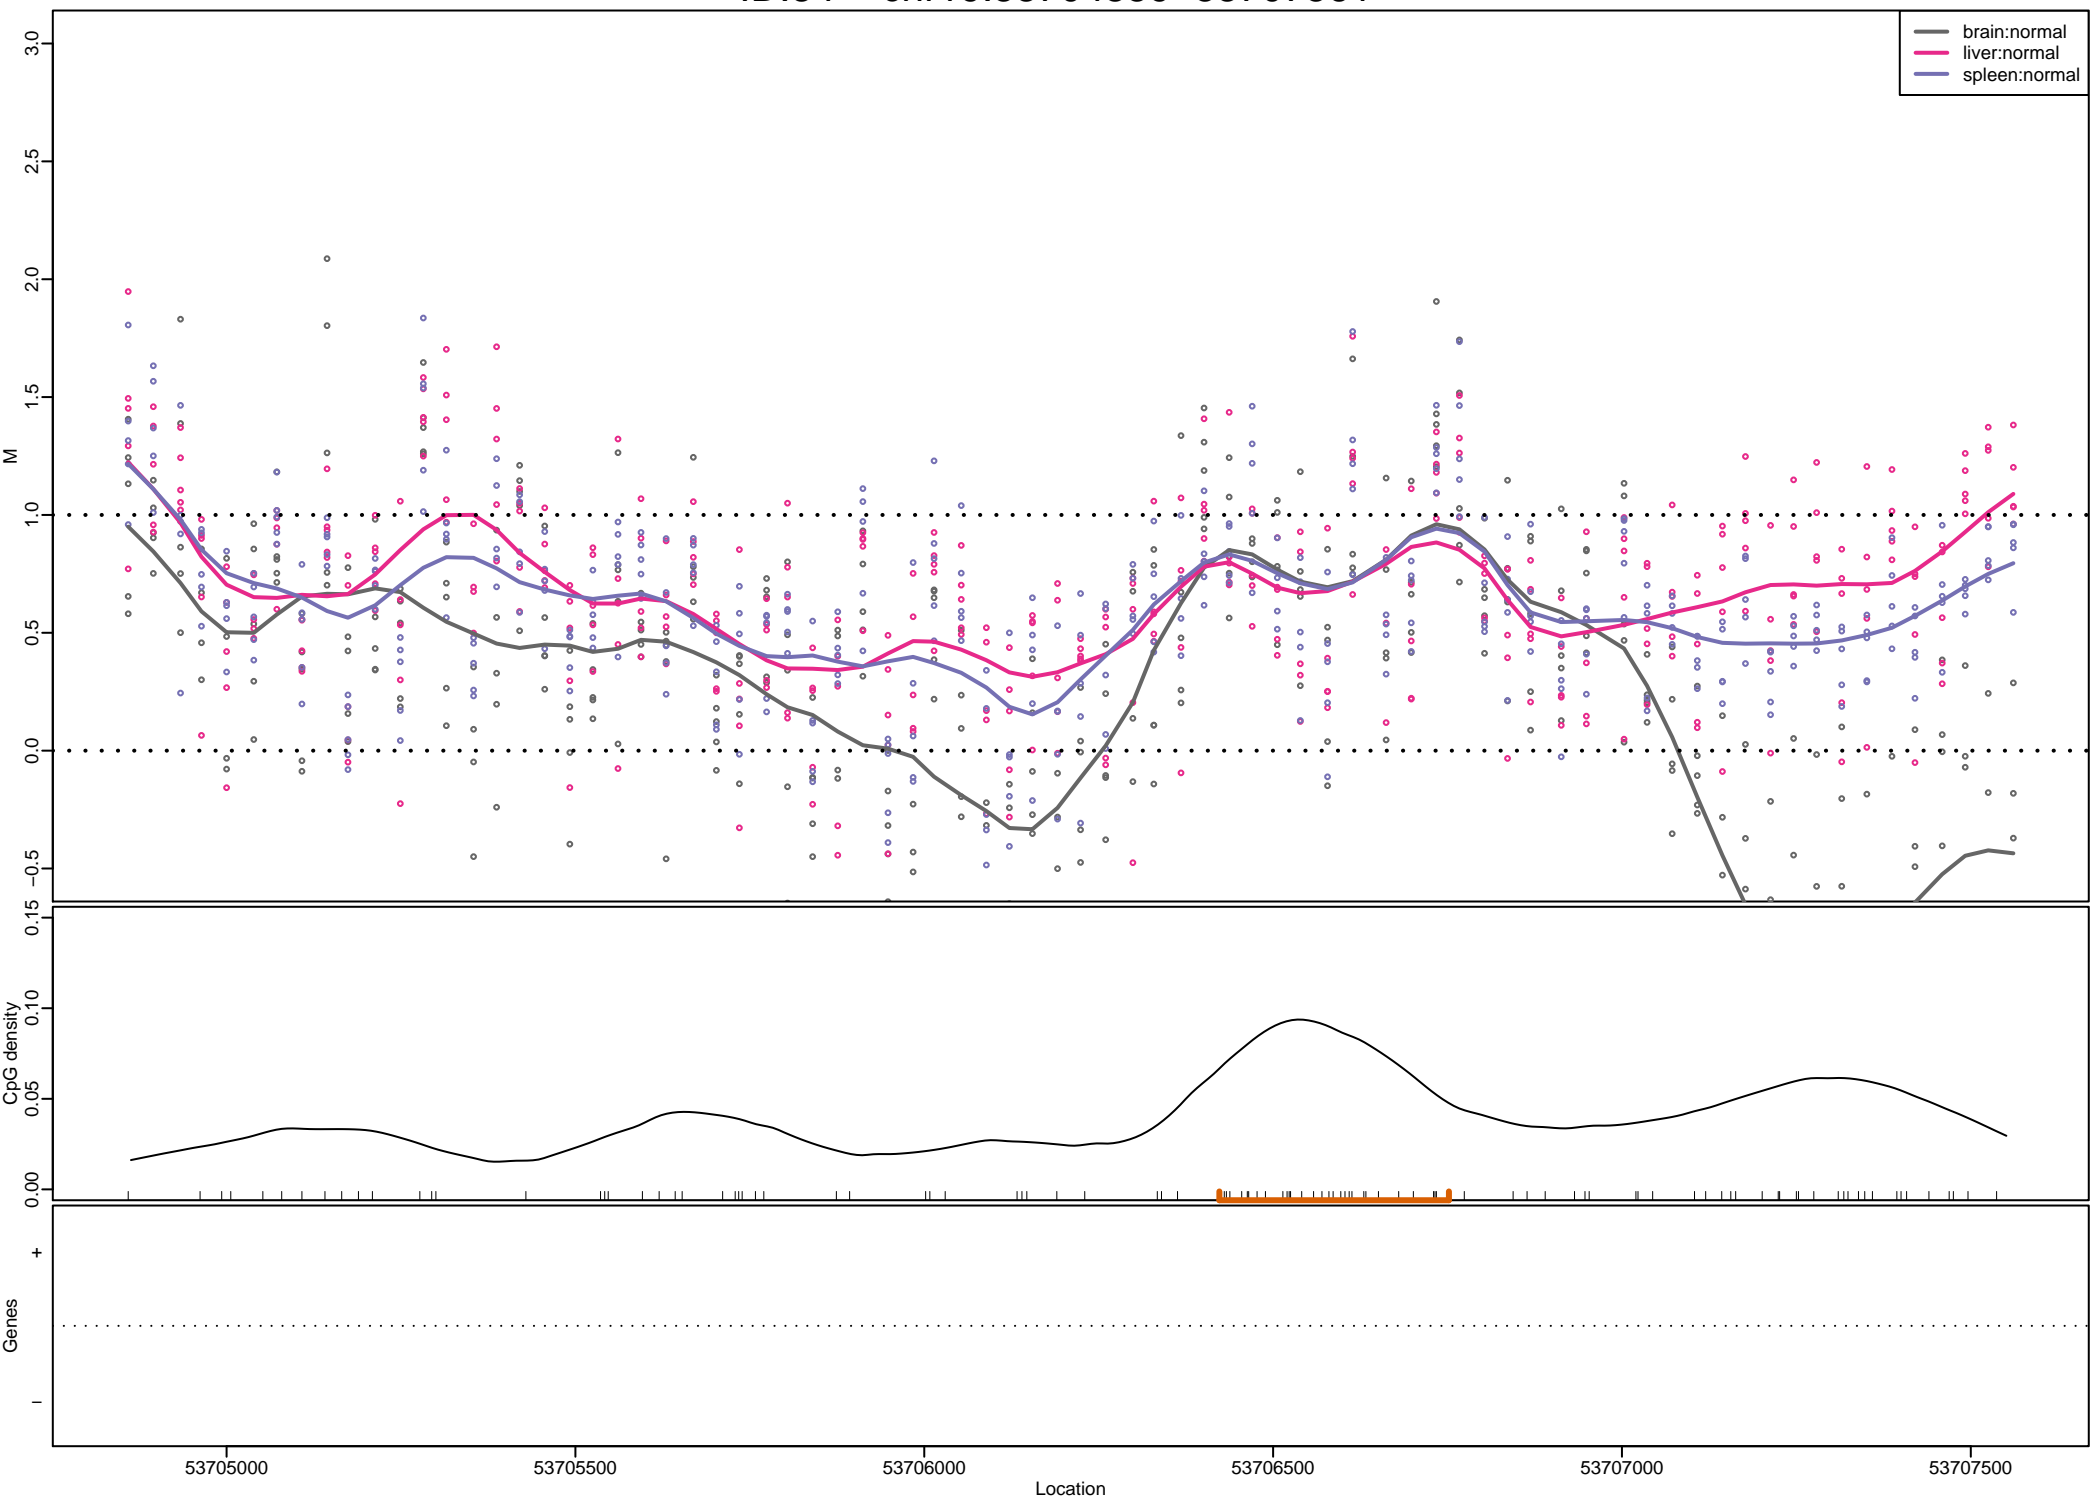

ID:35--chr1:242283486-242285494

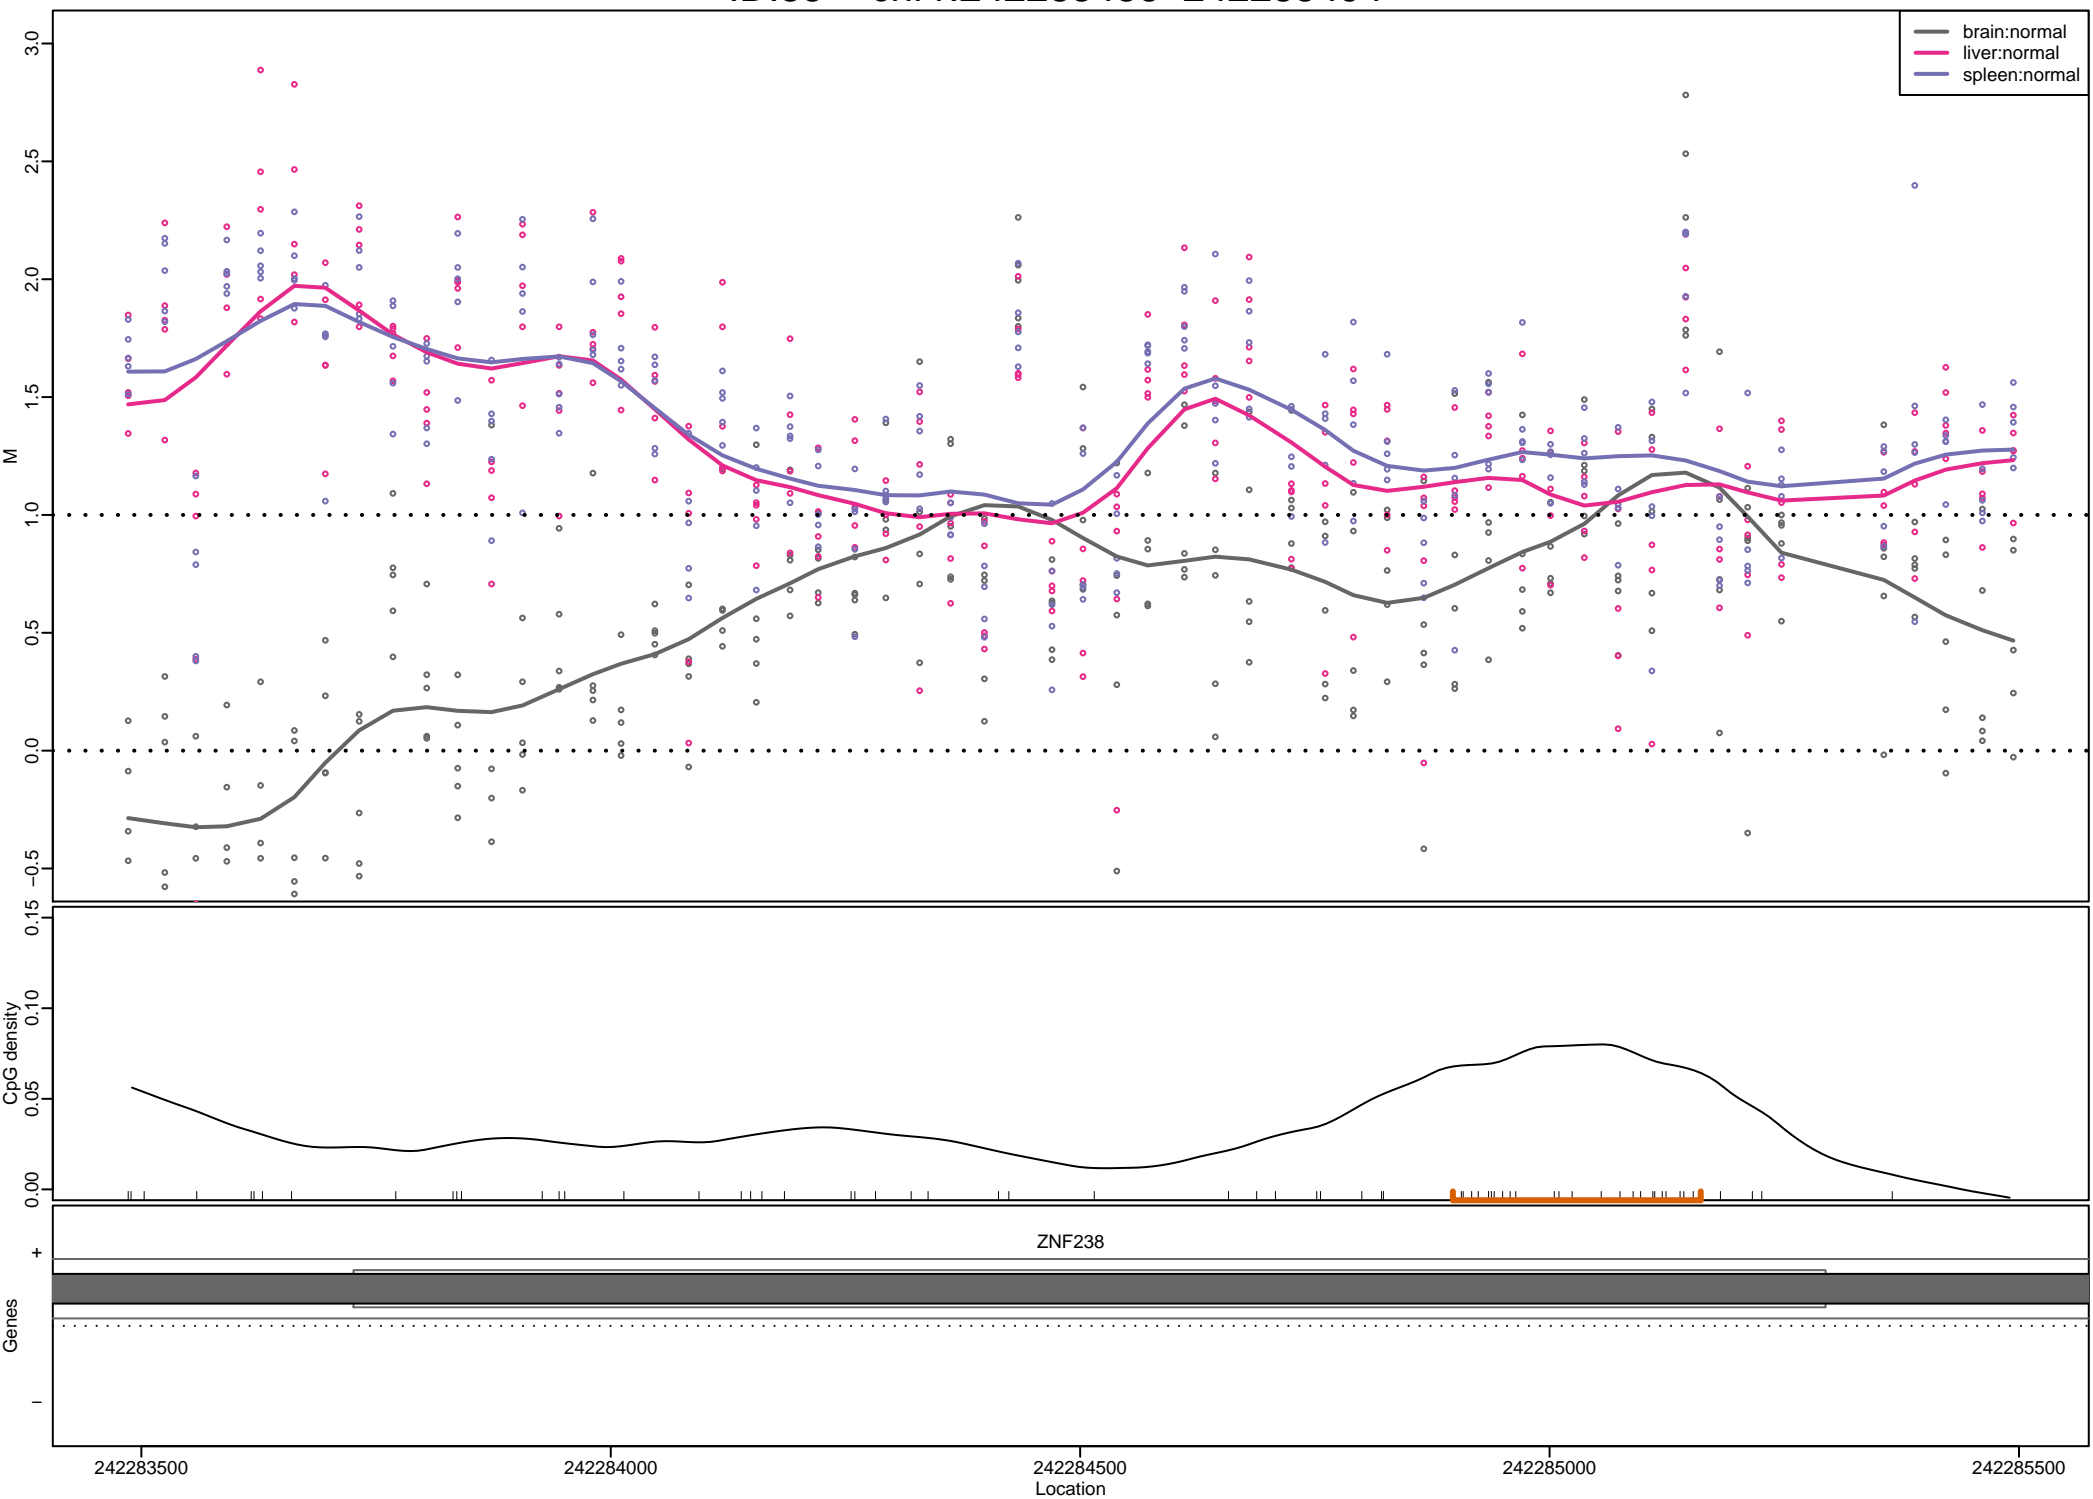

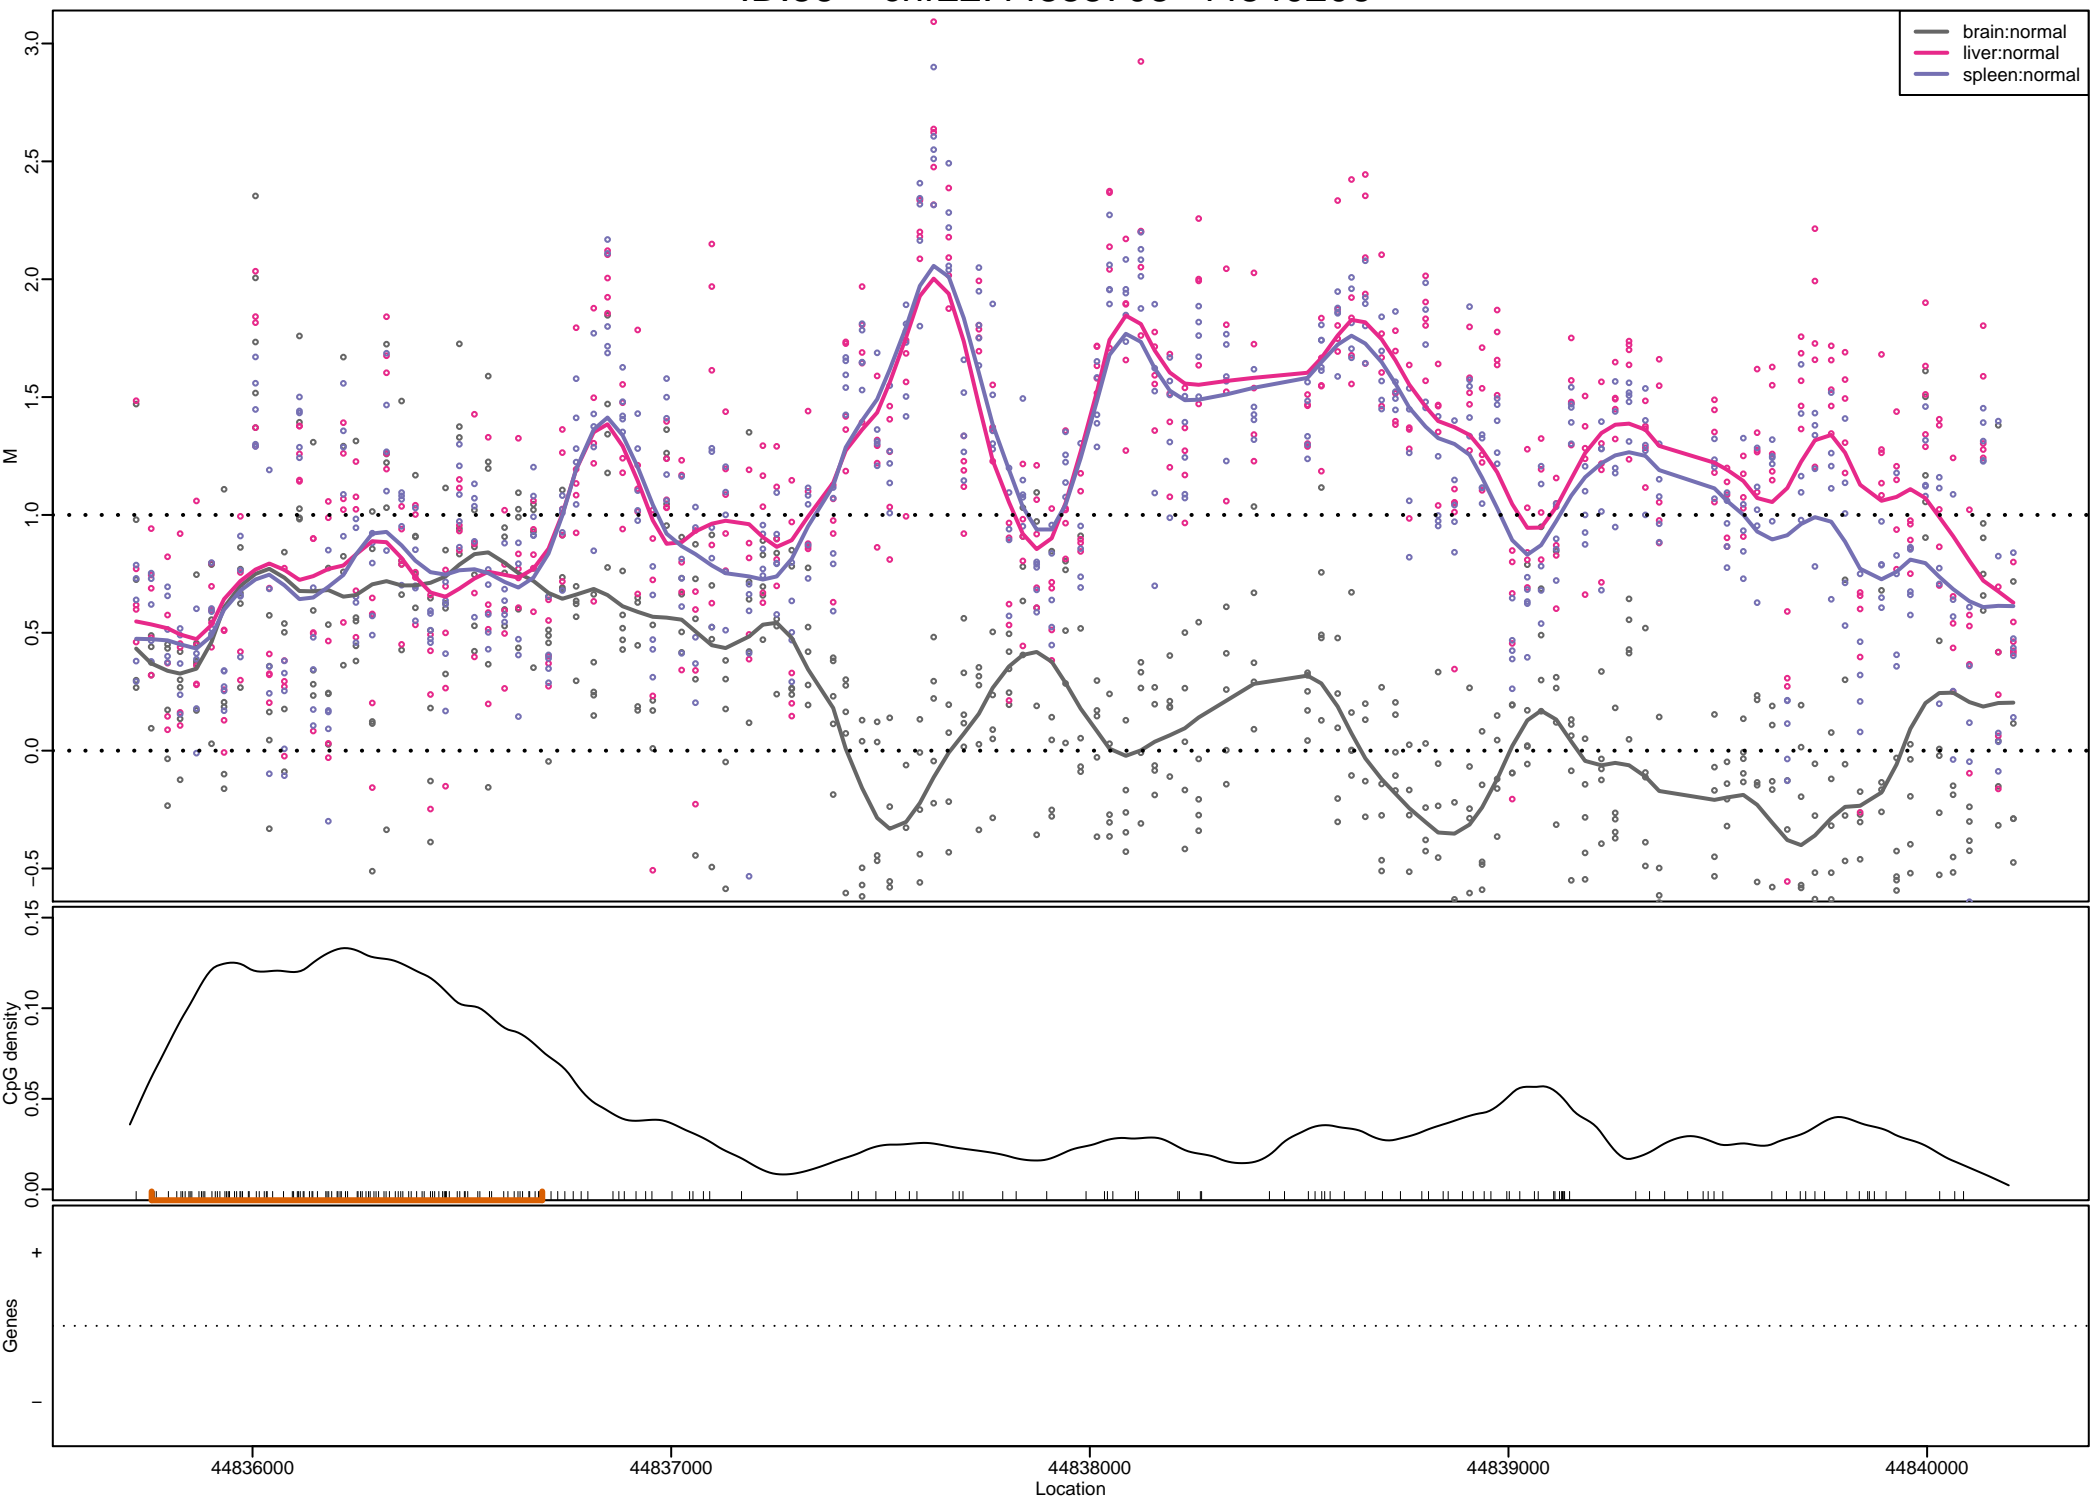

ID:37--chr22:26520905-26524480

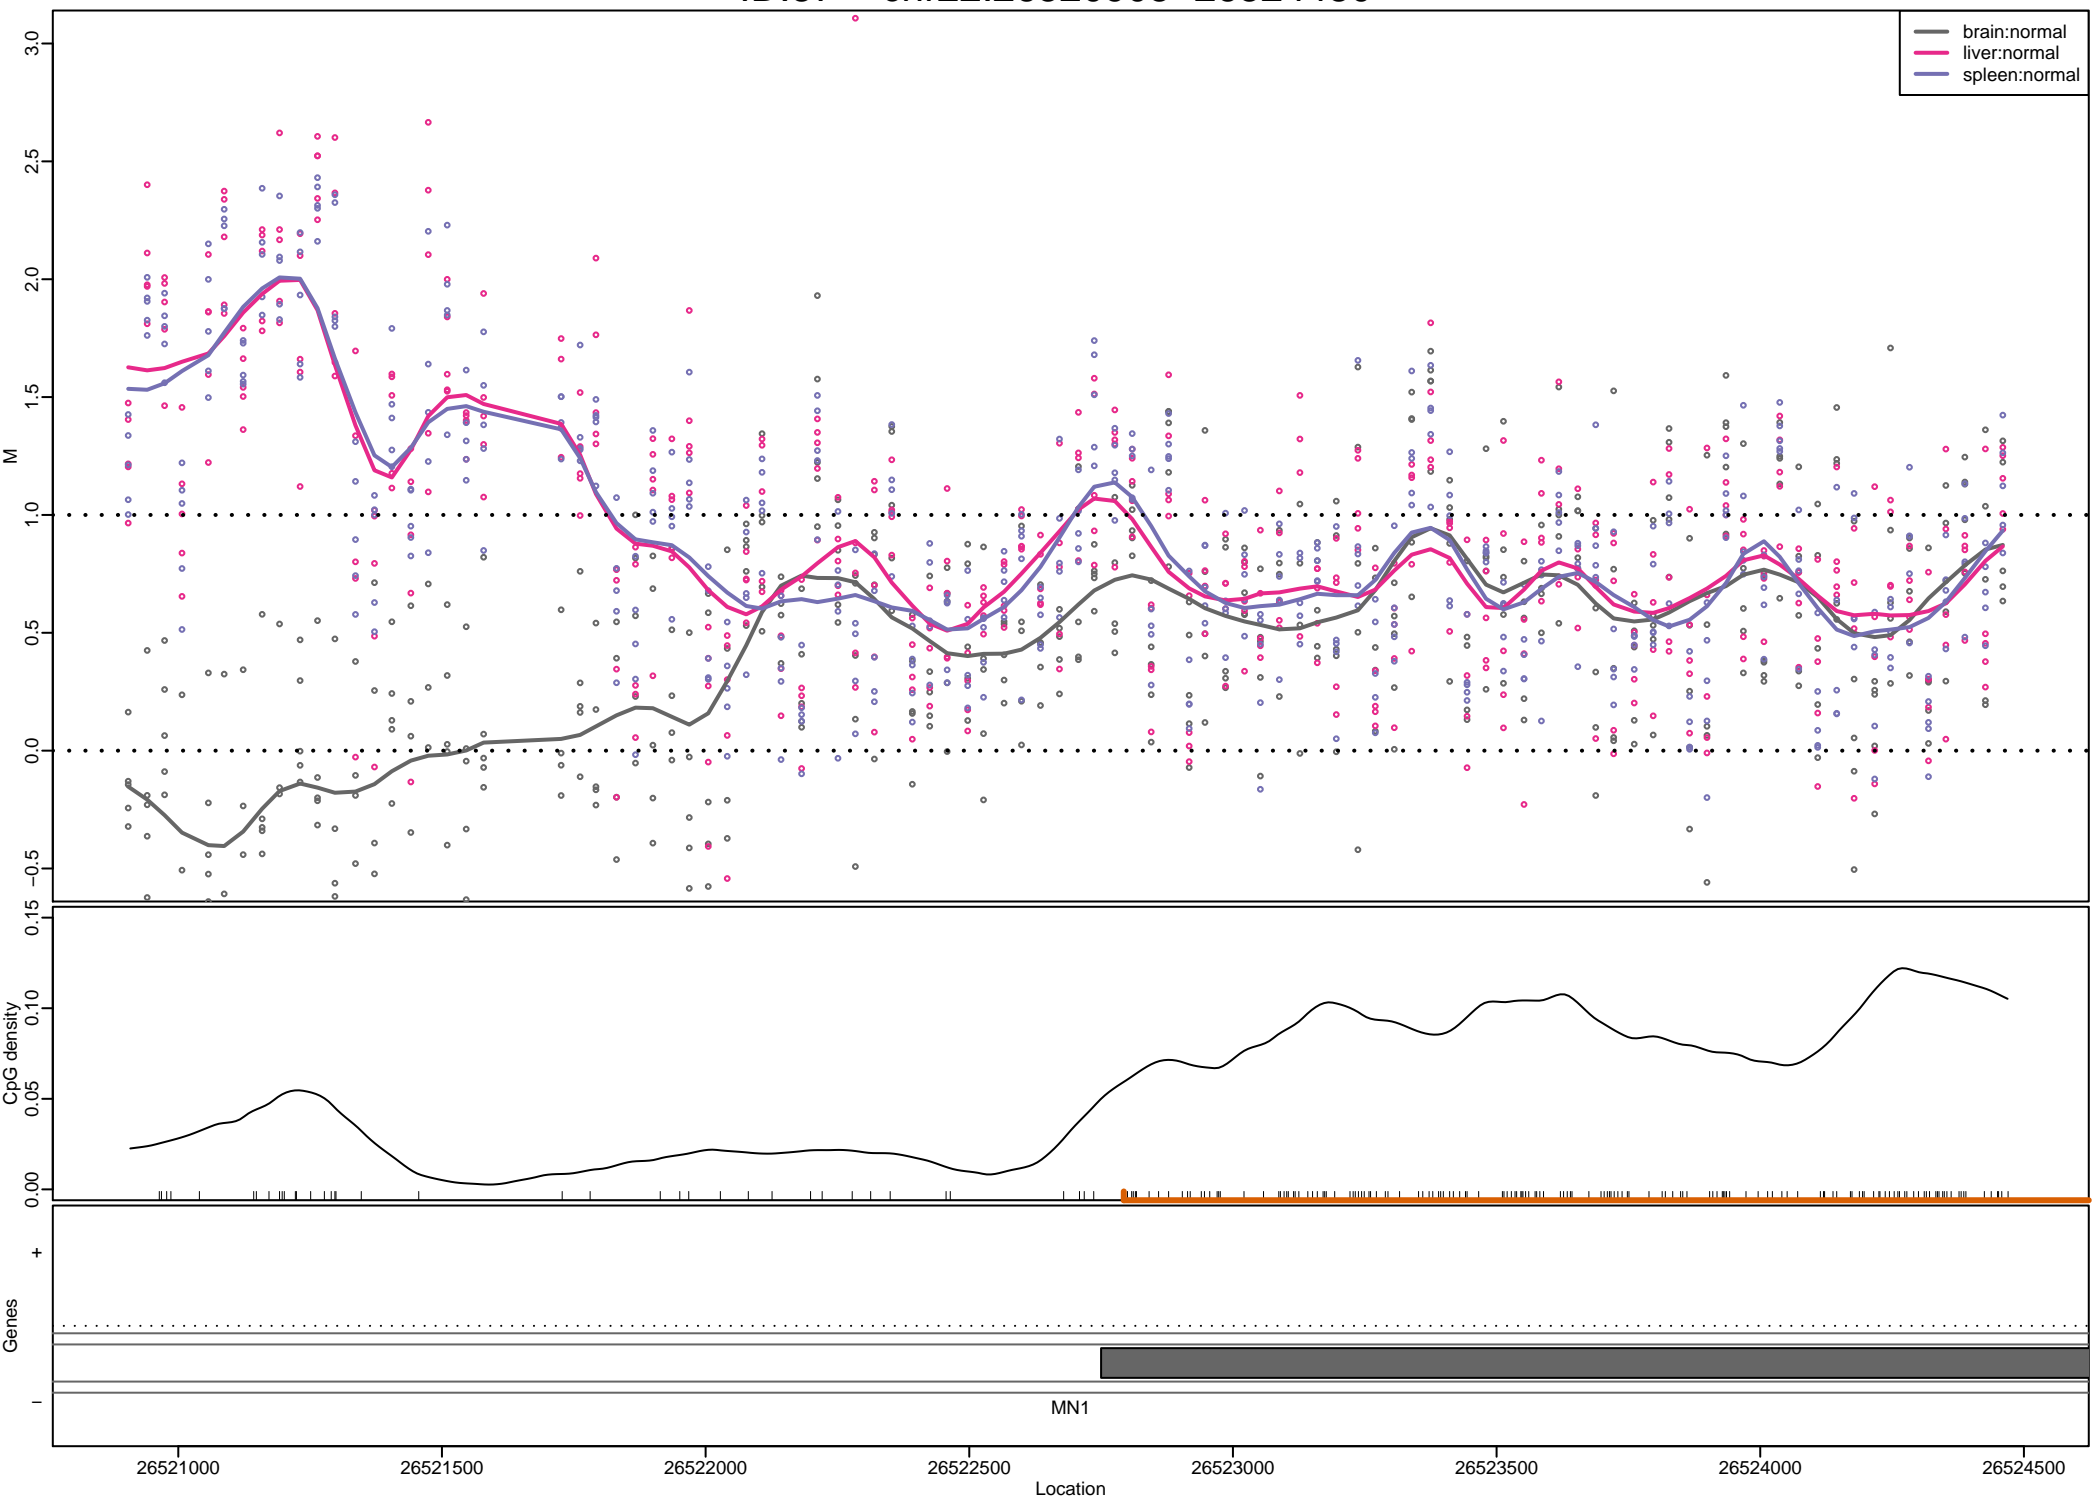

ID:38--chr12:111302662-111305136

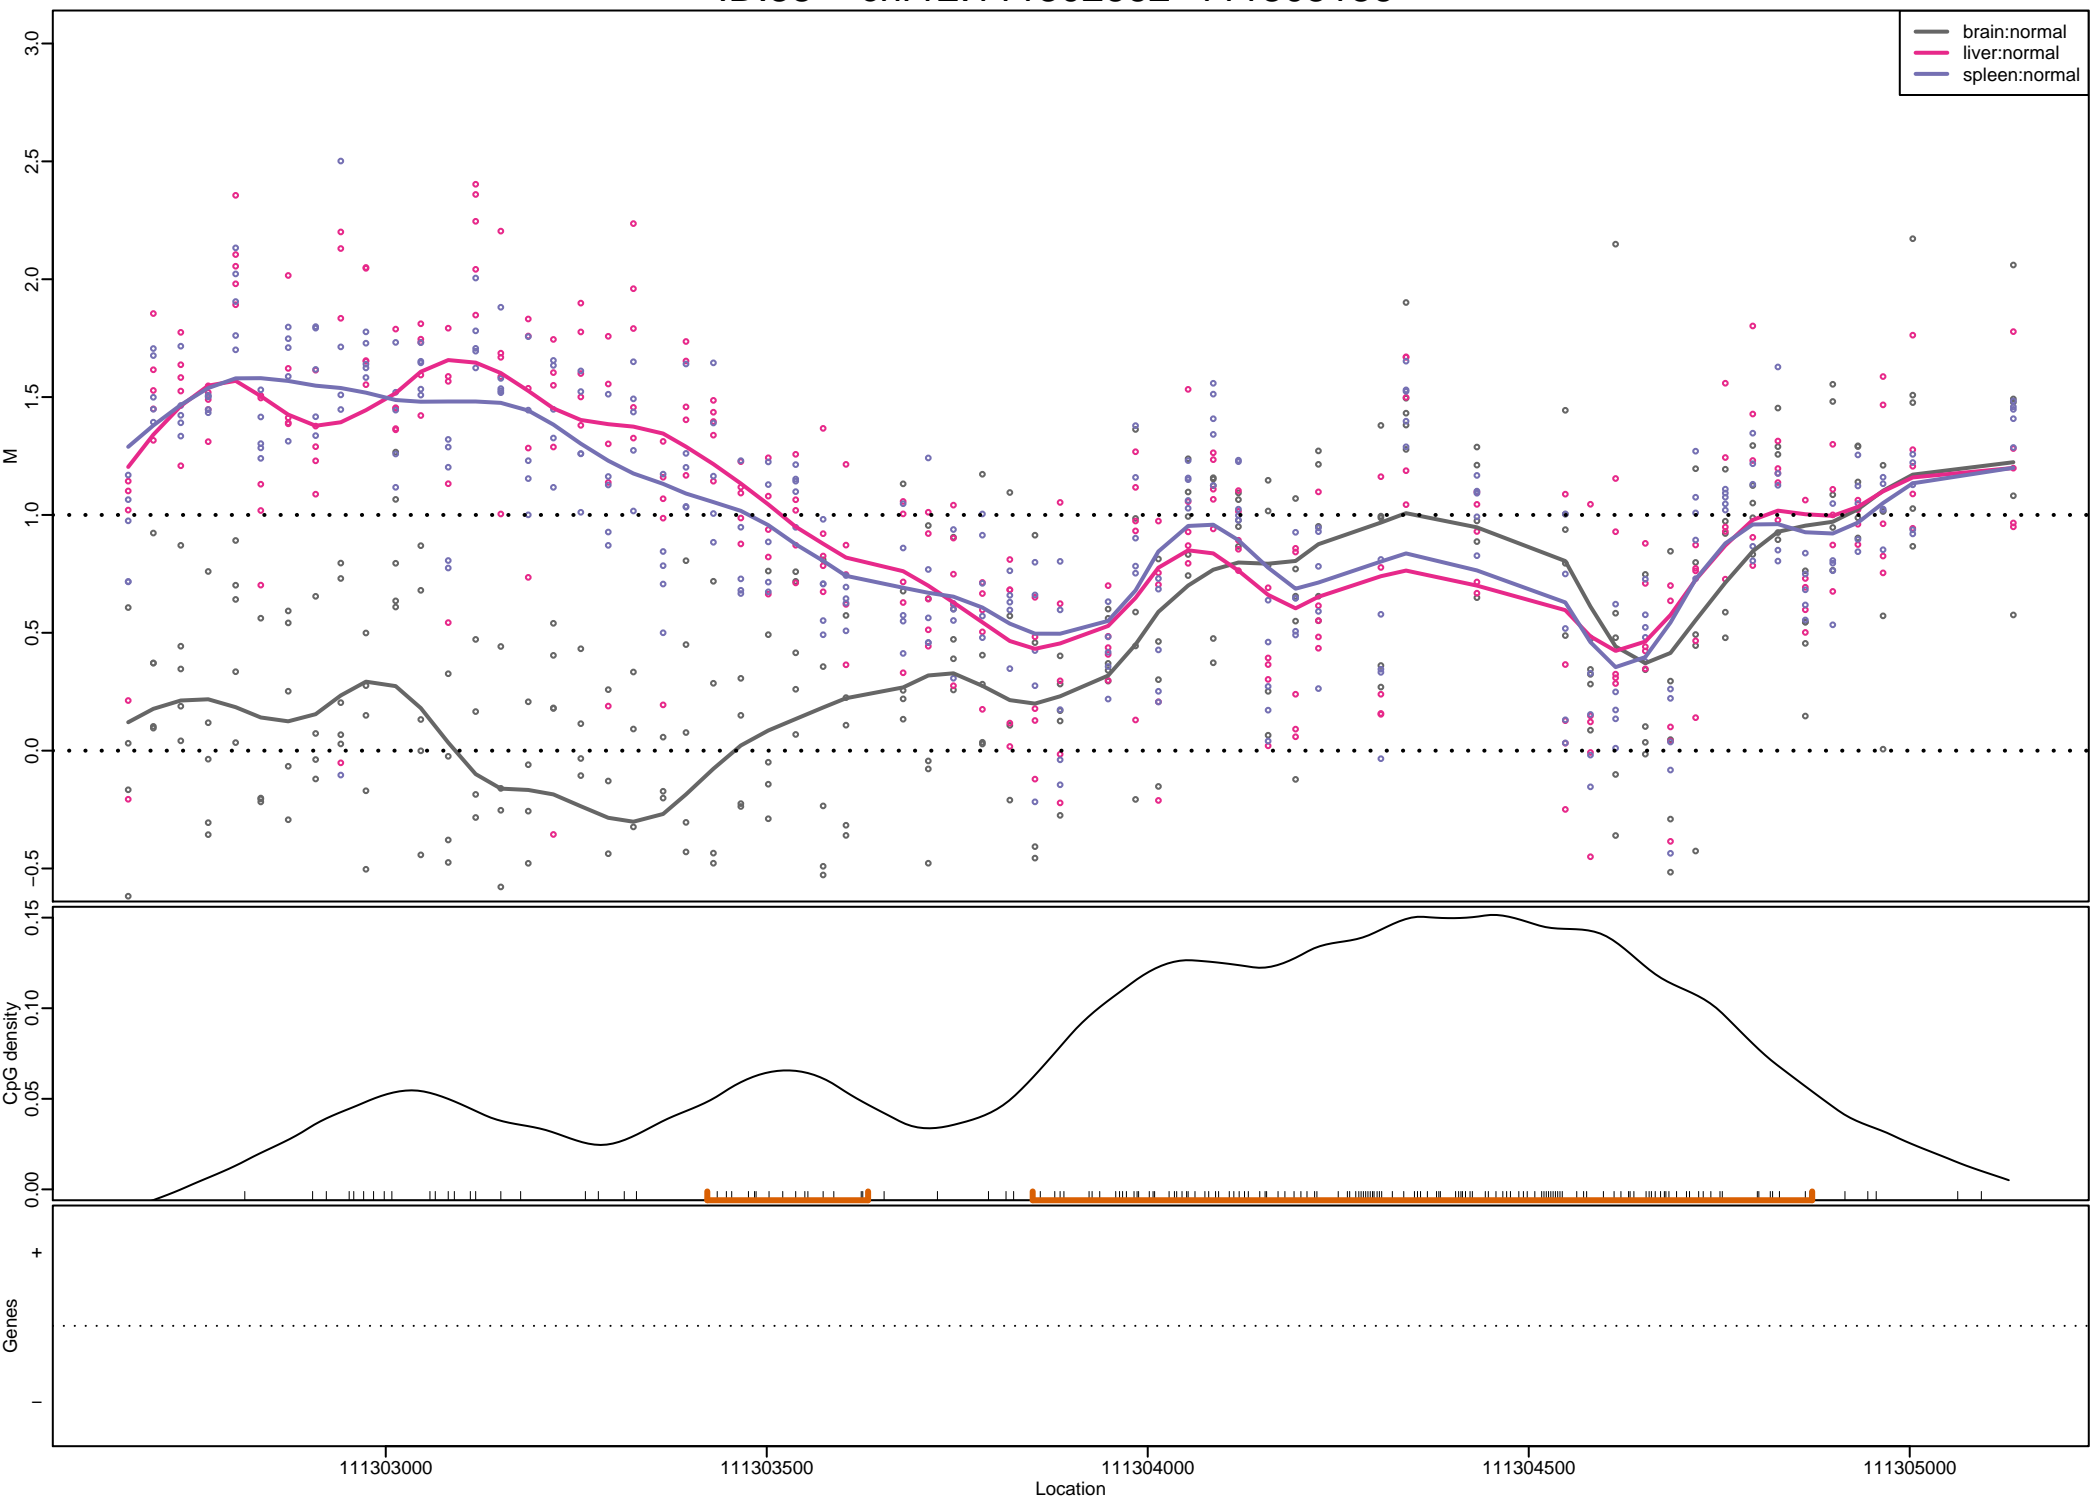

ID:39--chr16:17466530-17471450

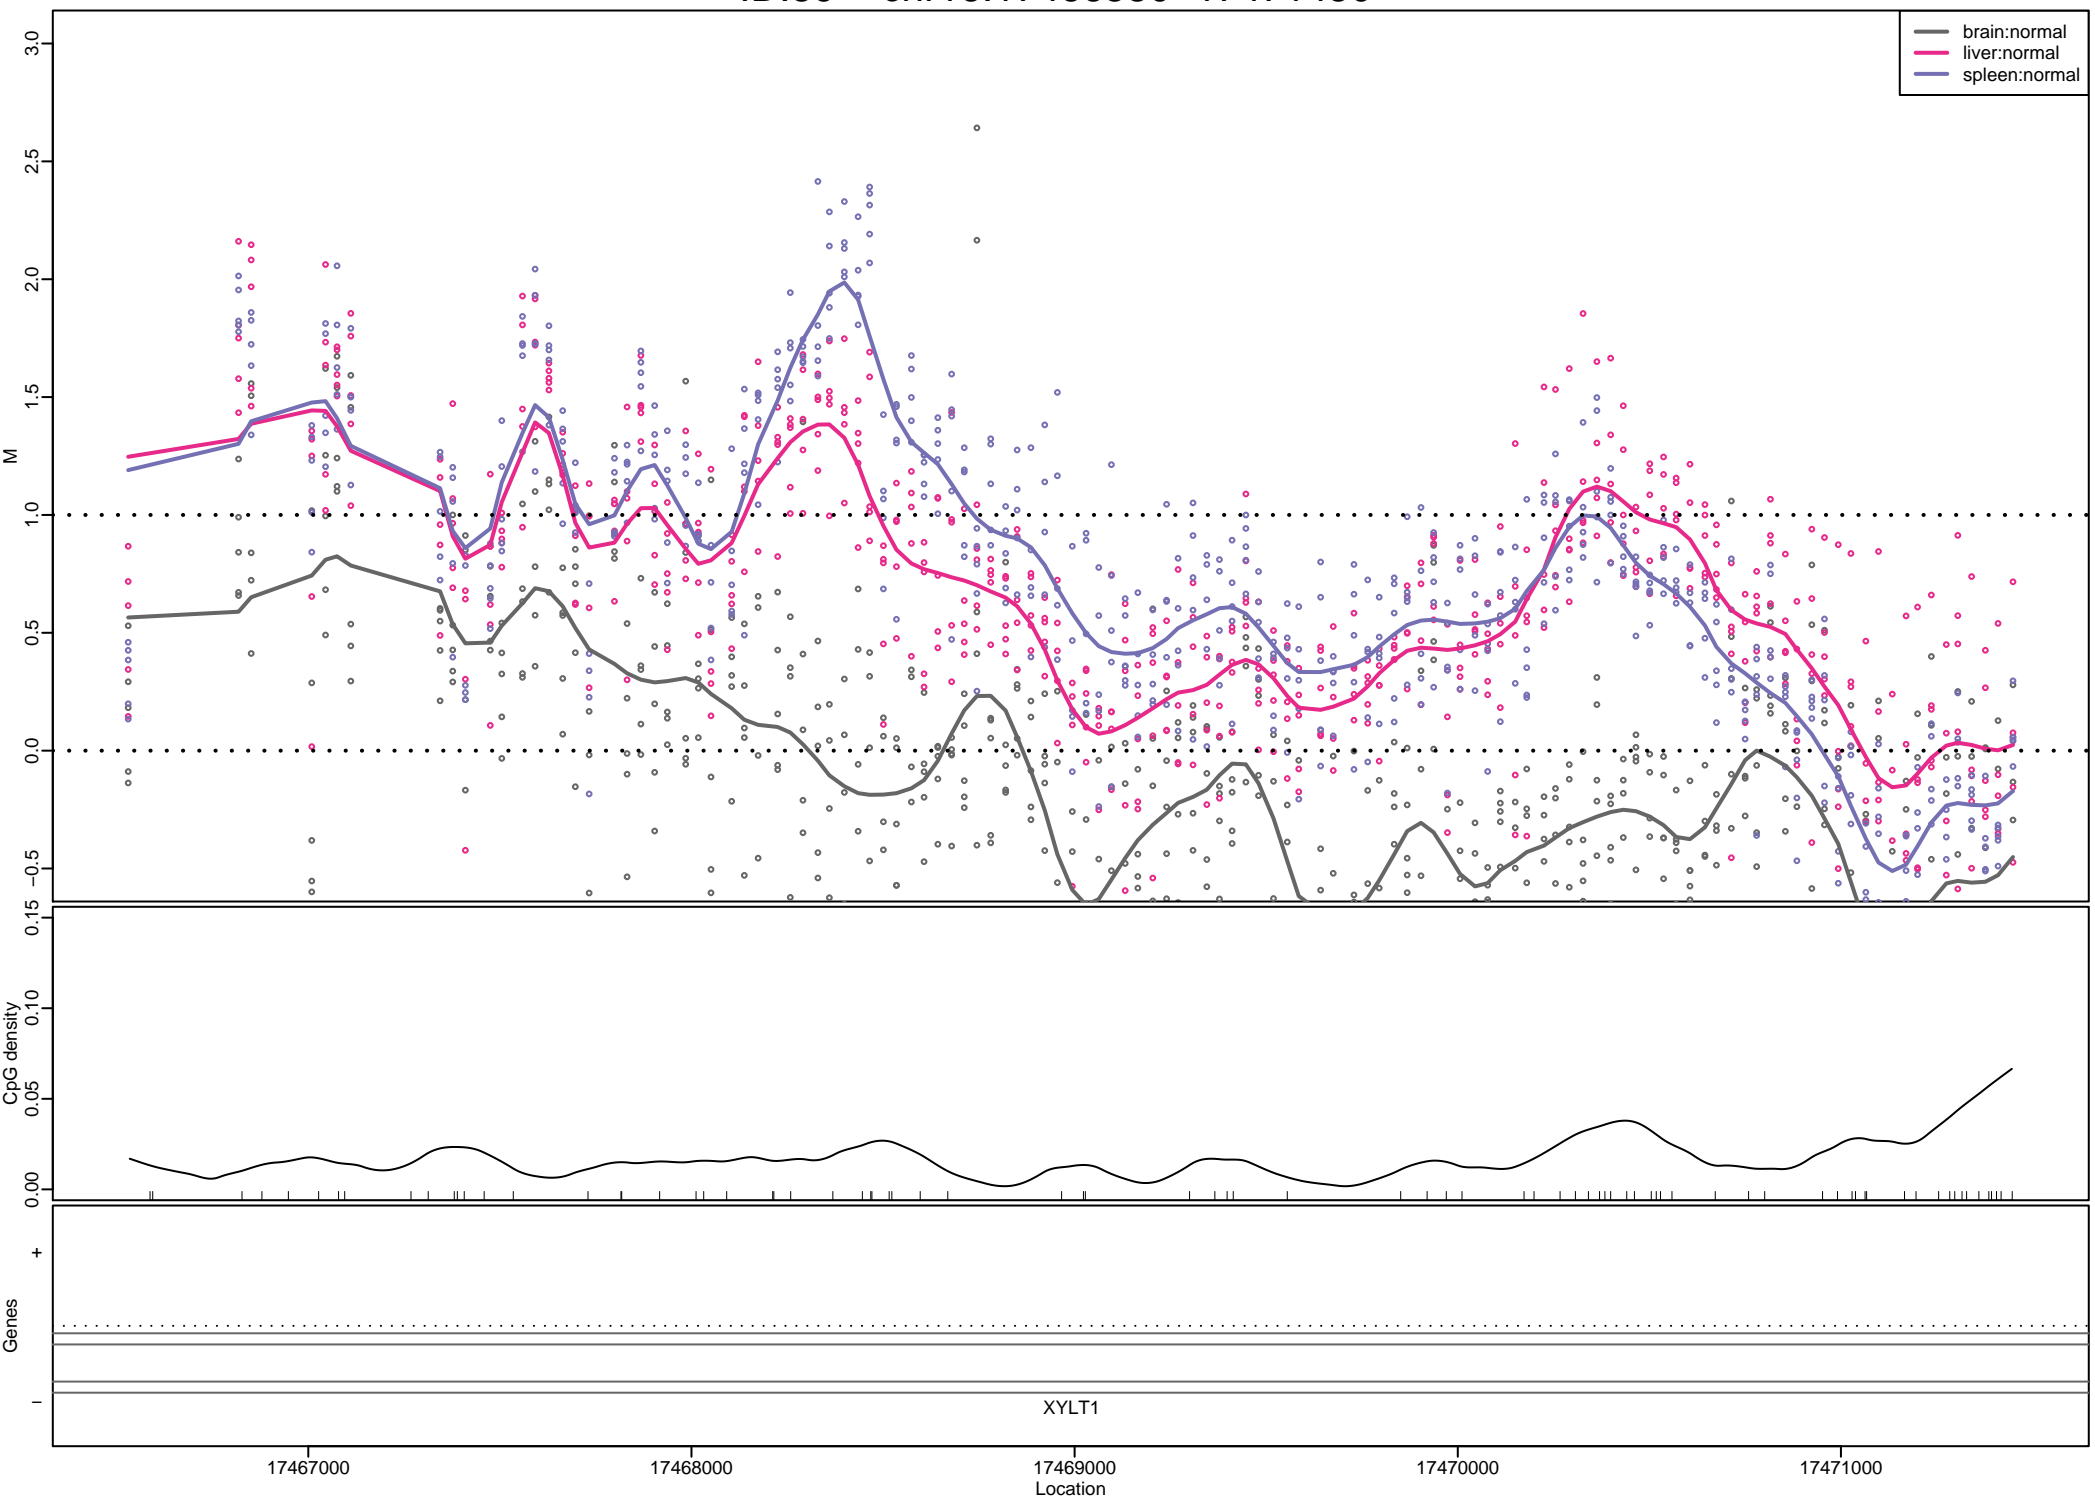

ID:40--chr6:53766206-53769549

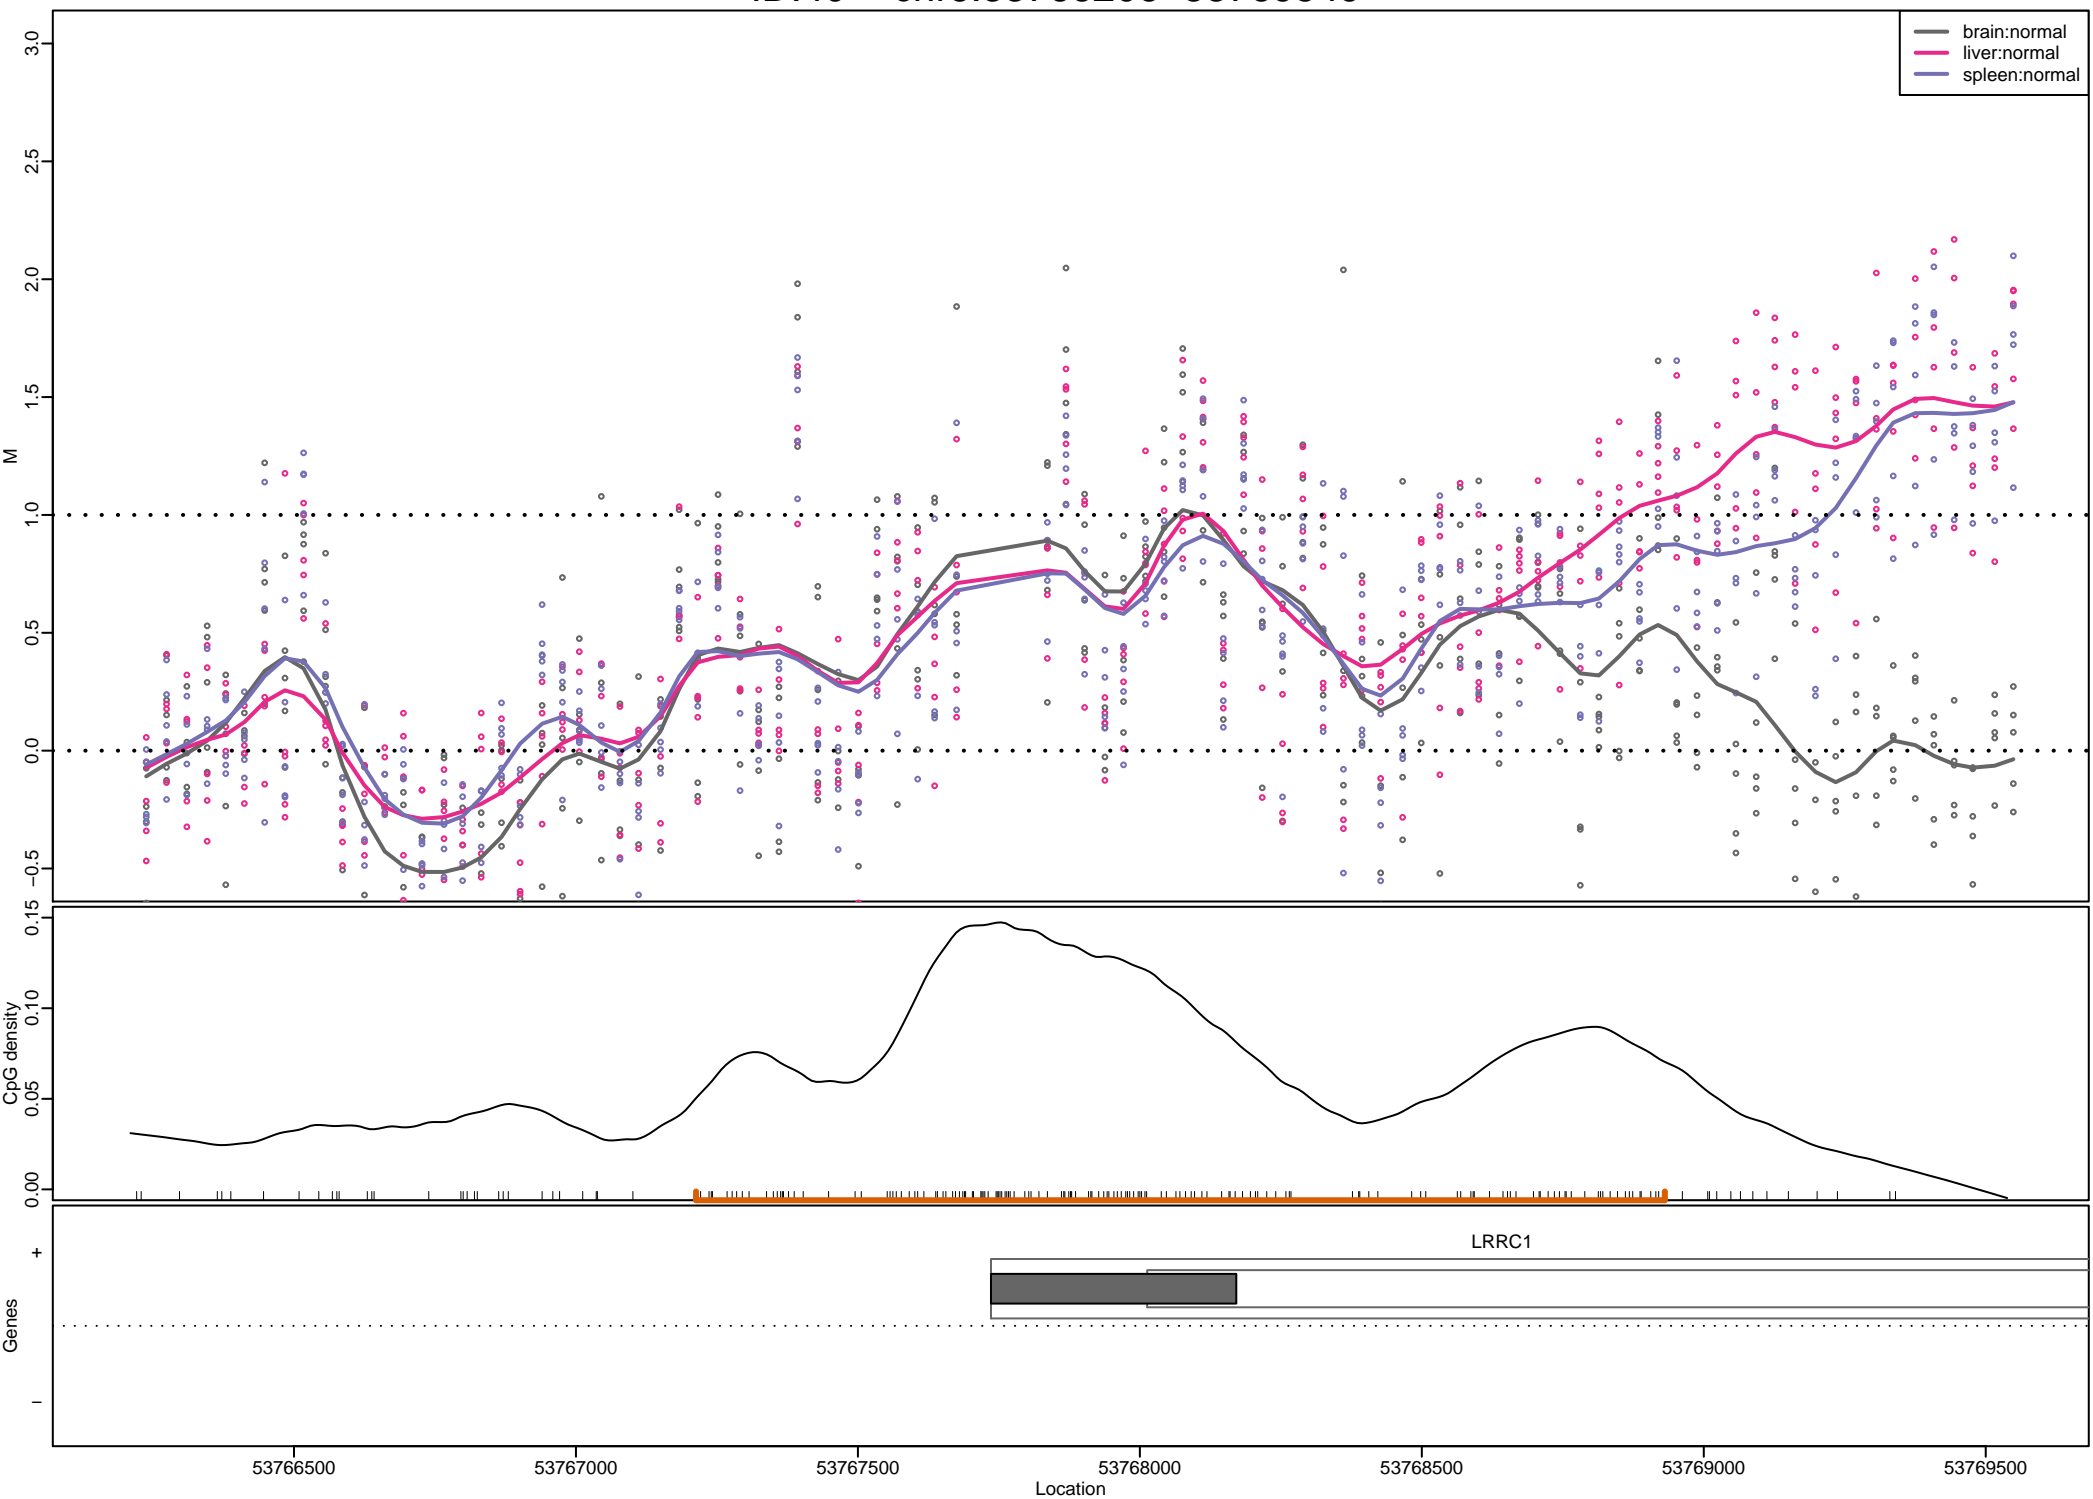

ID:41--chr12:121944796-121948527

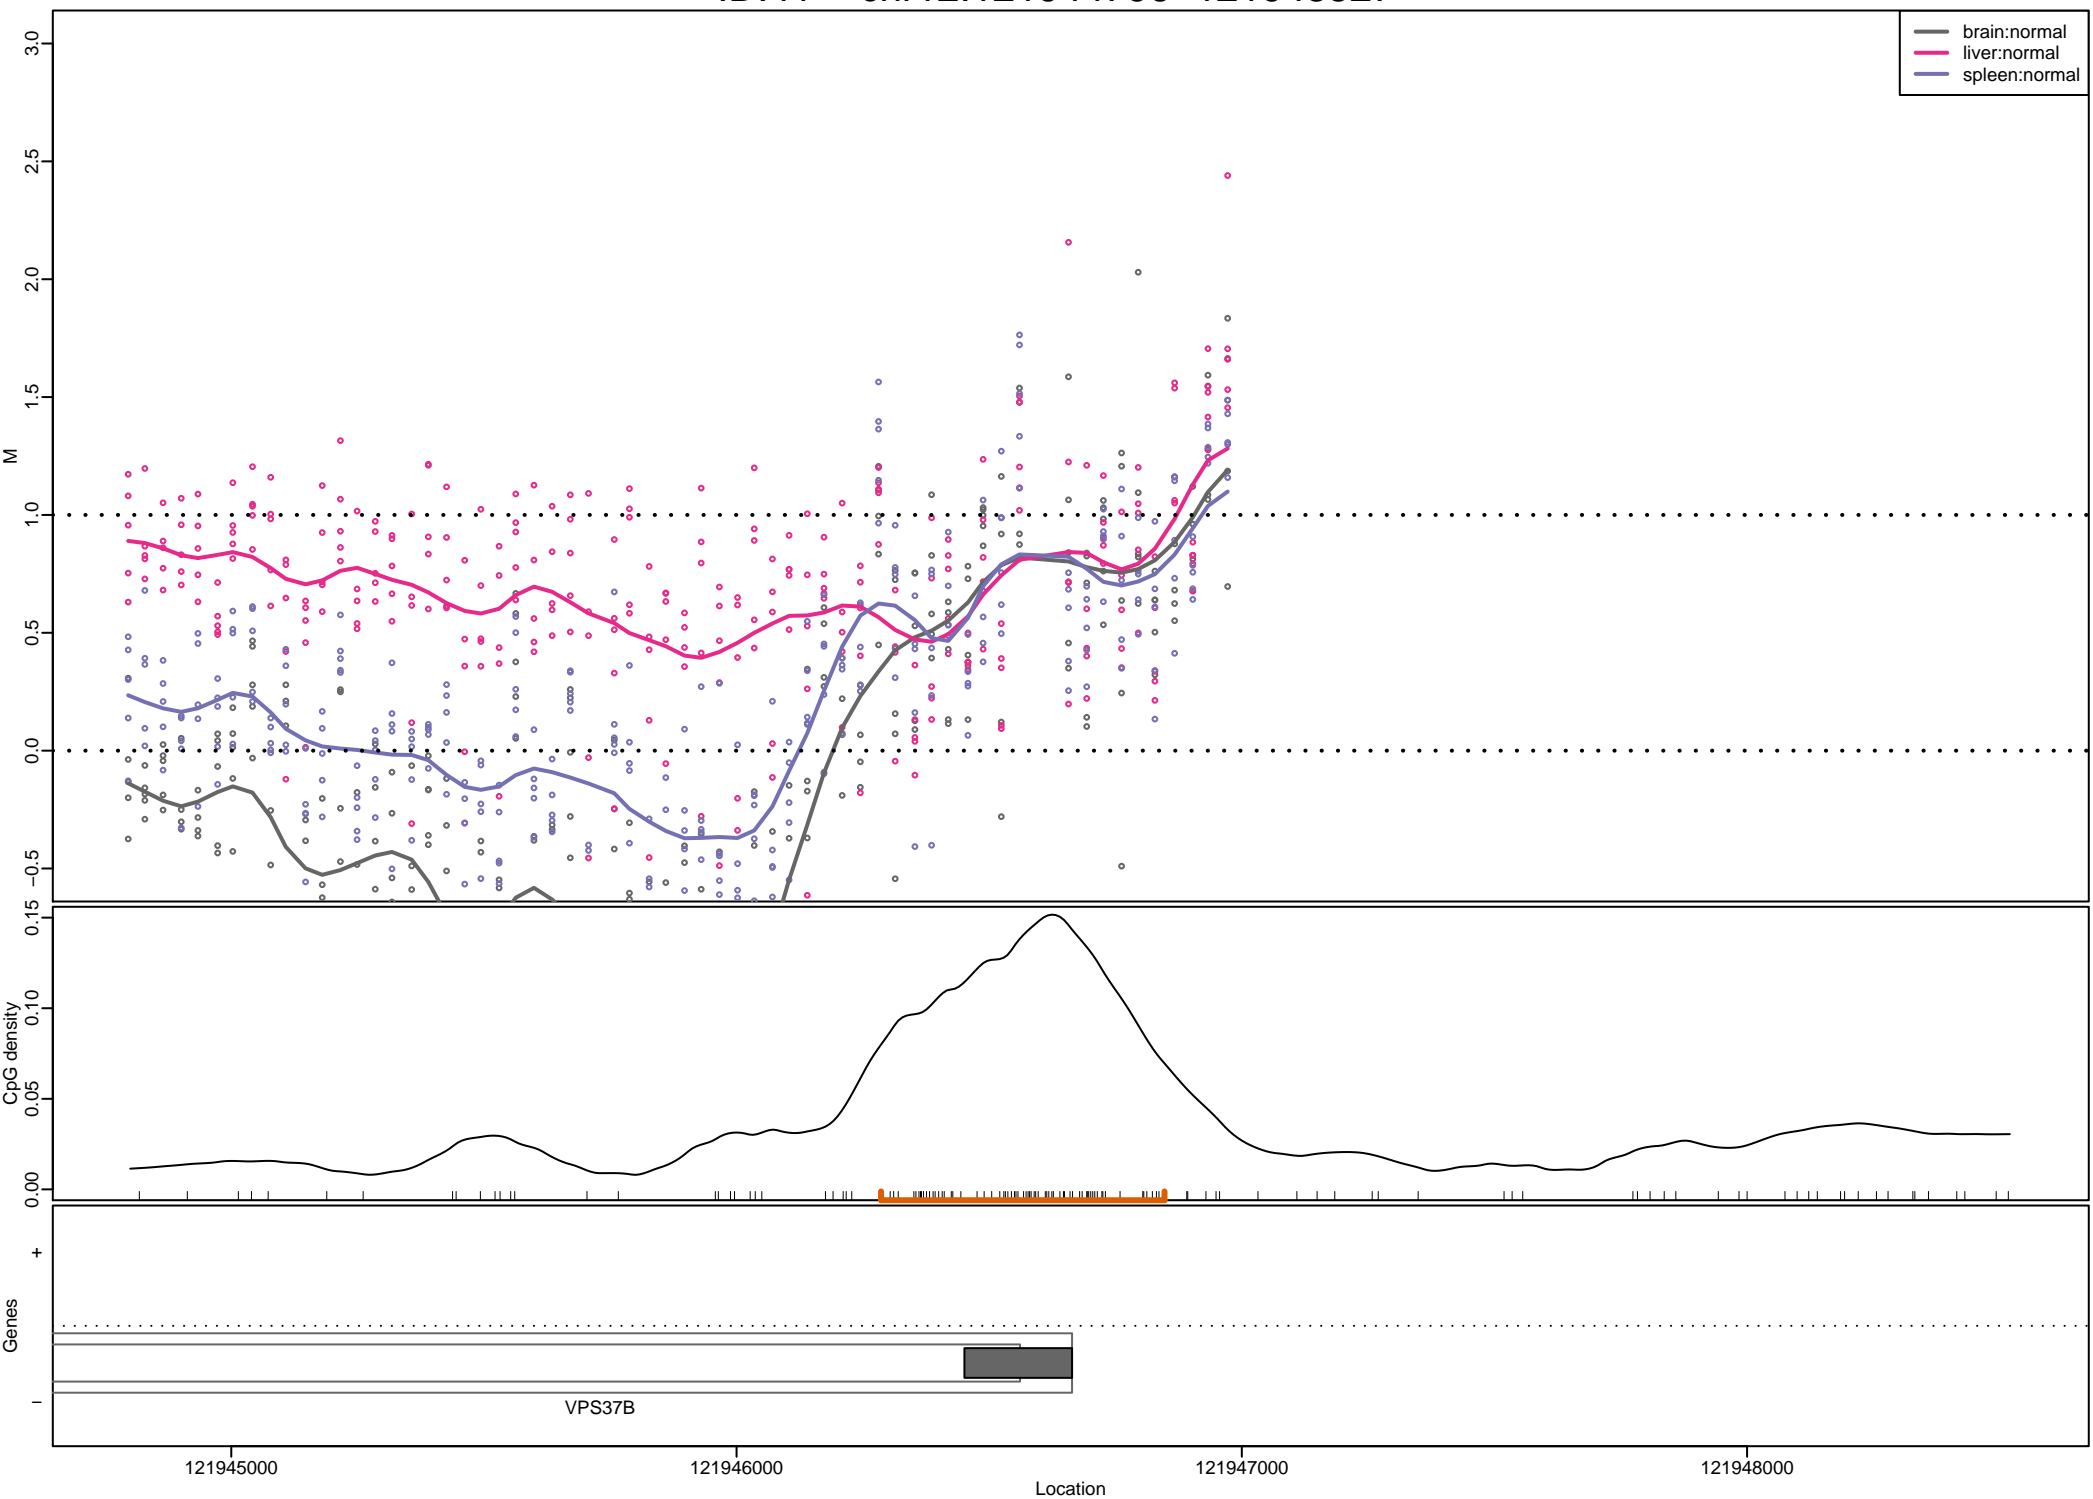

ID:42--chr4:76774190-76775552

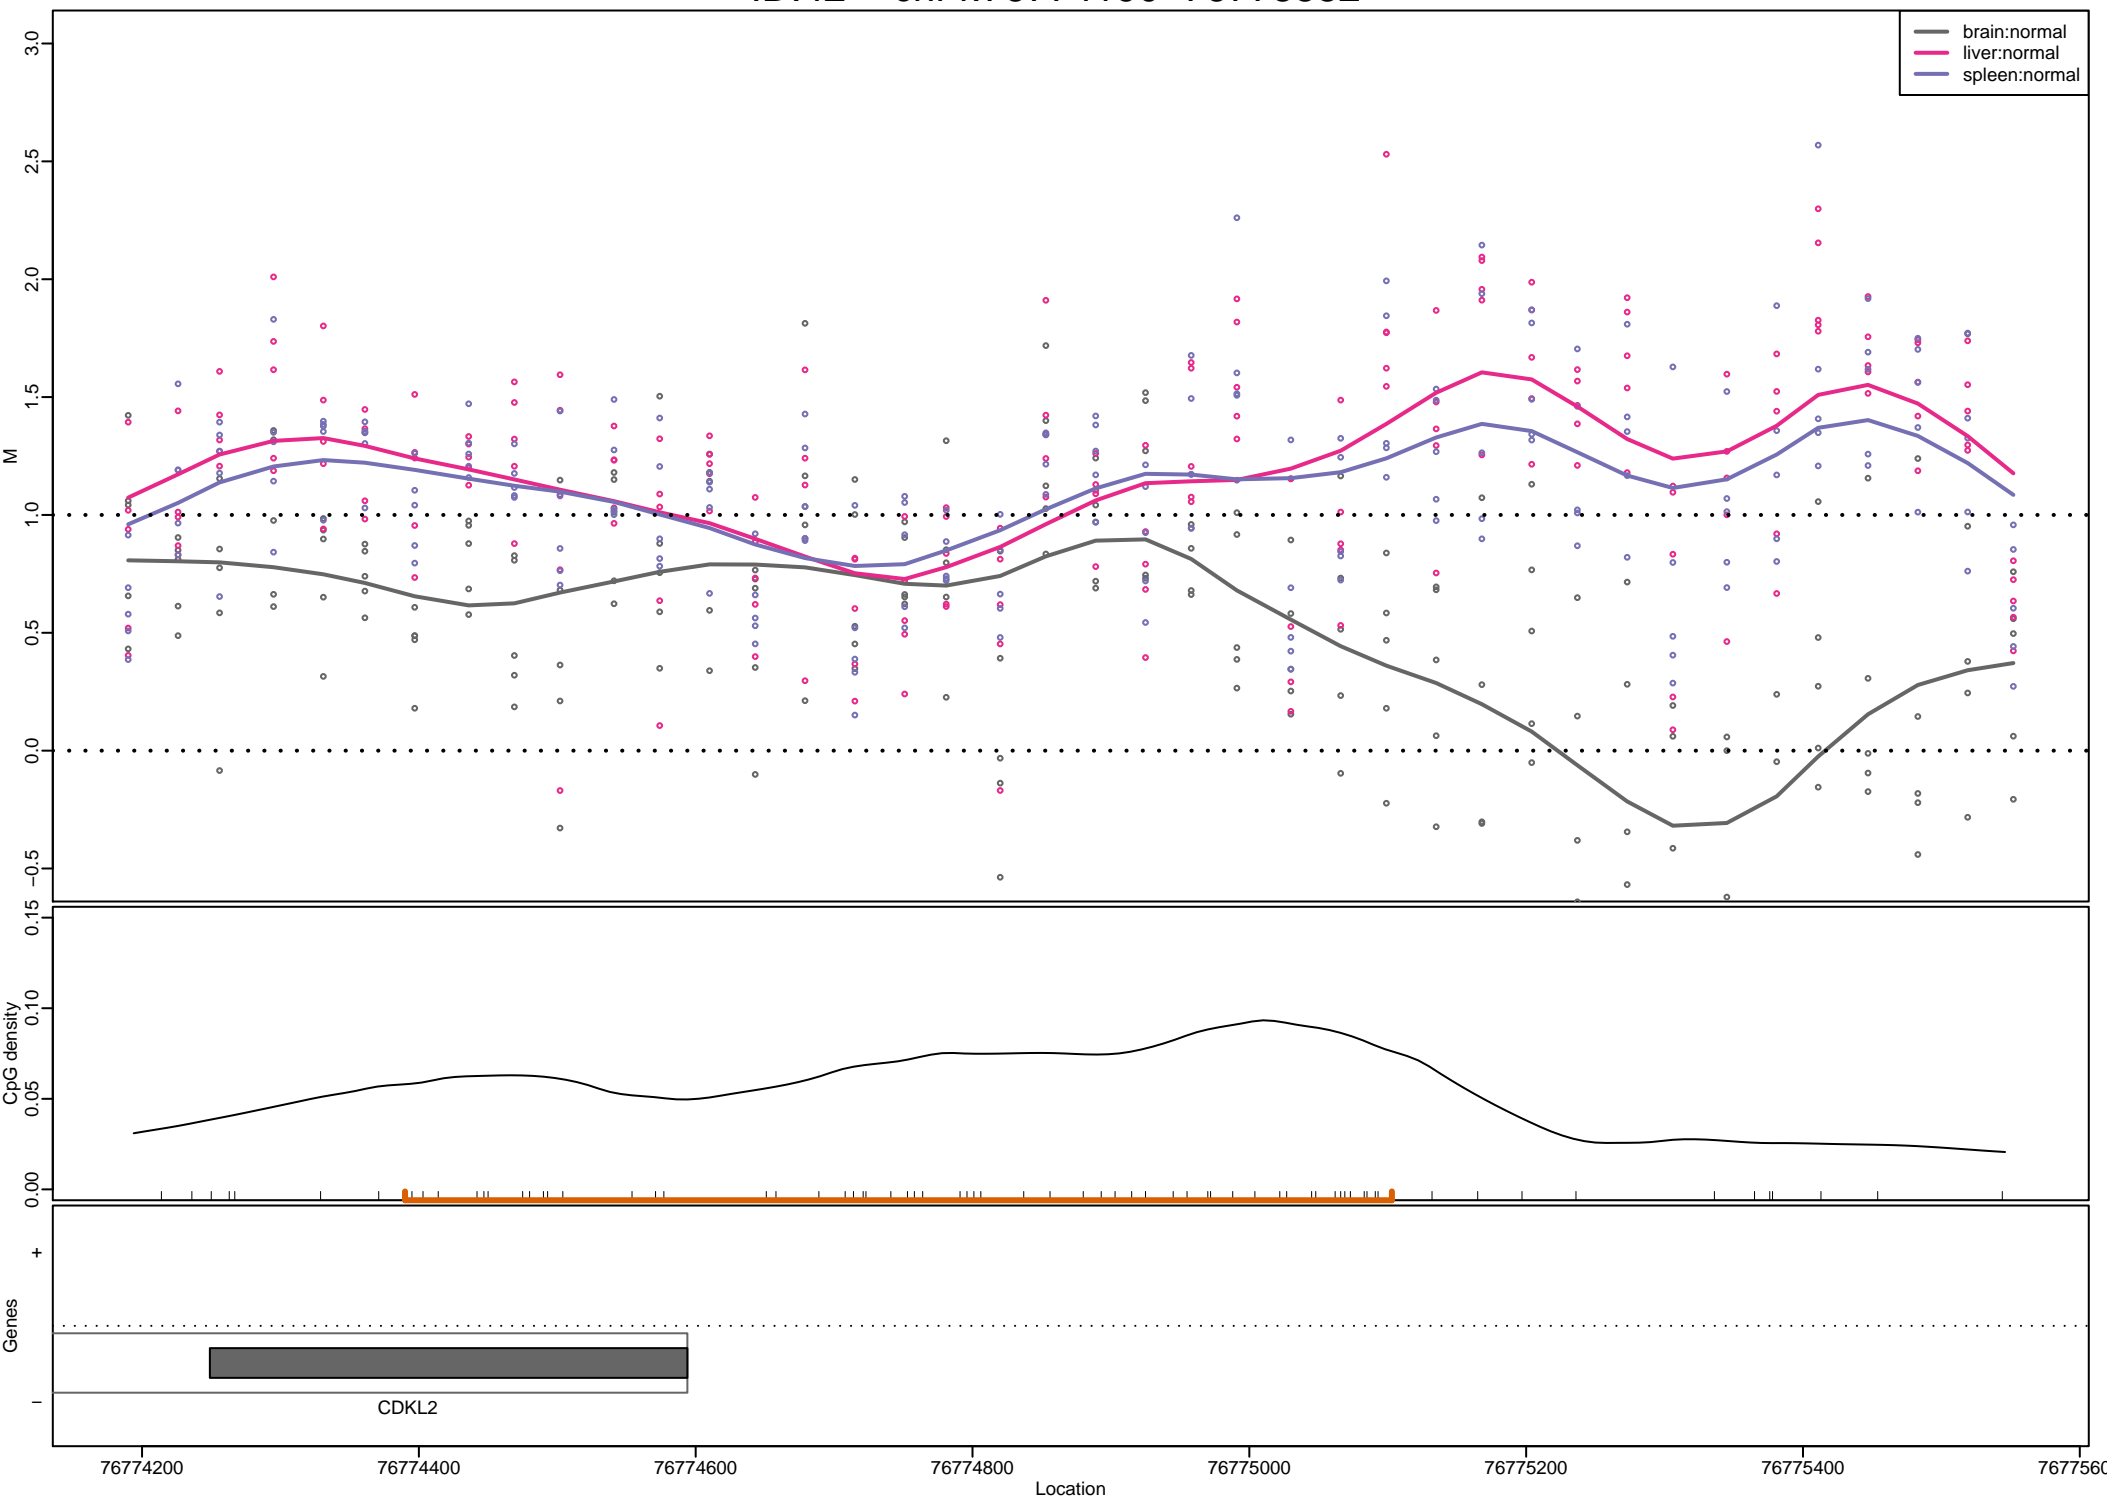

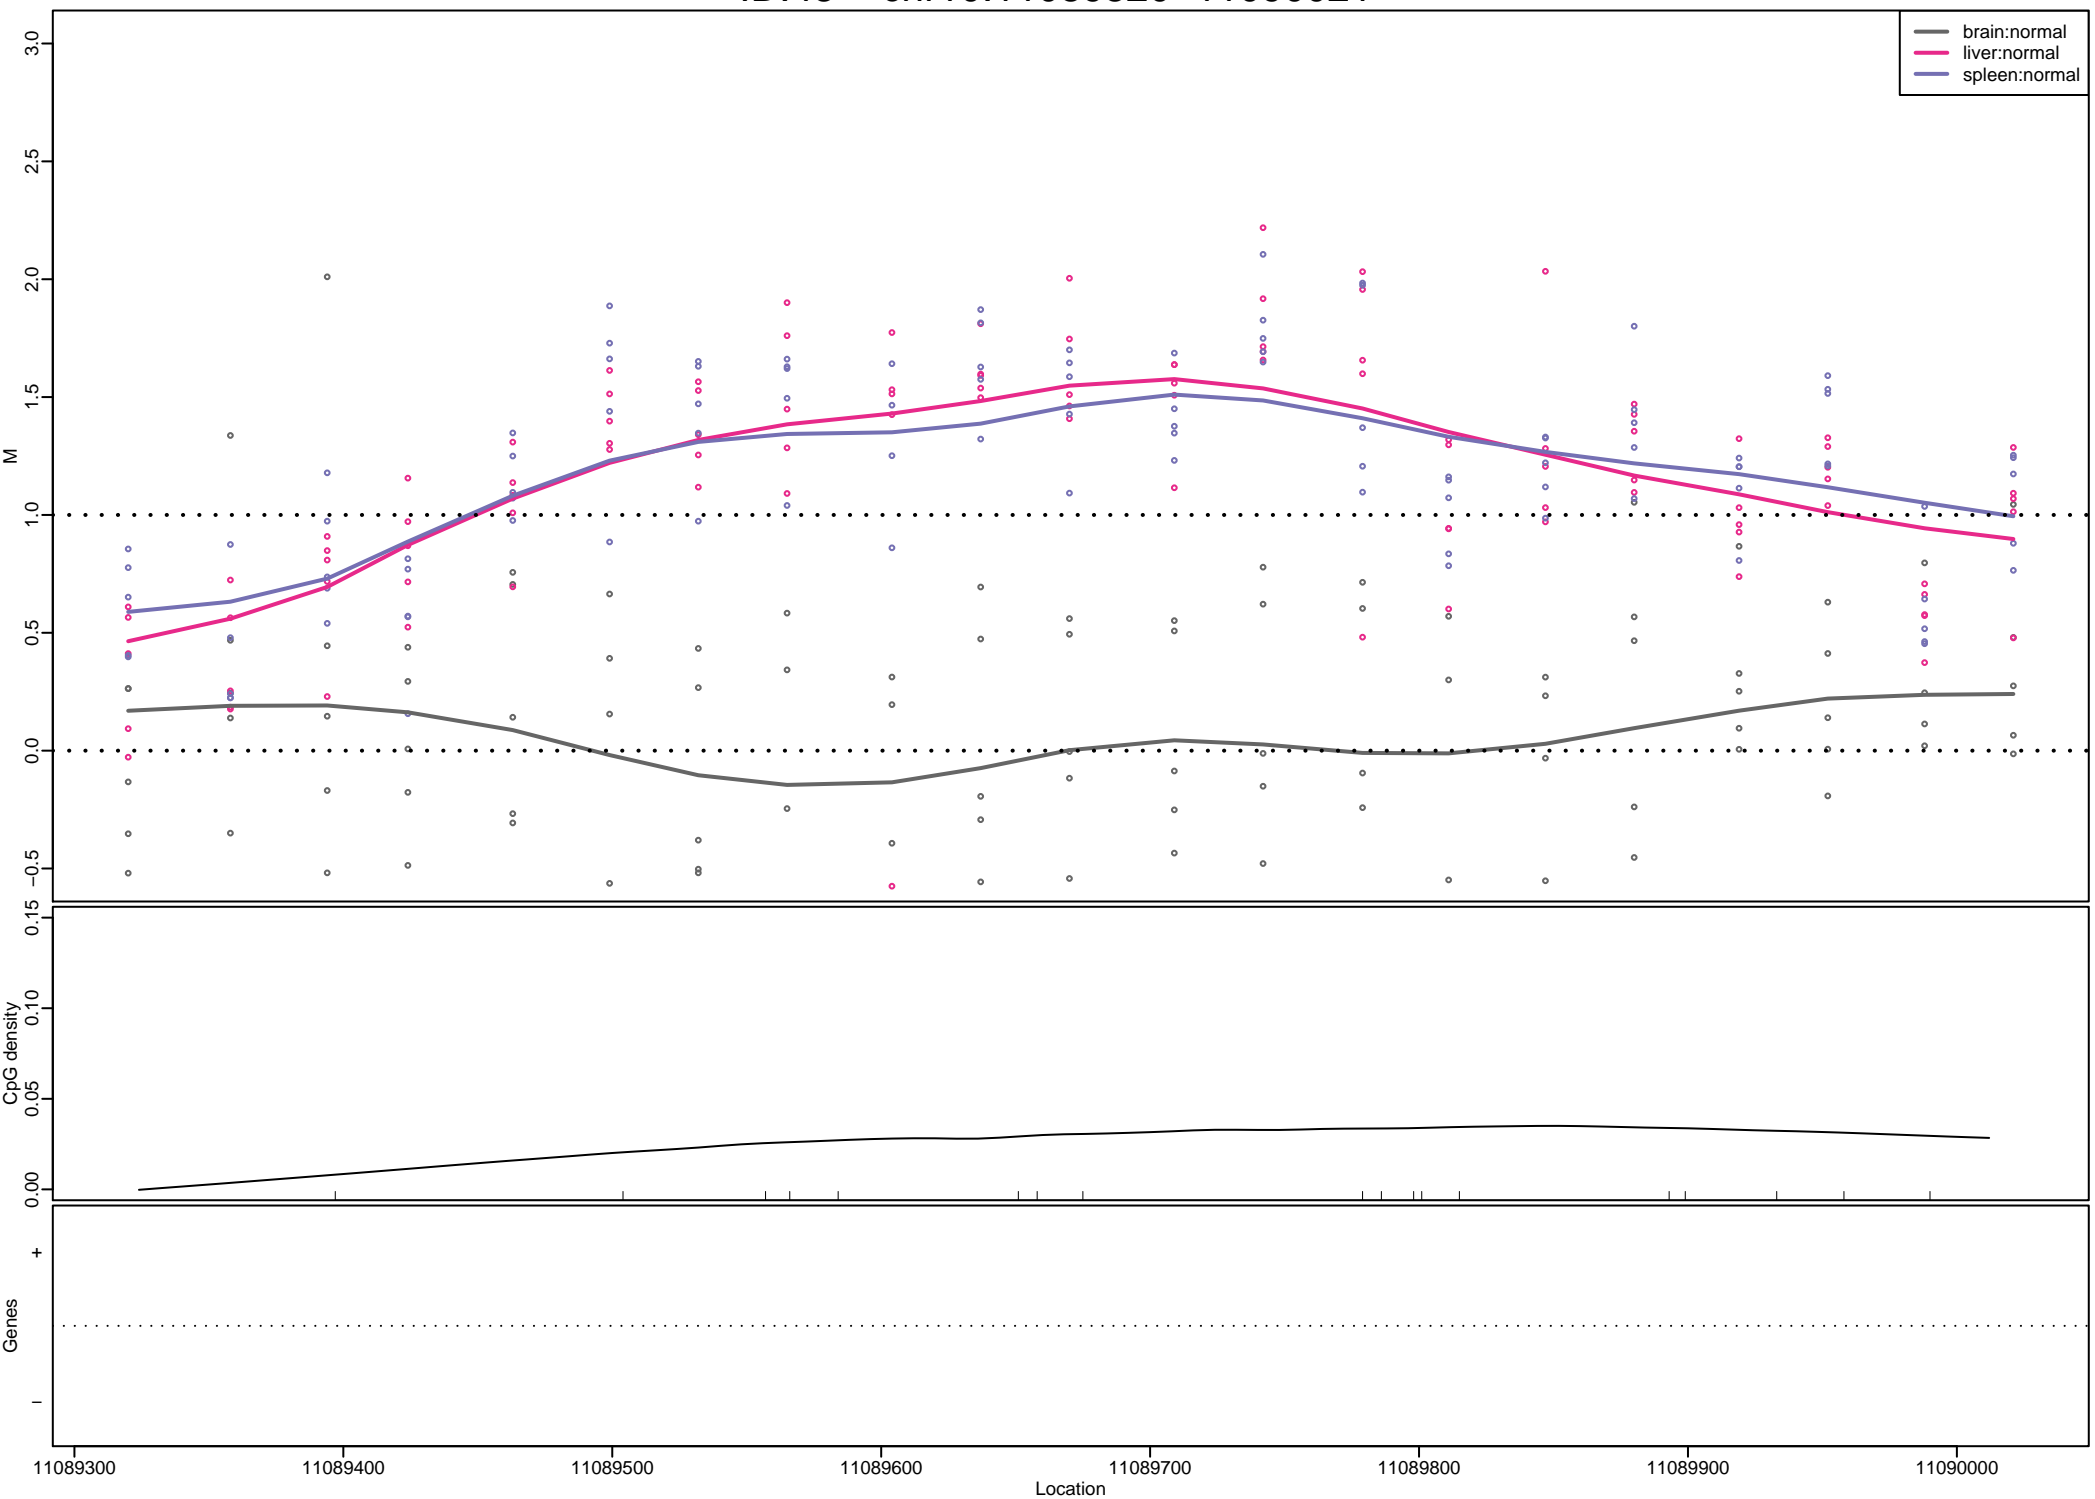

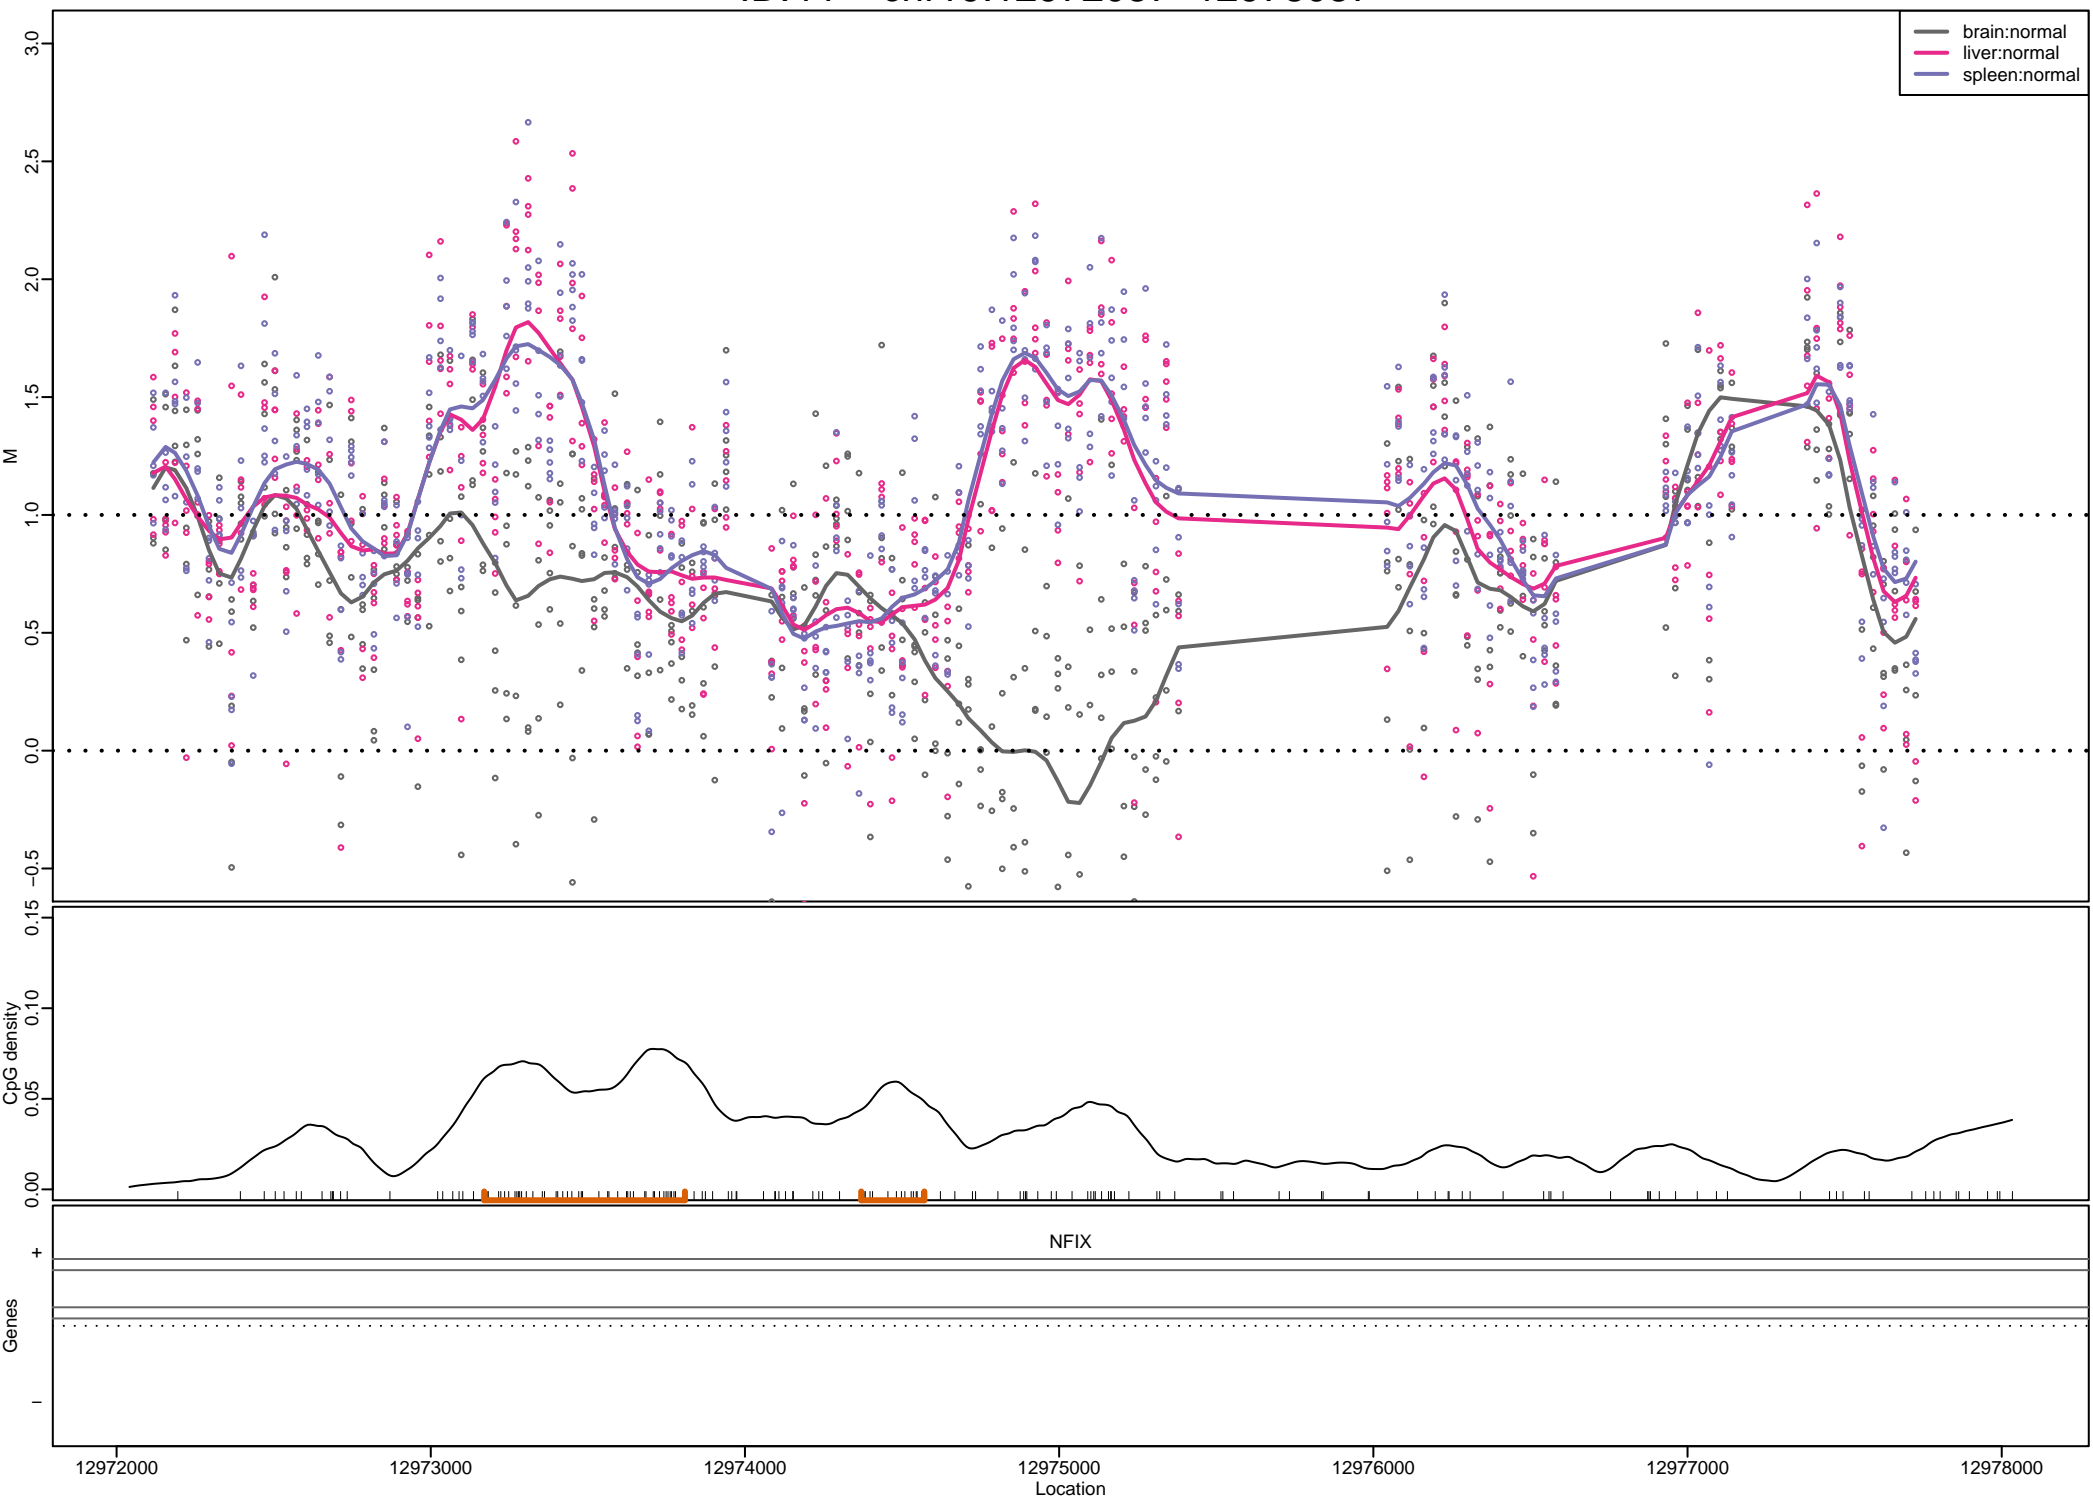

ID:45--chr9:137118562-137123019

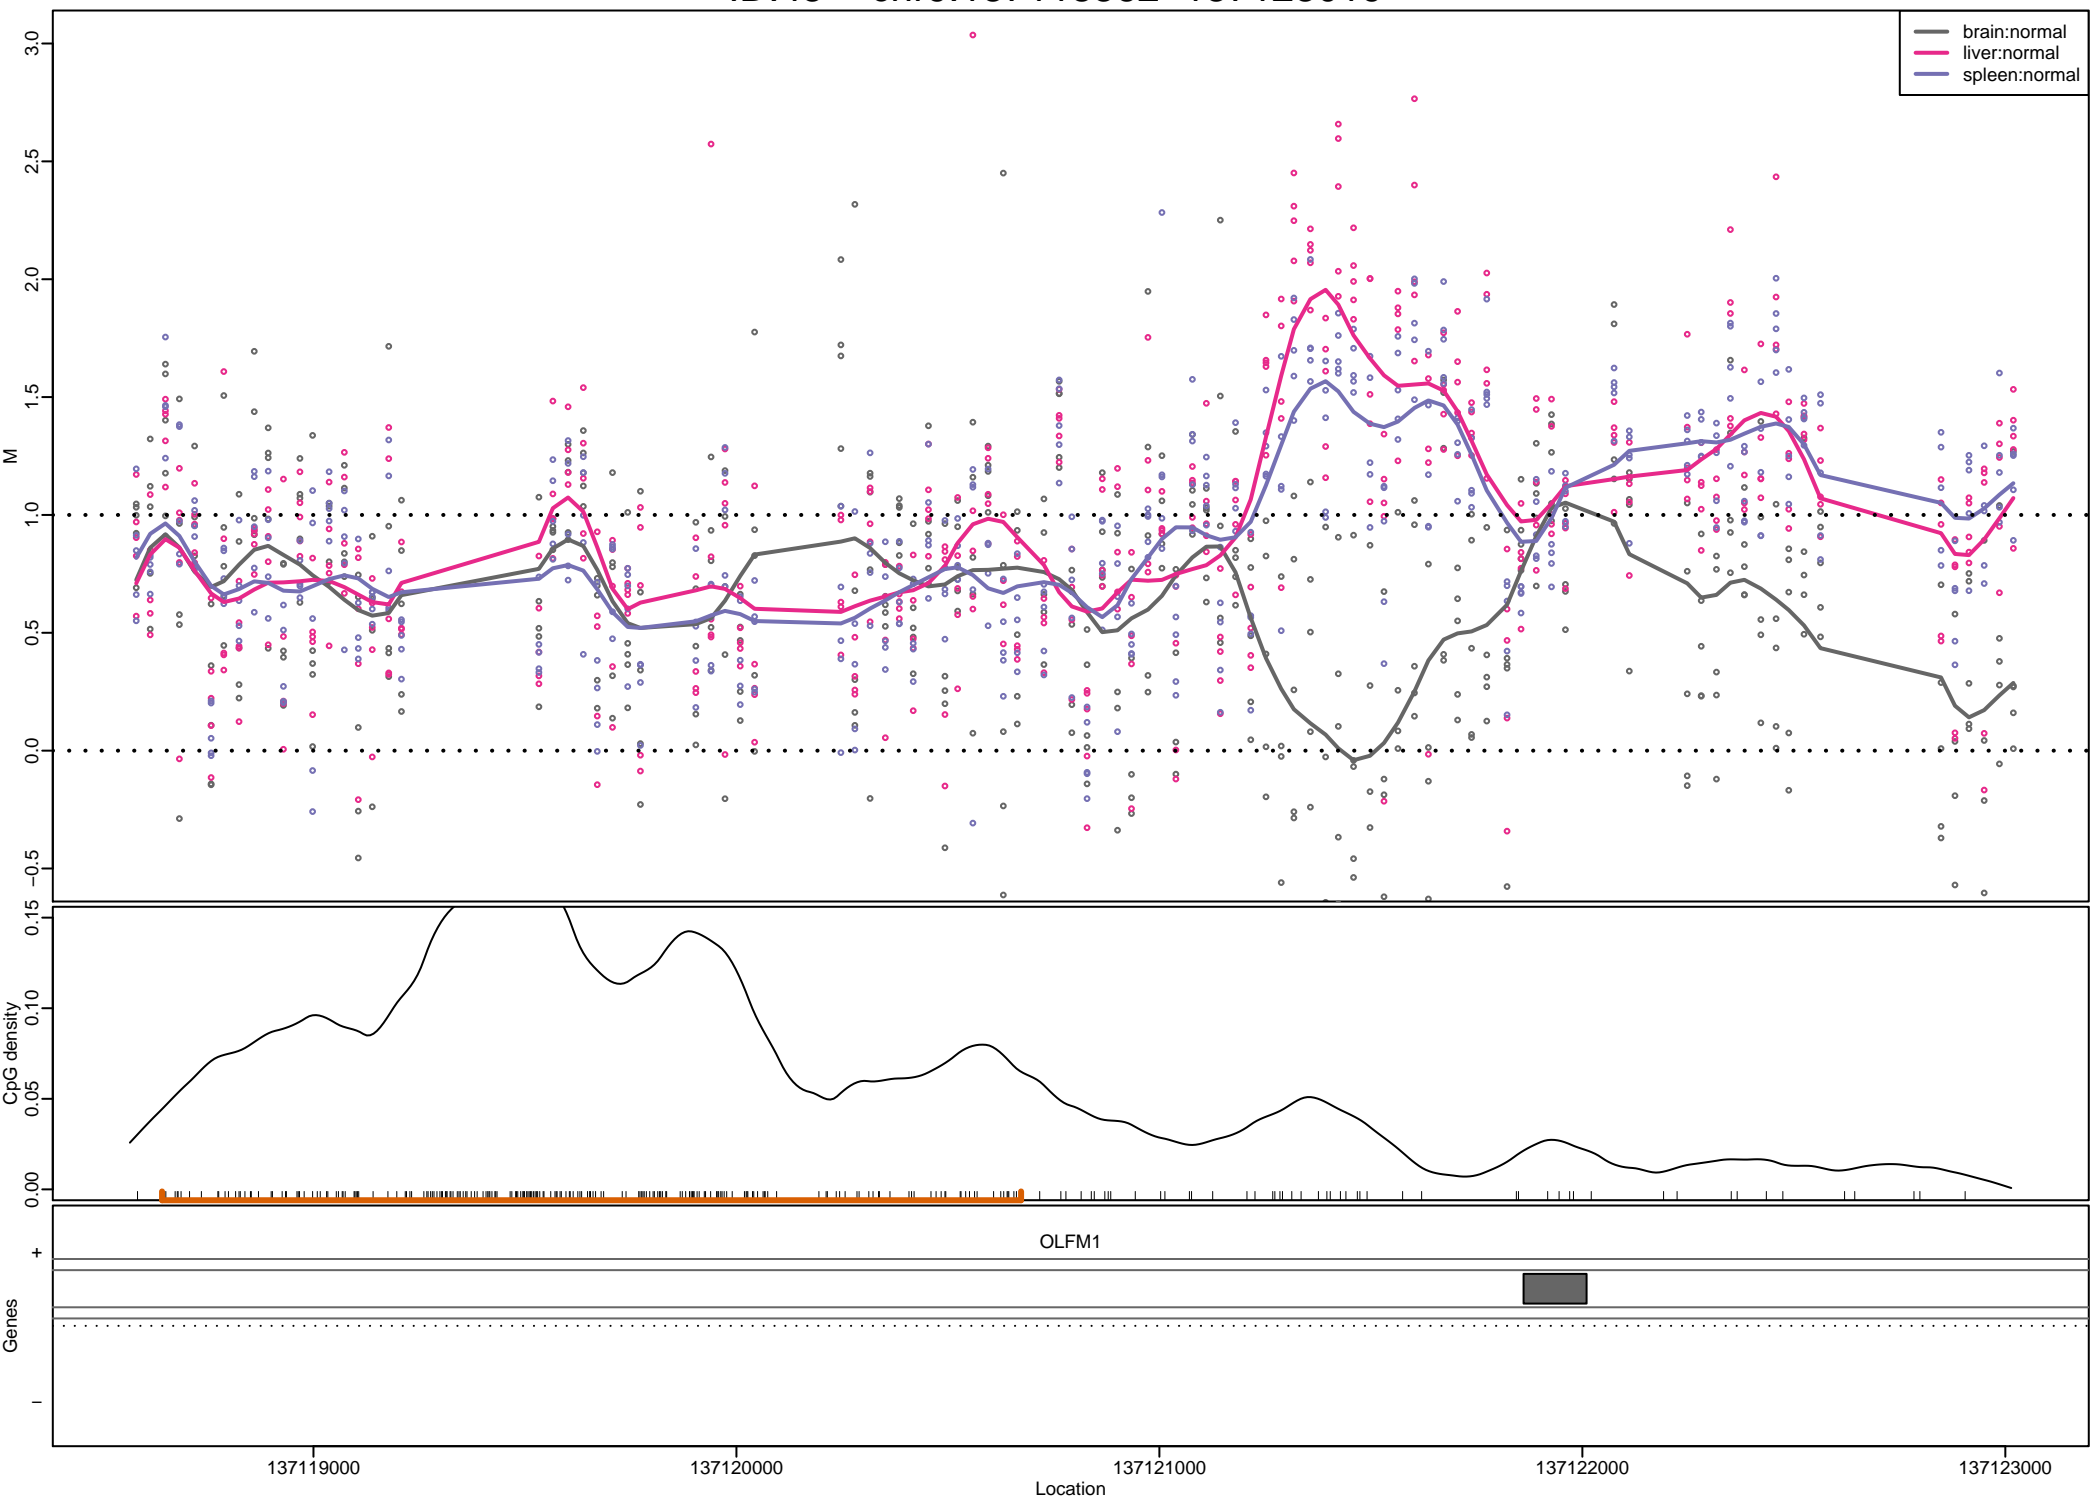

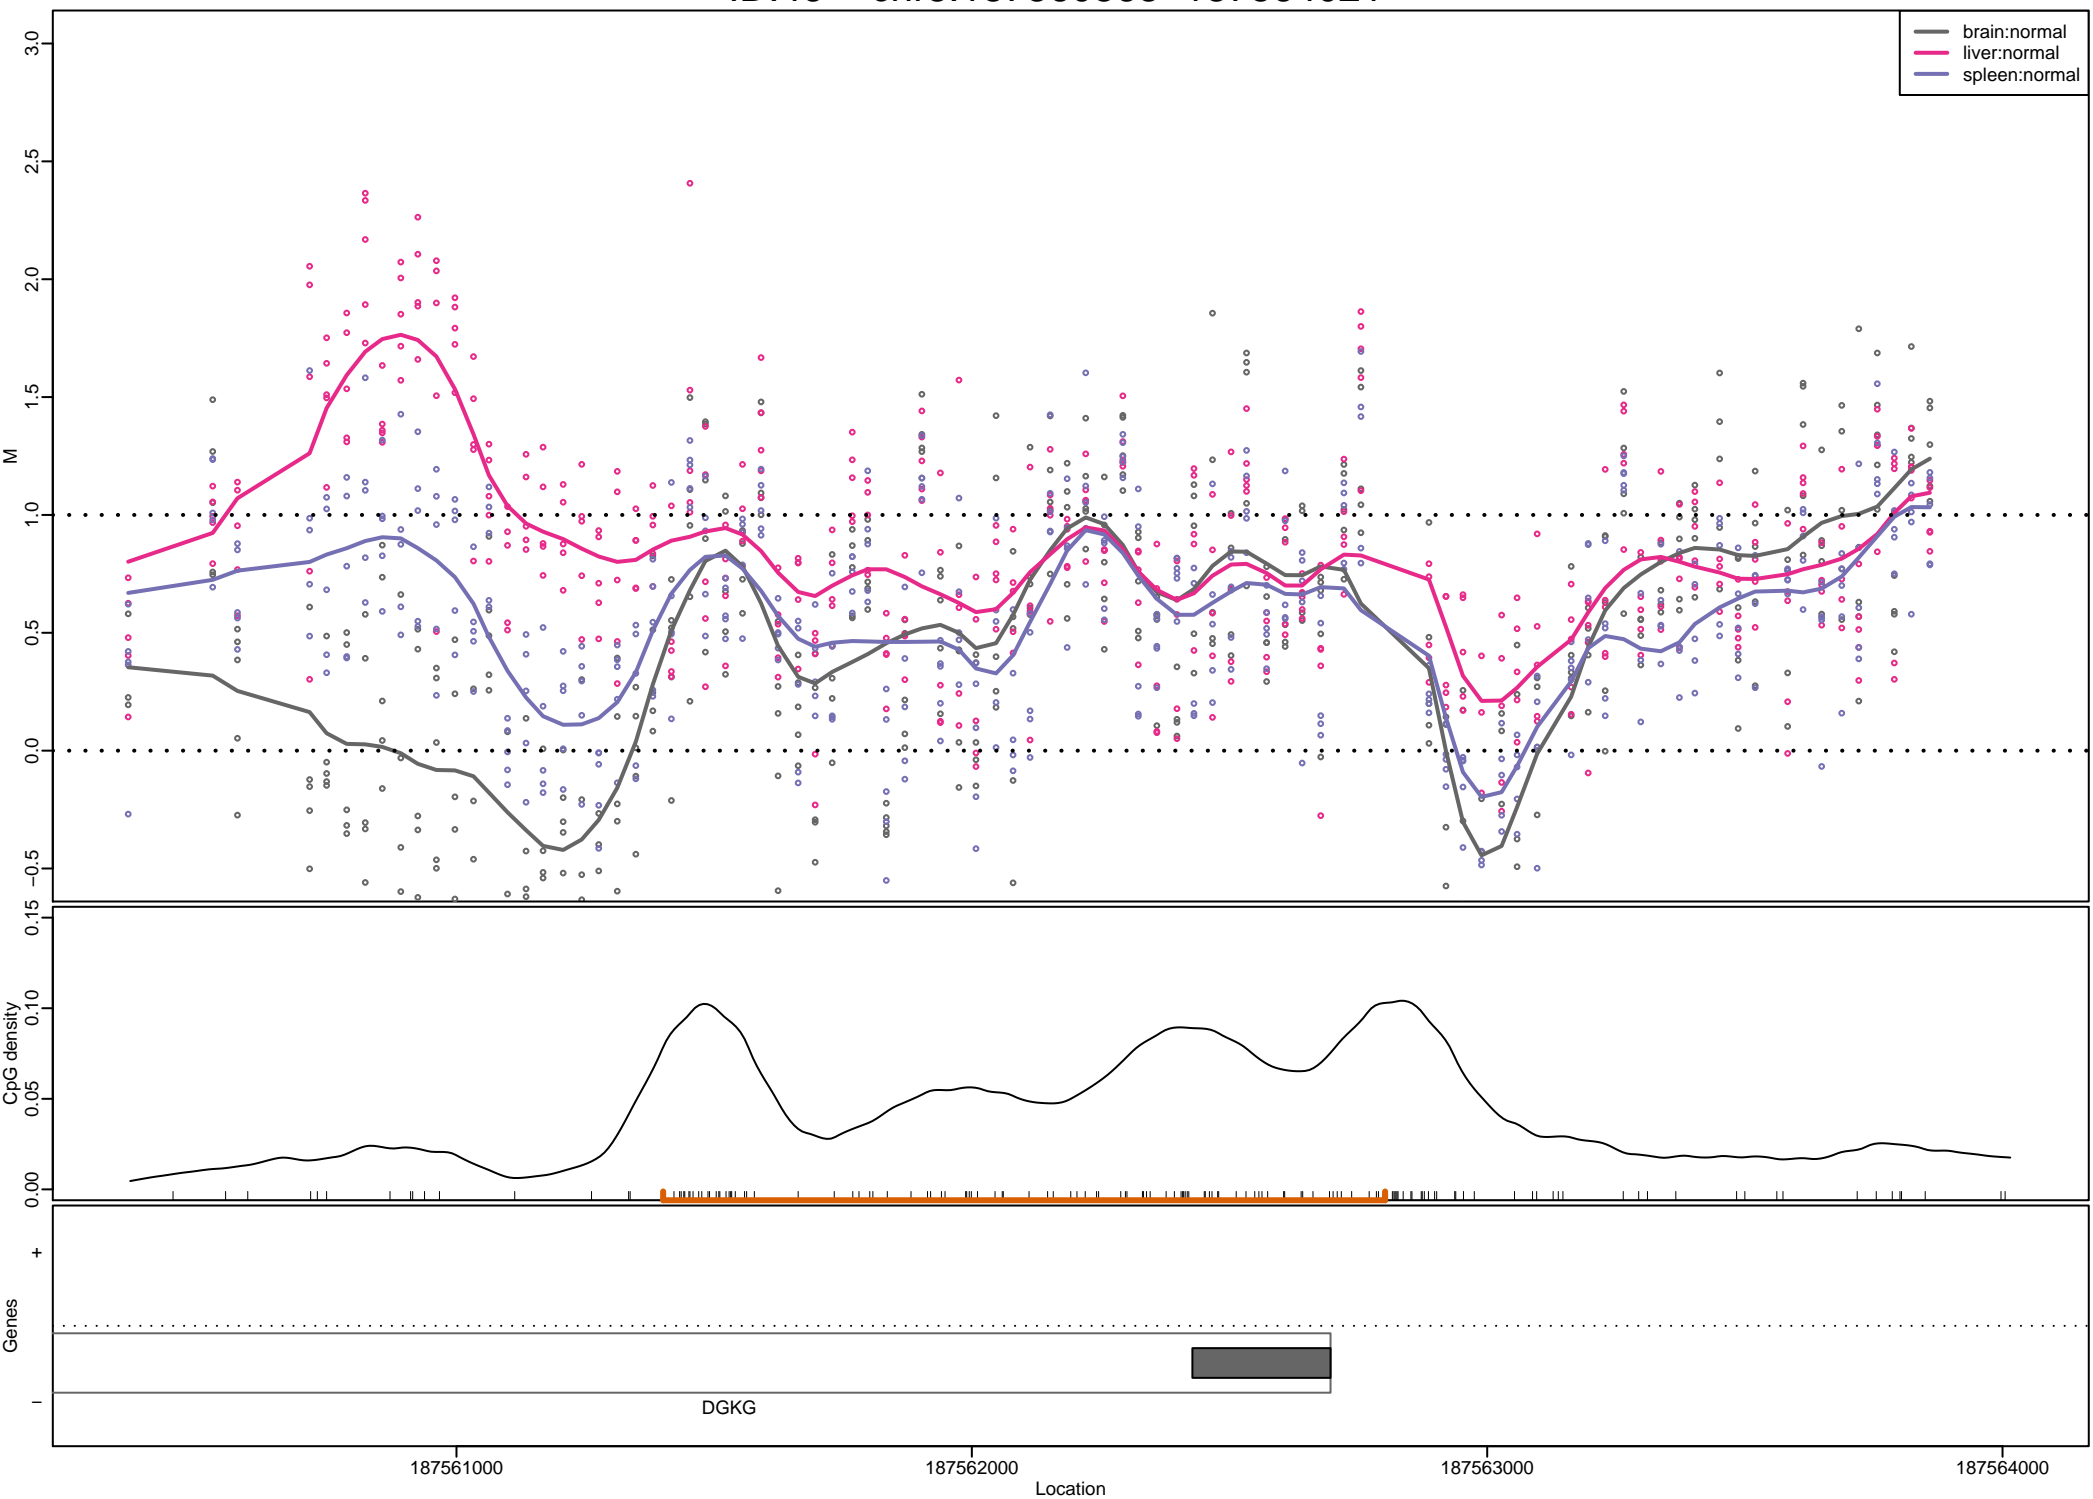

ID:47--chr13:43257042-43260347

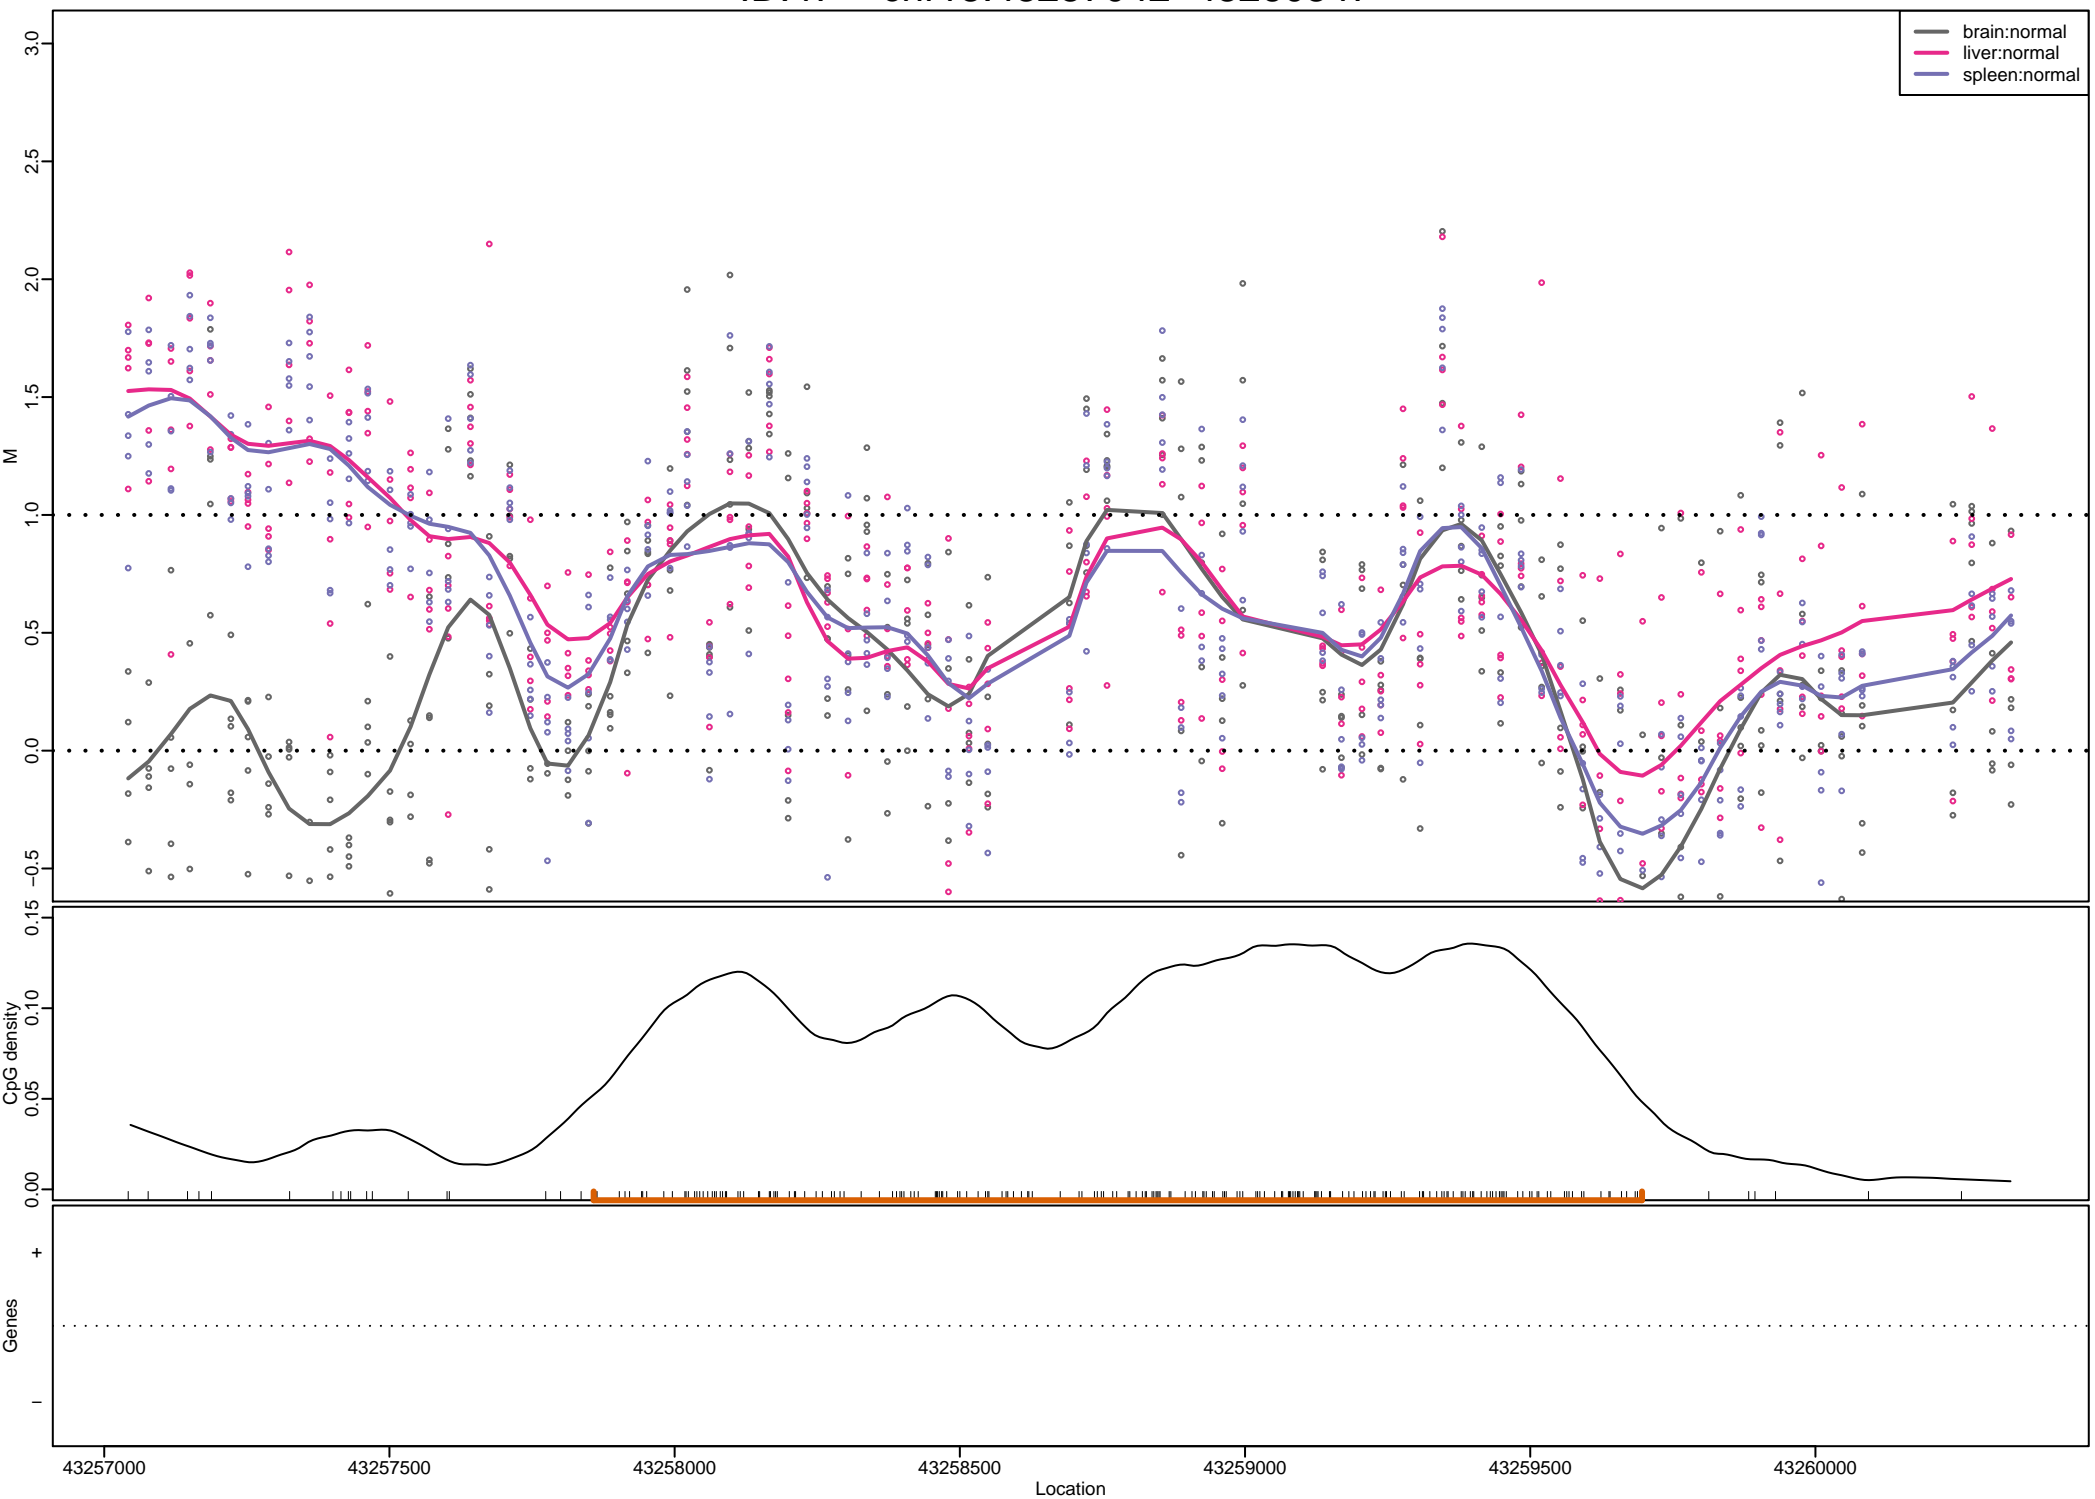

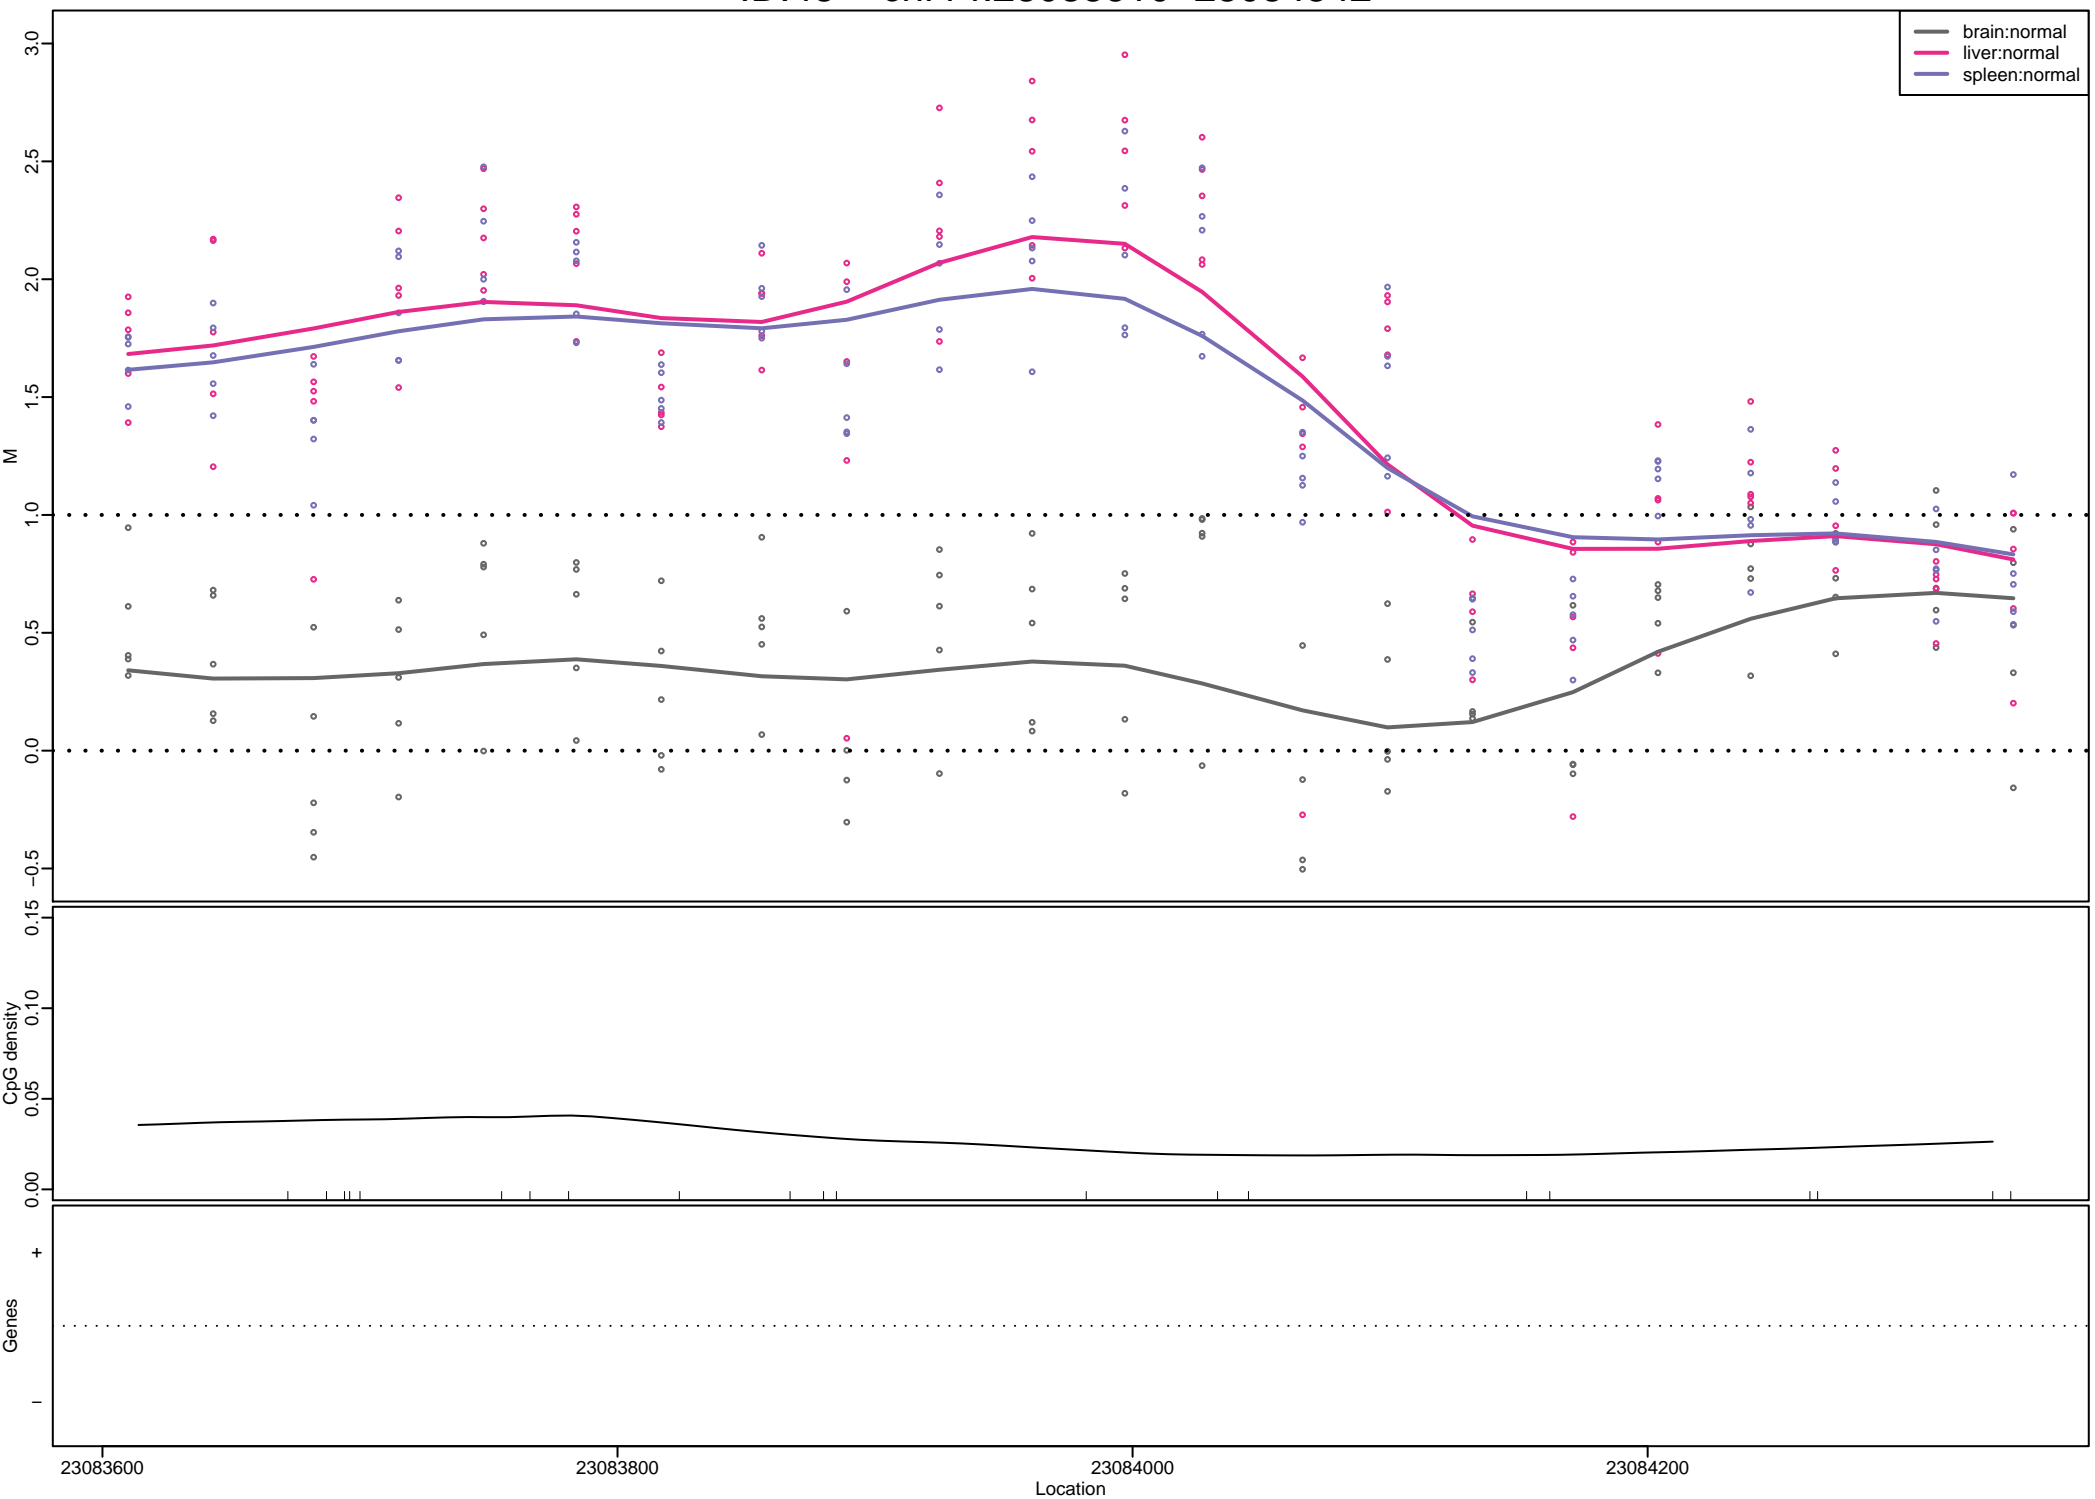

ID:49--chr20:4613441-4616695

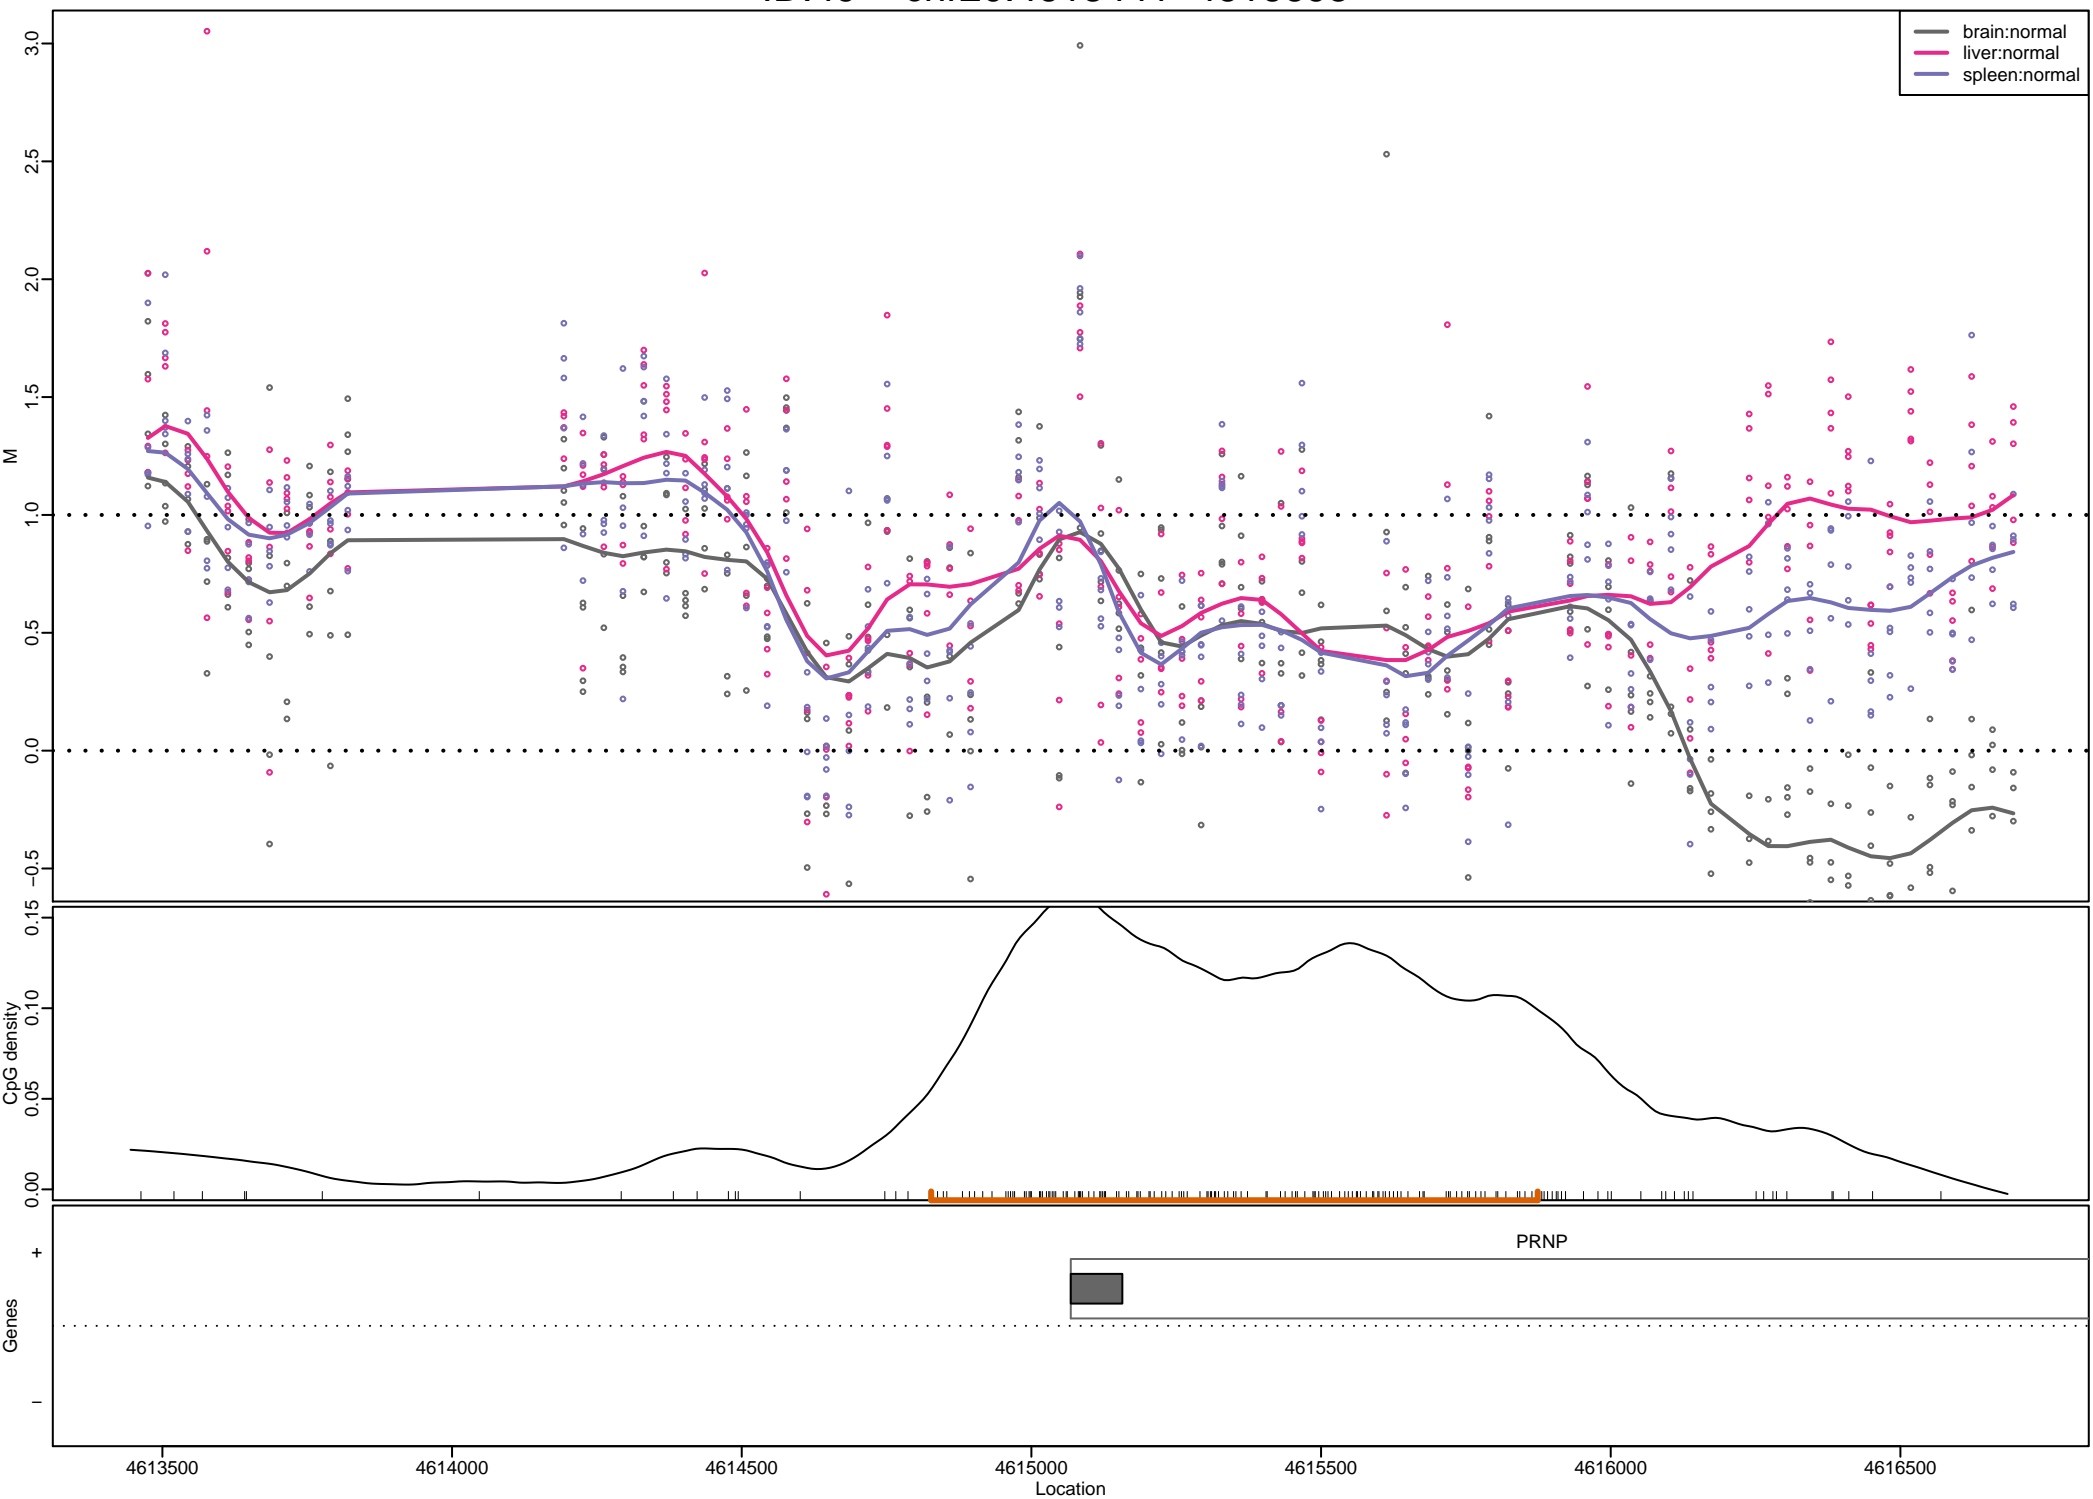

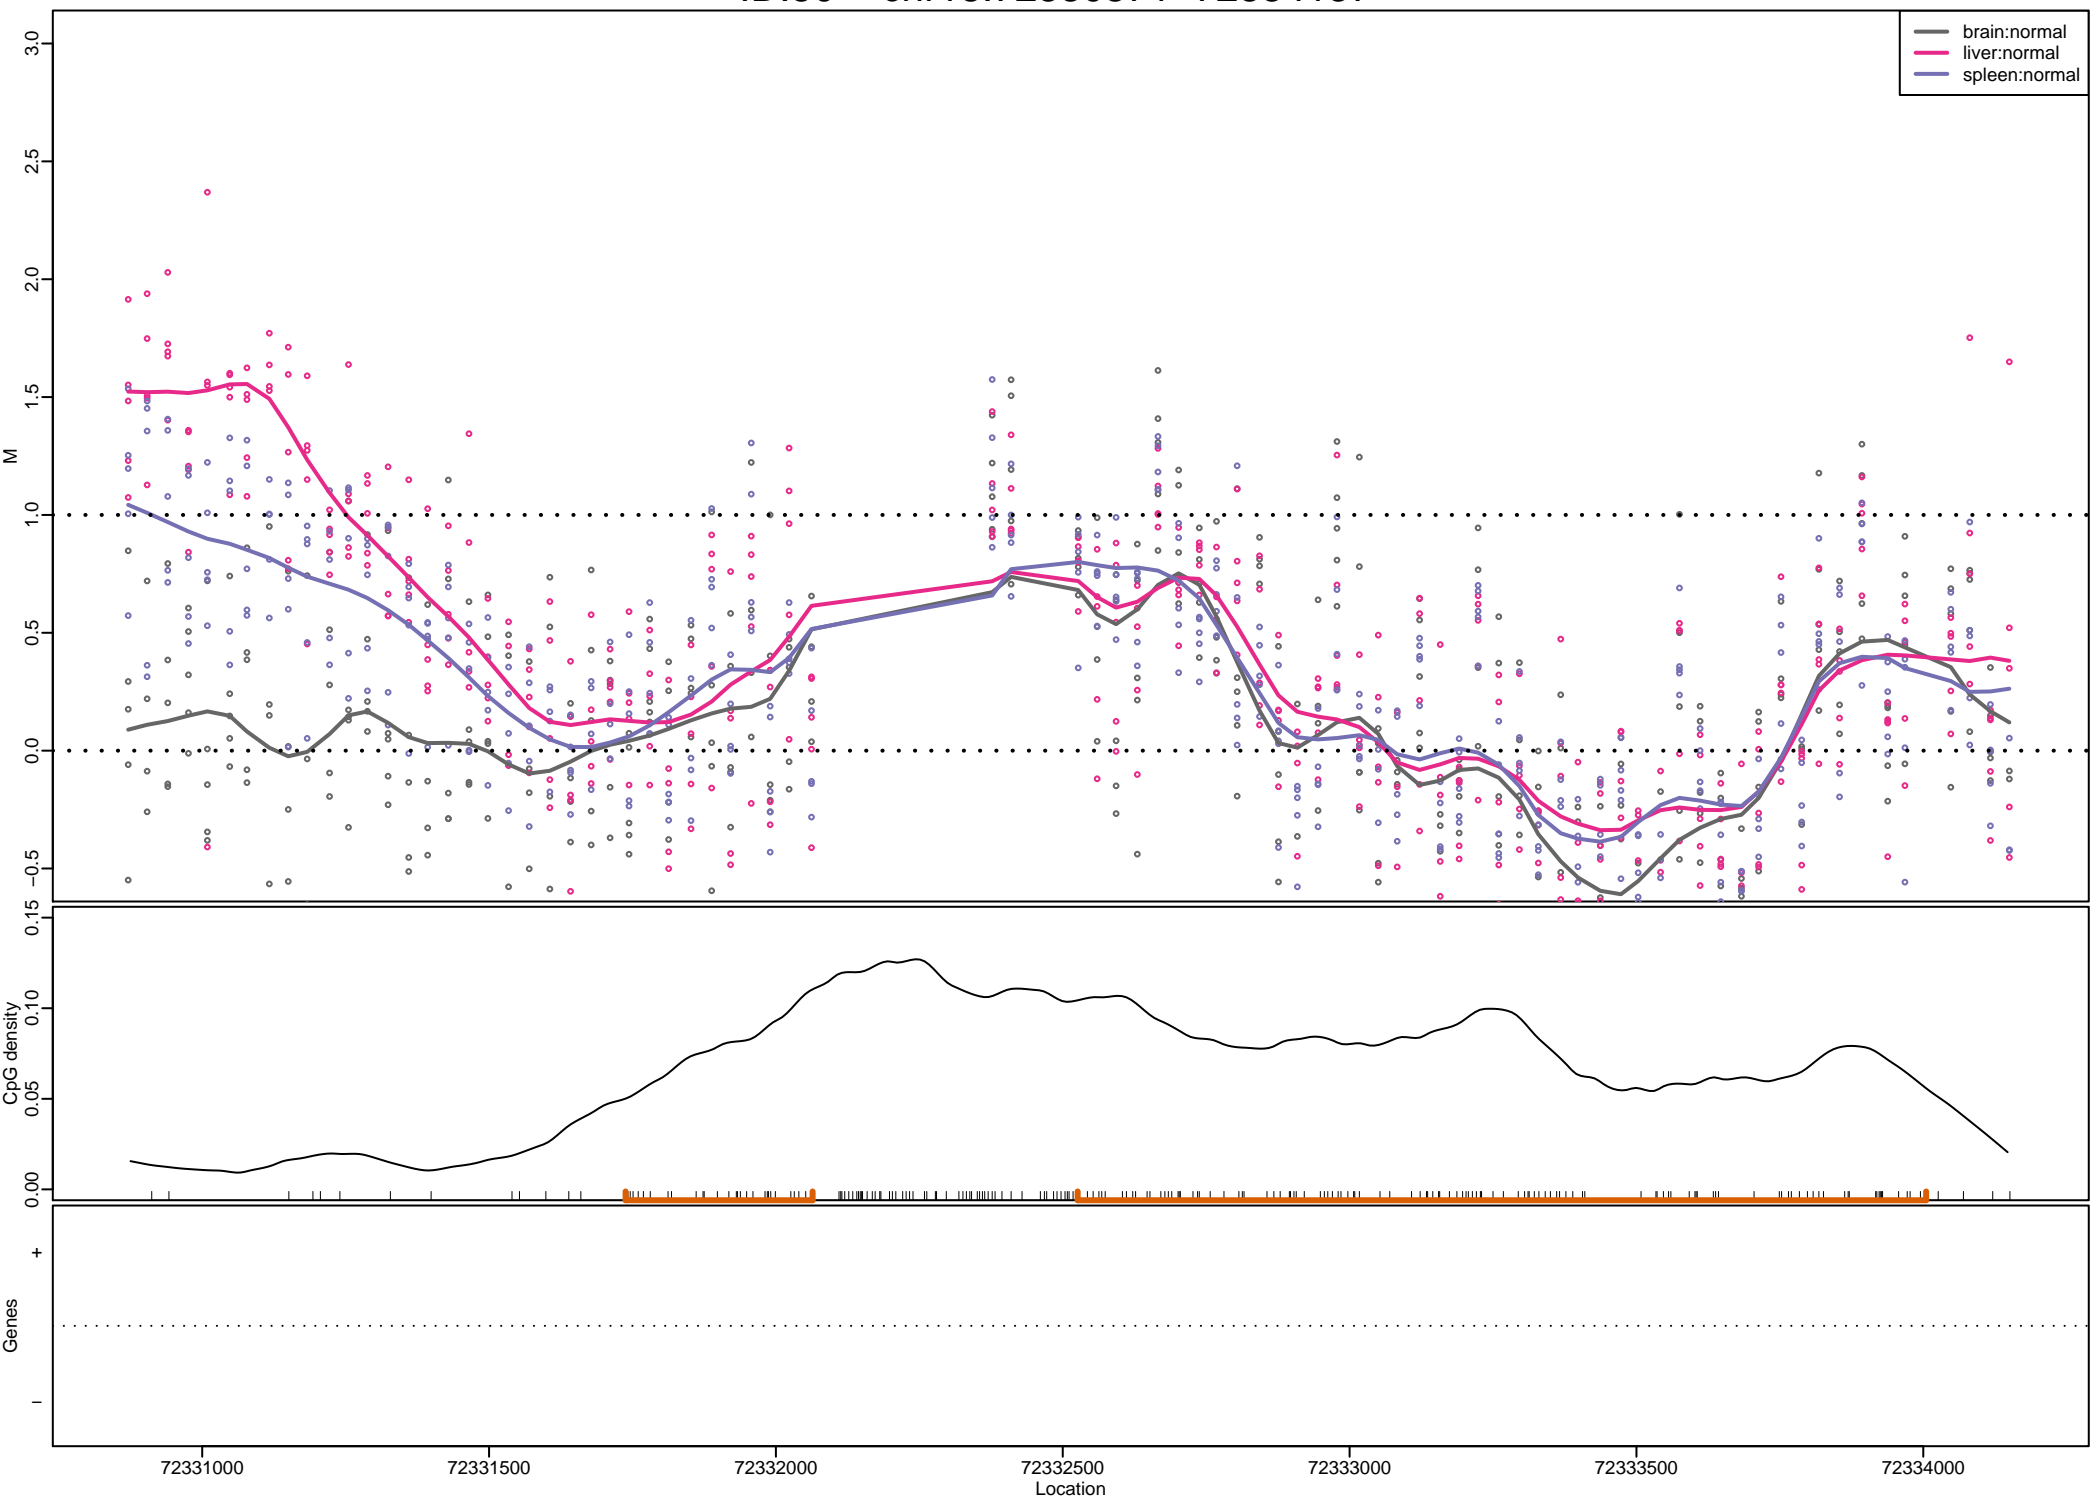

Supplement: NIHMS77908-supplement-2.pdf [file NIHMS77908-supplement-2.pdf]
