# Supplementary material
Source: PubMed Central journal article supplement (PMC2729128)

**Supplementary Figure 4 | Most cancer-specific differential DNA methylation is located at CpG island shores.** The top 50 C-DMRs, ordered by statistical significance. Displays are as in Fig. 1b. The upper panels are plots of  $M$  value versus genomic location for brain (grey), liver (pink), spleen (purple), normal colon (green), and colon cancer (orange). Each point (shown only for normal colon and colon cancer) represents the methylation level of an individual sample for a given probe. The curve represents averaged smoothed  $M$  values, described in detail in the Methods. Due to the scale and standardization used,  $M$  values which range from  $-0.5$  to  $0.5$  represent unmethylated sites as defined by the control probes, and values from  $0.5$  to  $1.5$  represent baseline levels of methylation. The middle panels provide the location of CpG dinucleotides with black tick marks on the x-axis. CpG density was calculated across the region using a standard density estimator and is represented by the smoothed black line. The location of the CpG island is denoted on the x-axis as an orange line. The lower panels provide gene annotation for the genomic region. The thin outer grey line represents the transcript, the thin inner lines represent a coding region. Filled in grey boxes represent exons. On the y-axis, plus and minus marks denote sense and antisense gene transcription respectively.

ID:1--chr10:5774134-5775430

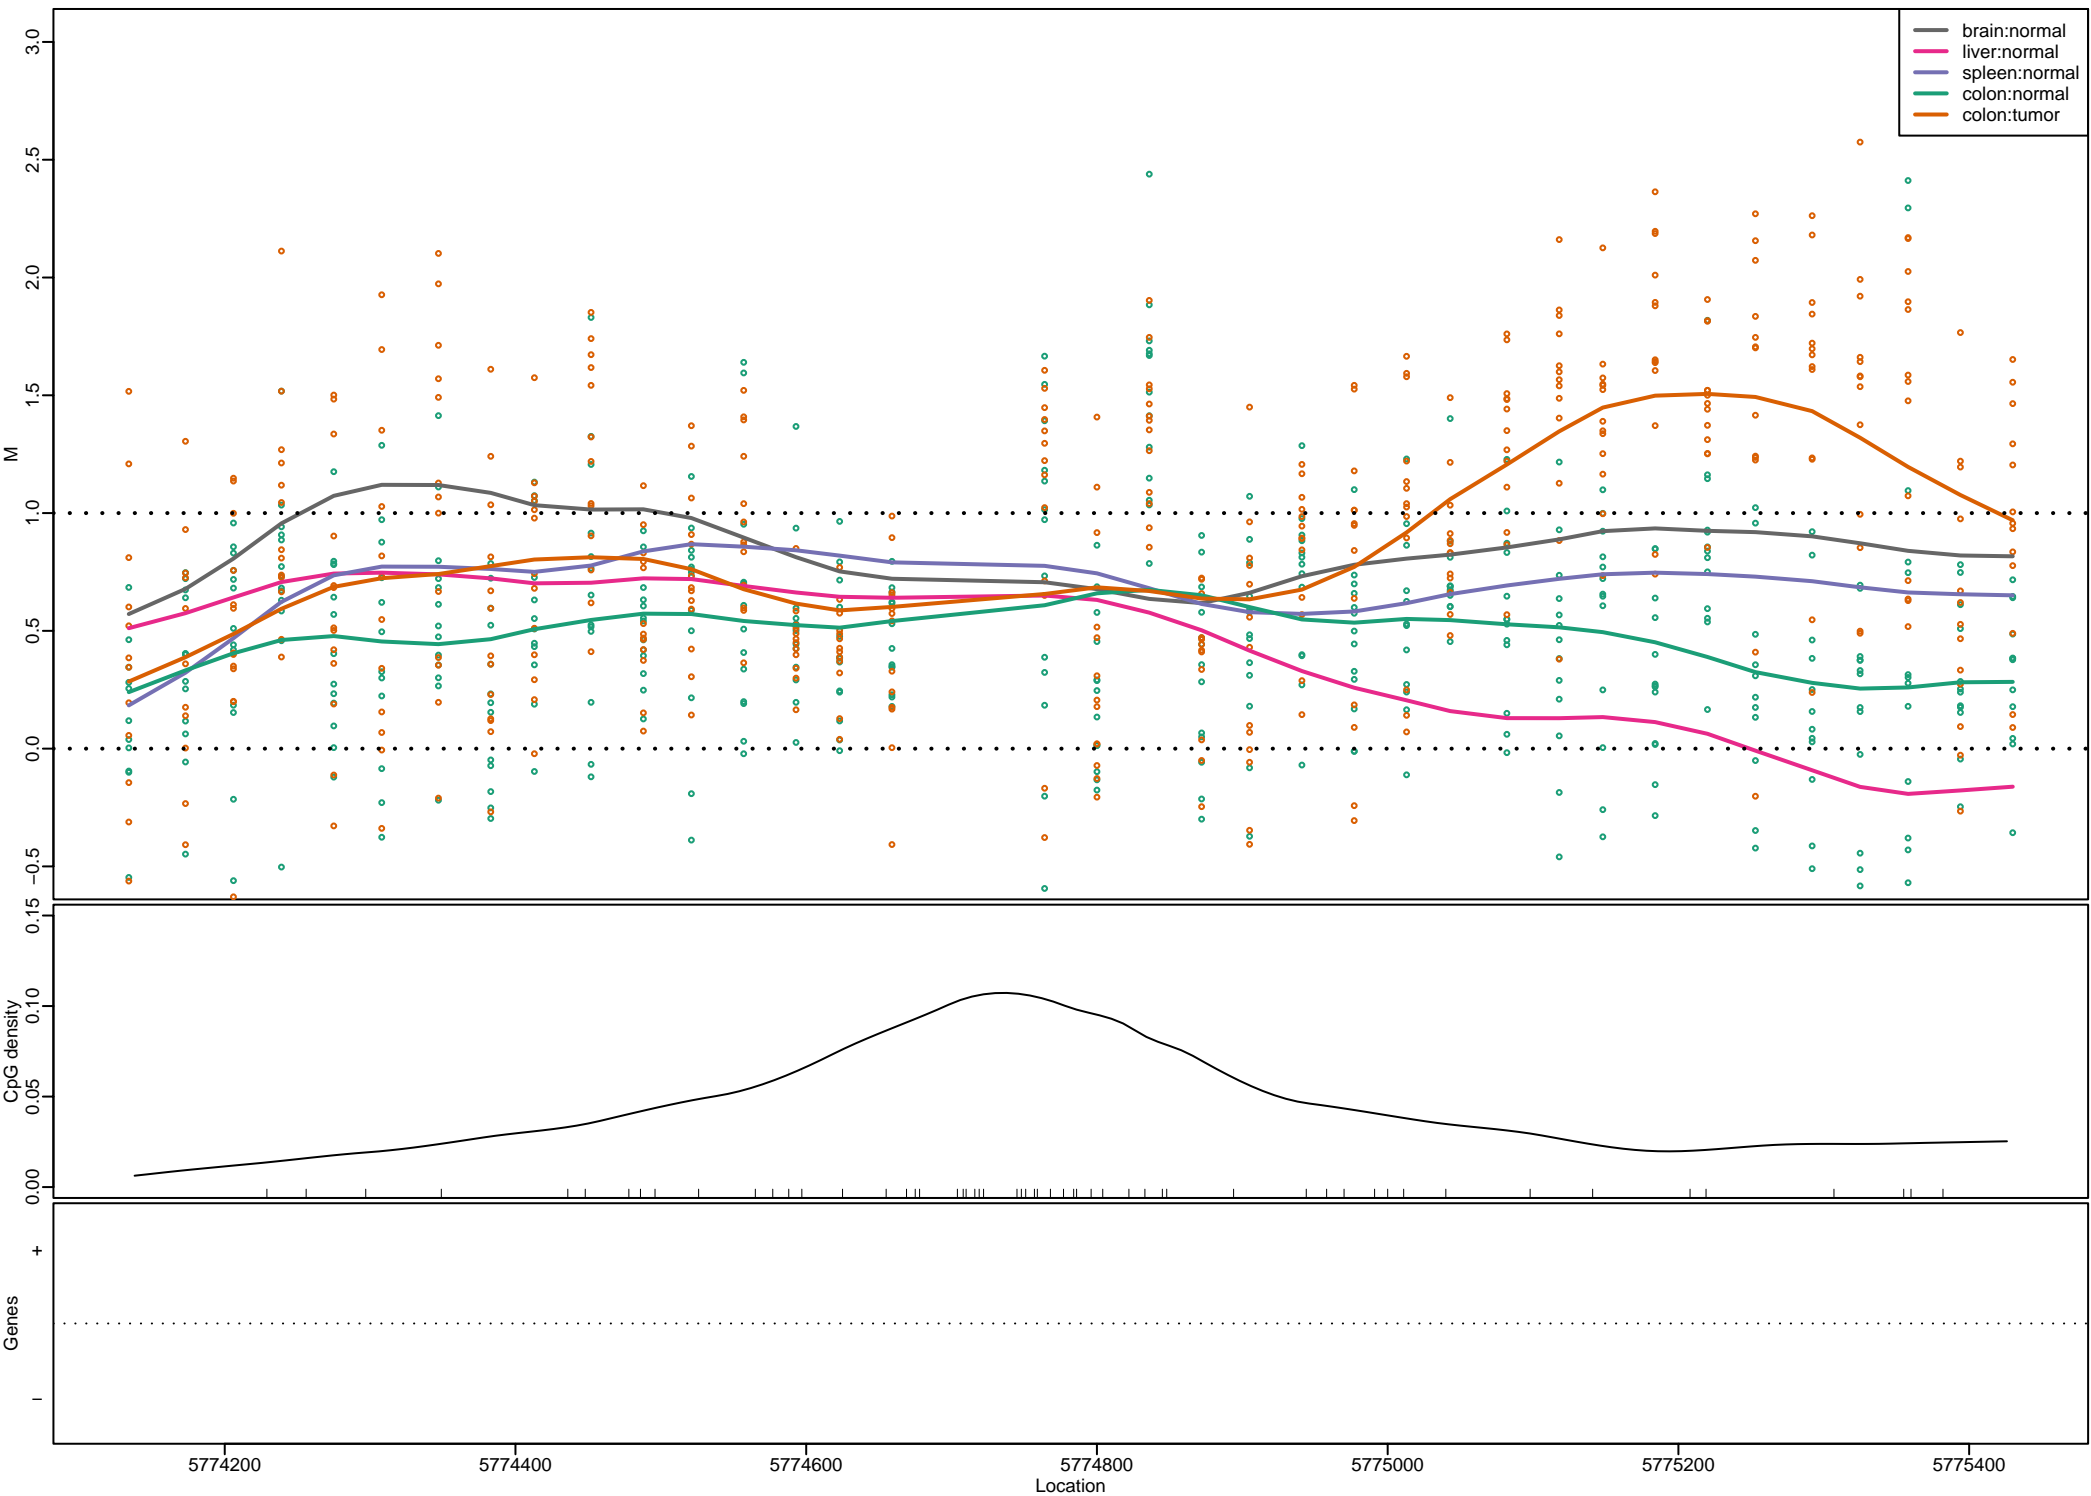

ID:2--chr11:117905330-117910591

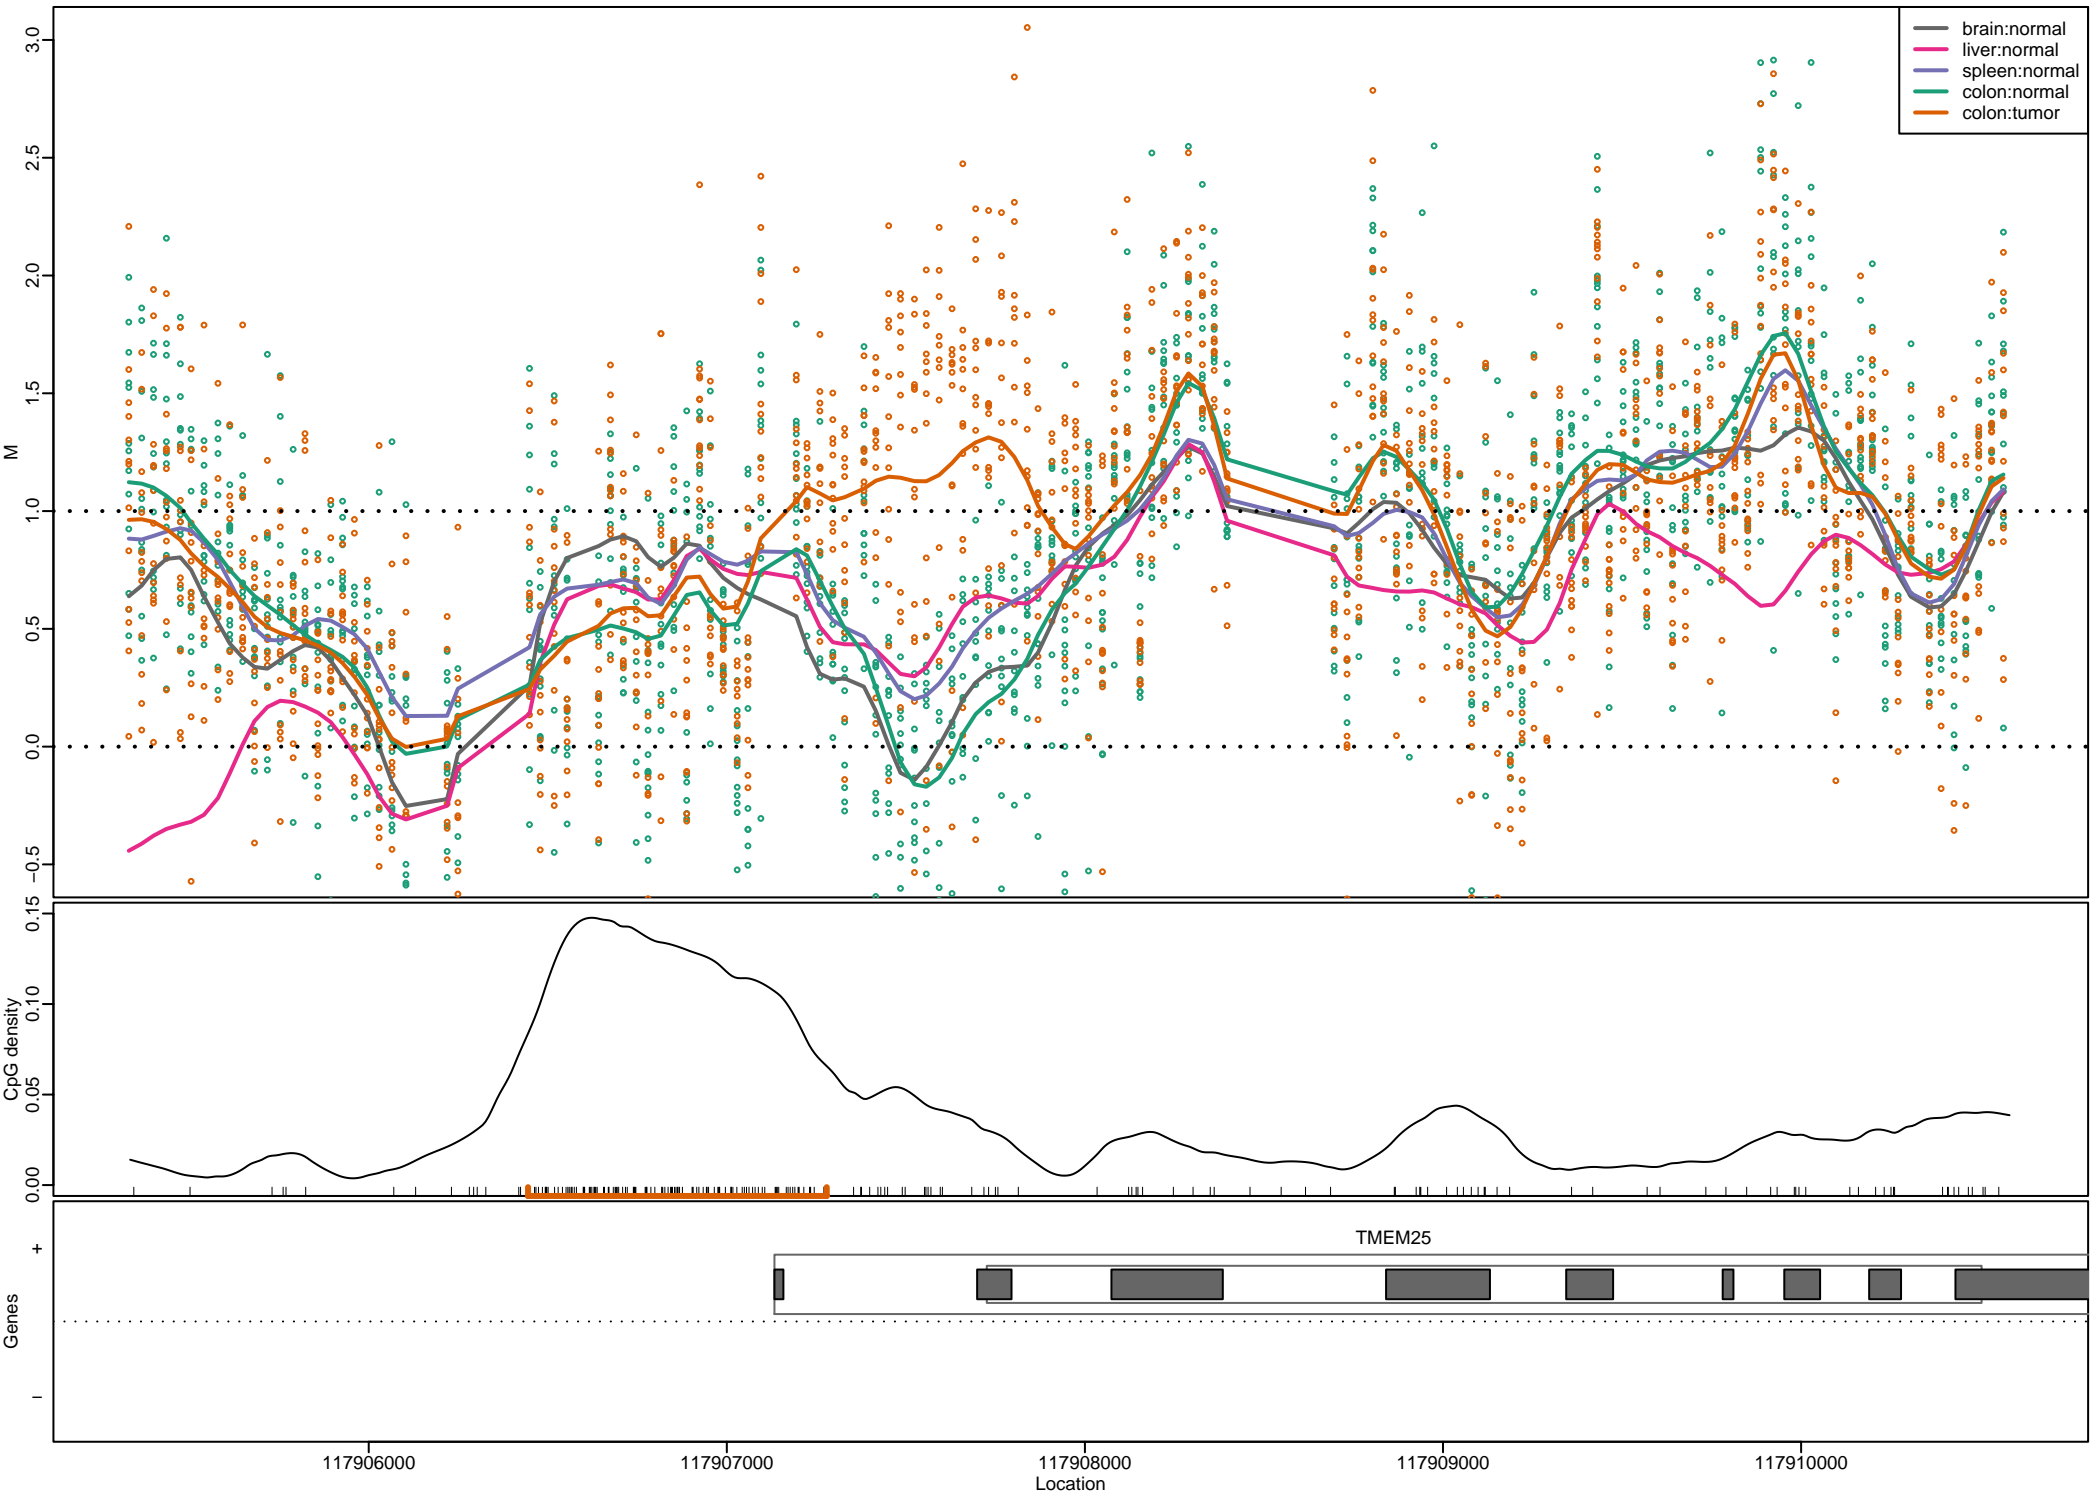

ID:3--chr11:65944867-65949173

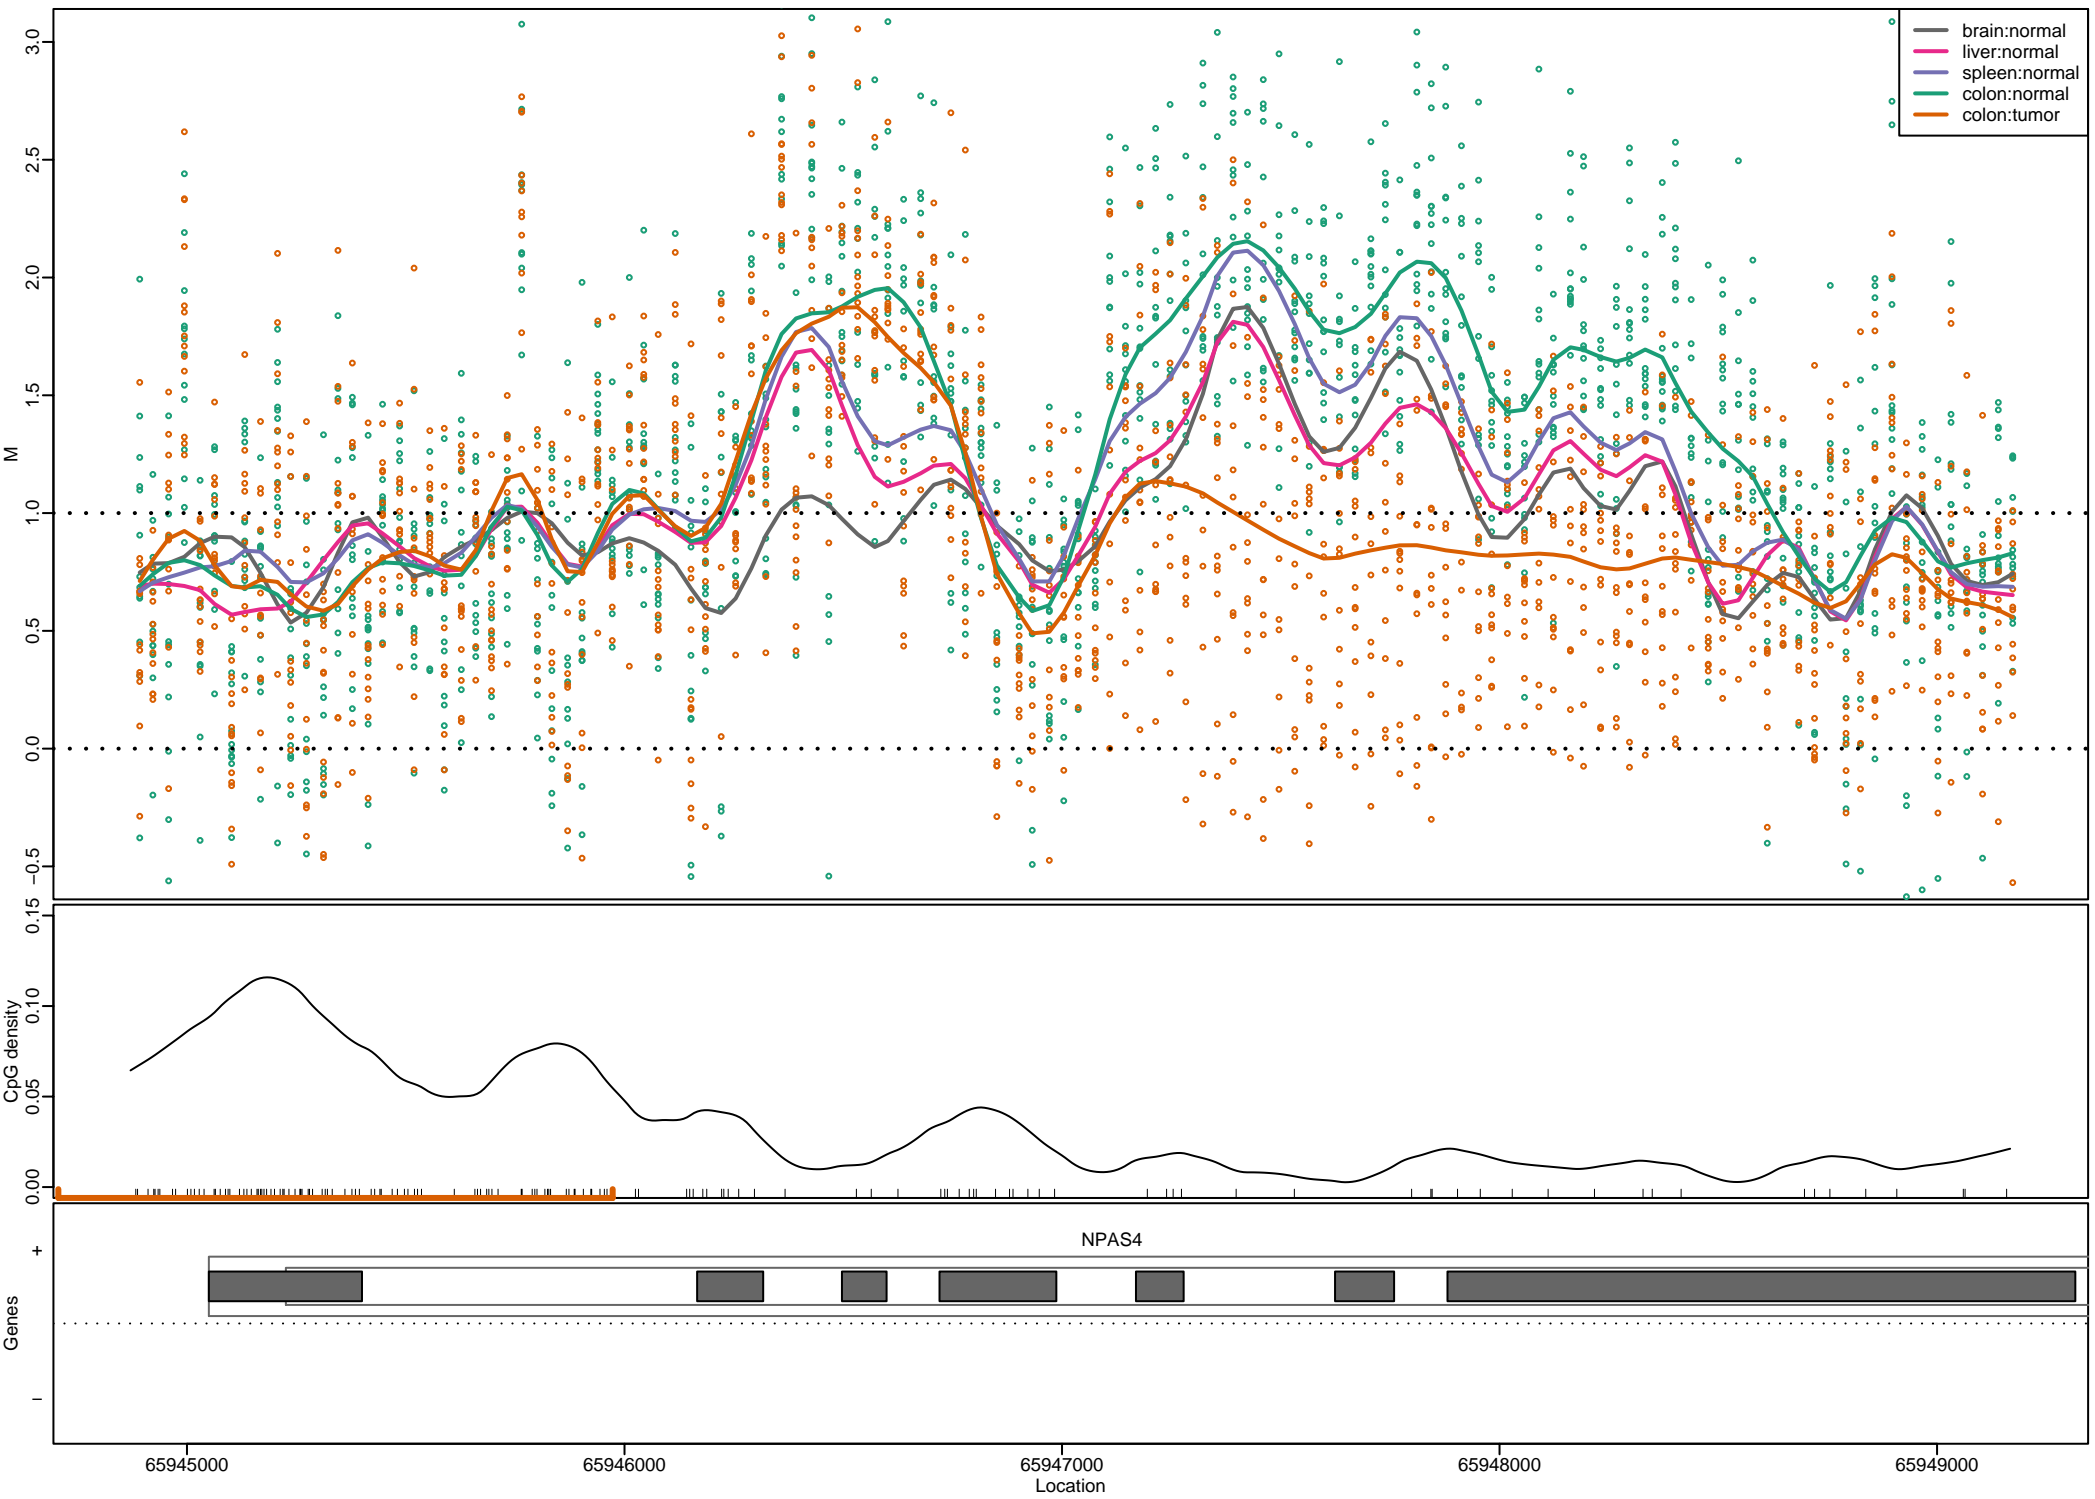

ID:4--chr13:113615559-113618917

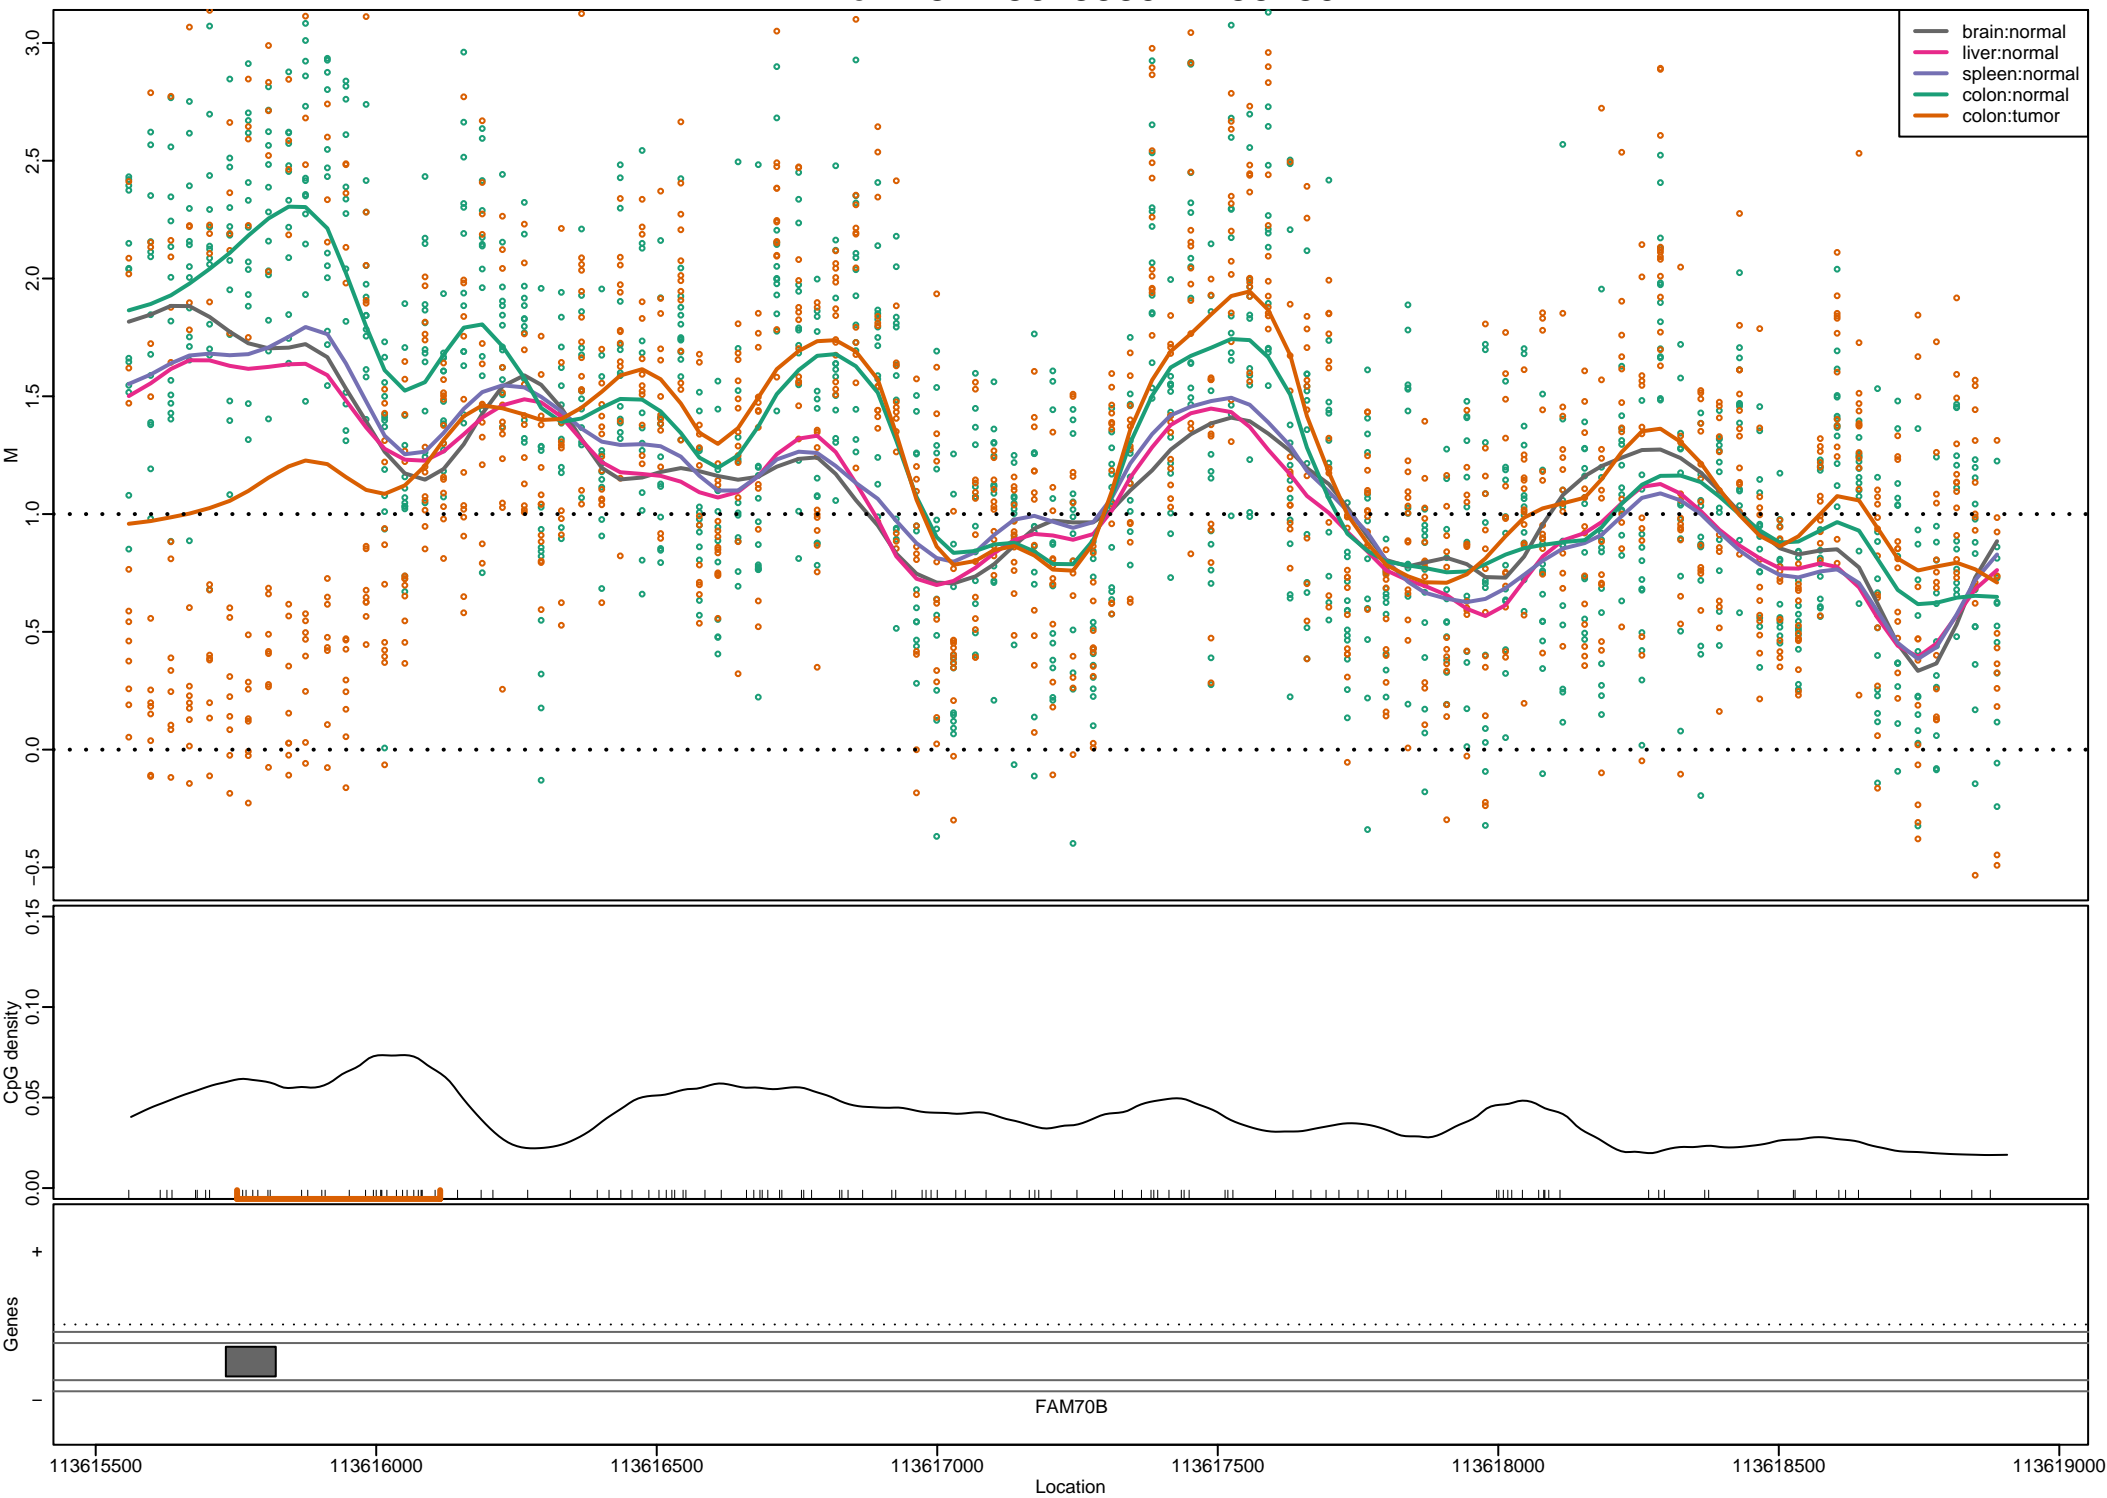

ID:5--chr15:58474576-58478483

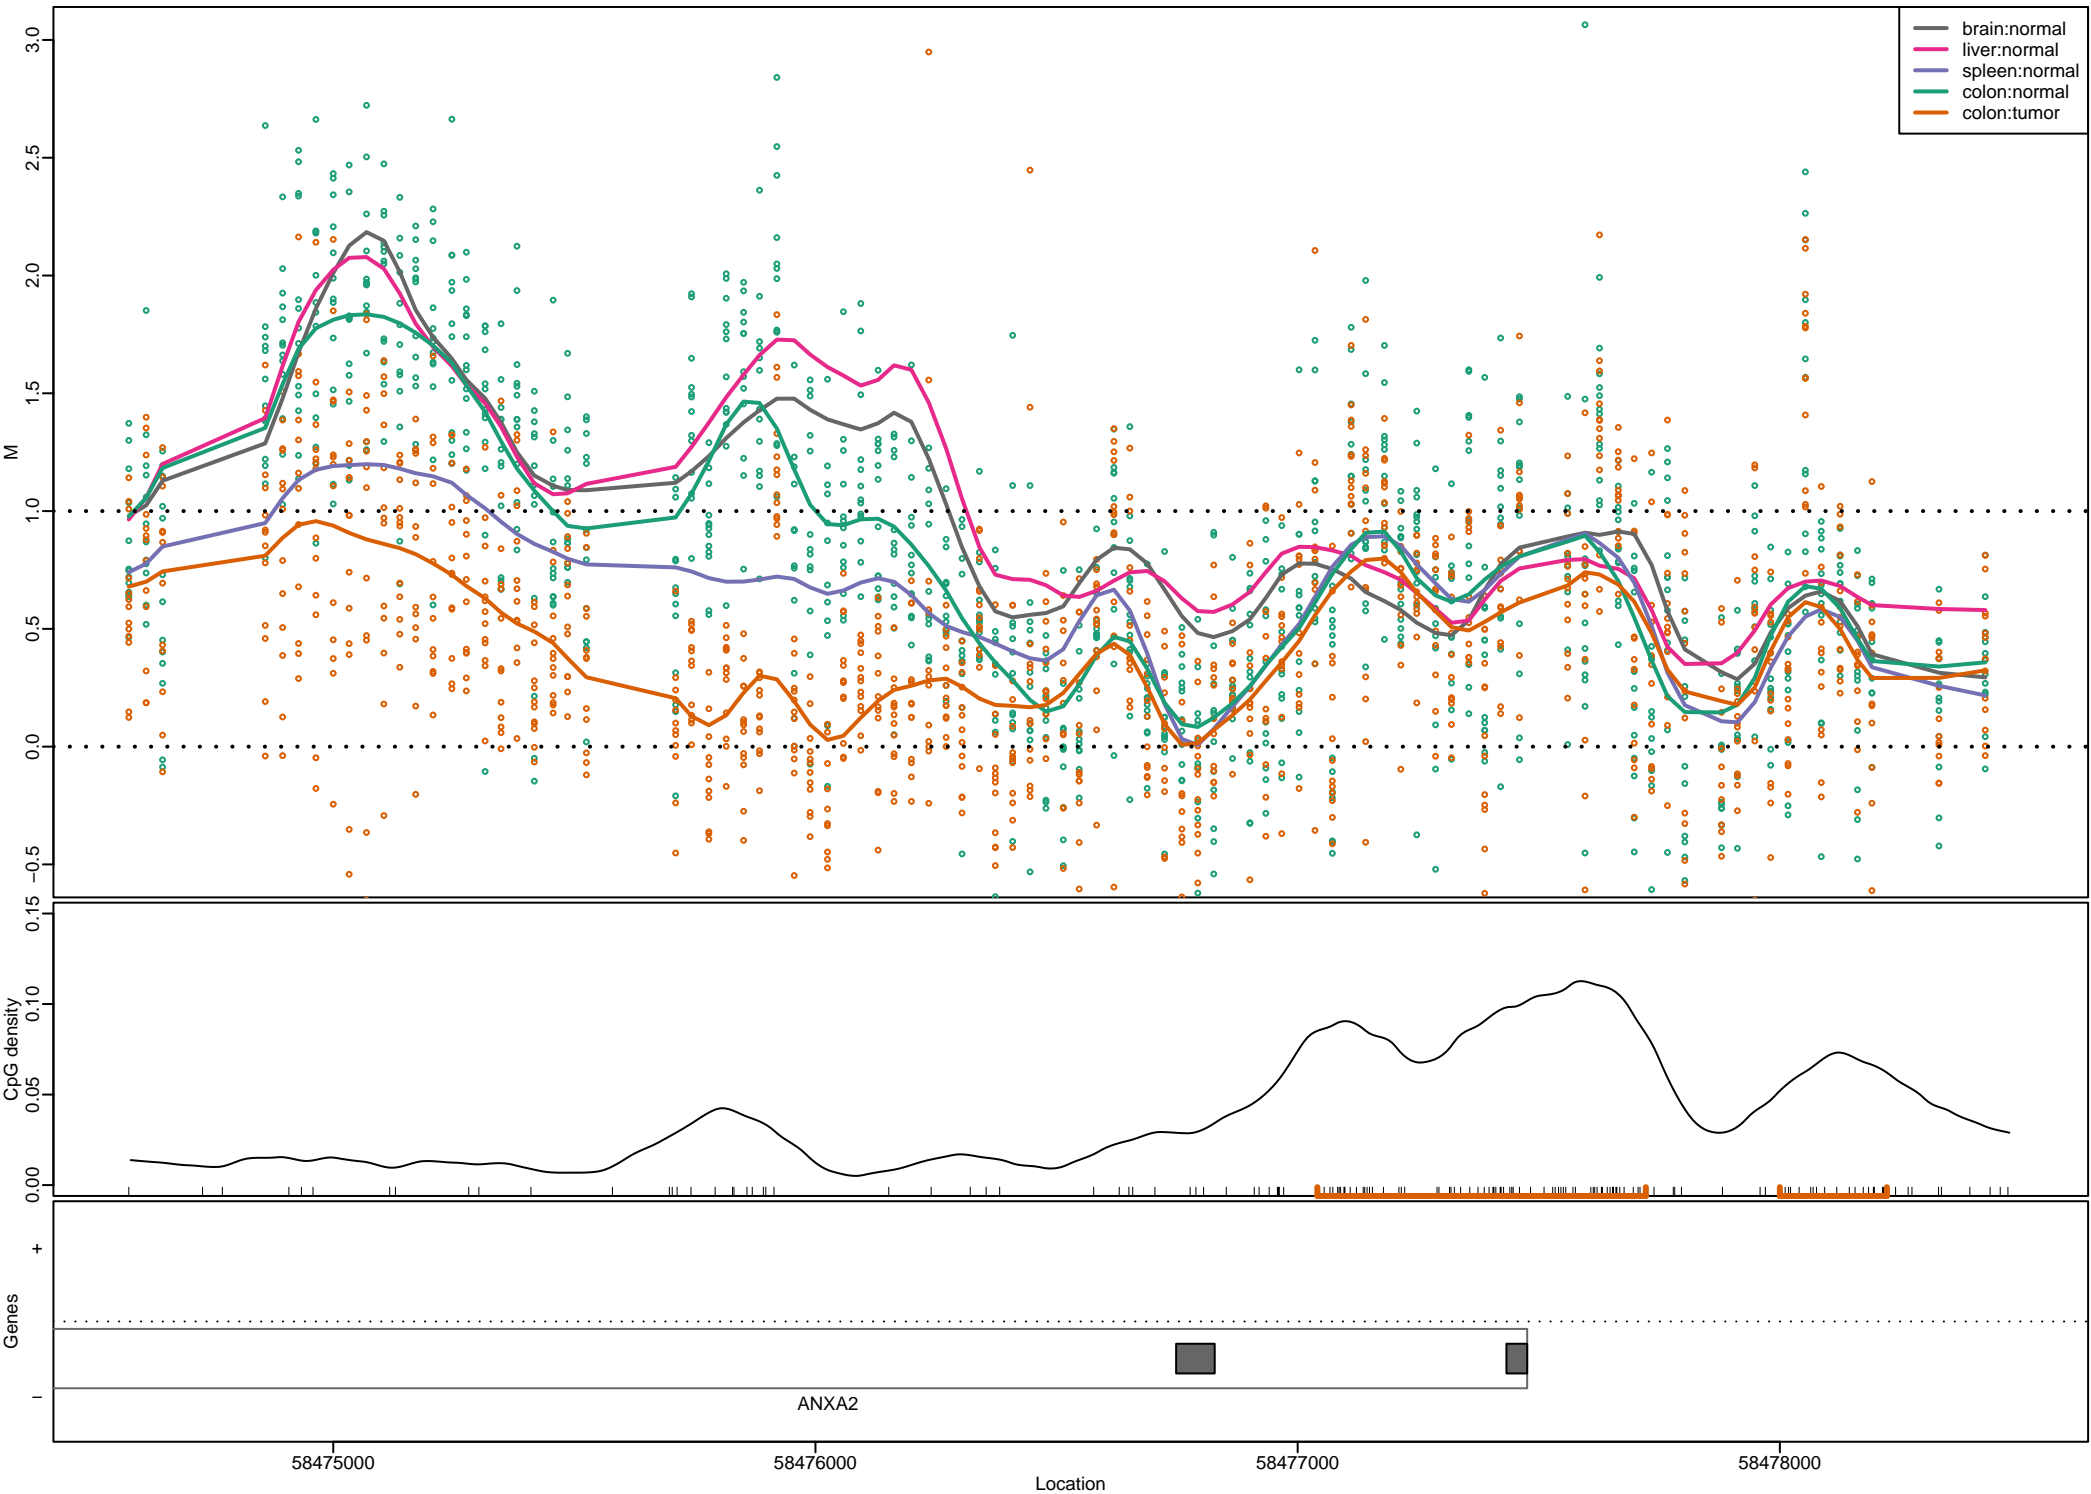

ID:6--chr19:5156734-5160045

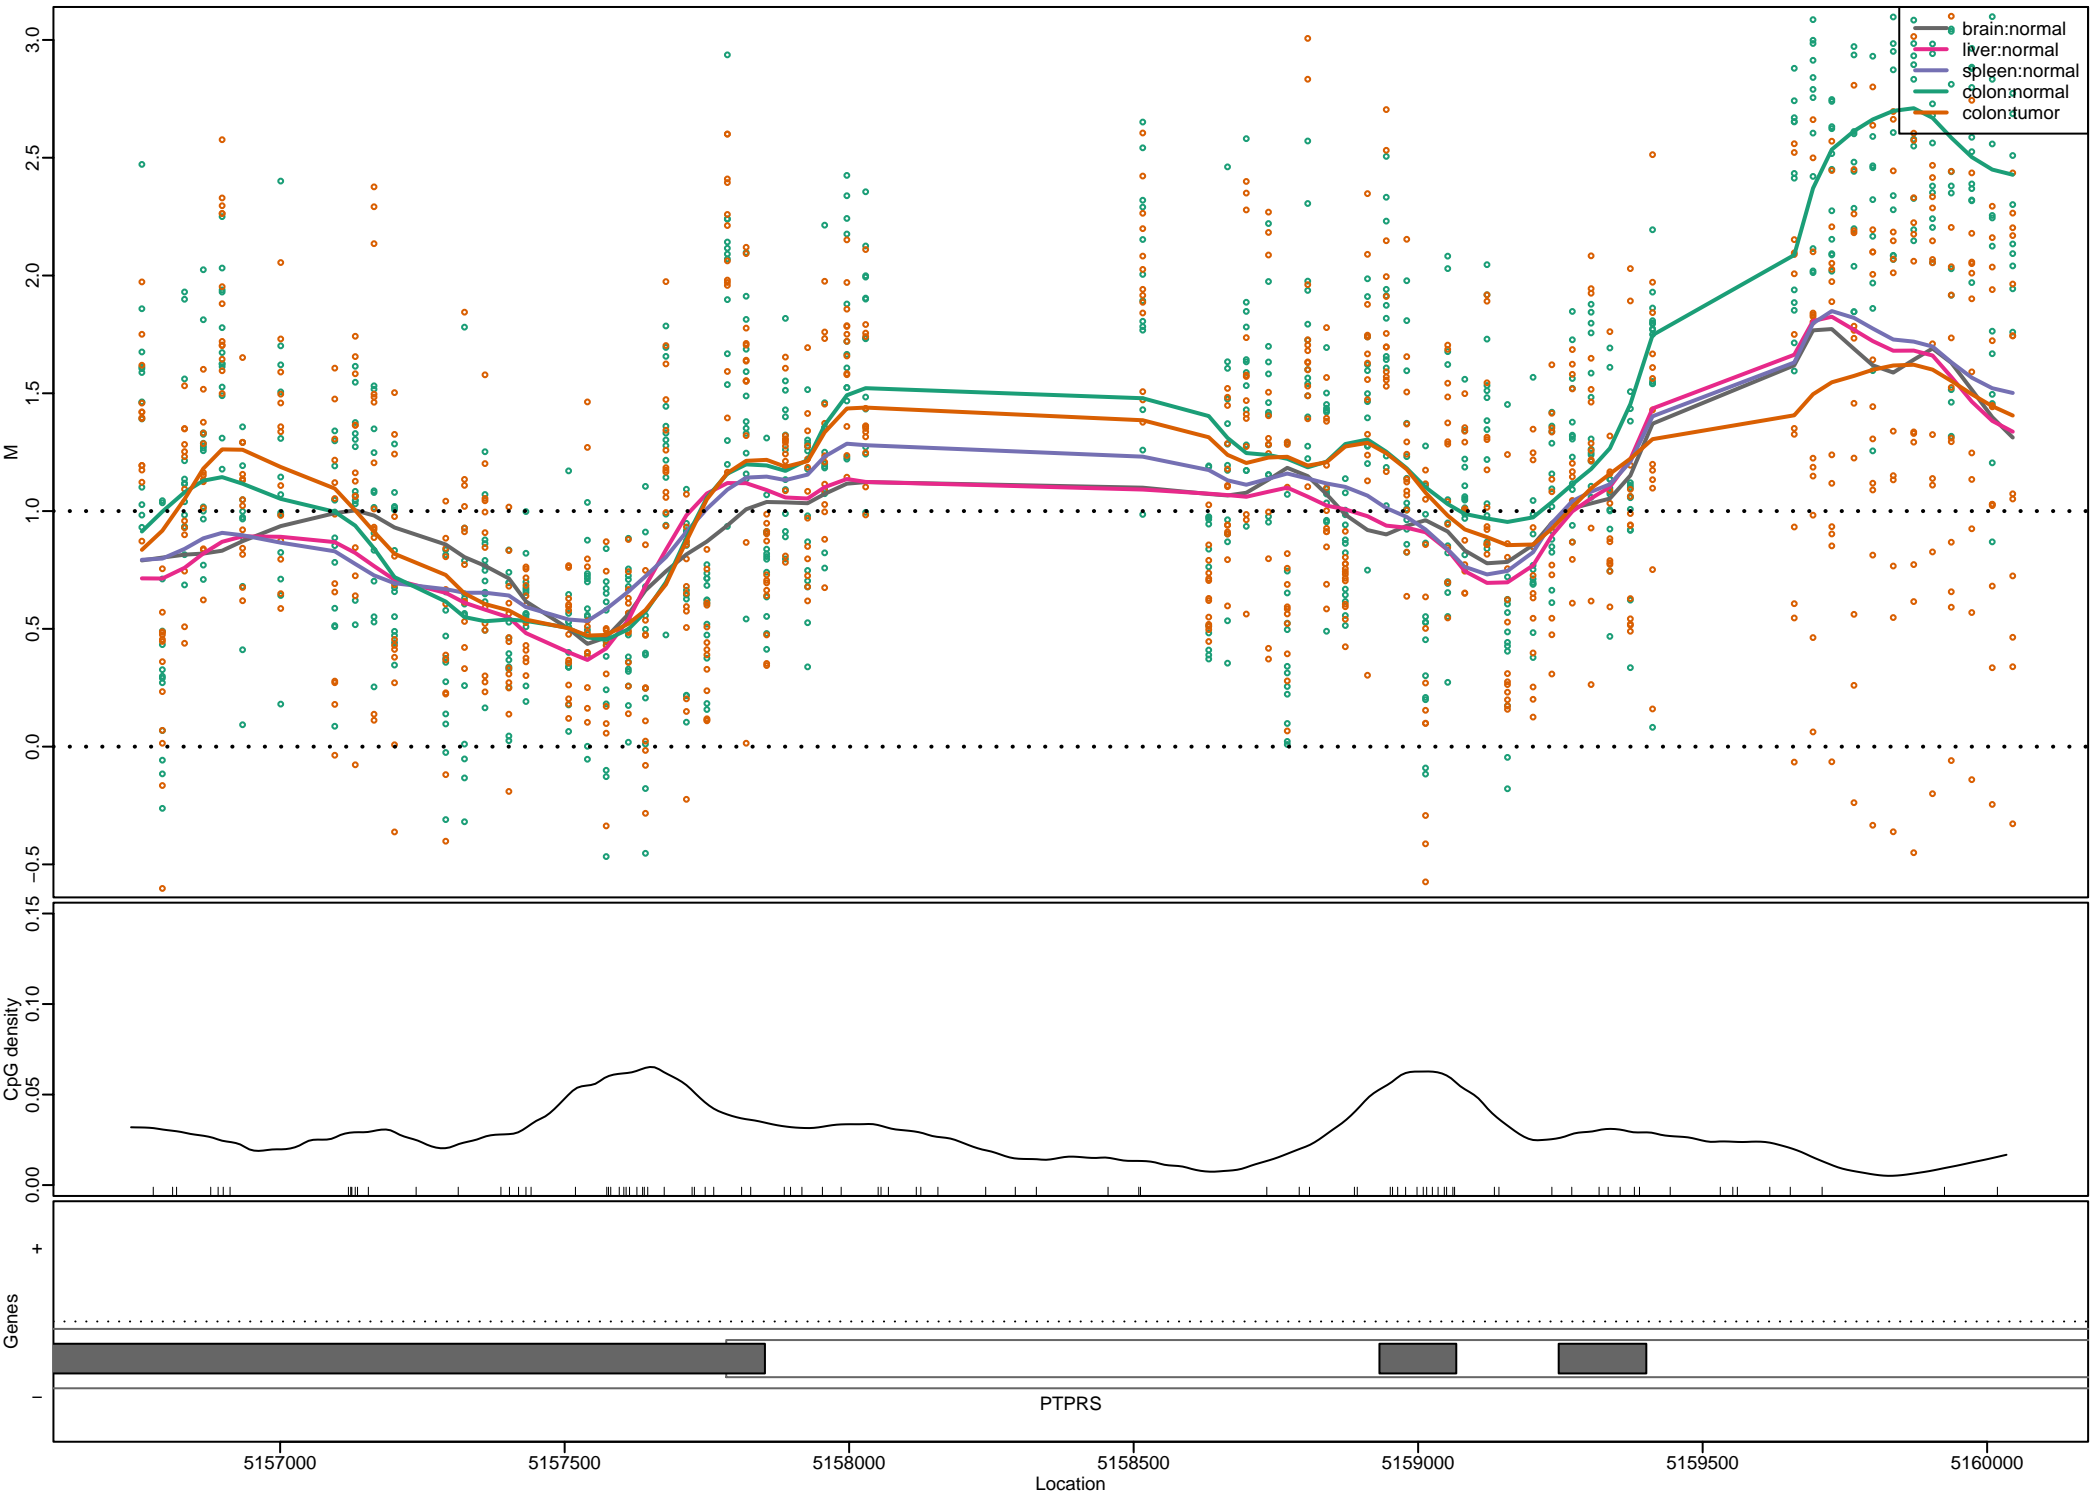

ID:7--chr19:5294447-5297730

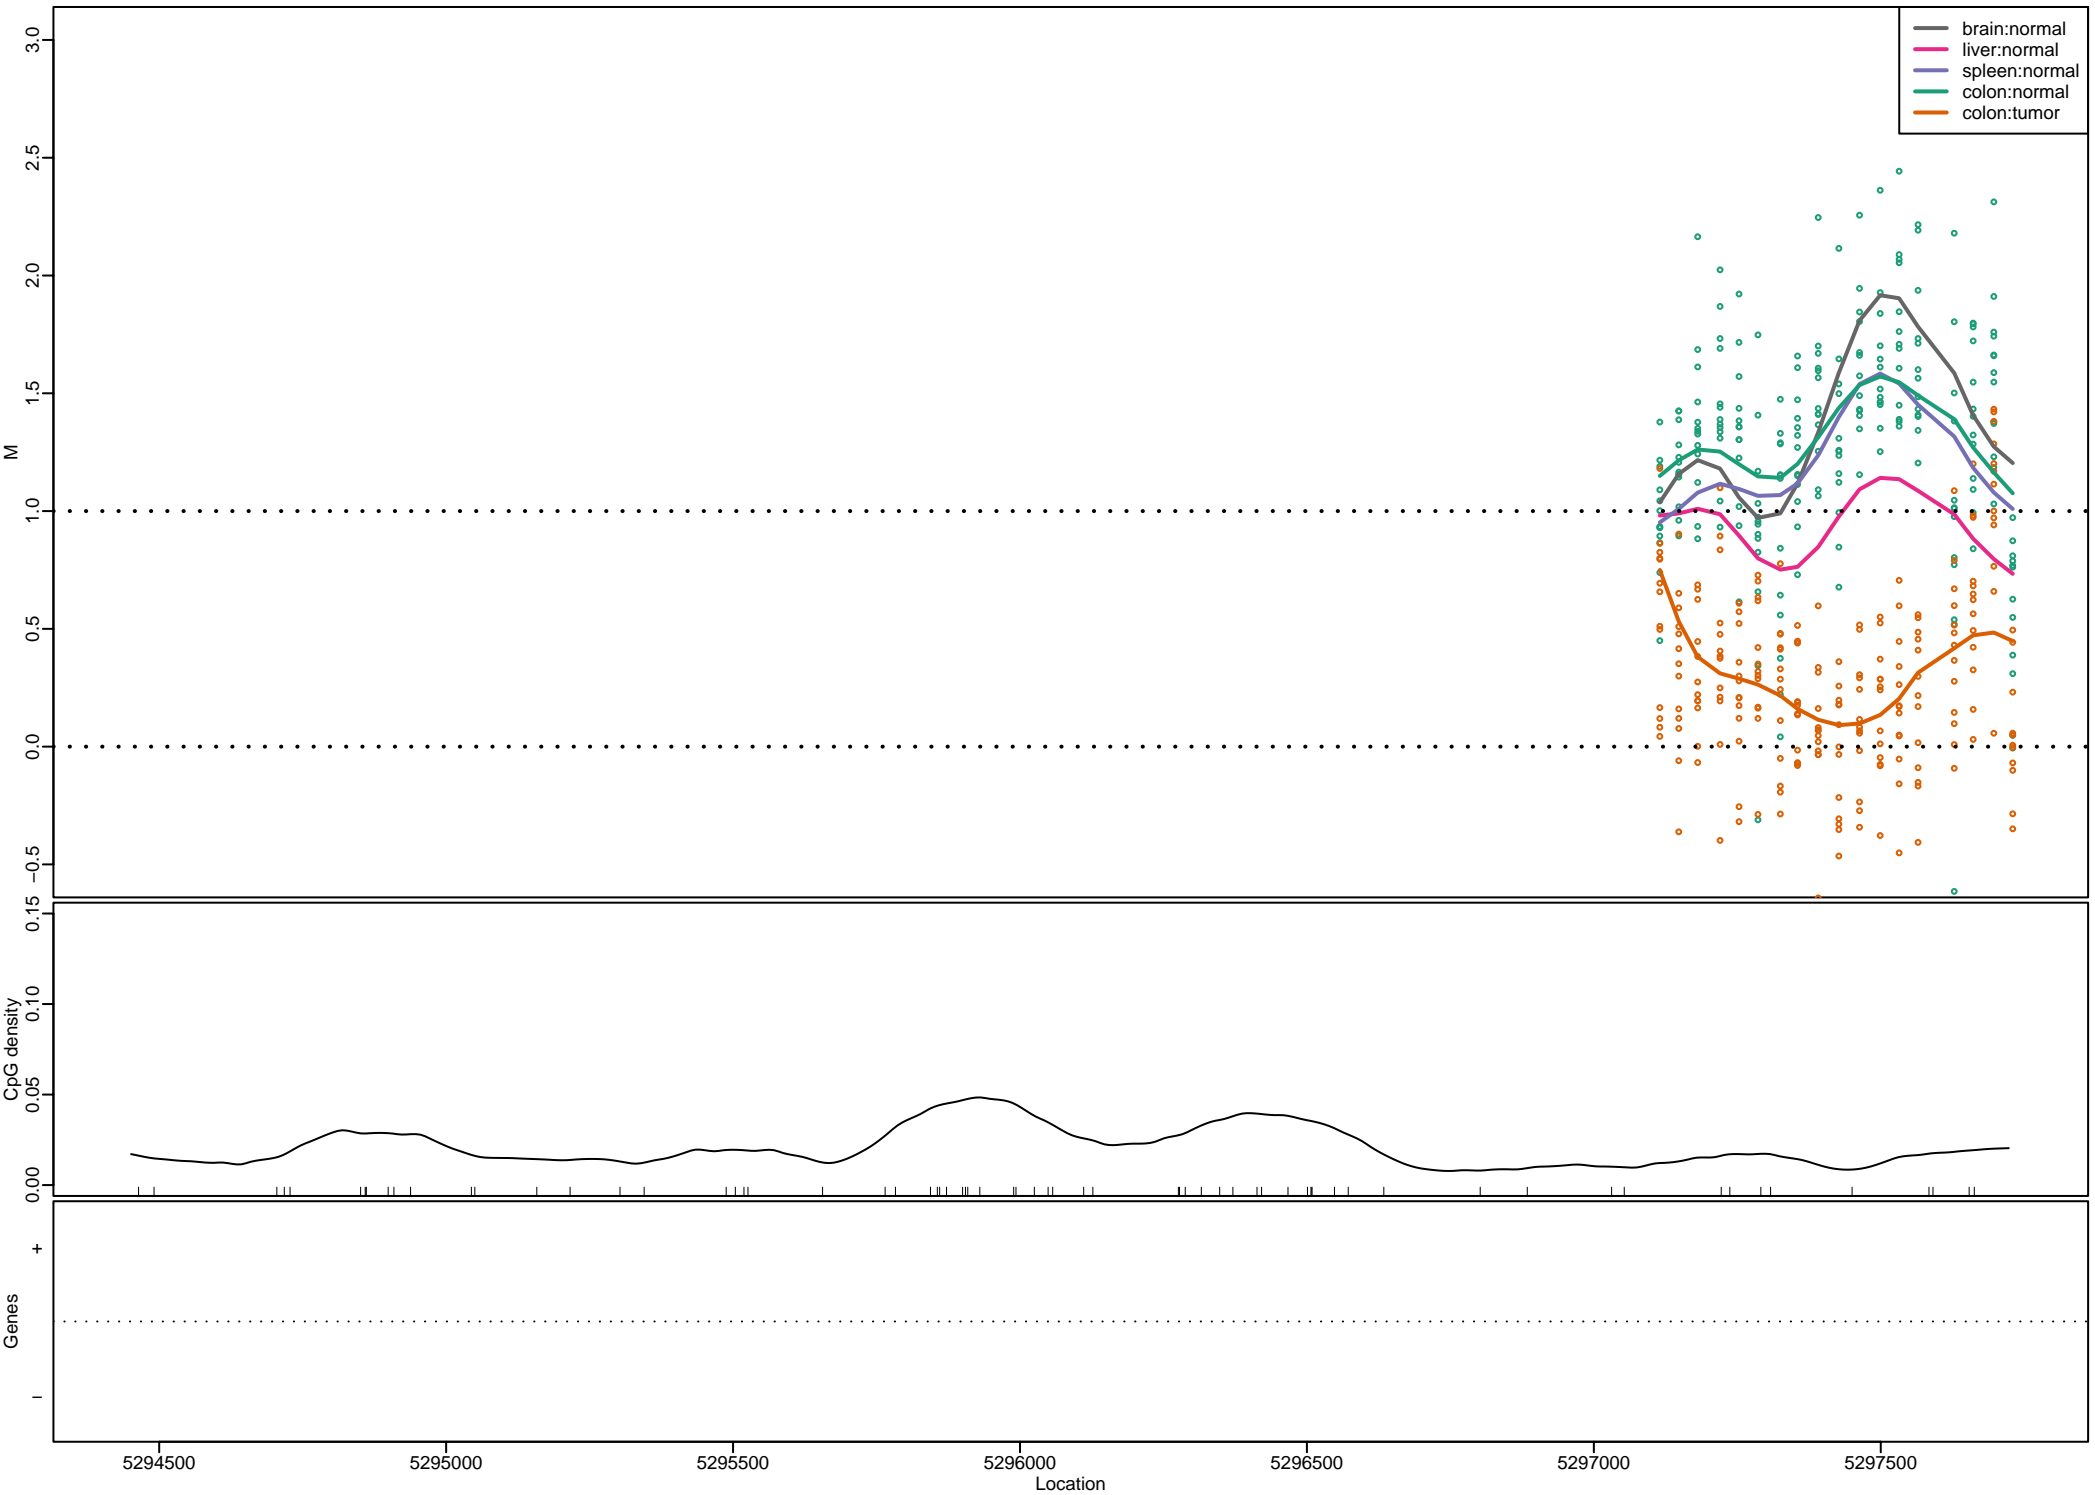



ID:8--chr19:55628848-55632122

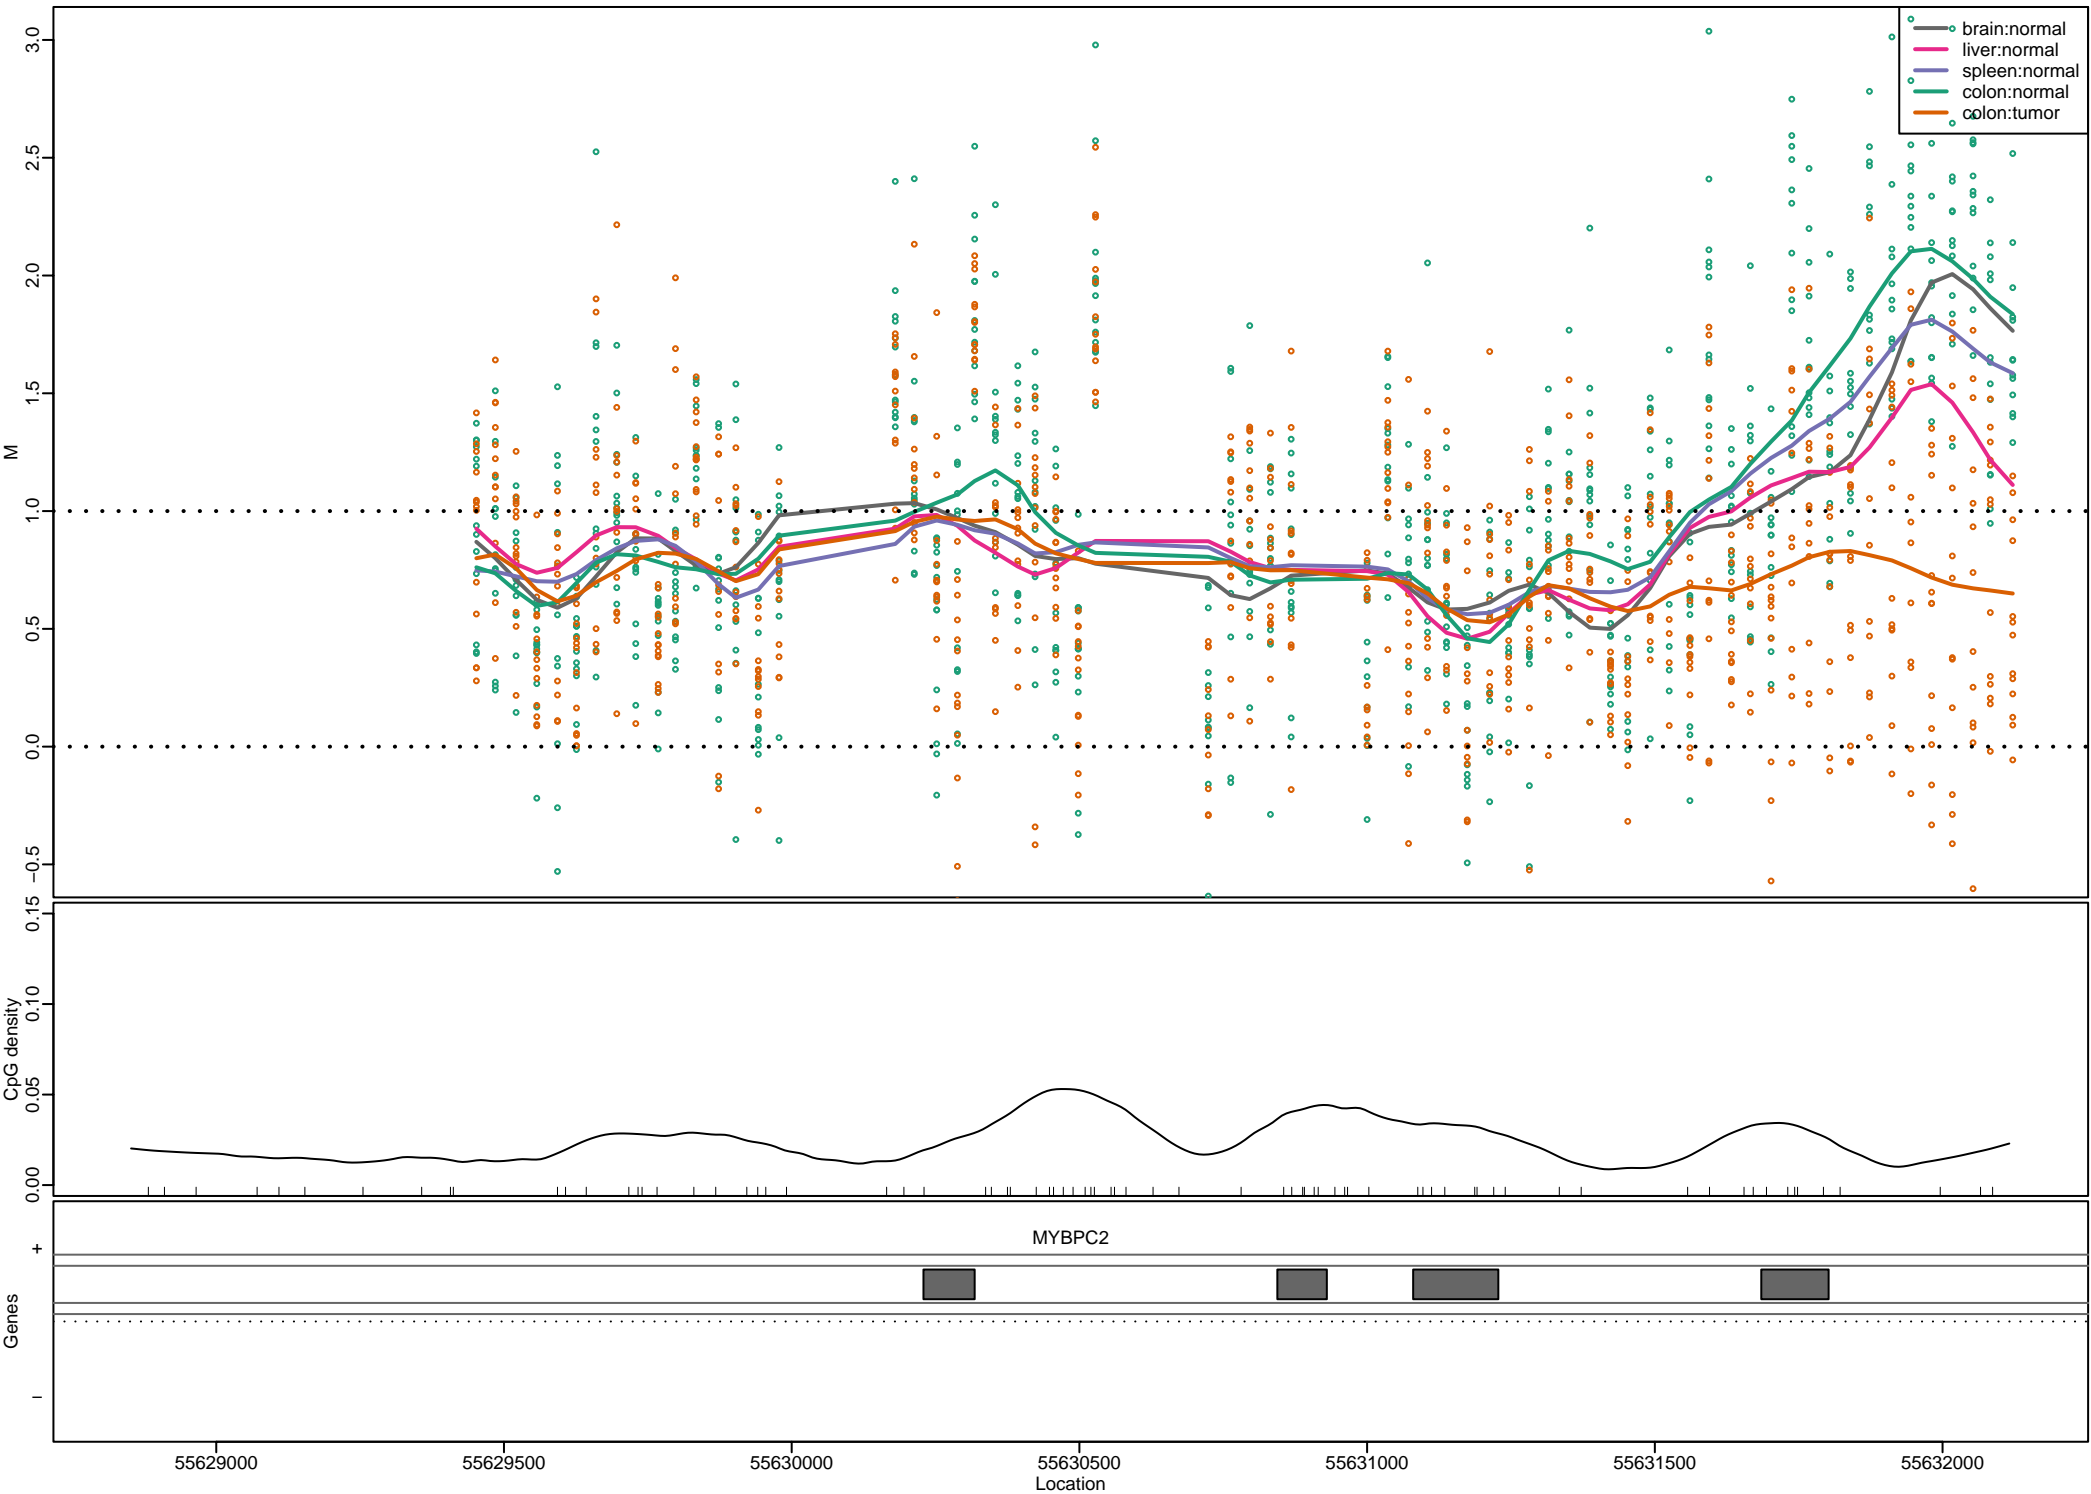

ID:9--chr19:60702435-60705988

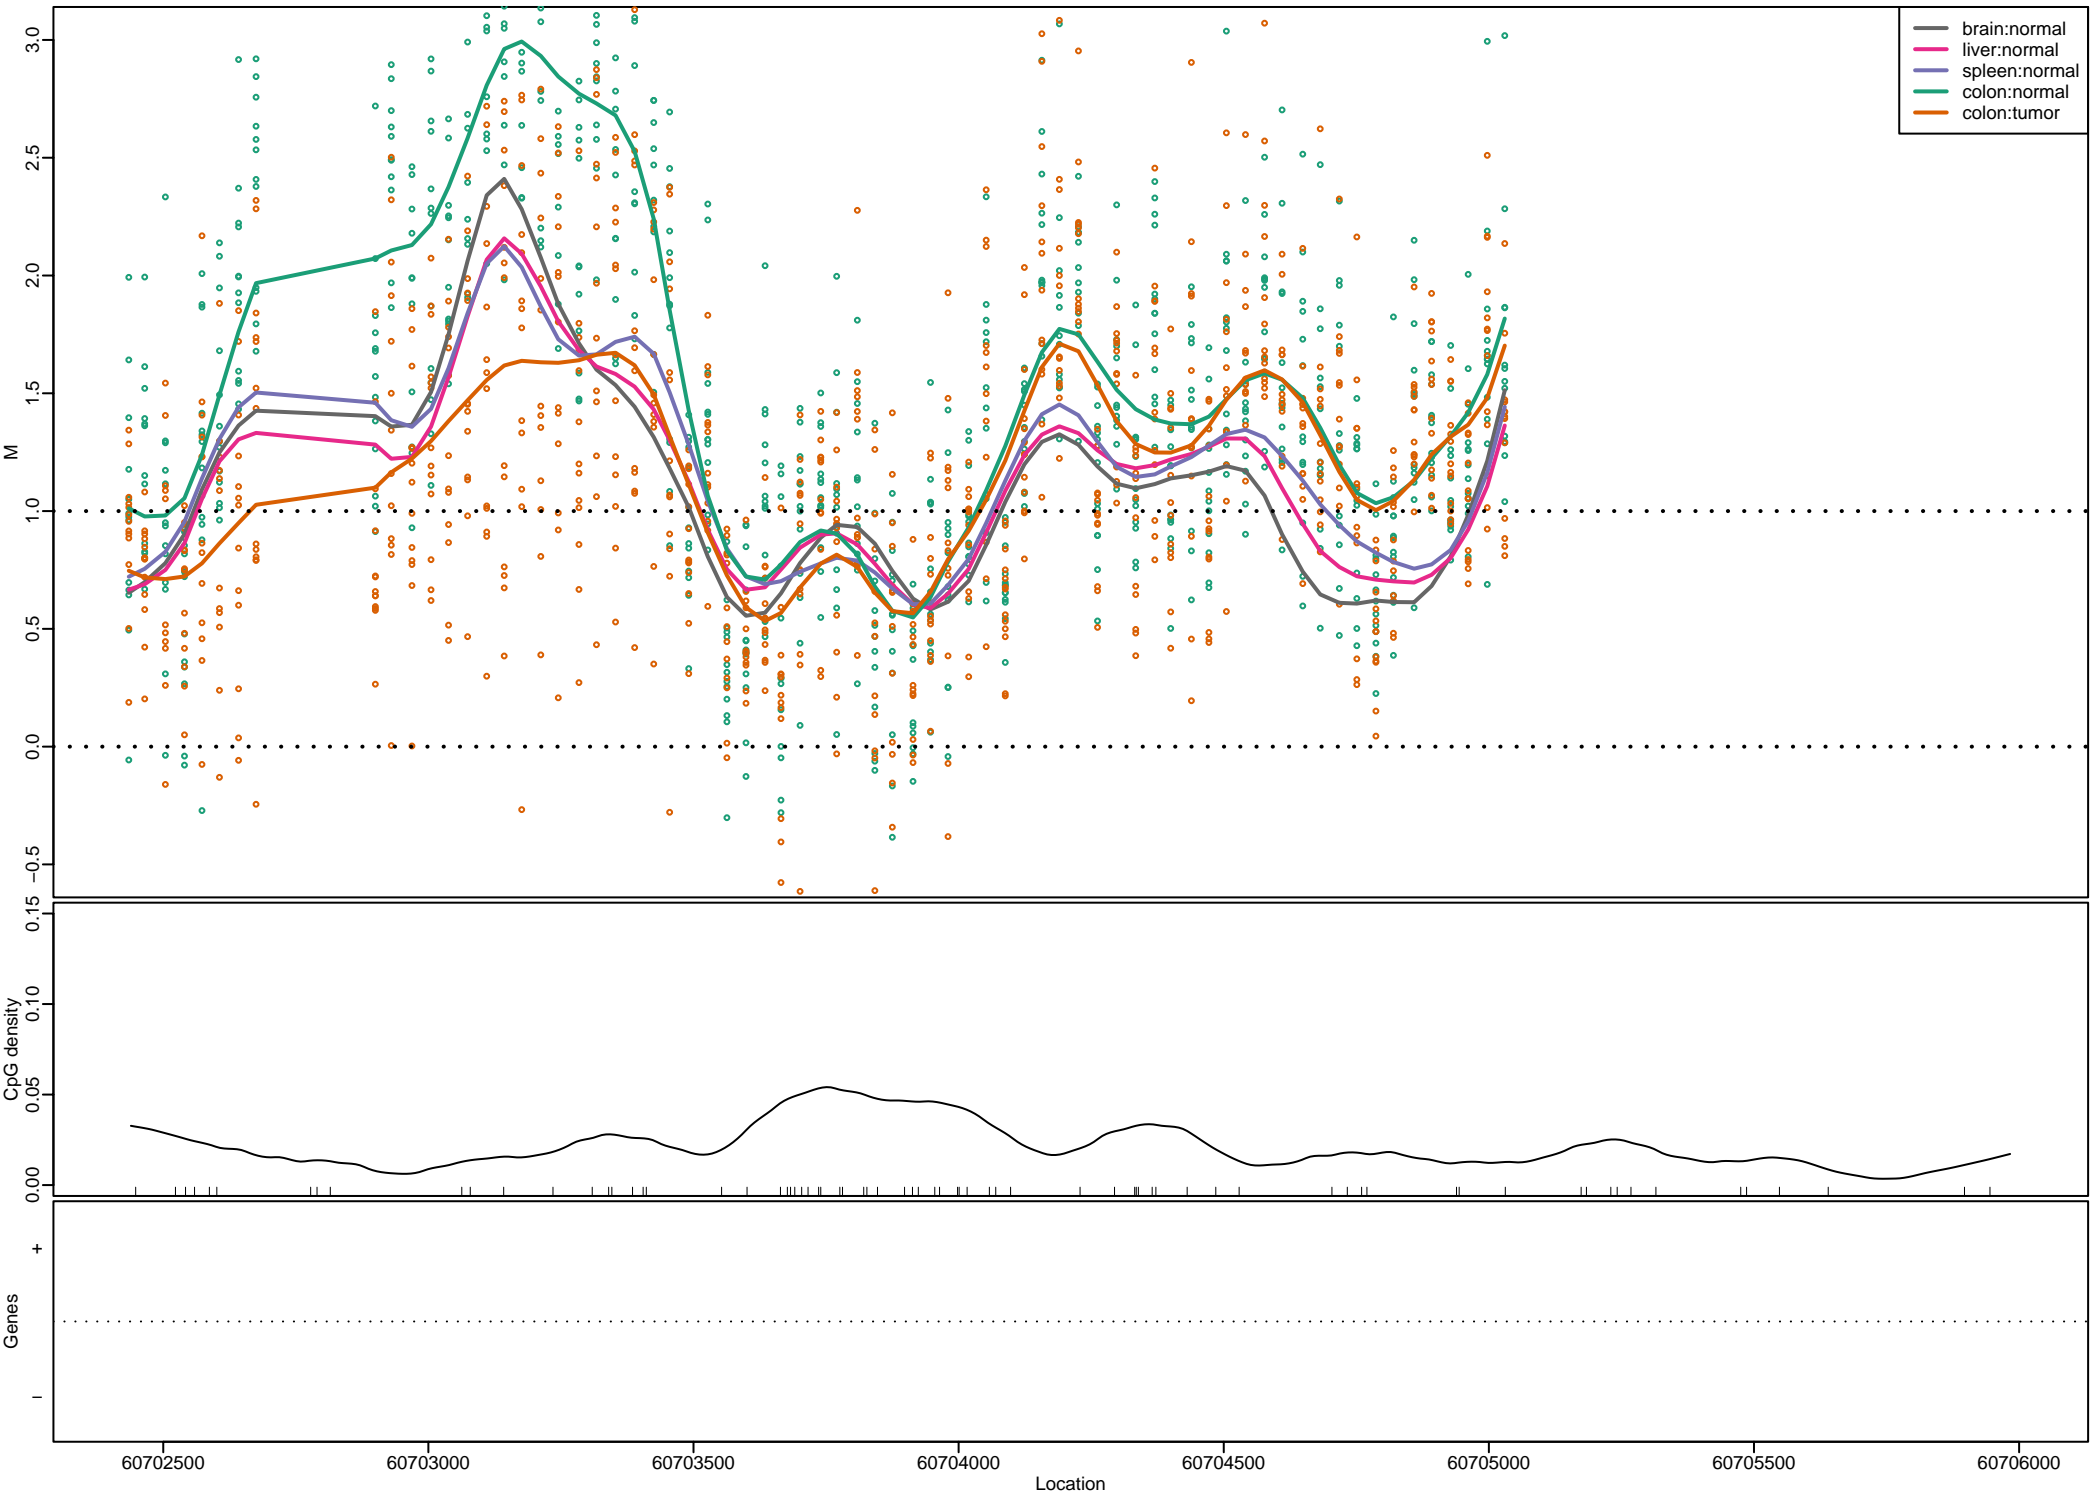

ID:10--chr20:33650044-33653244

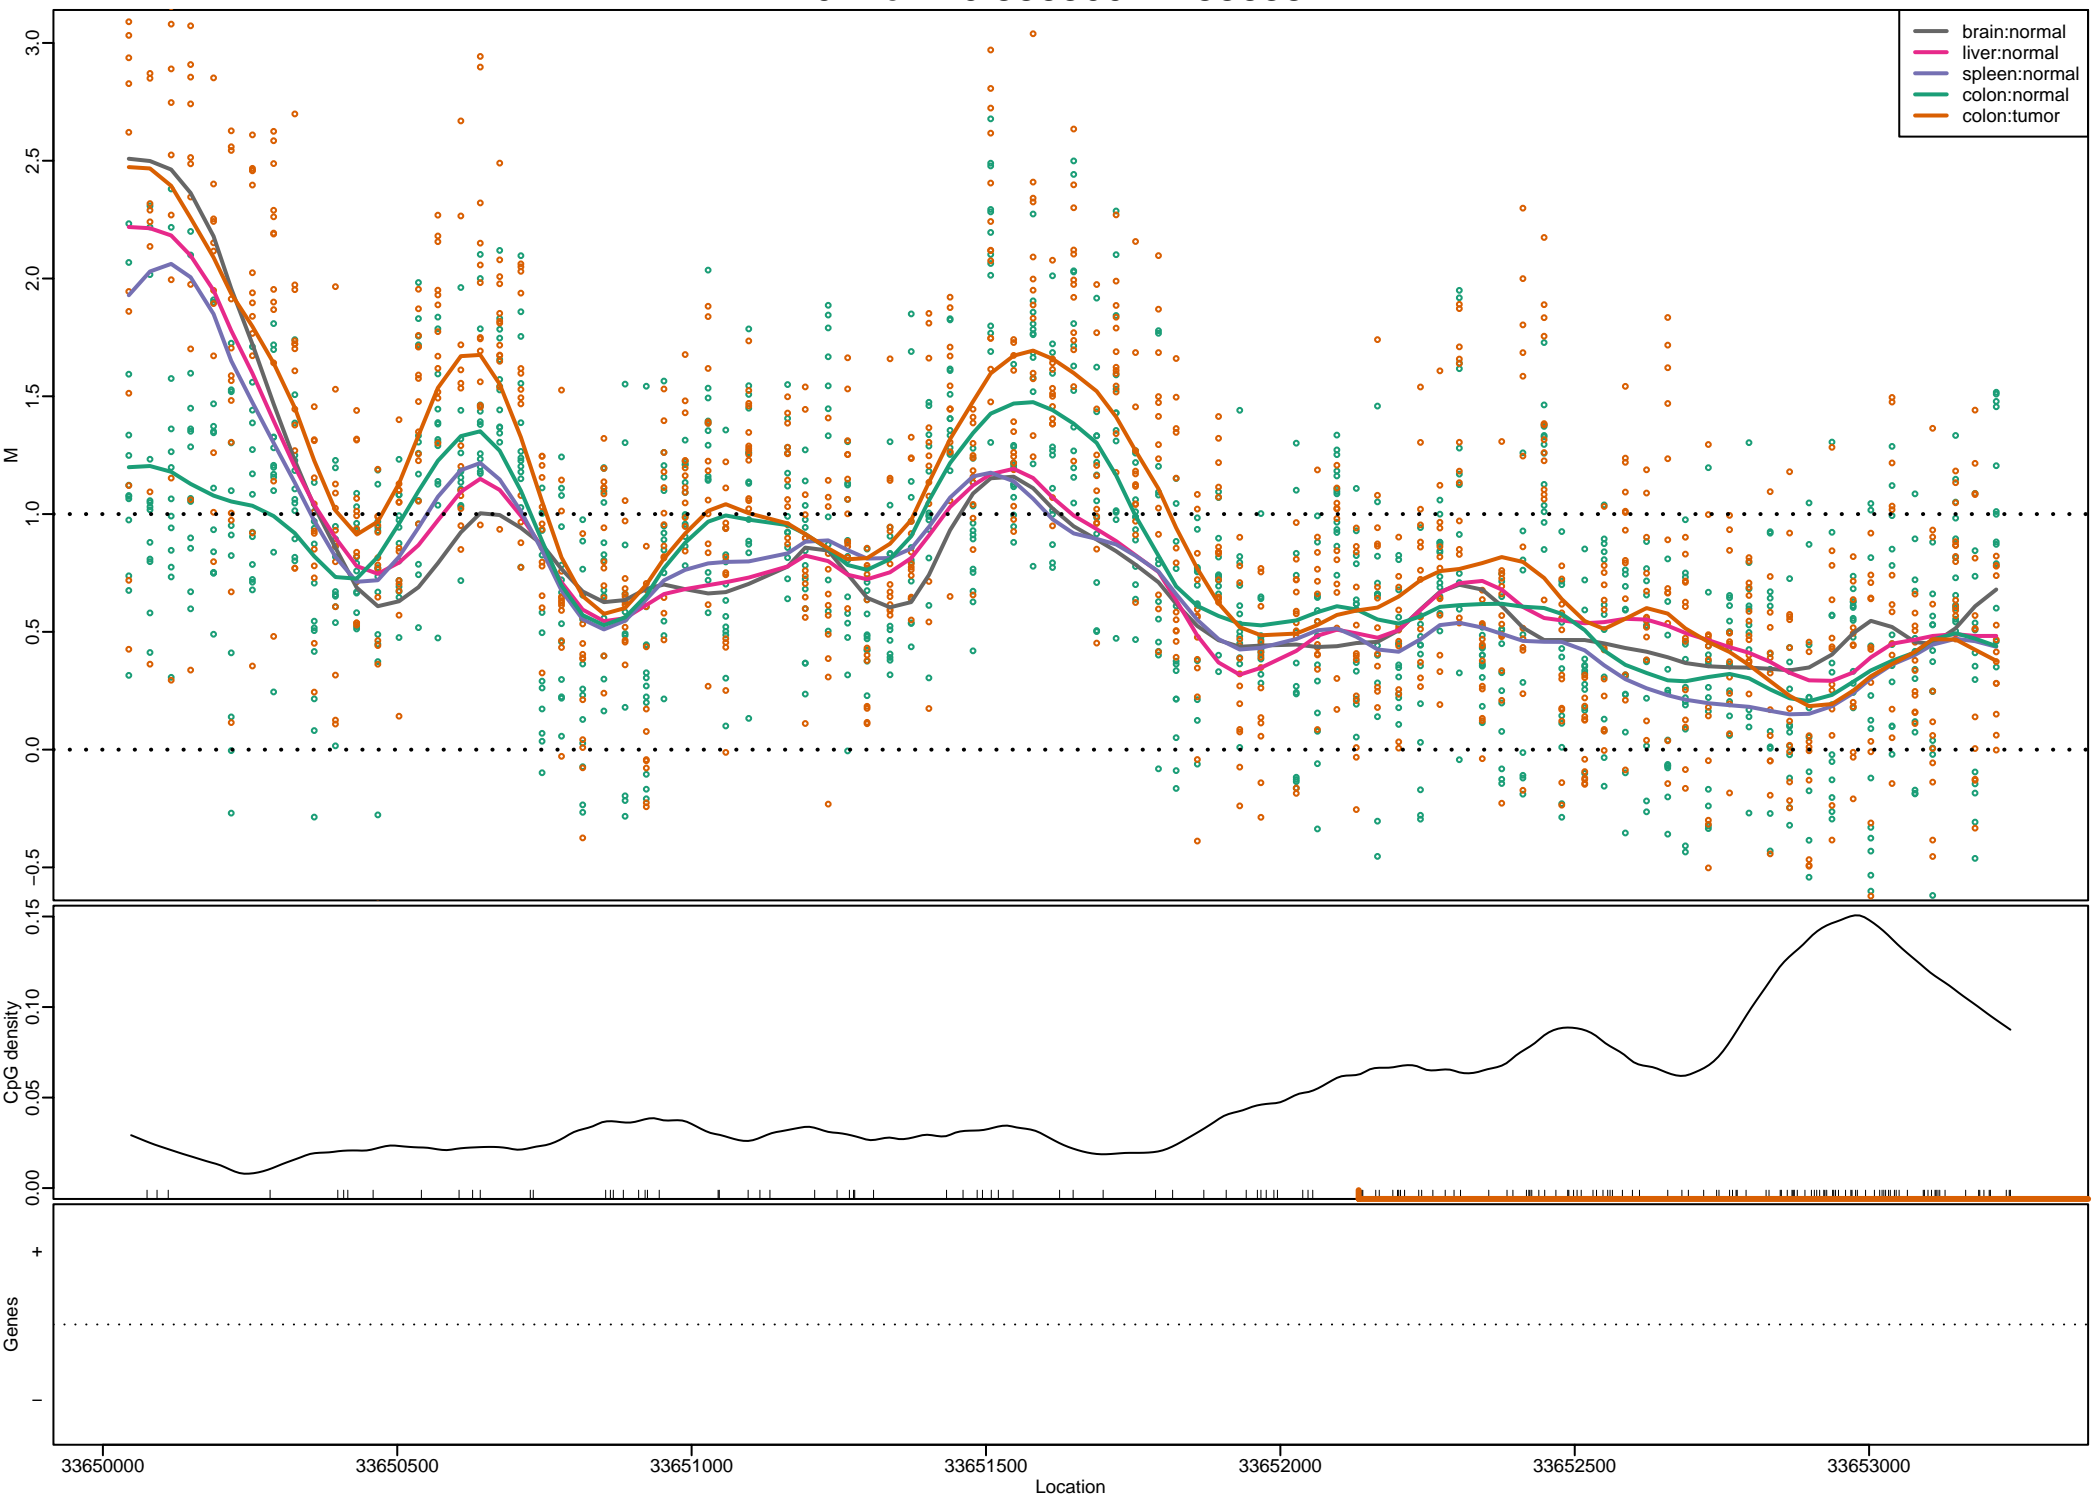

ID:11--chr21:37856186-37859505

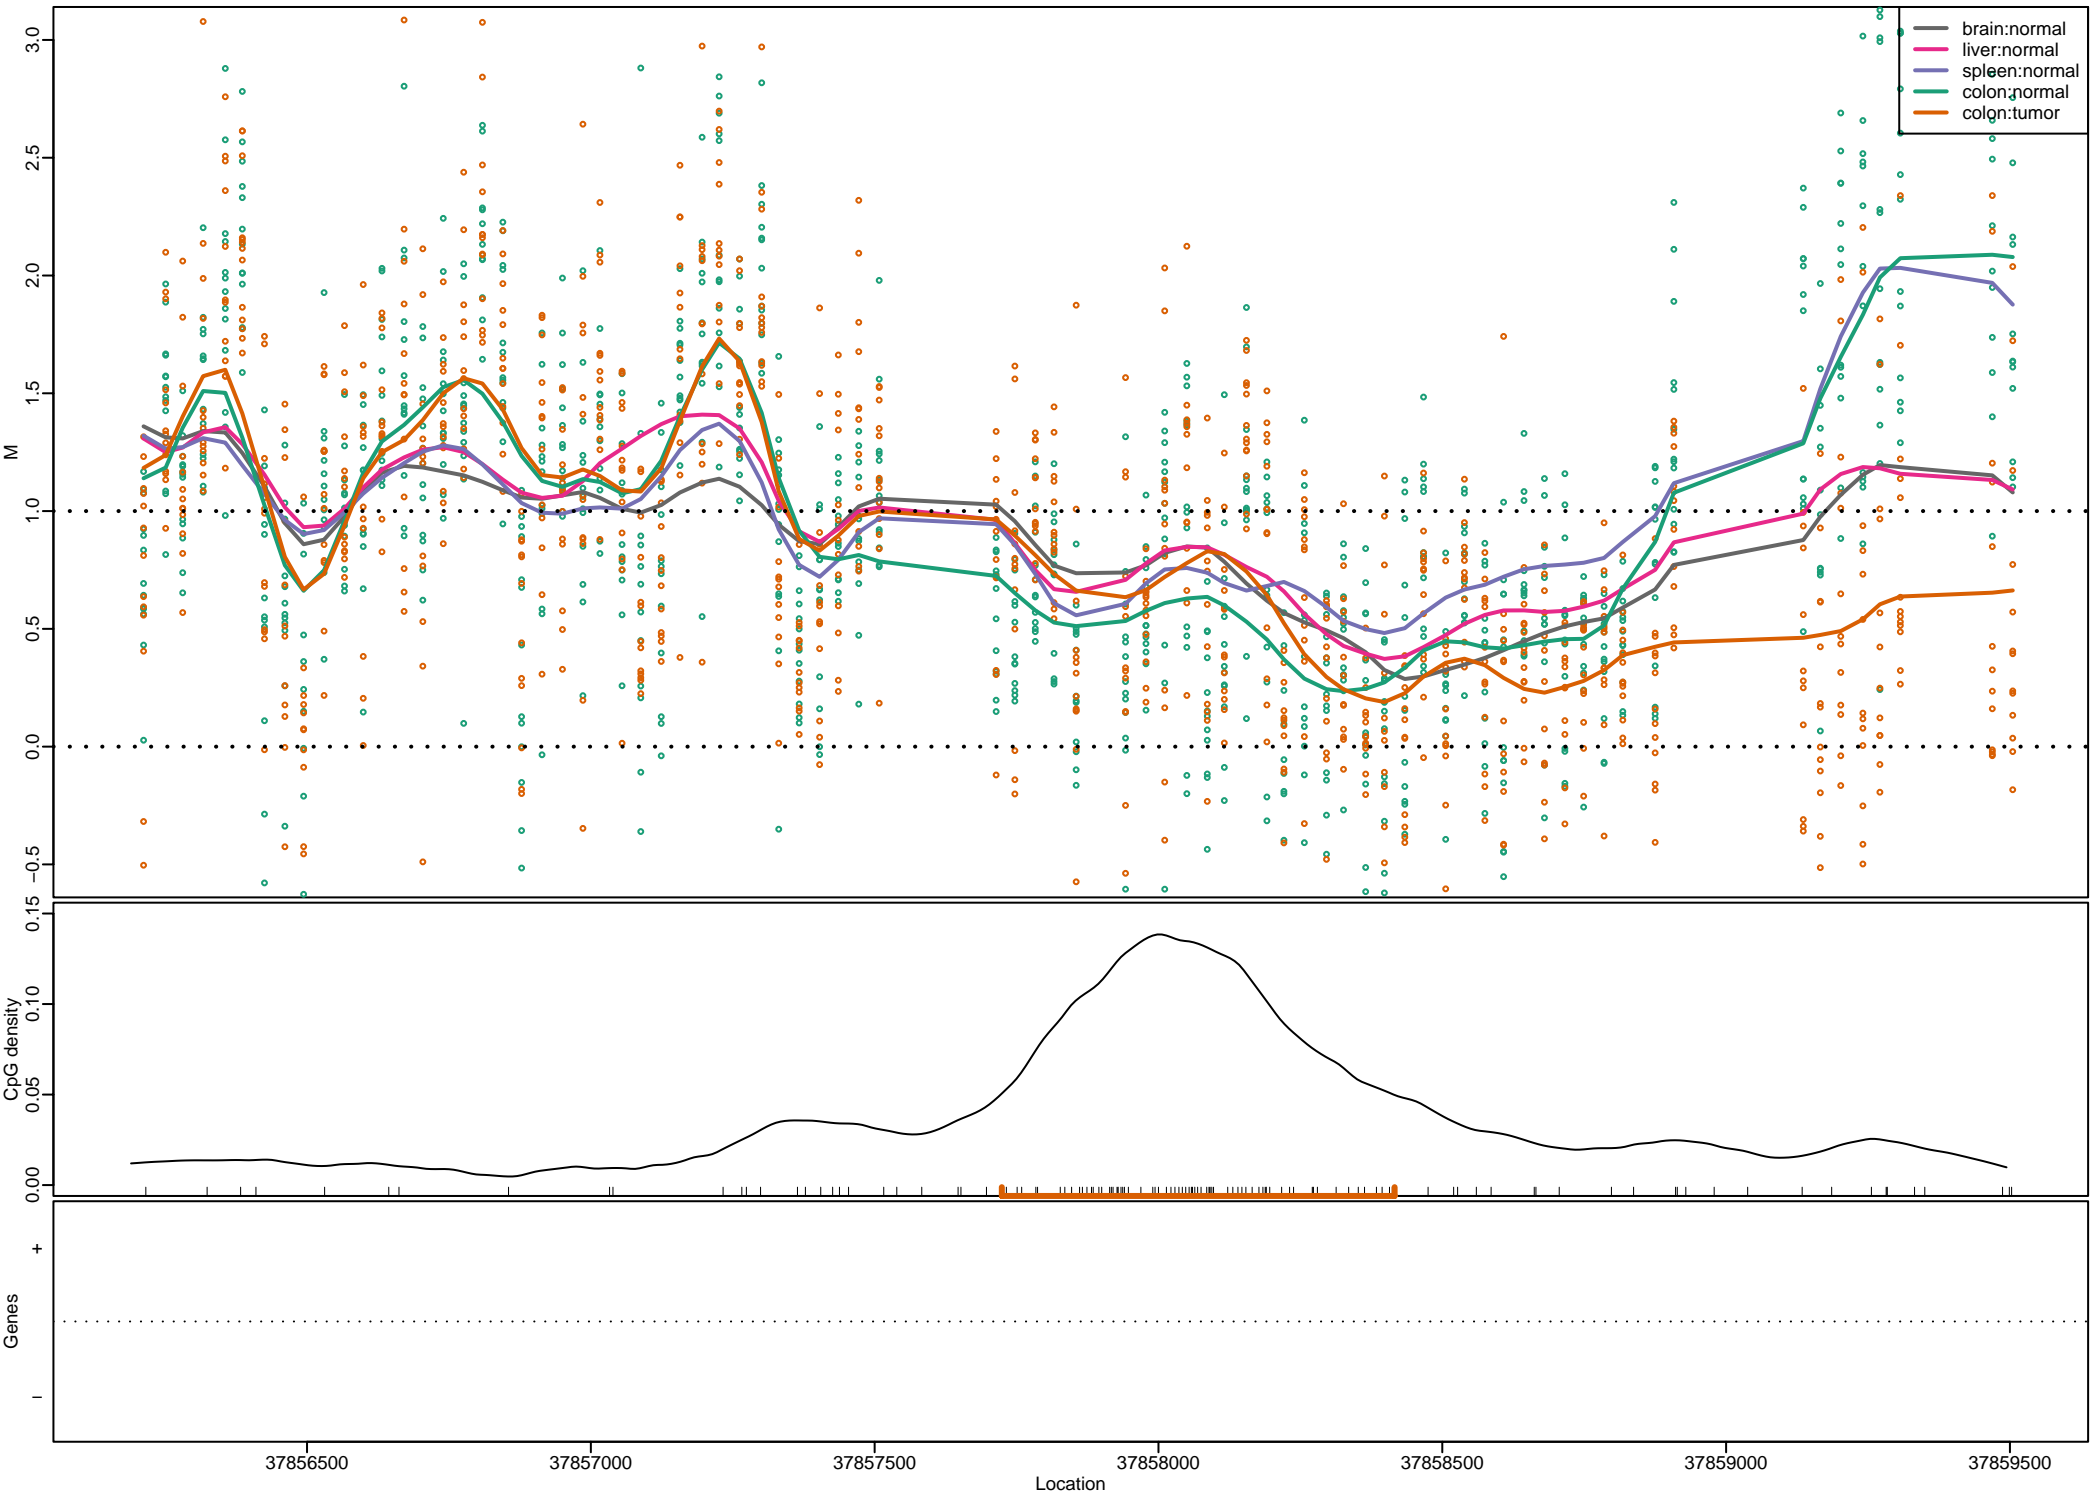

ID:12--chr2:147060700-147063203

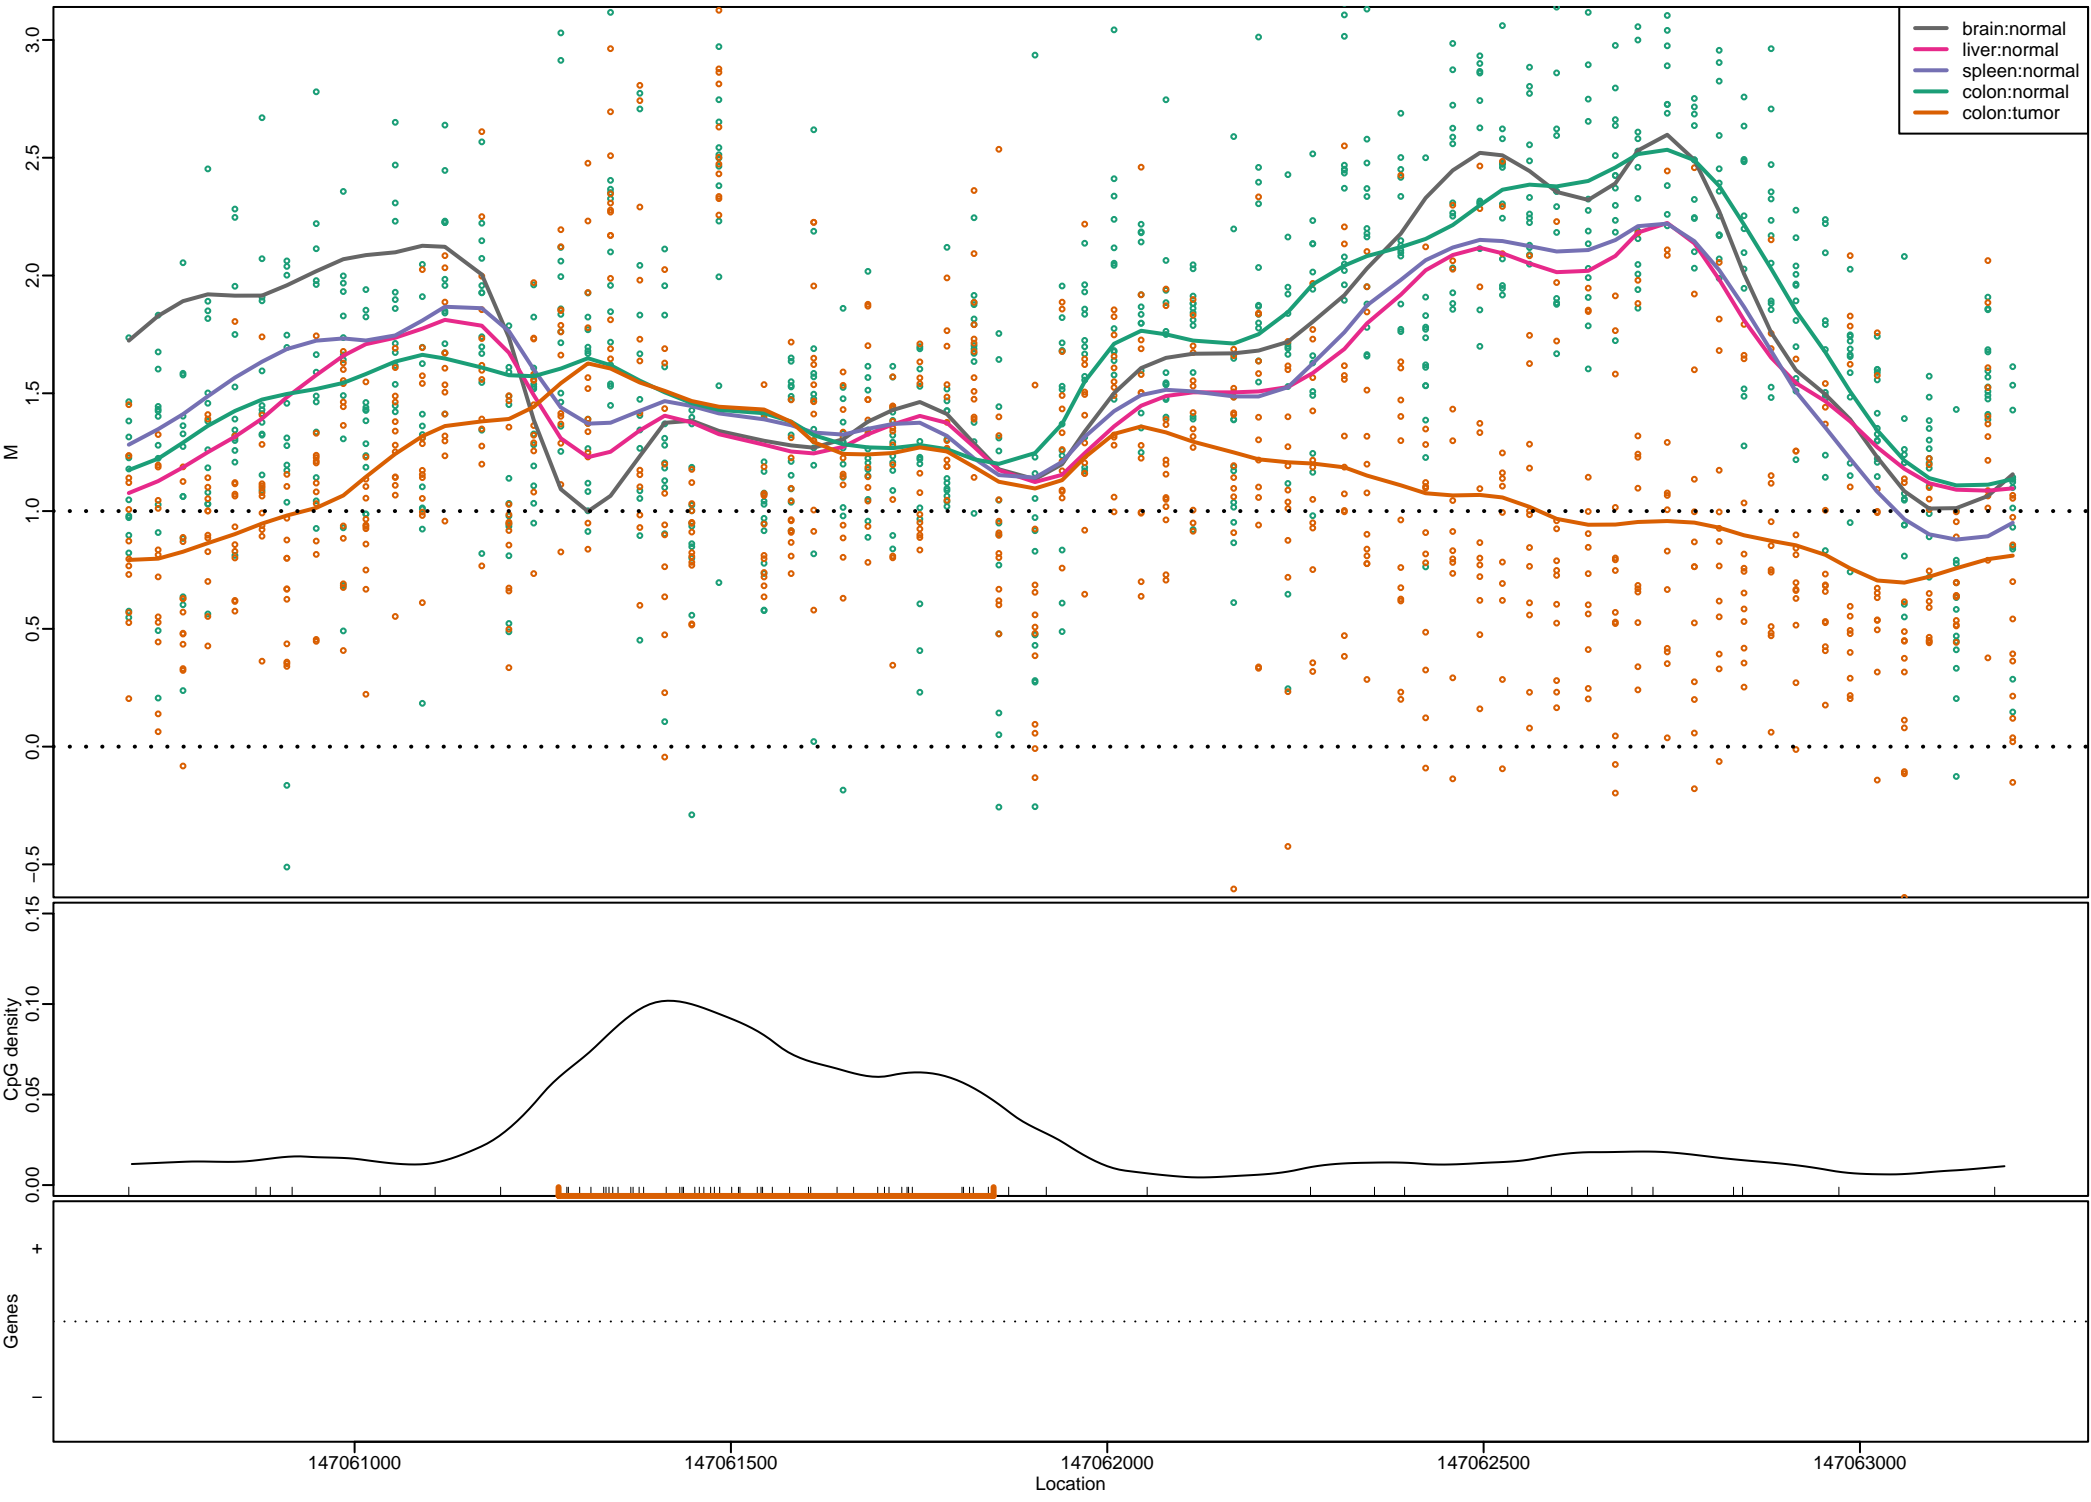

ID:13--chr22:35335058-35337215

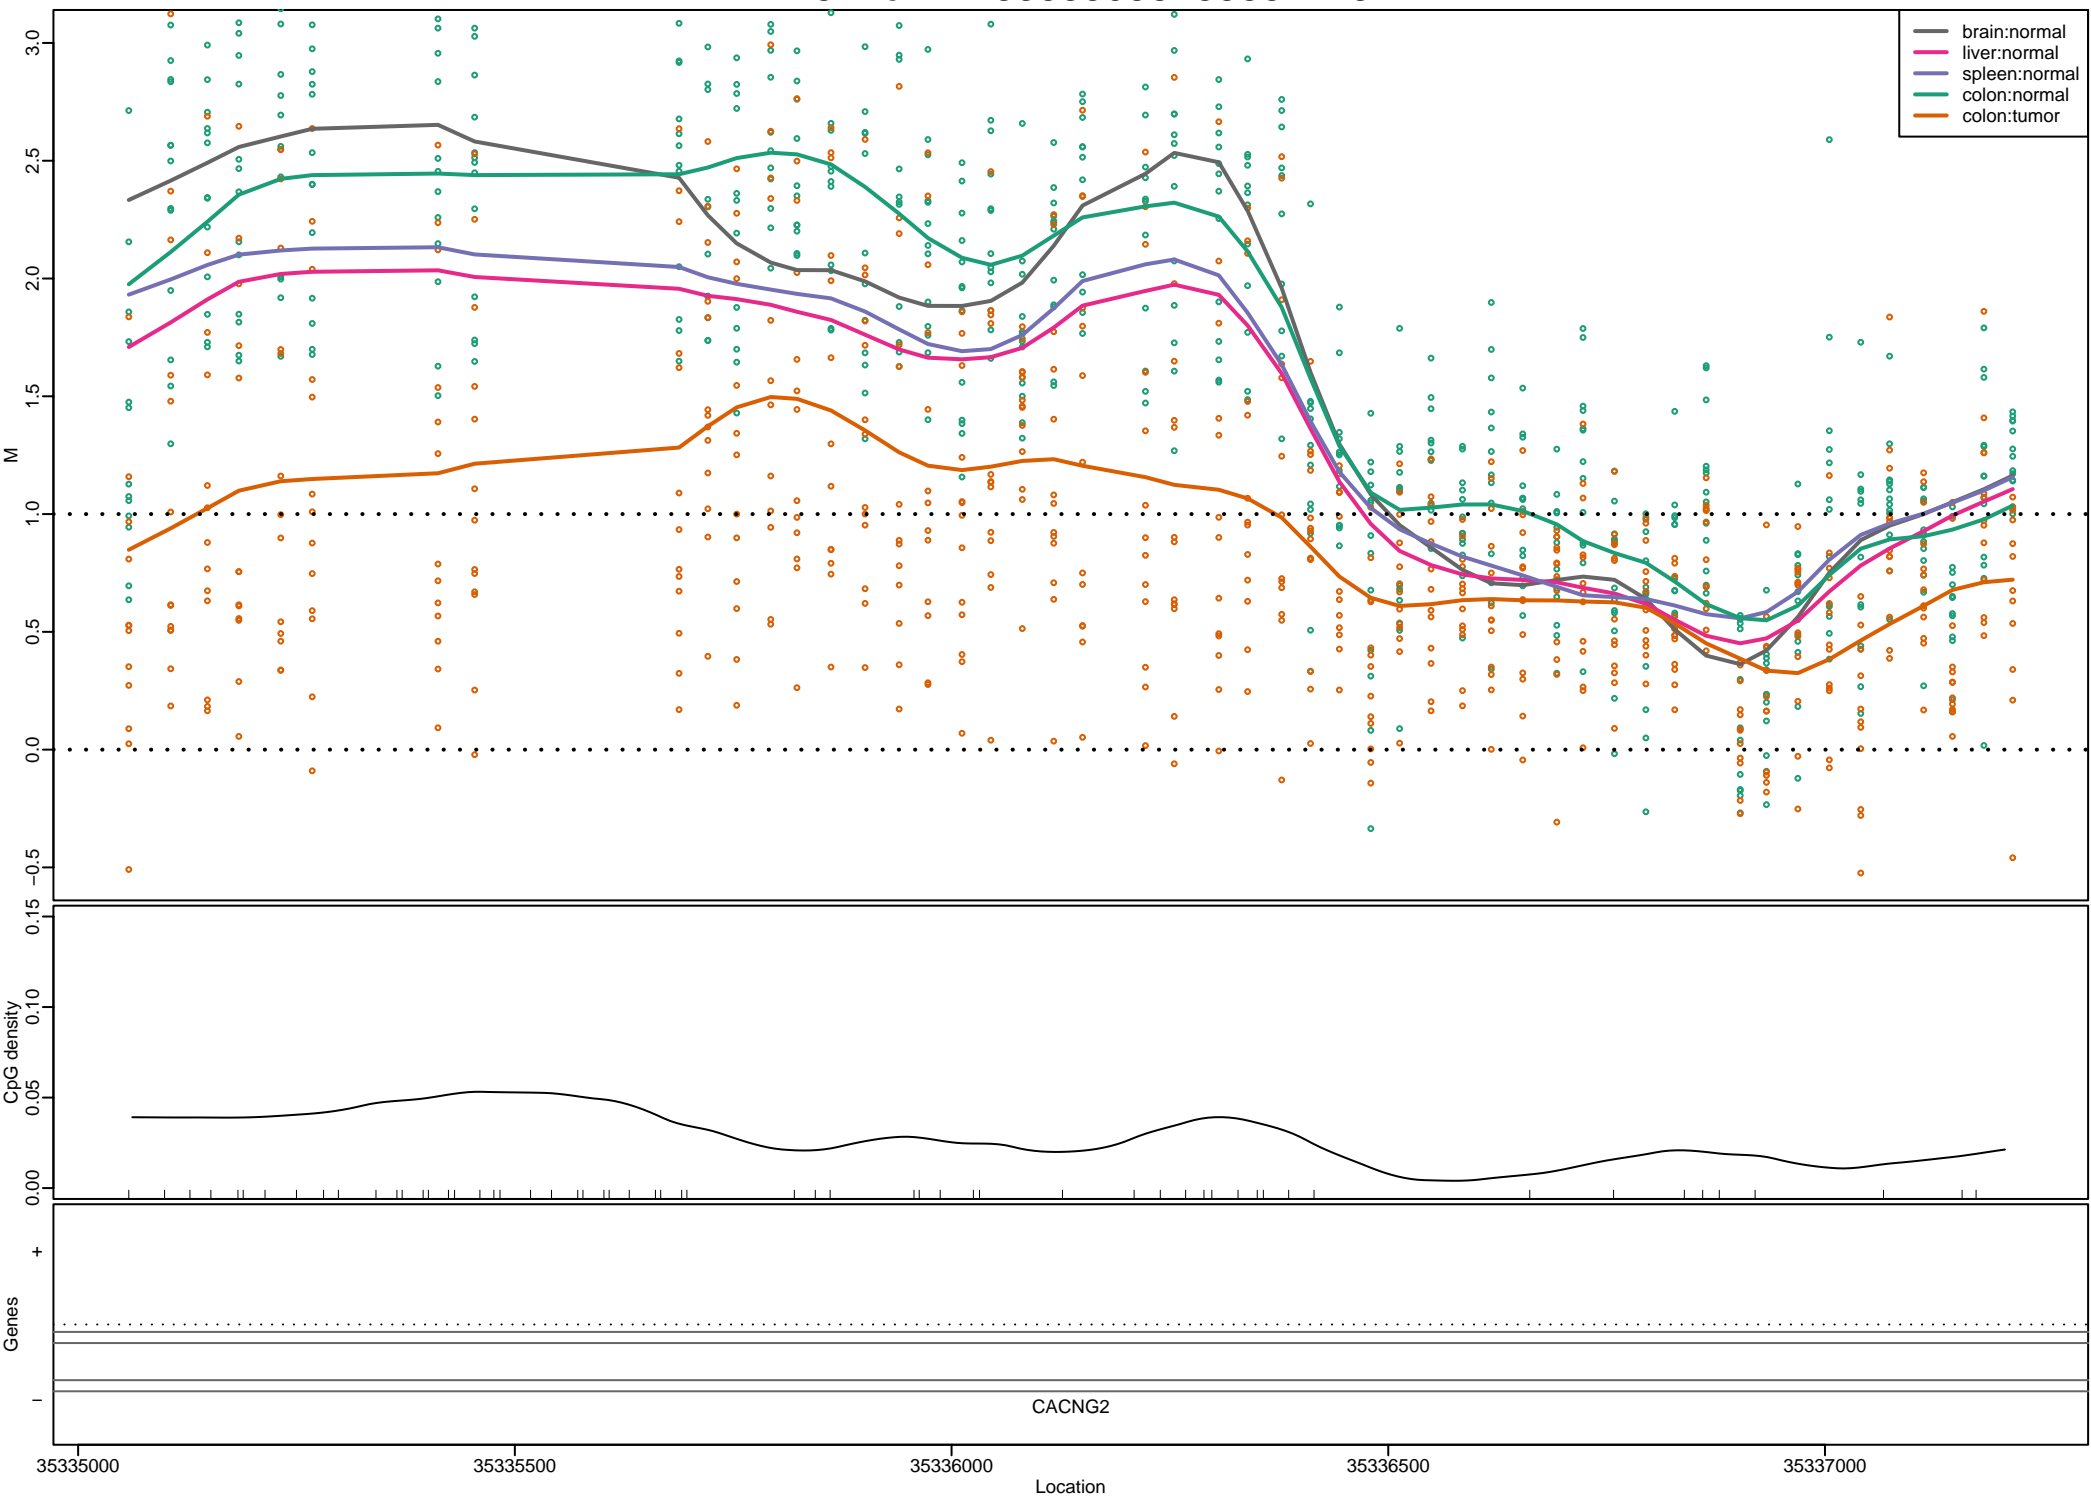

ID:14--chr22:48411472-48414669

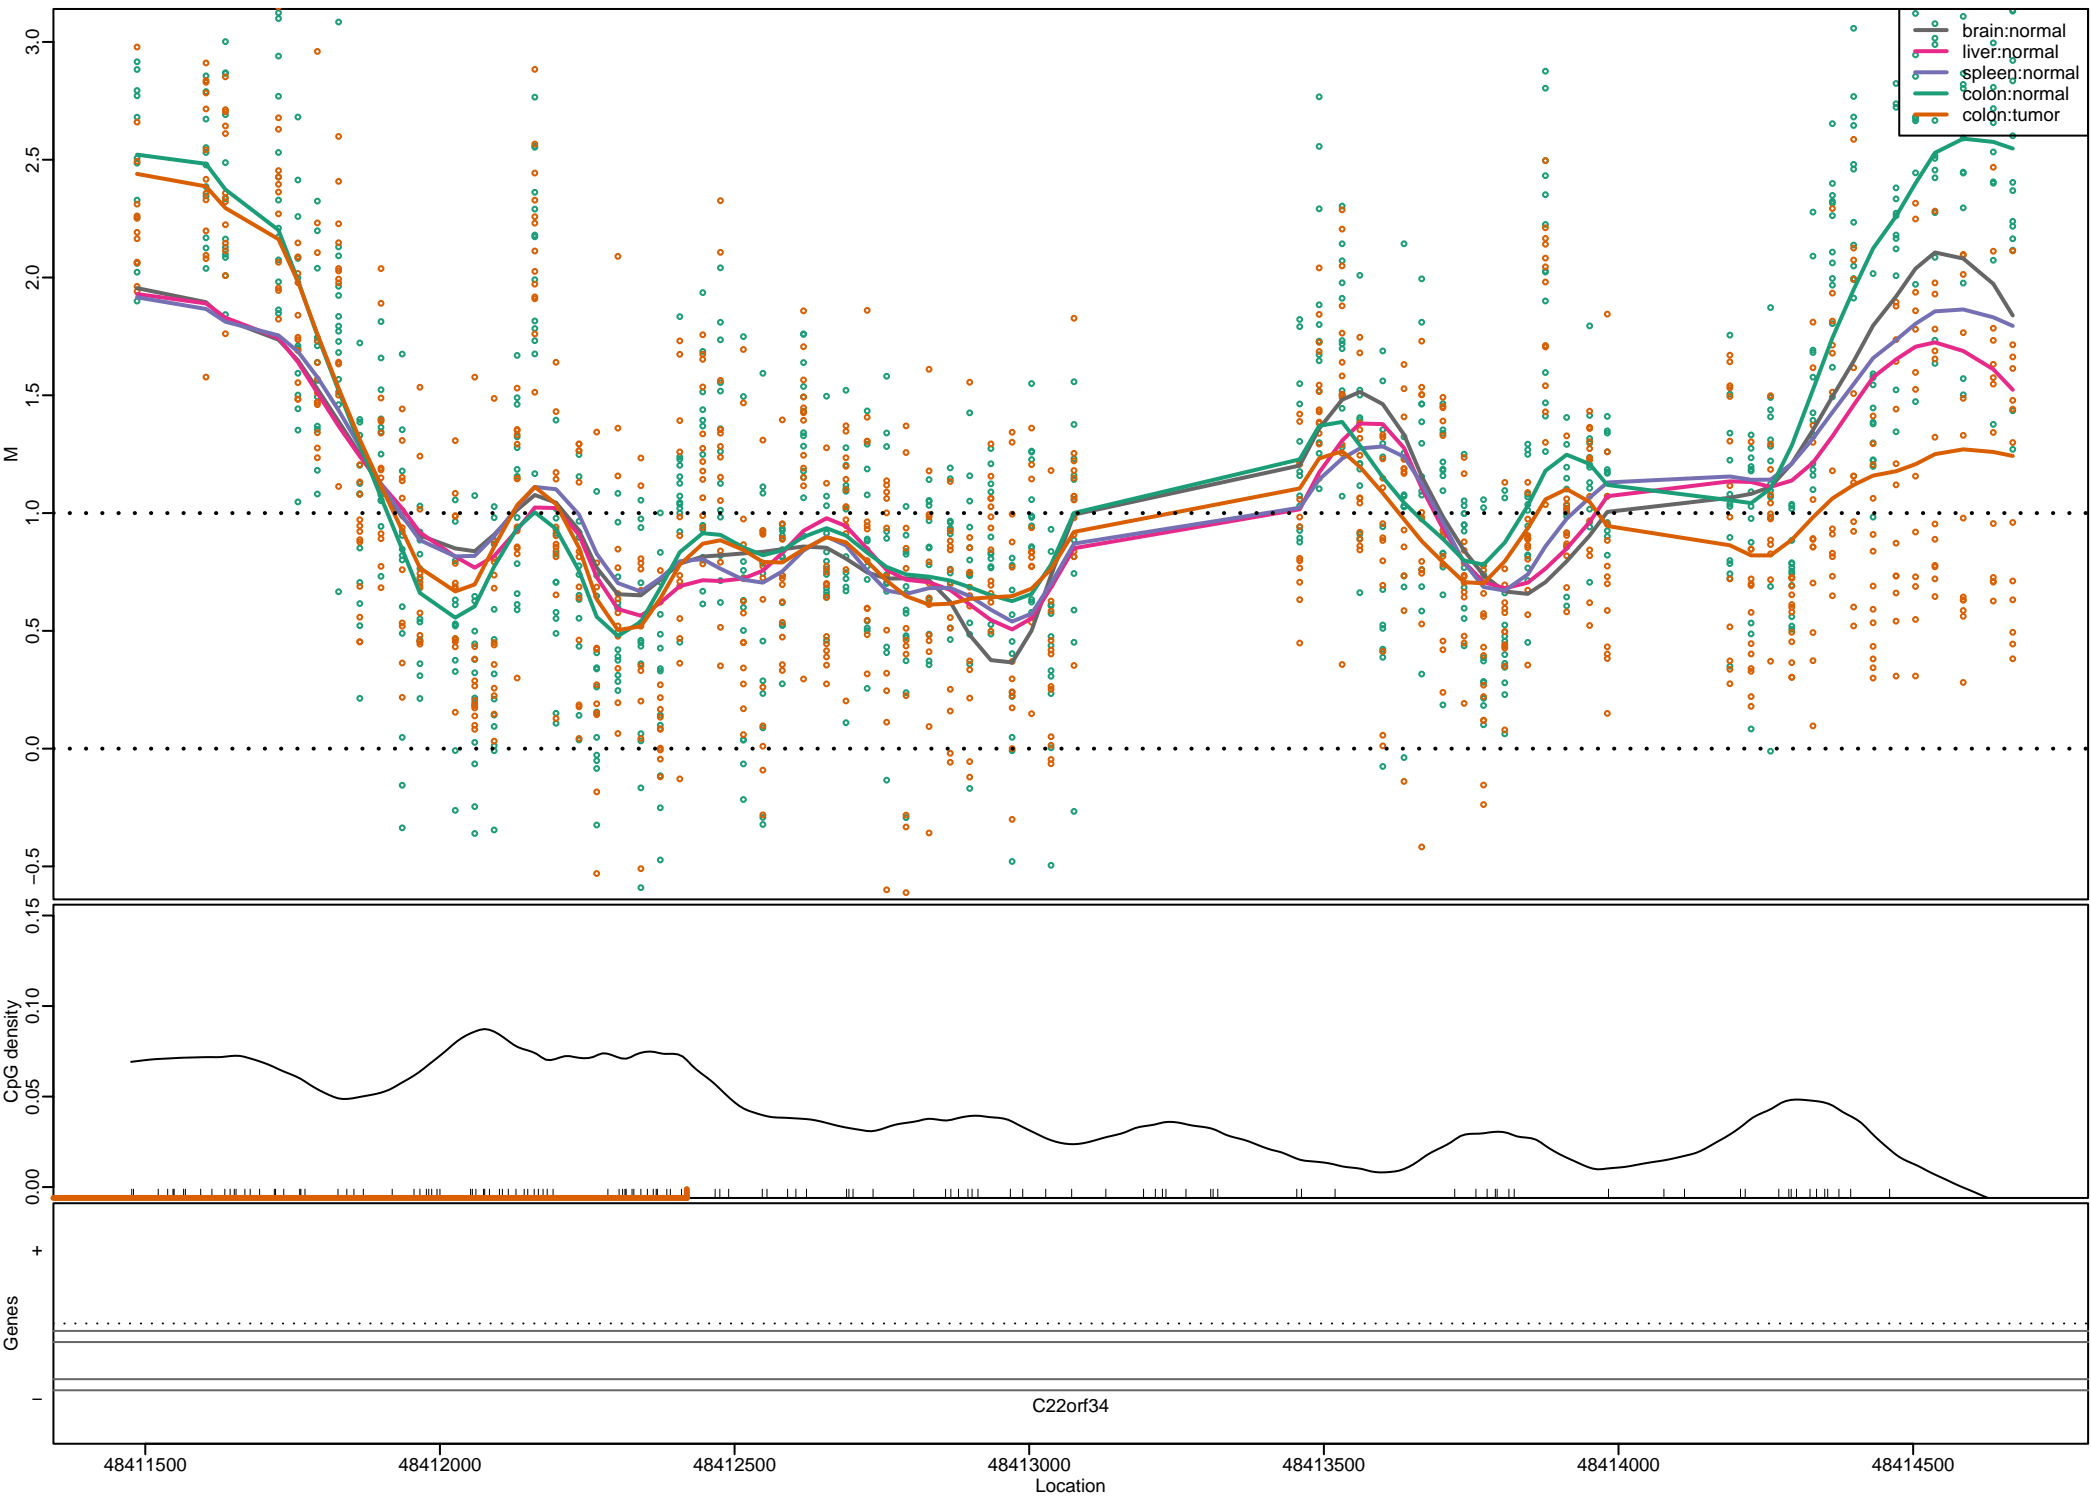

ID:15--chr3:193607217-193610384

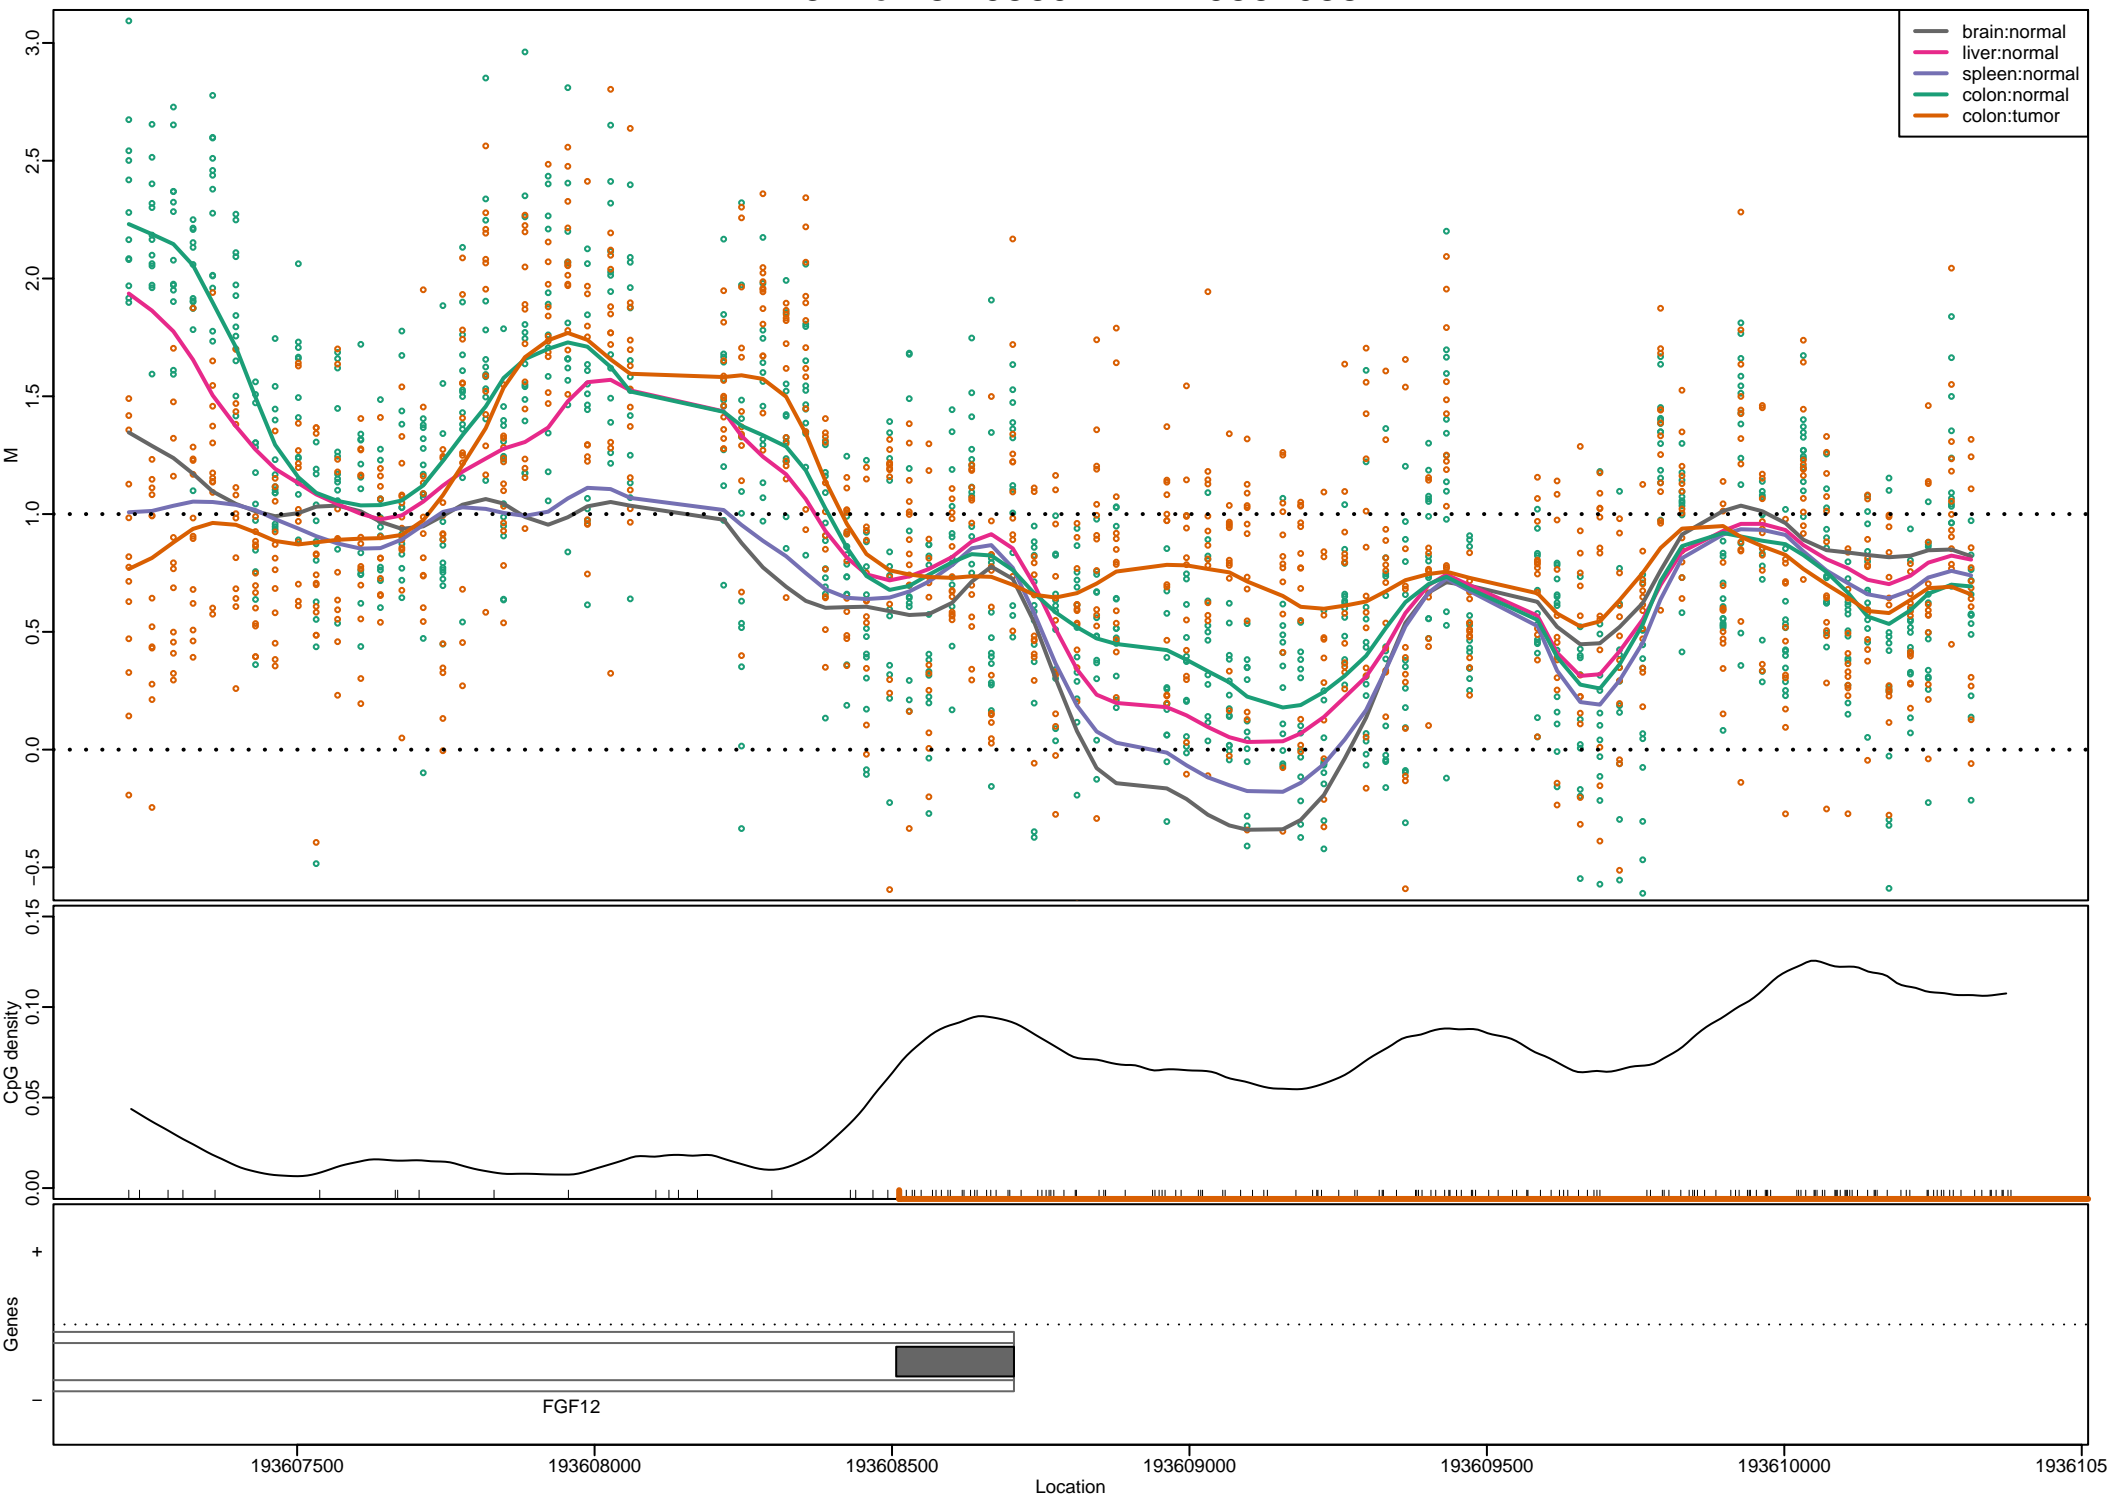



ID:16--chr3:82629728-82630394

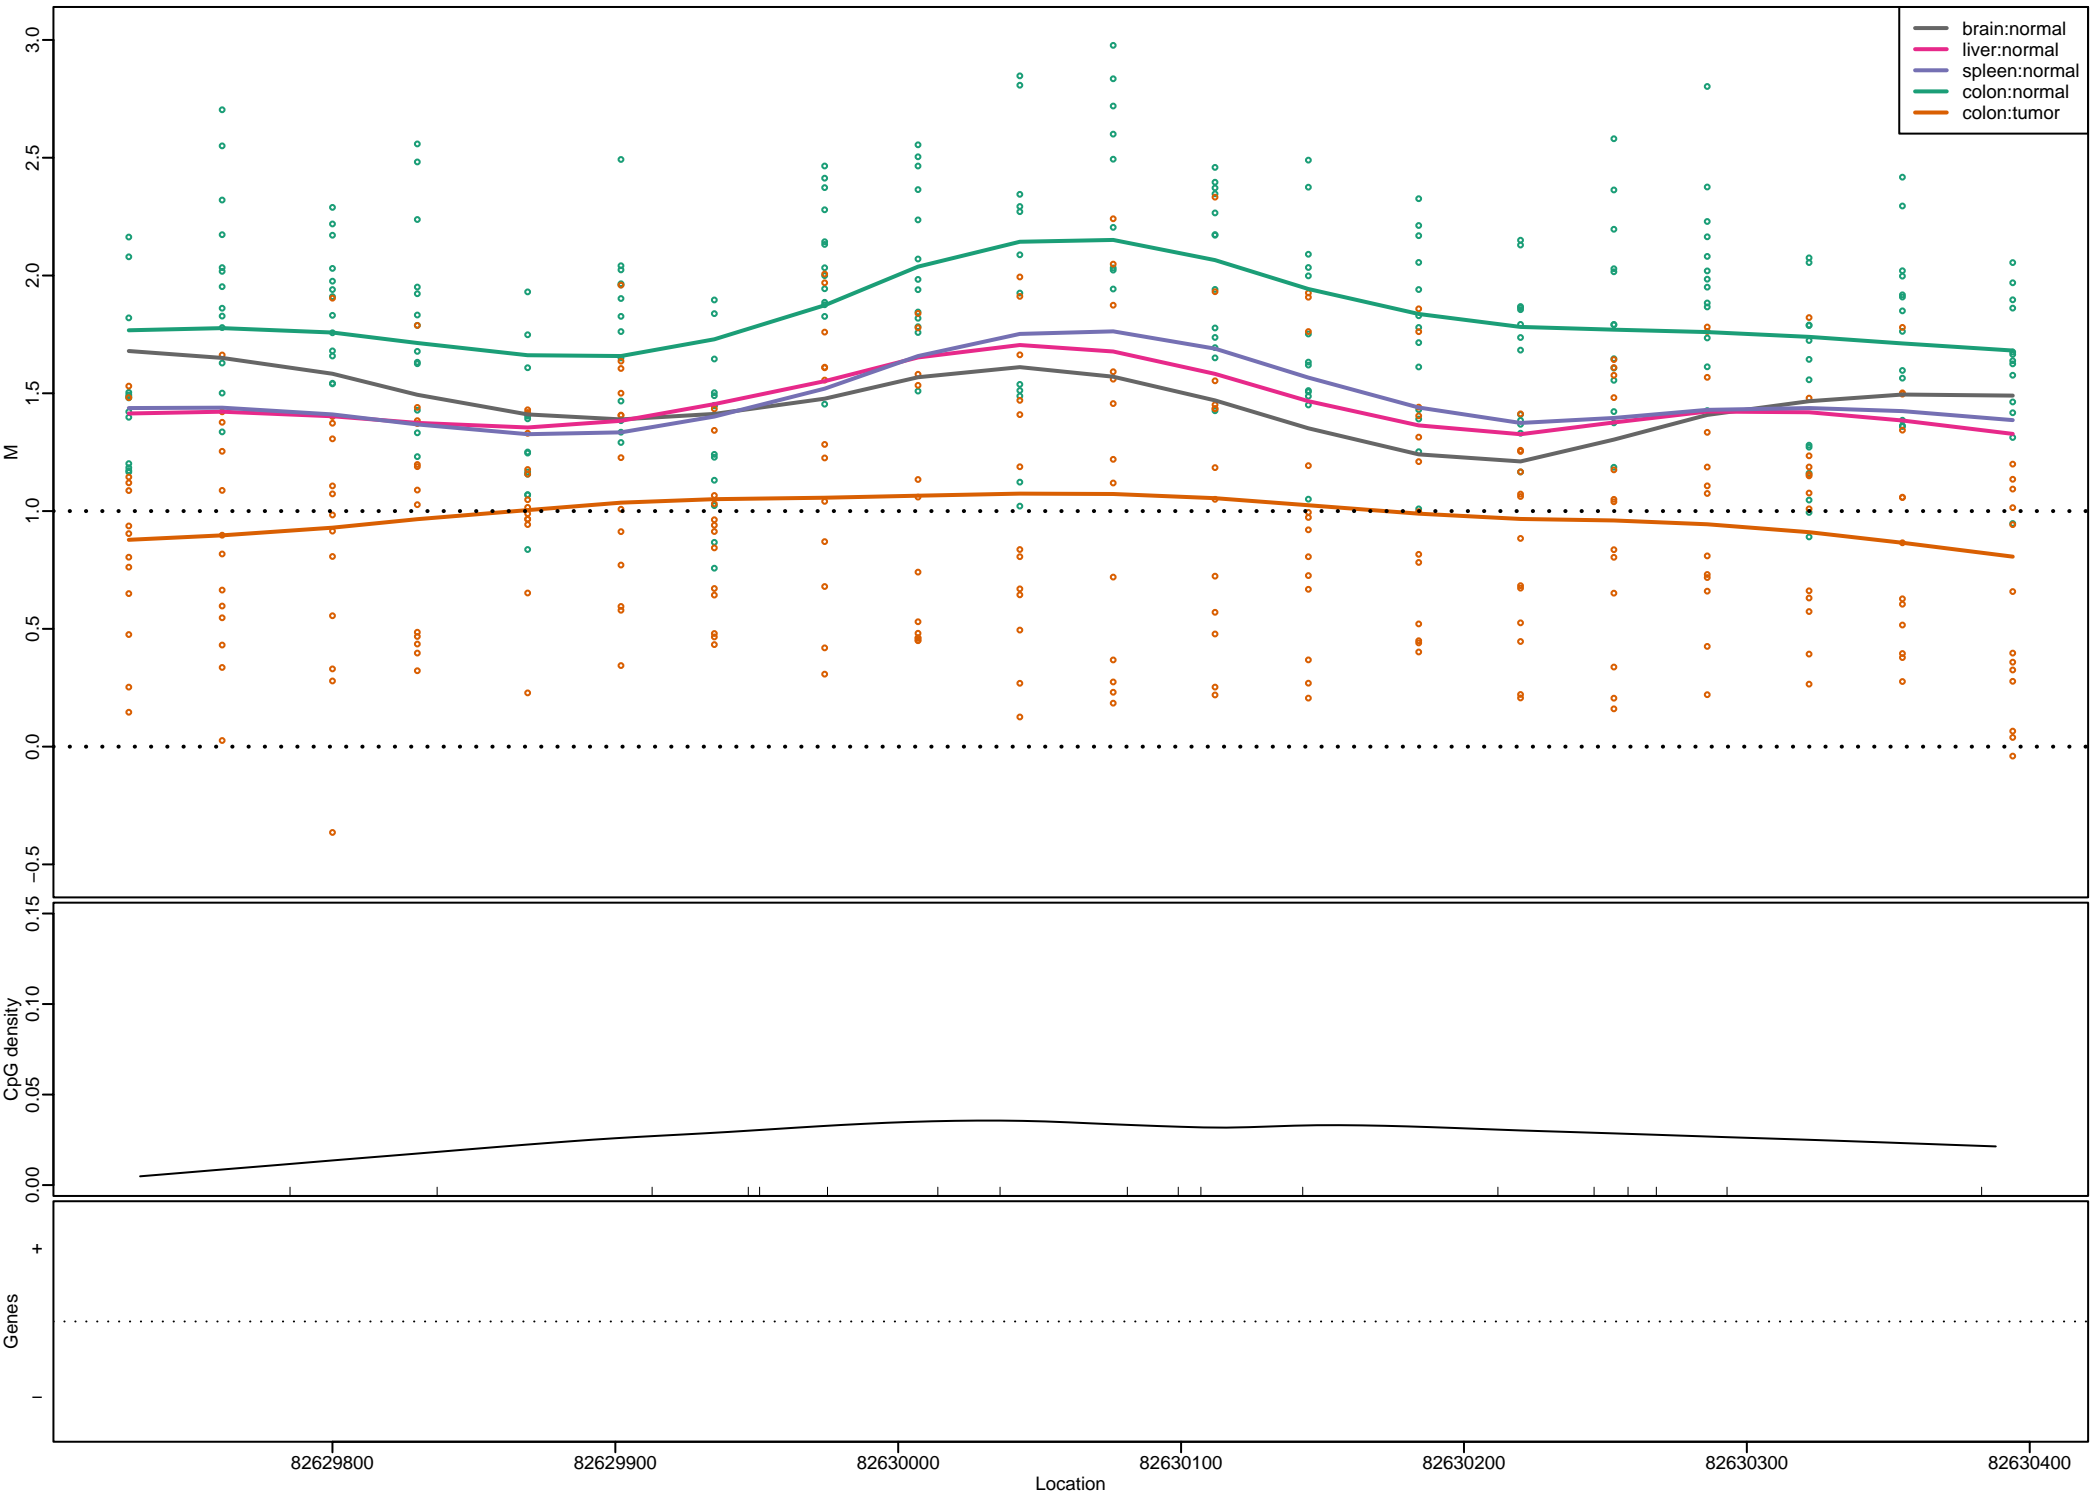

ID:17--chr4:62618513-62619140

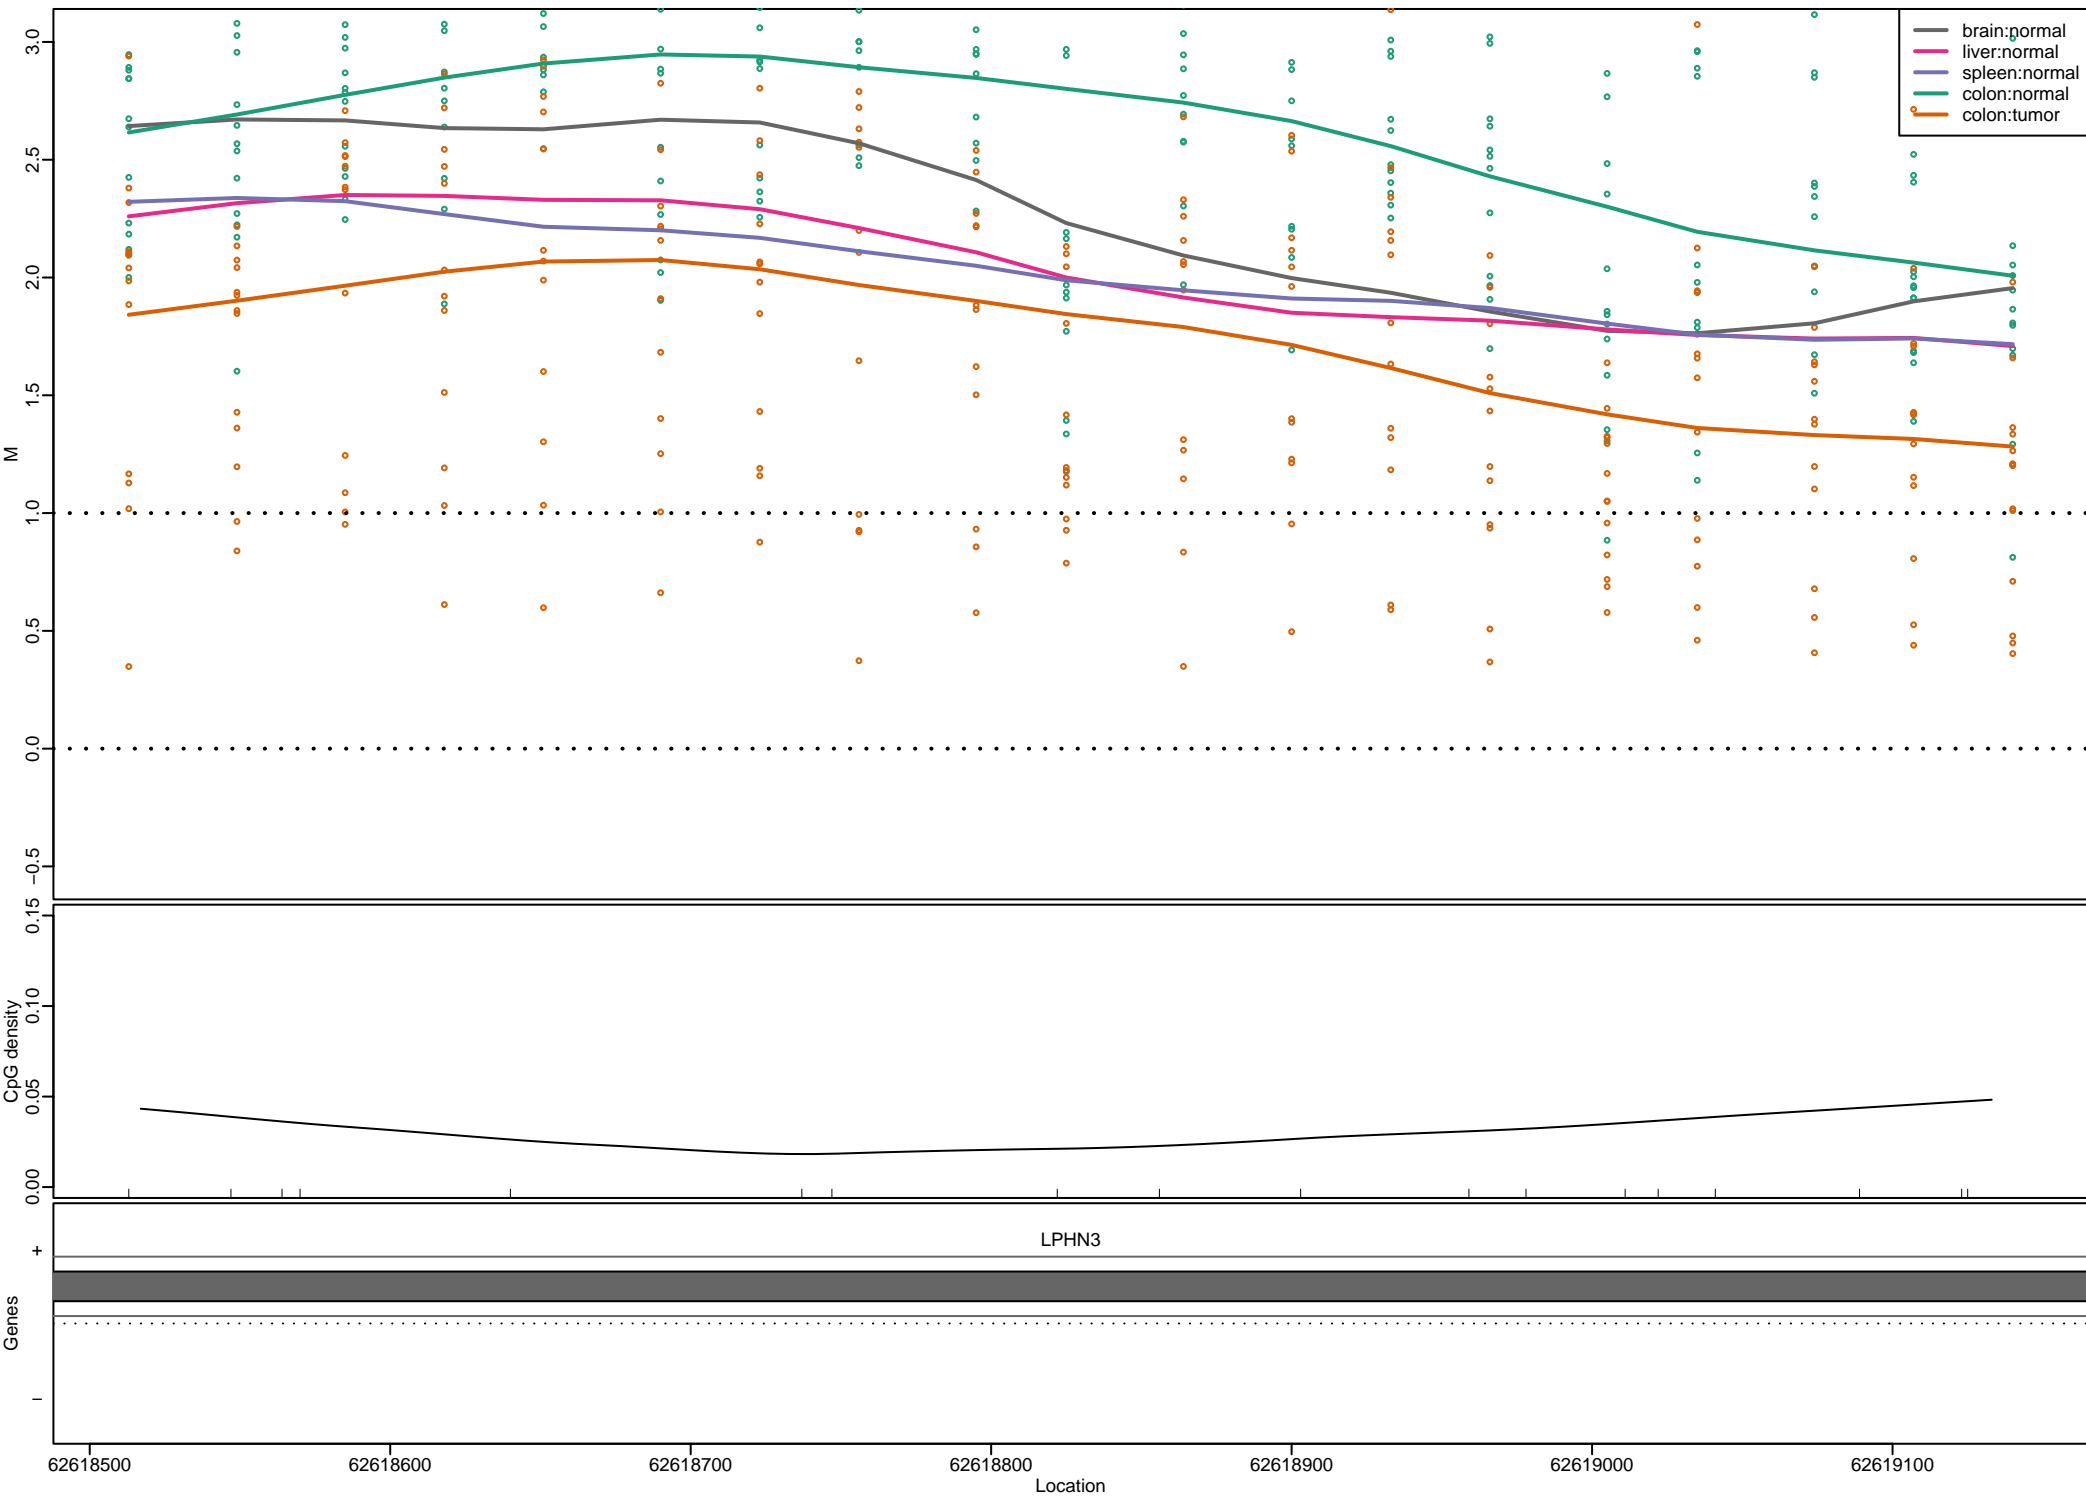

ID:18--chr5:1718233-1722329

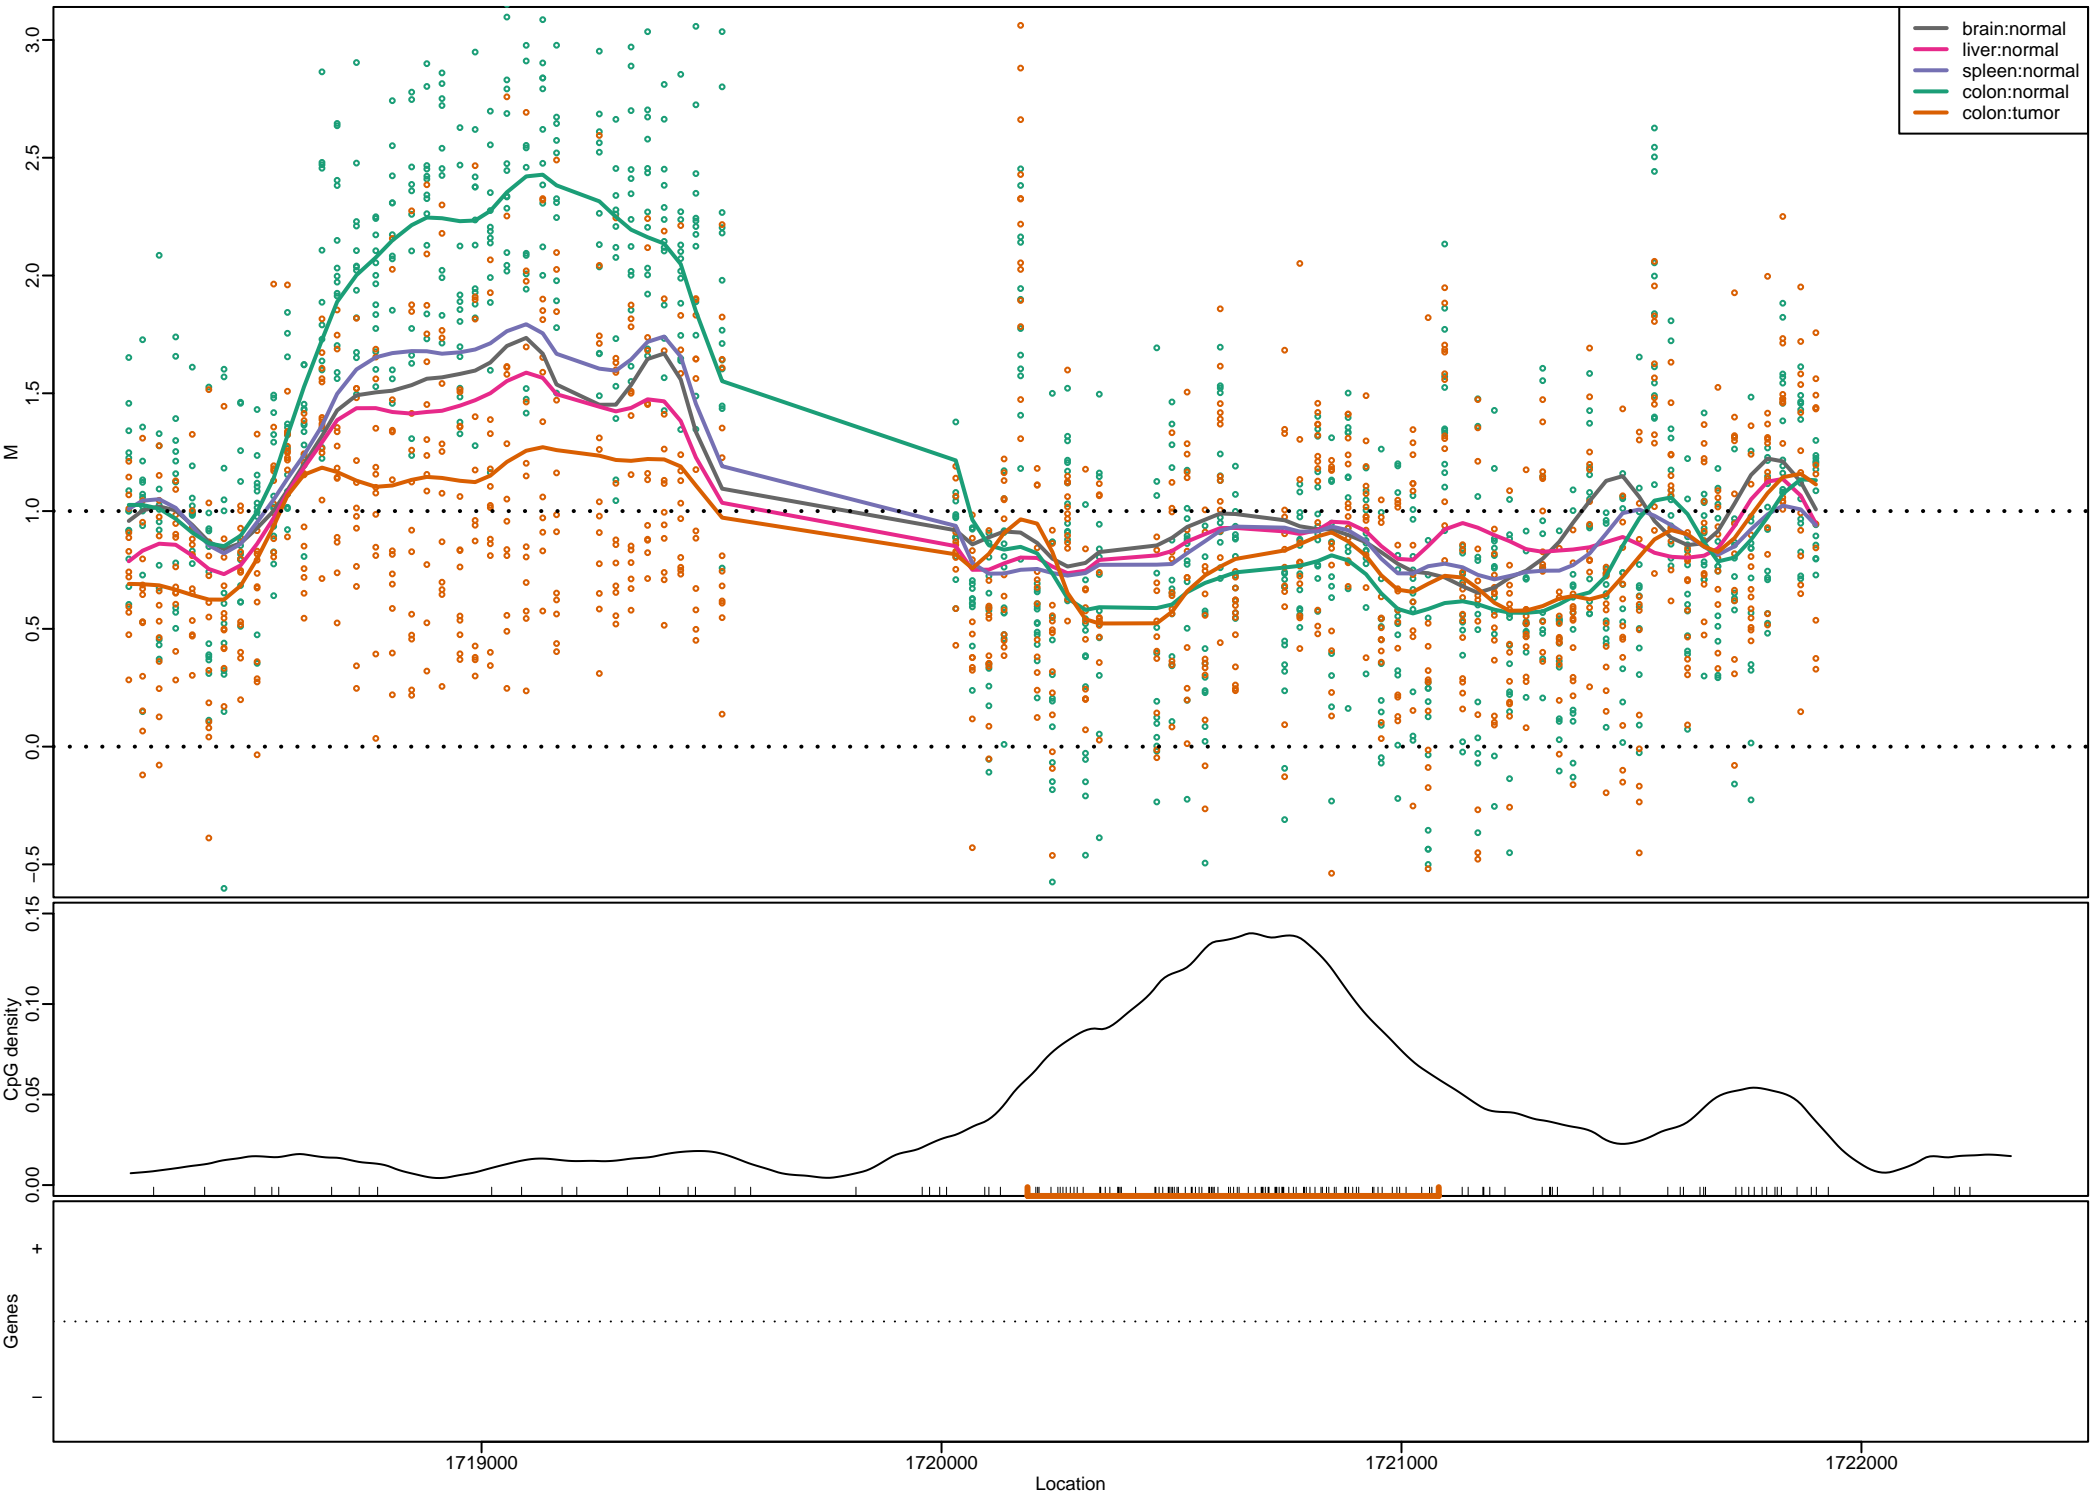

ID:19--chr6:52635927-52638747

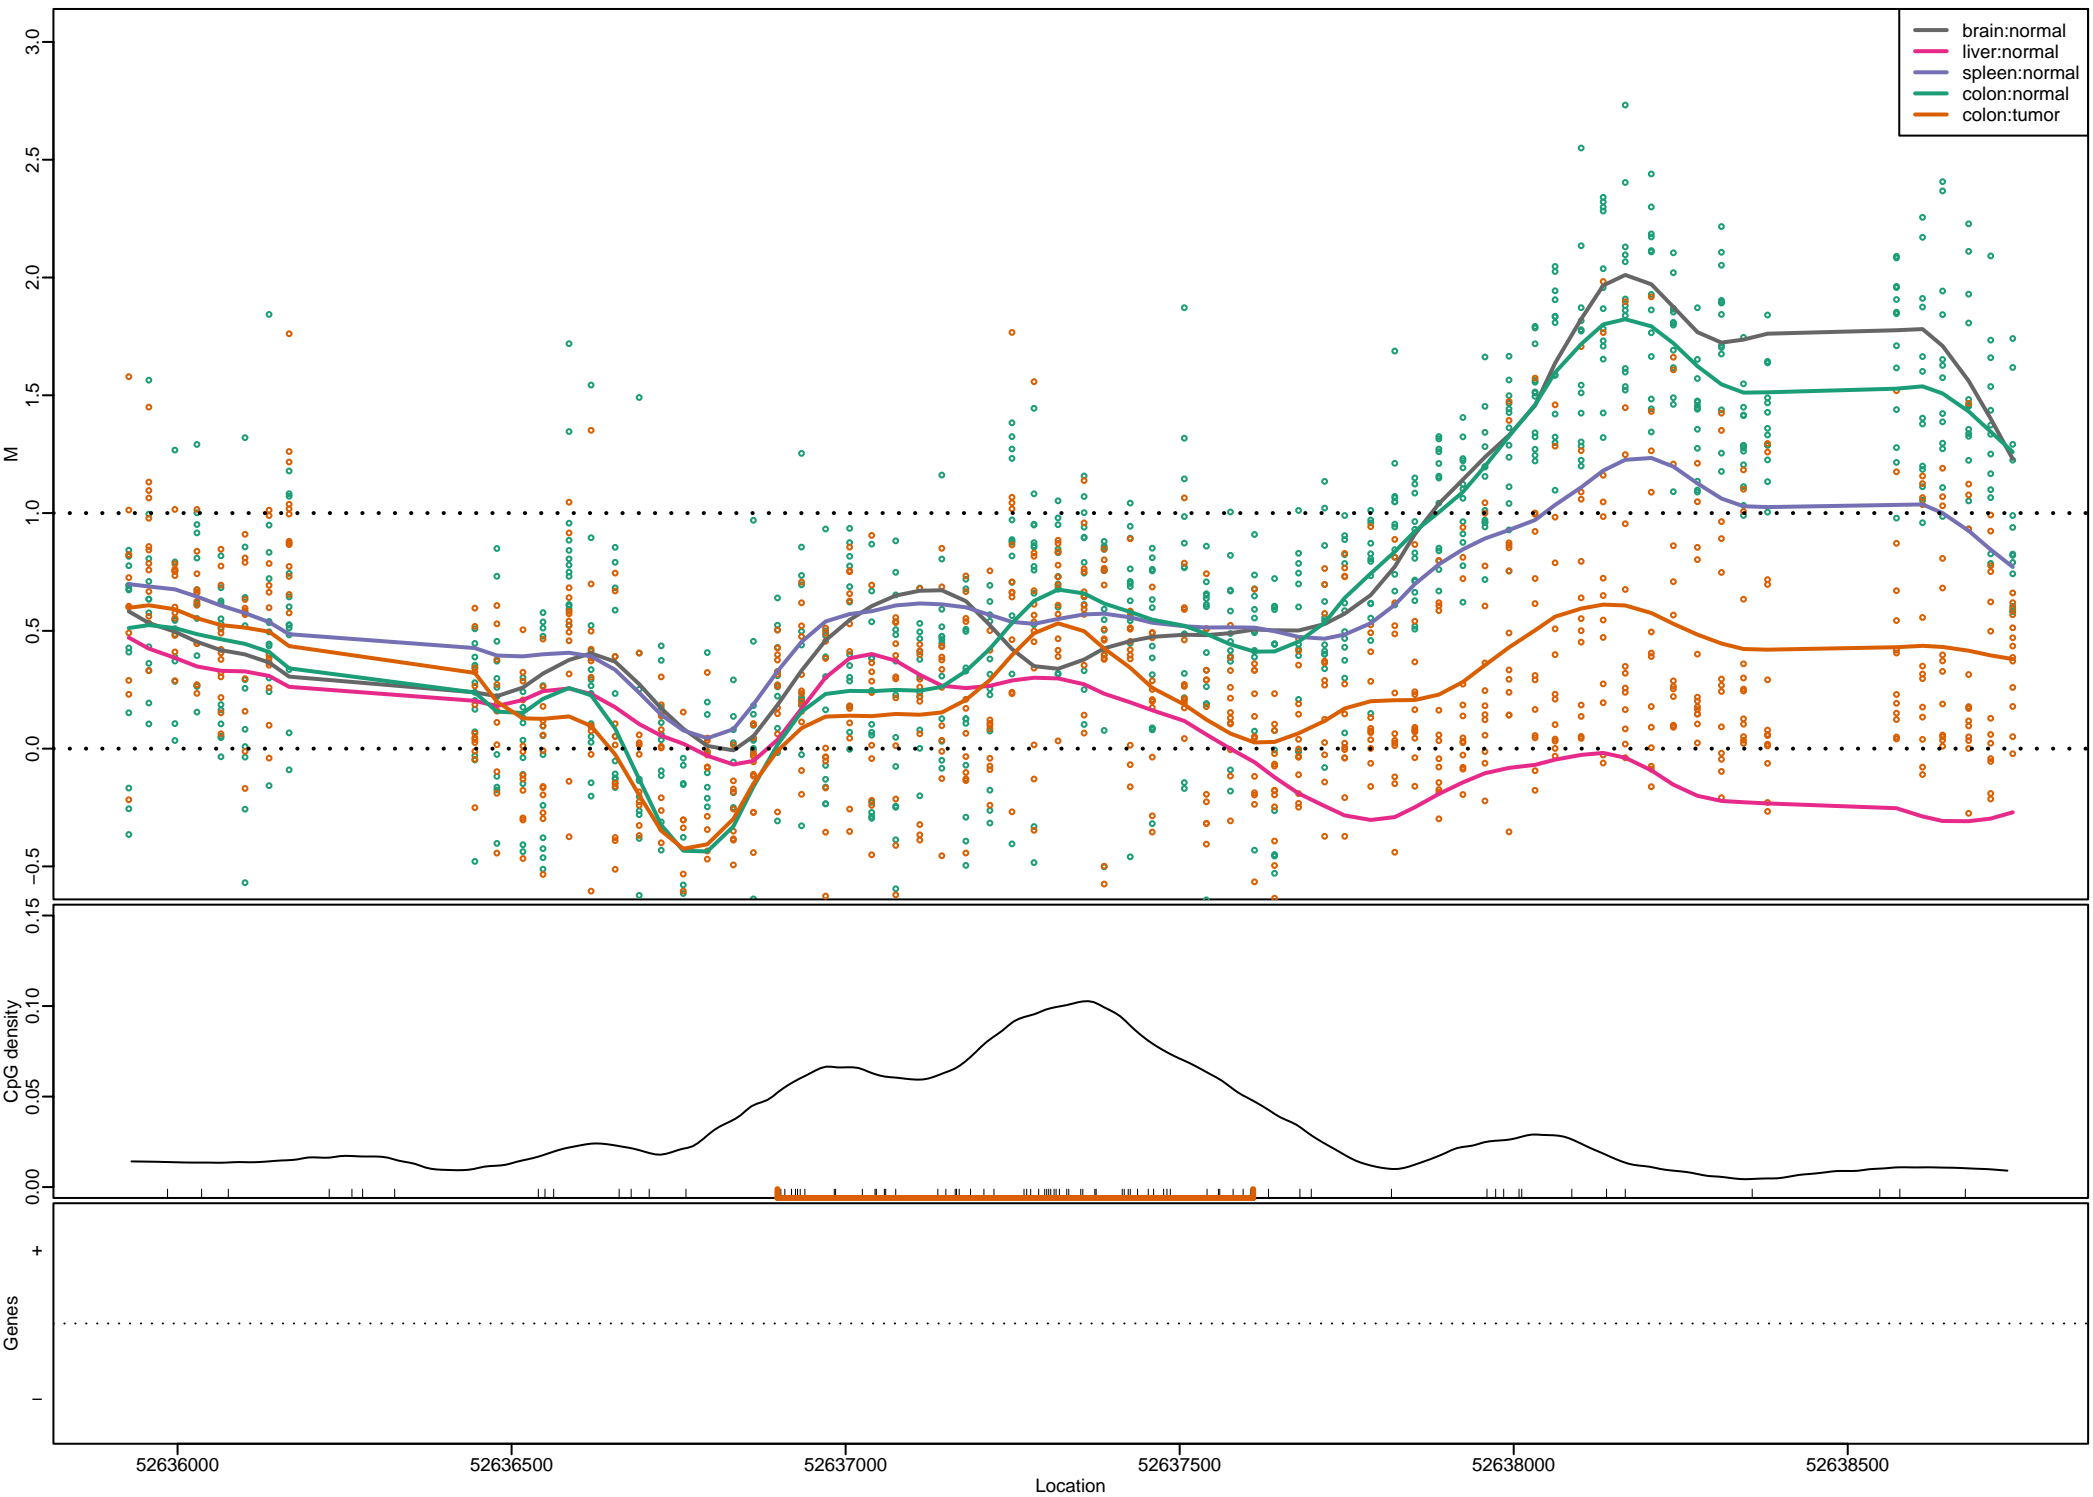

ID:20--chr7:153216931-153220275

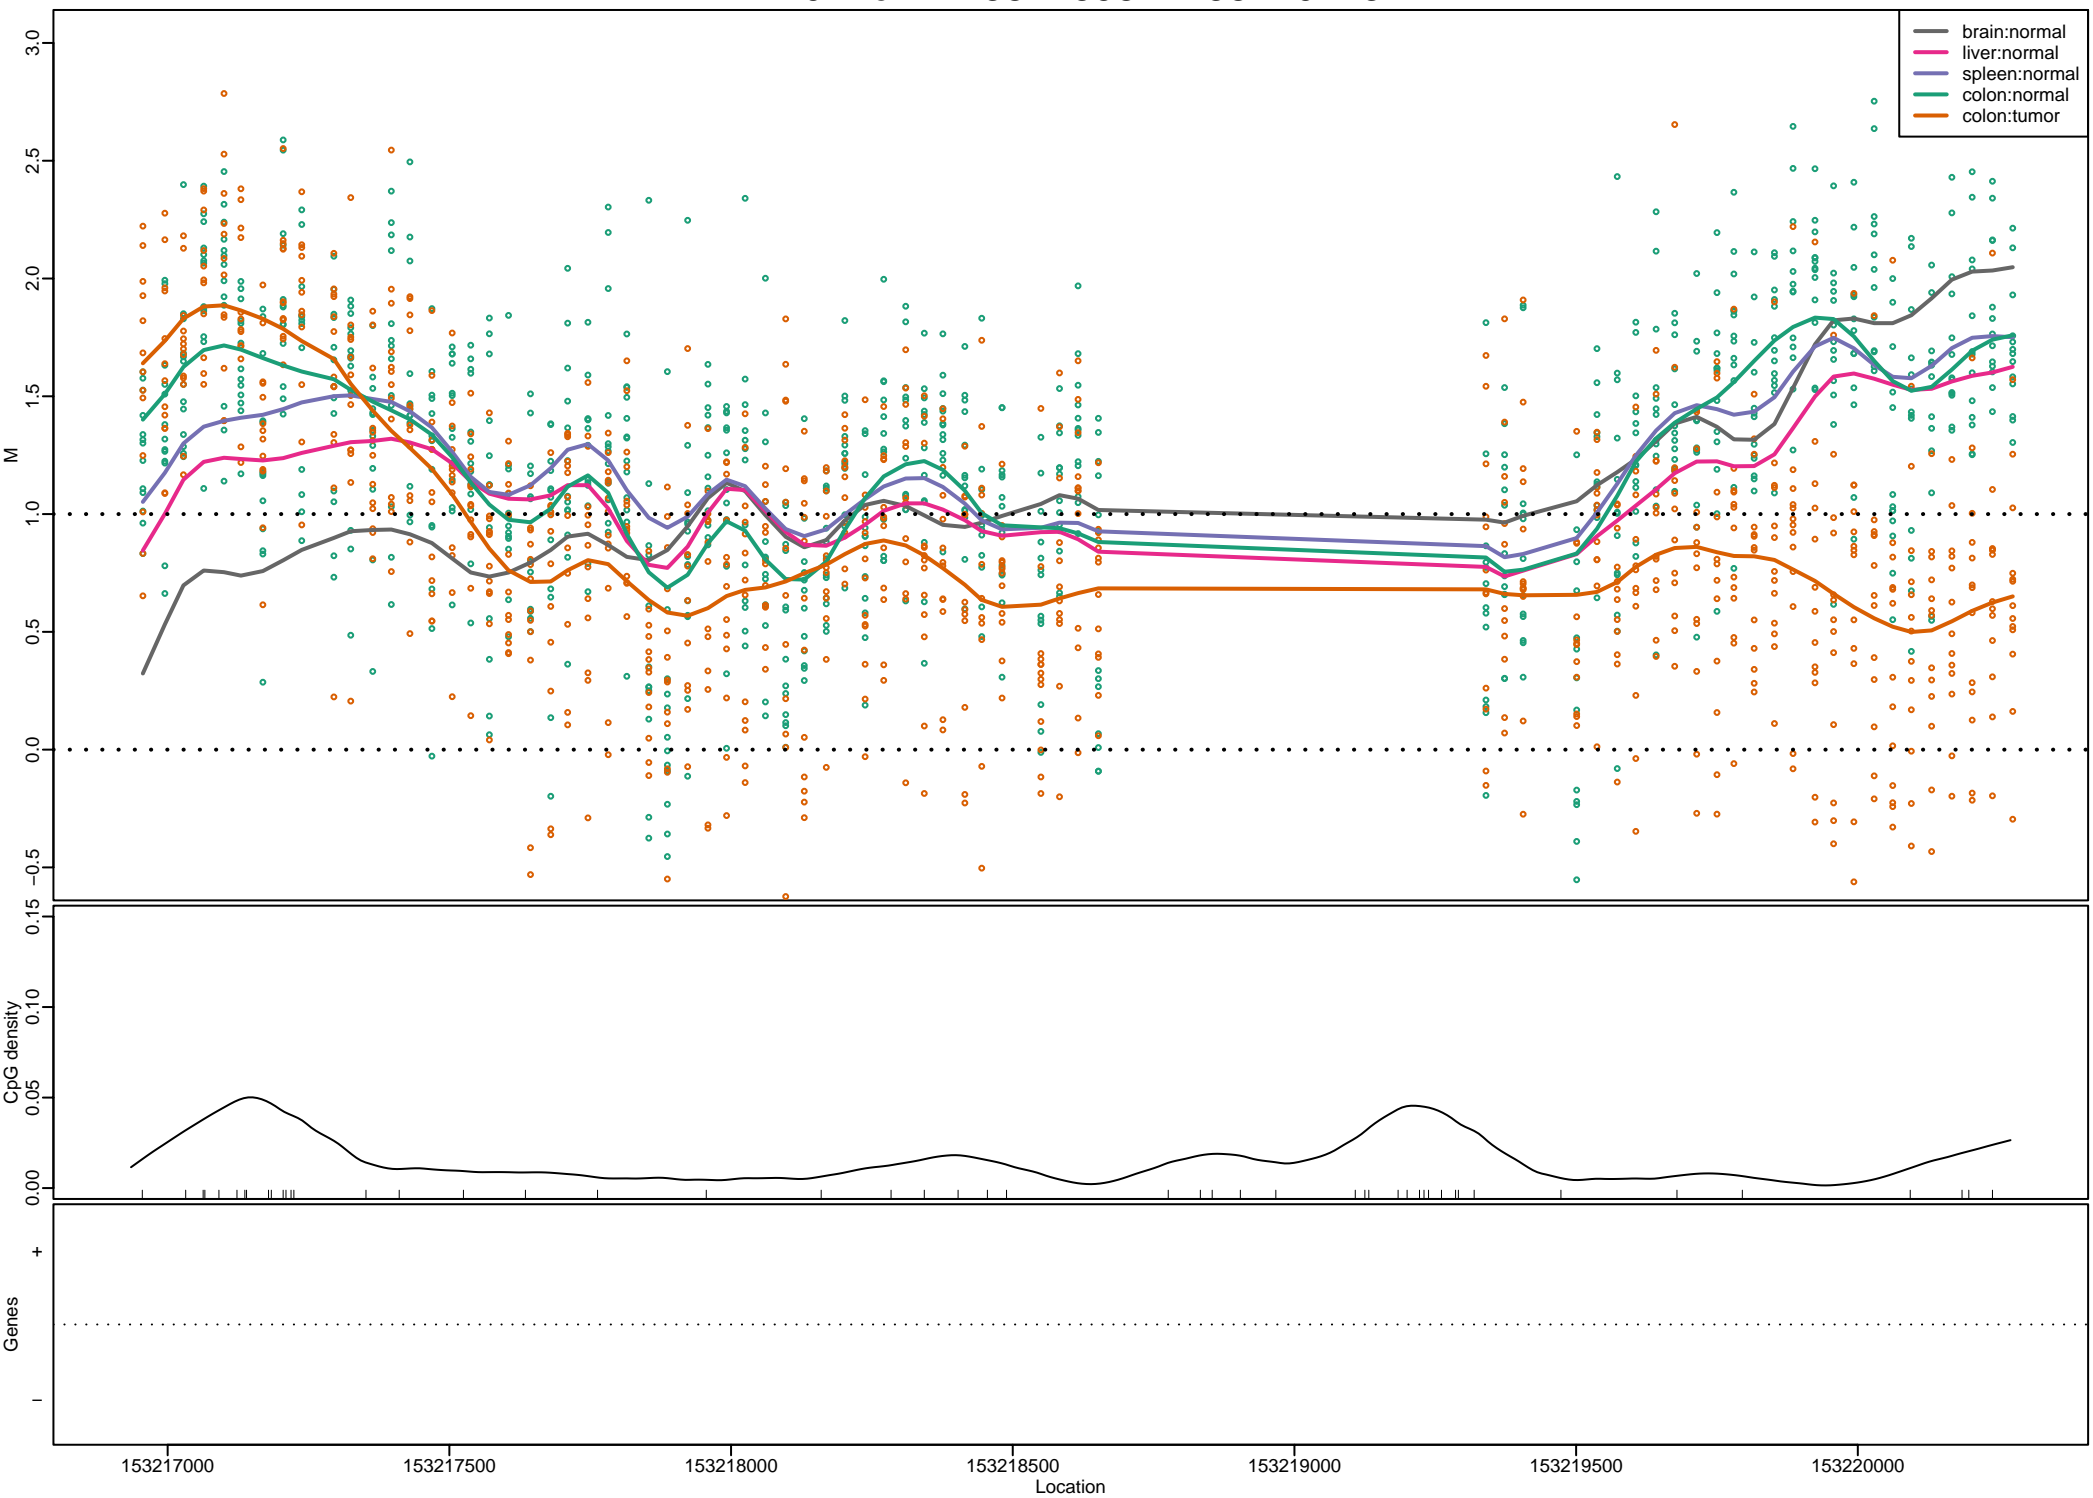

ID:21--chr7:27106893-27110531

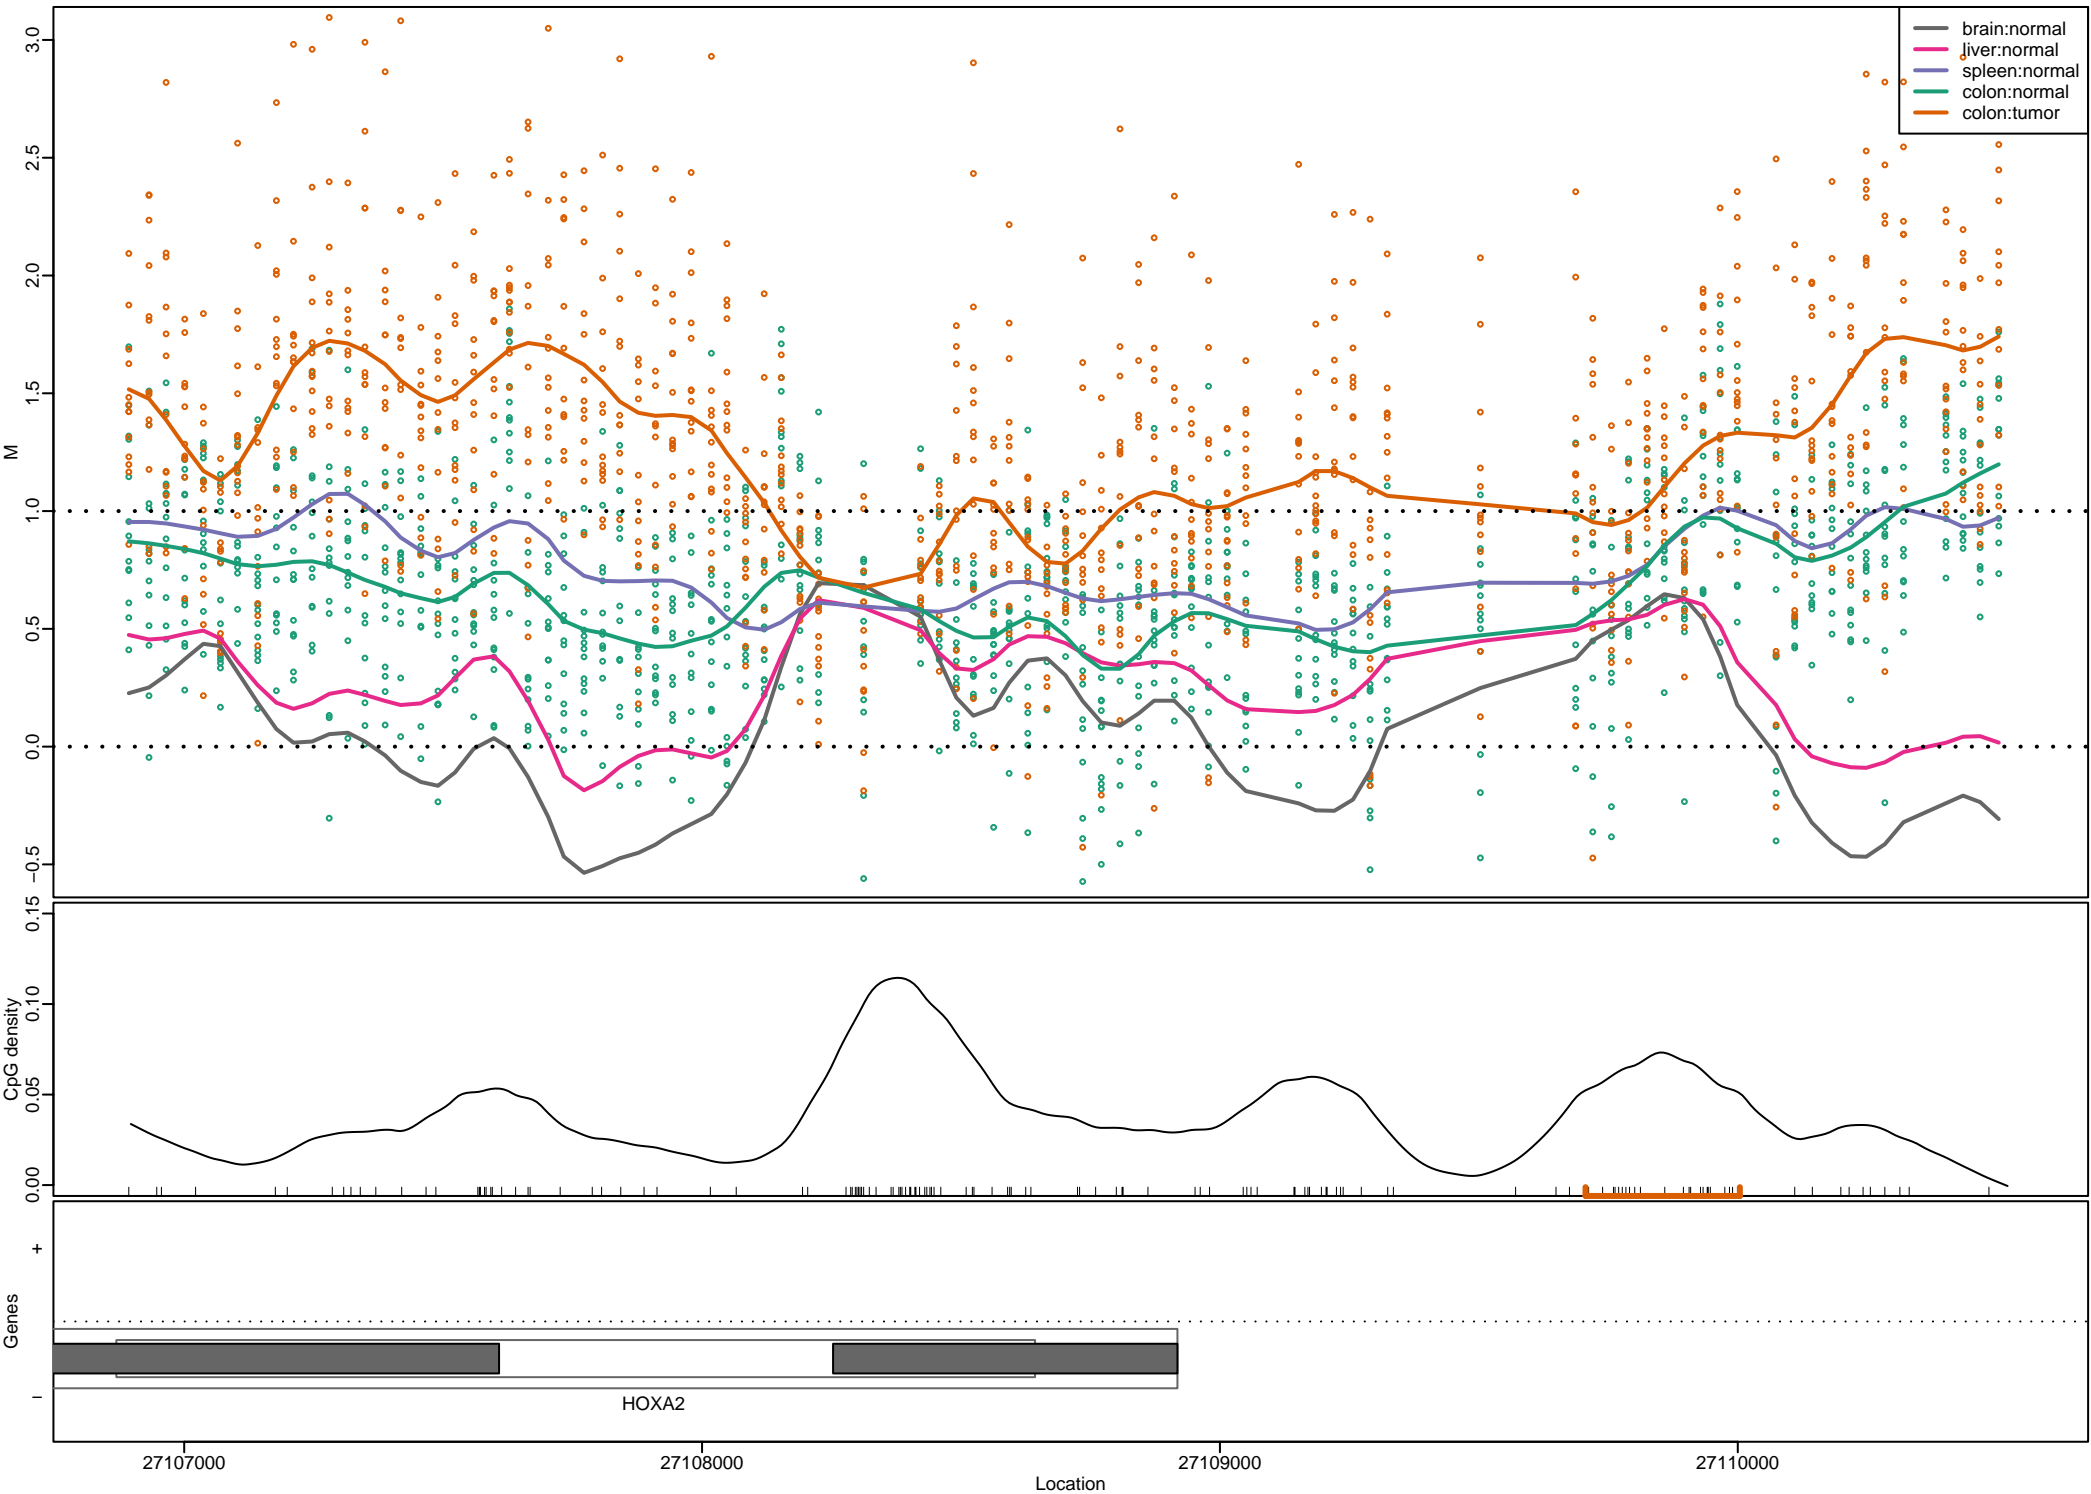

ID:22--chr8:819298-822831

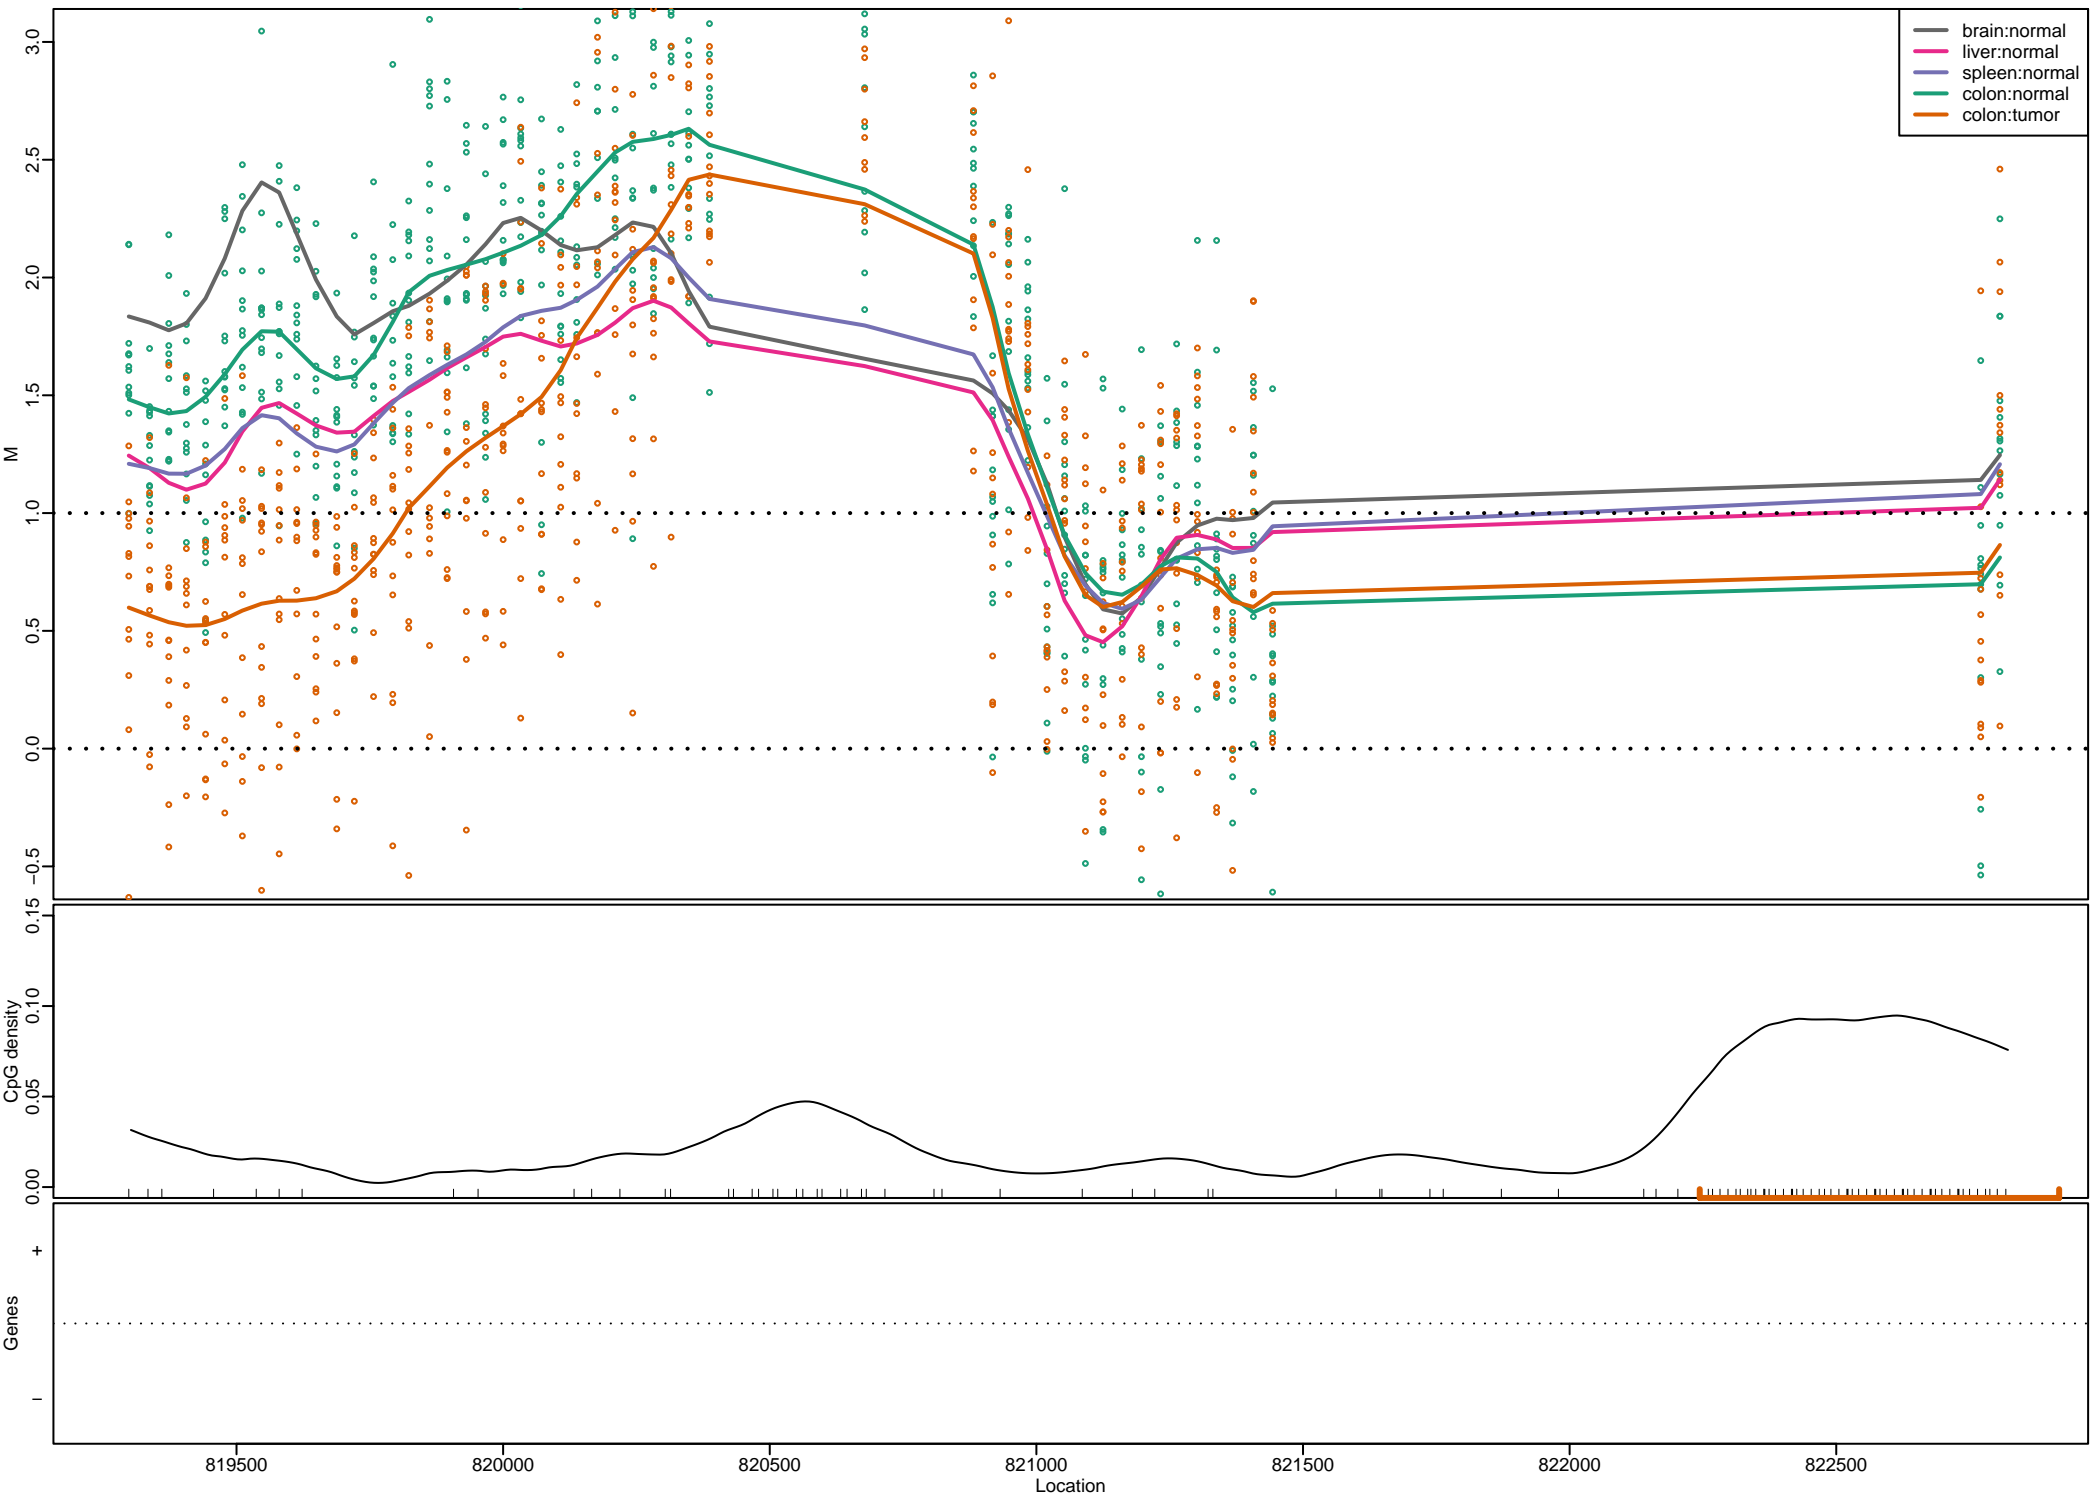

ID:23--chr9:94986734-94992734

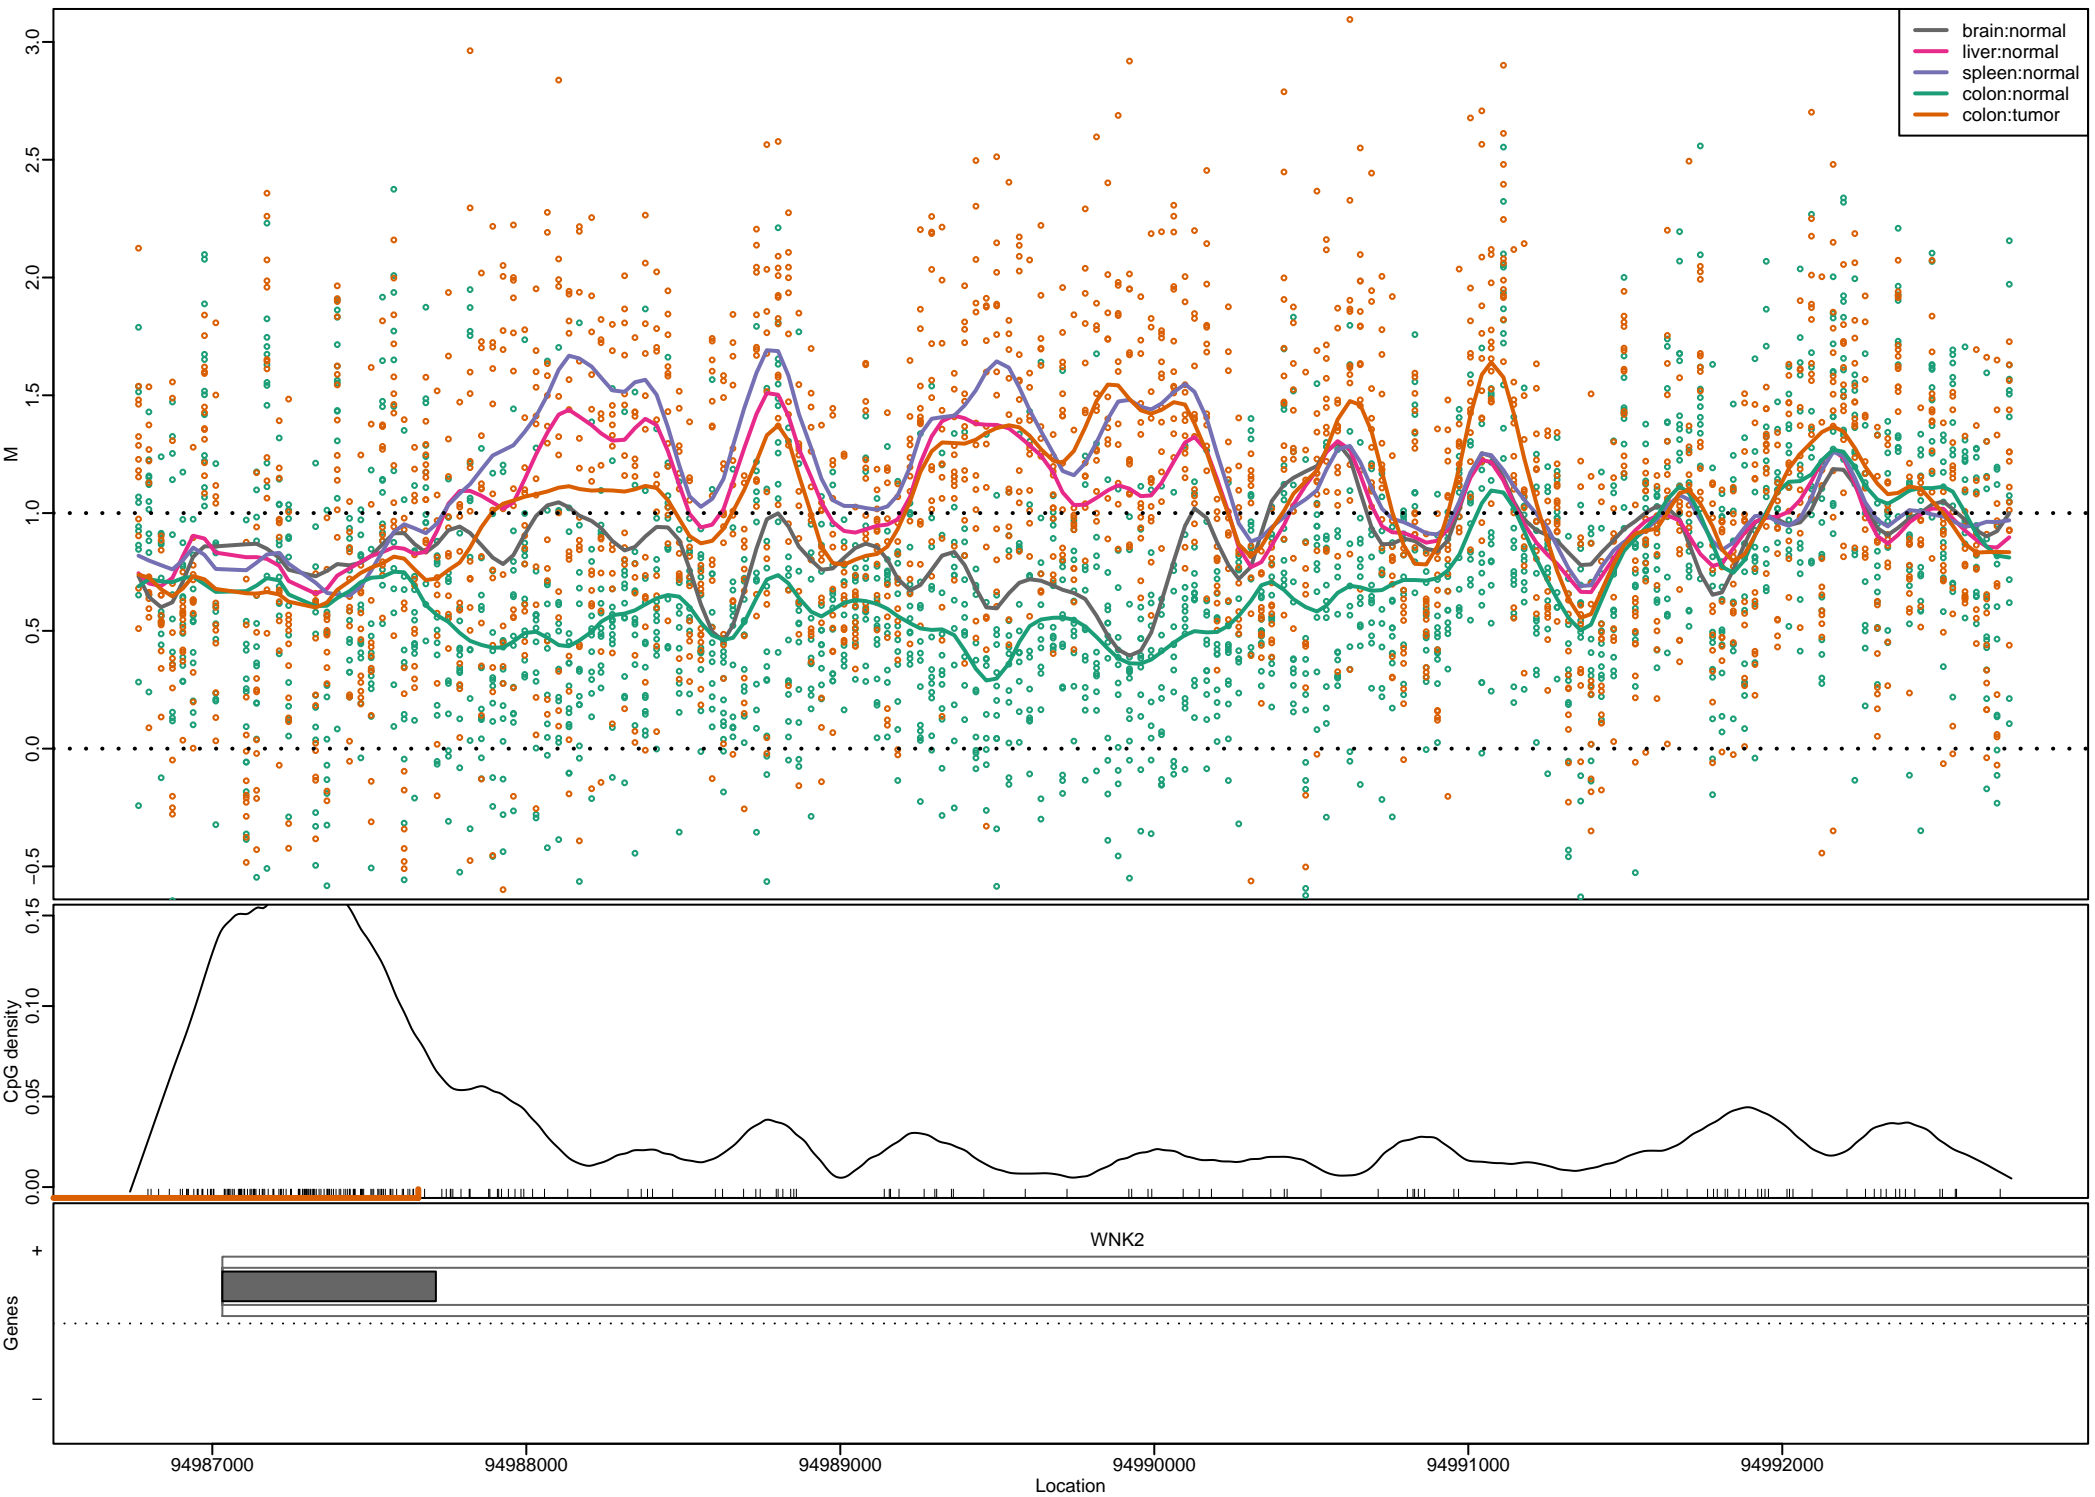



ID:24--chrX:135939448-135944332

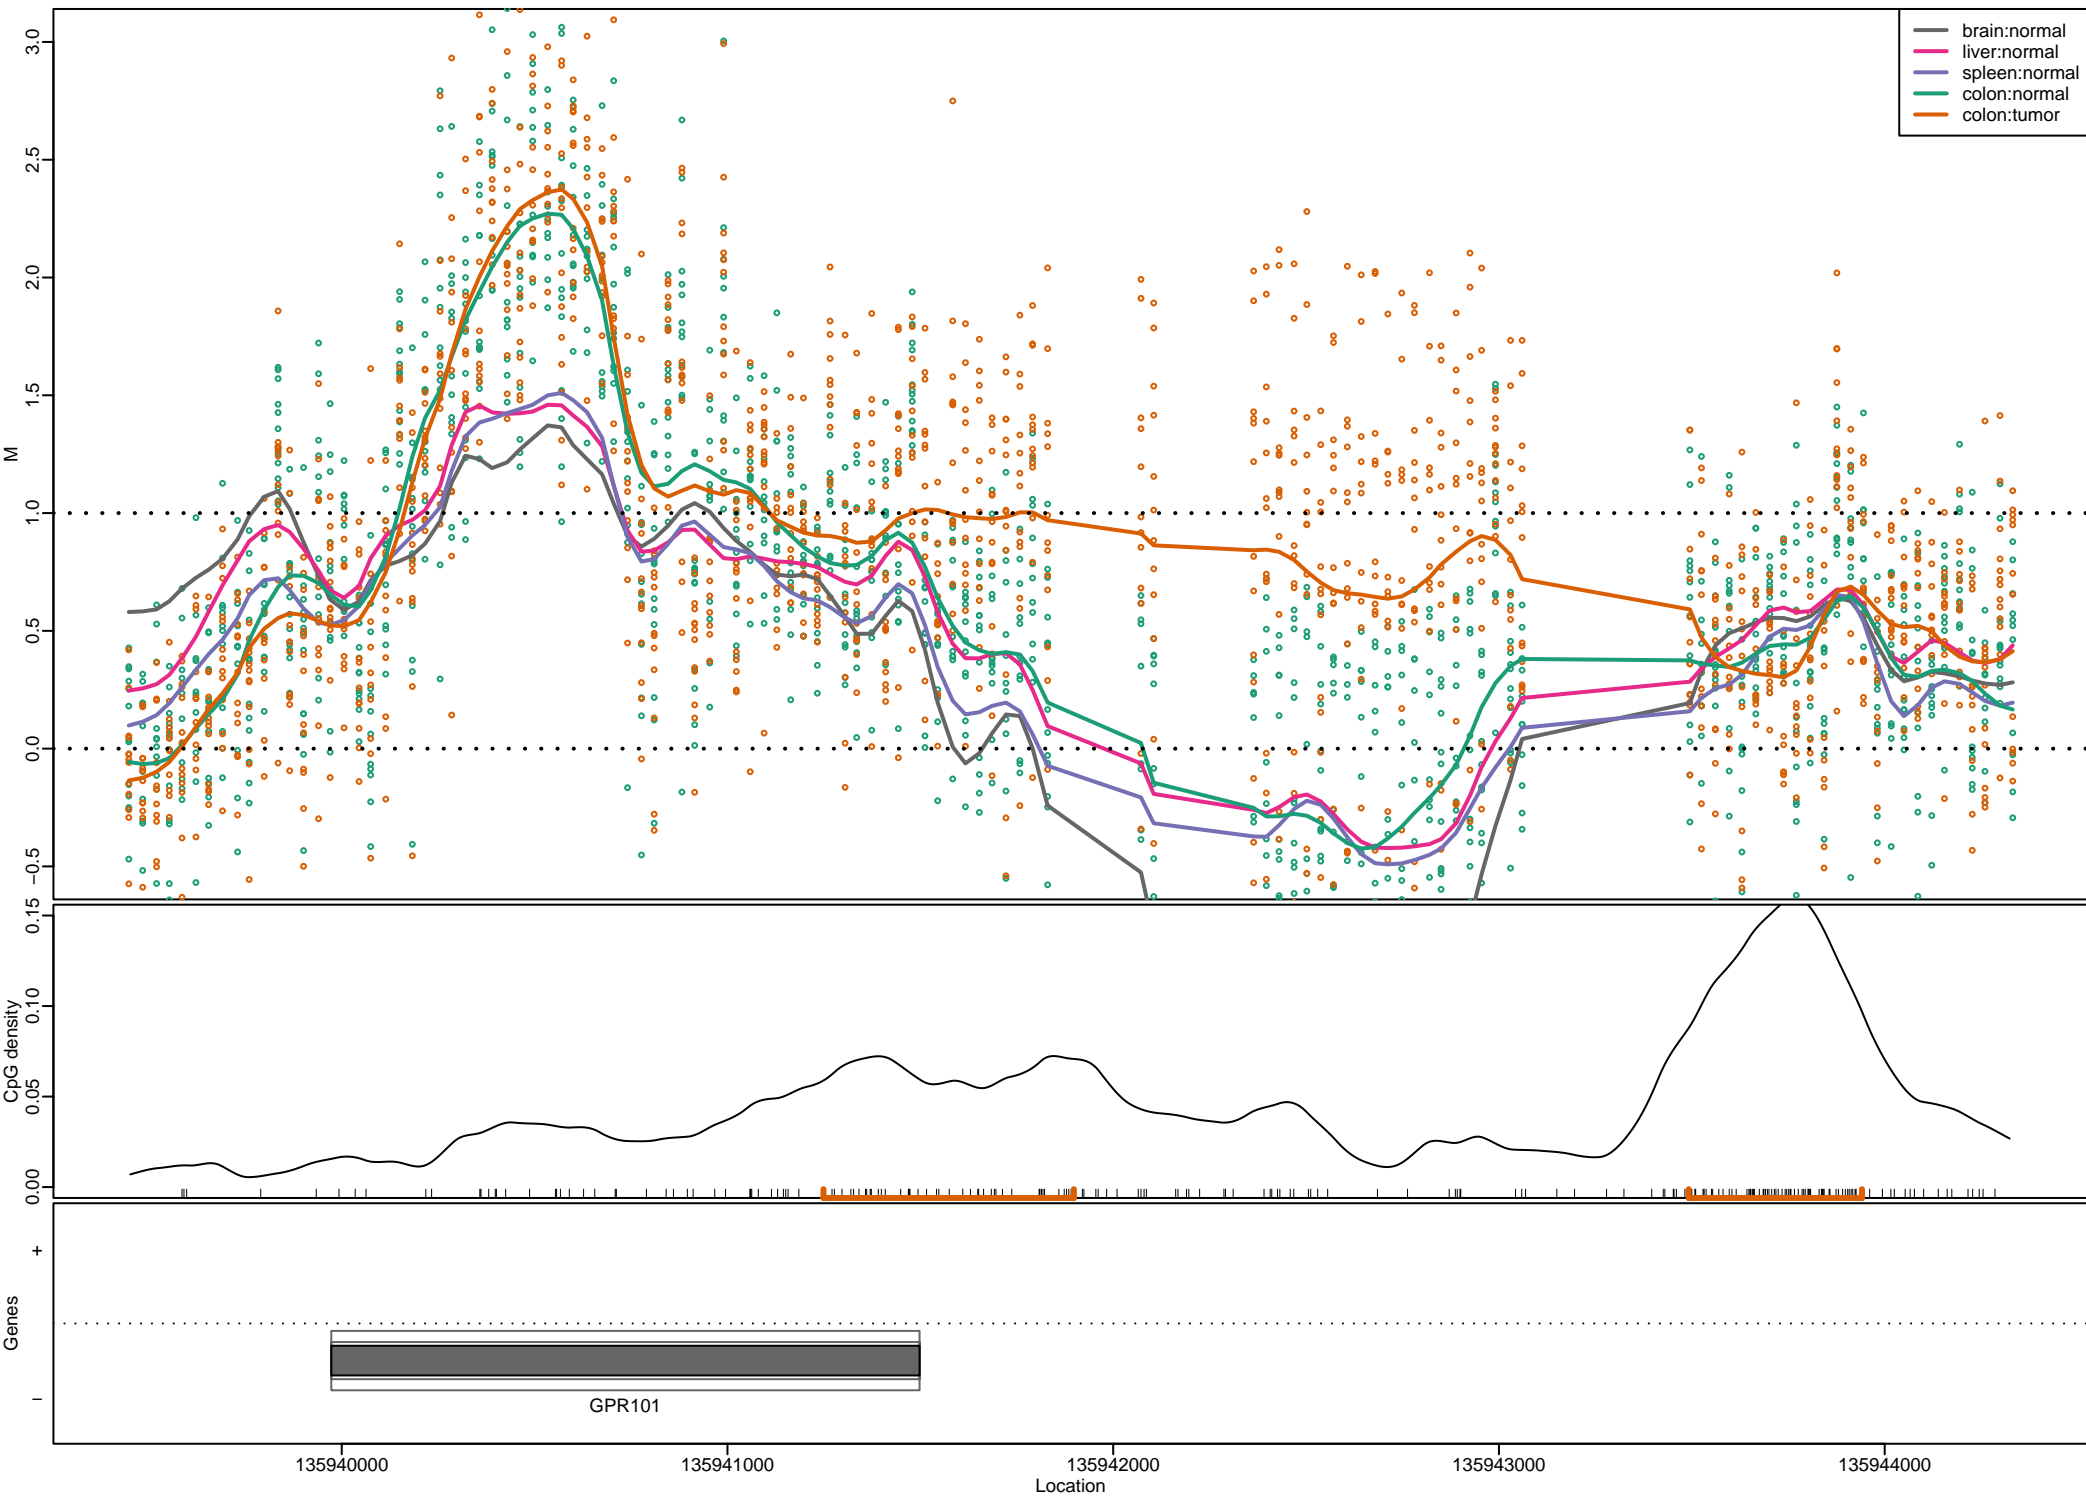

ID:25--chr13:24843121-24845494

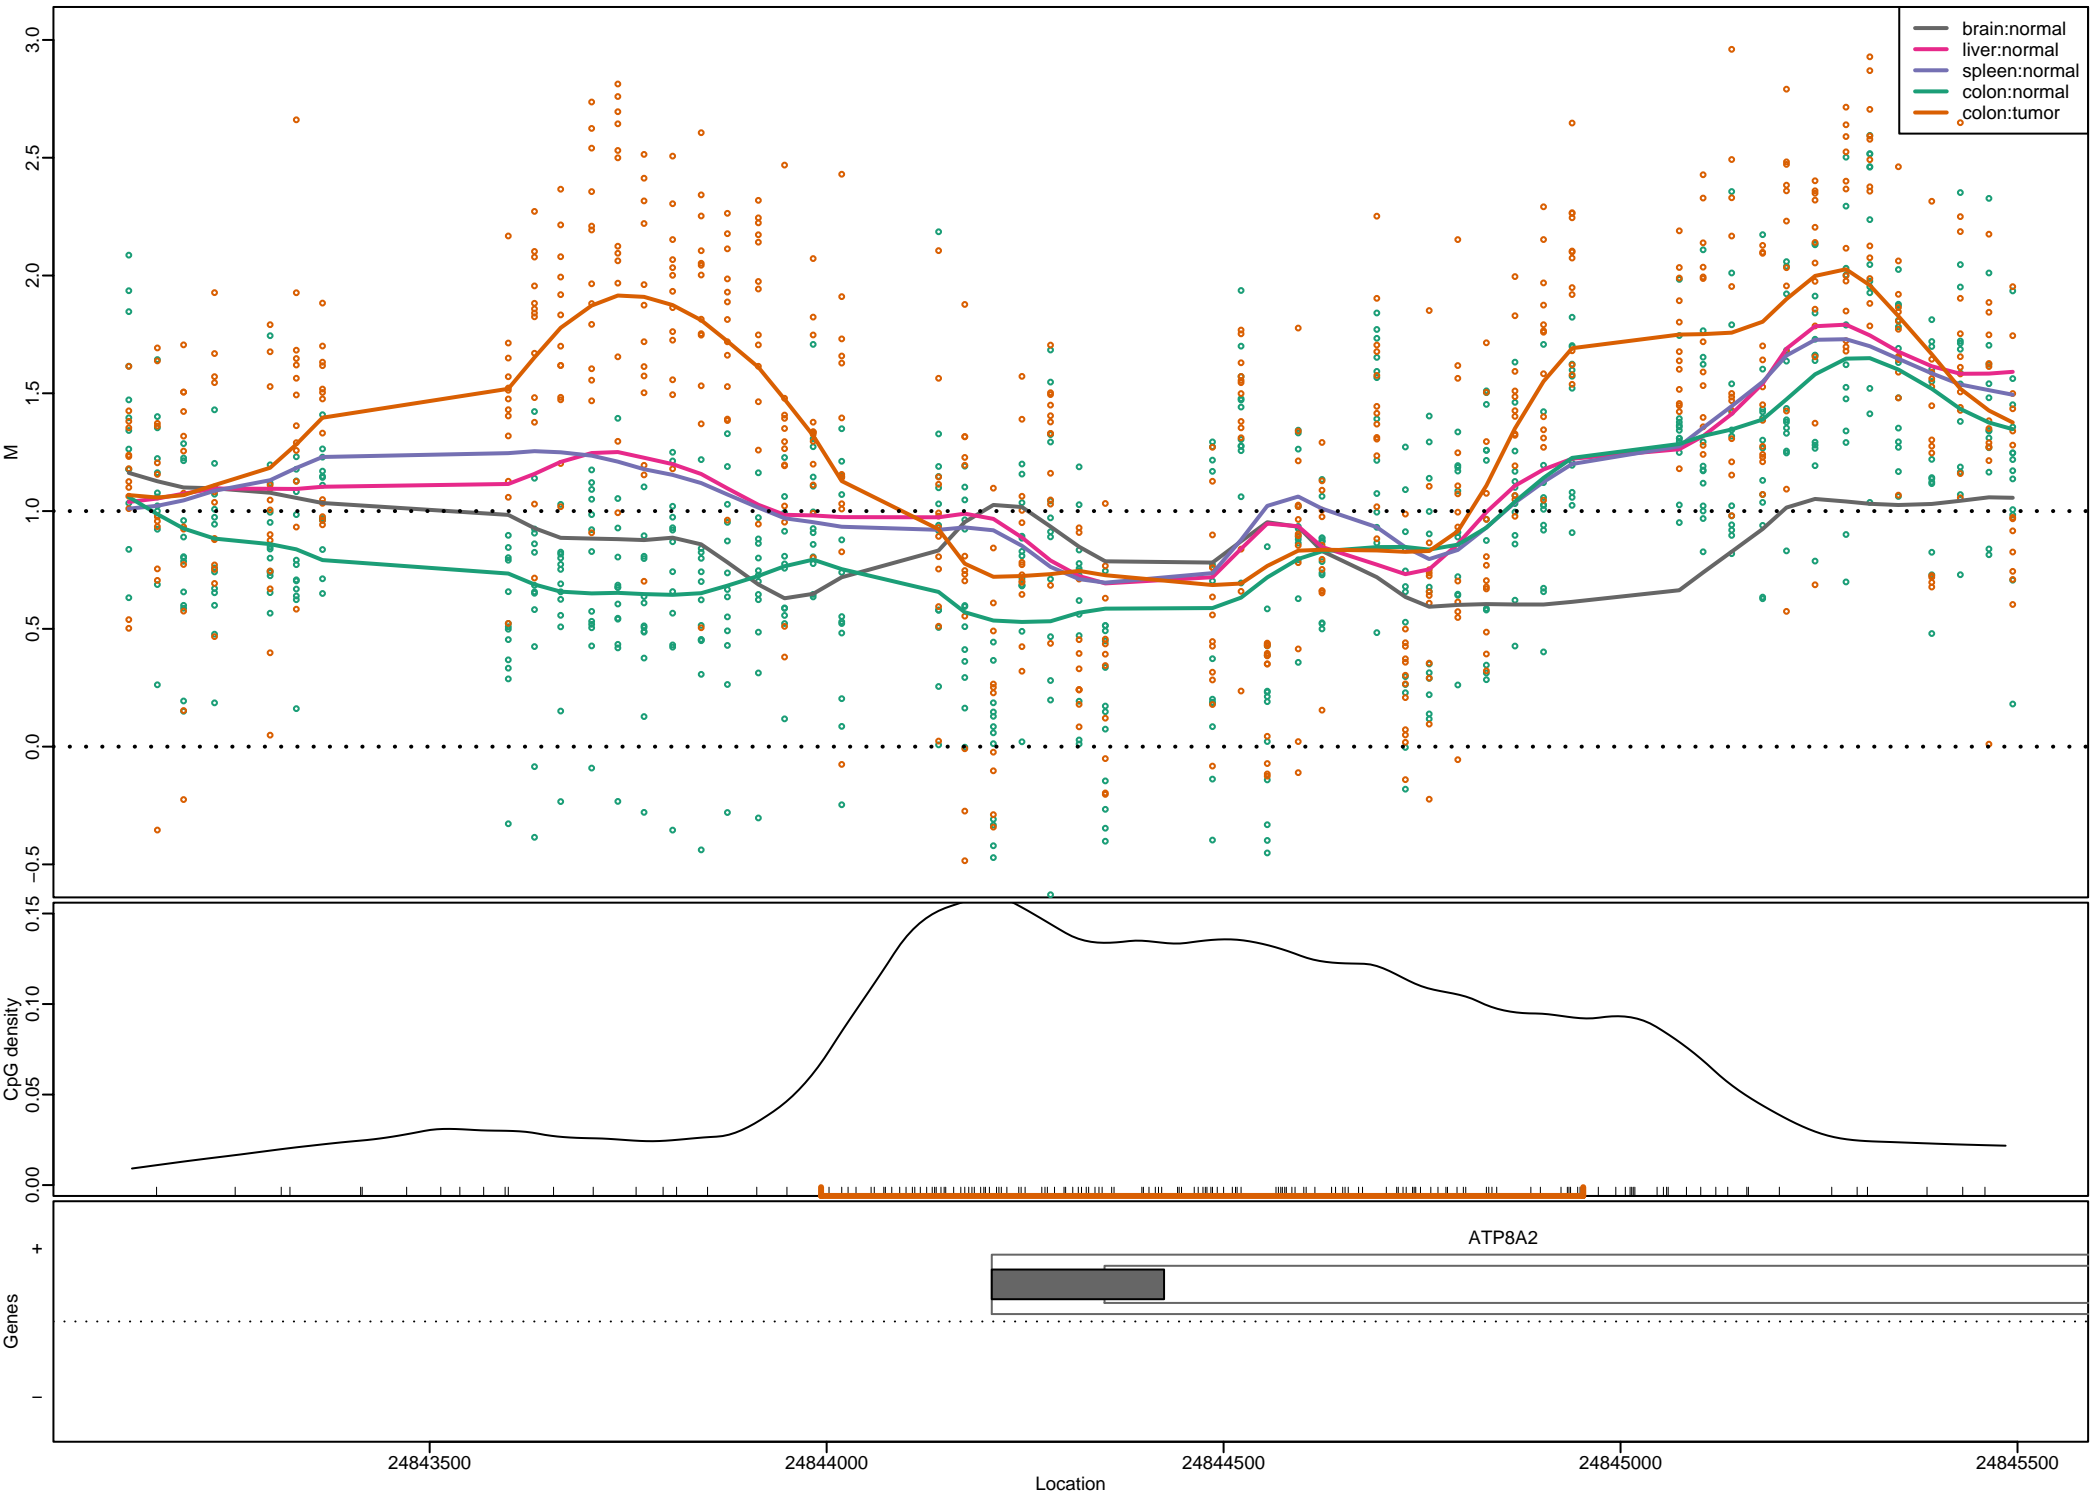

ID:26--chr8:144541046-144545128

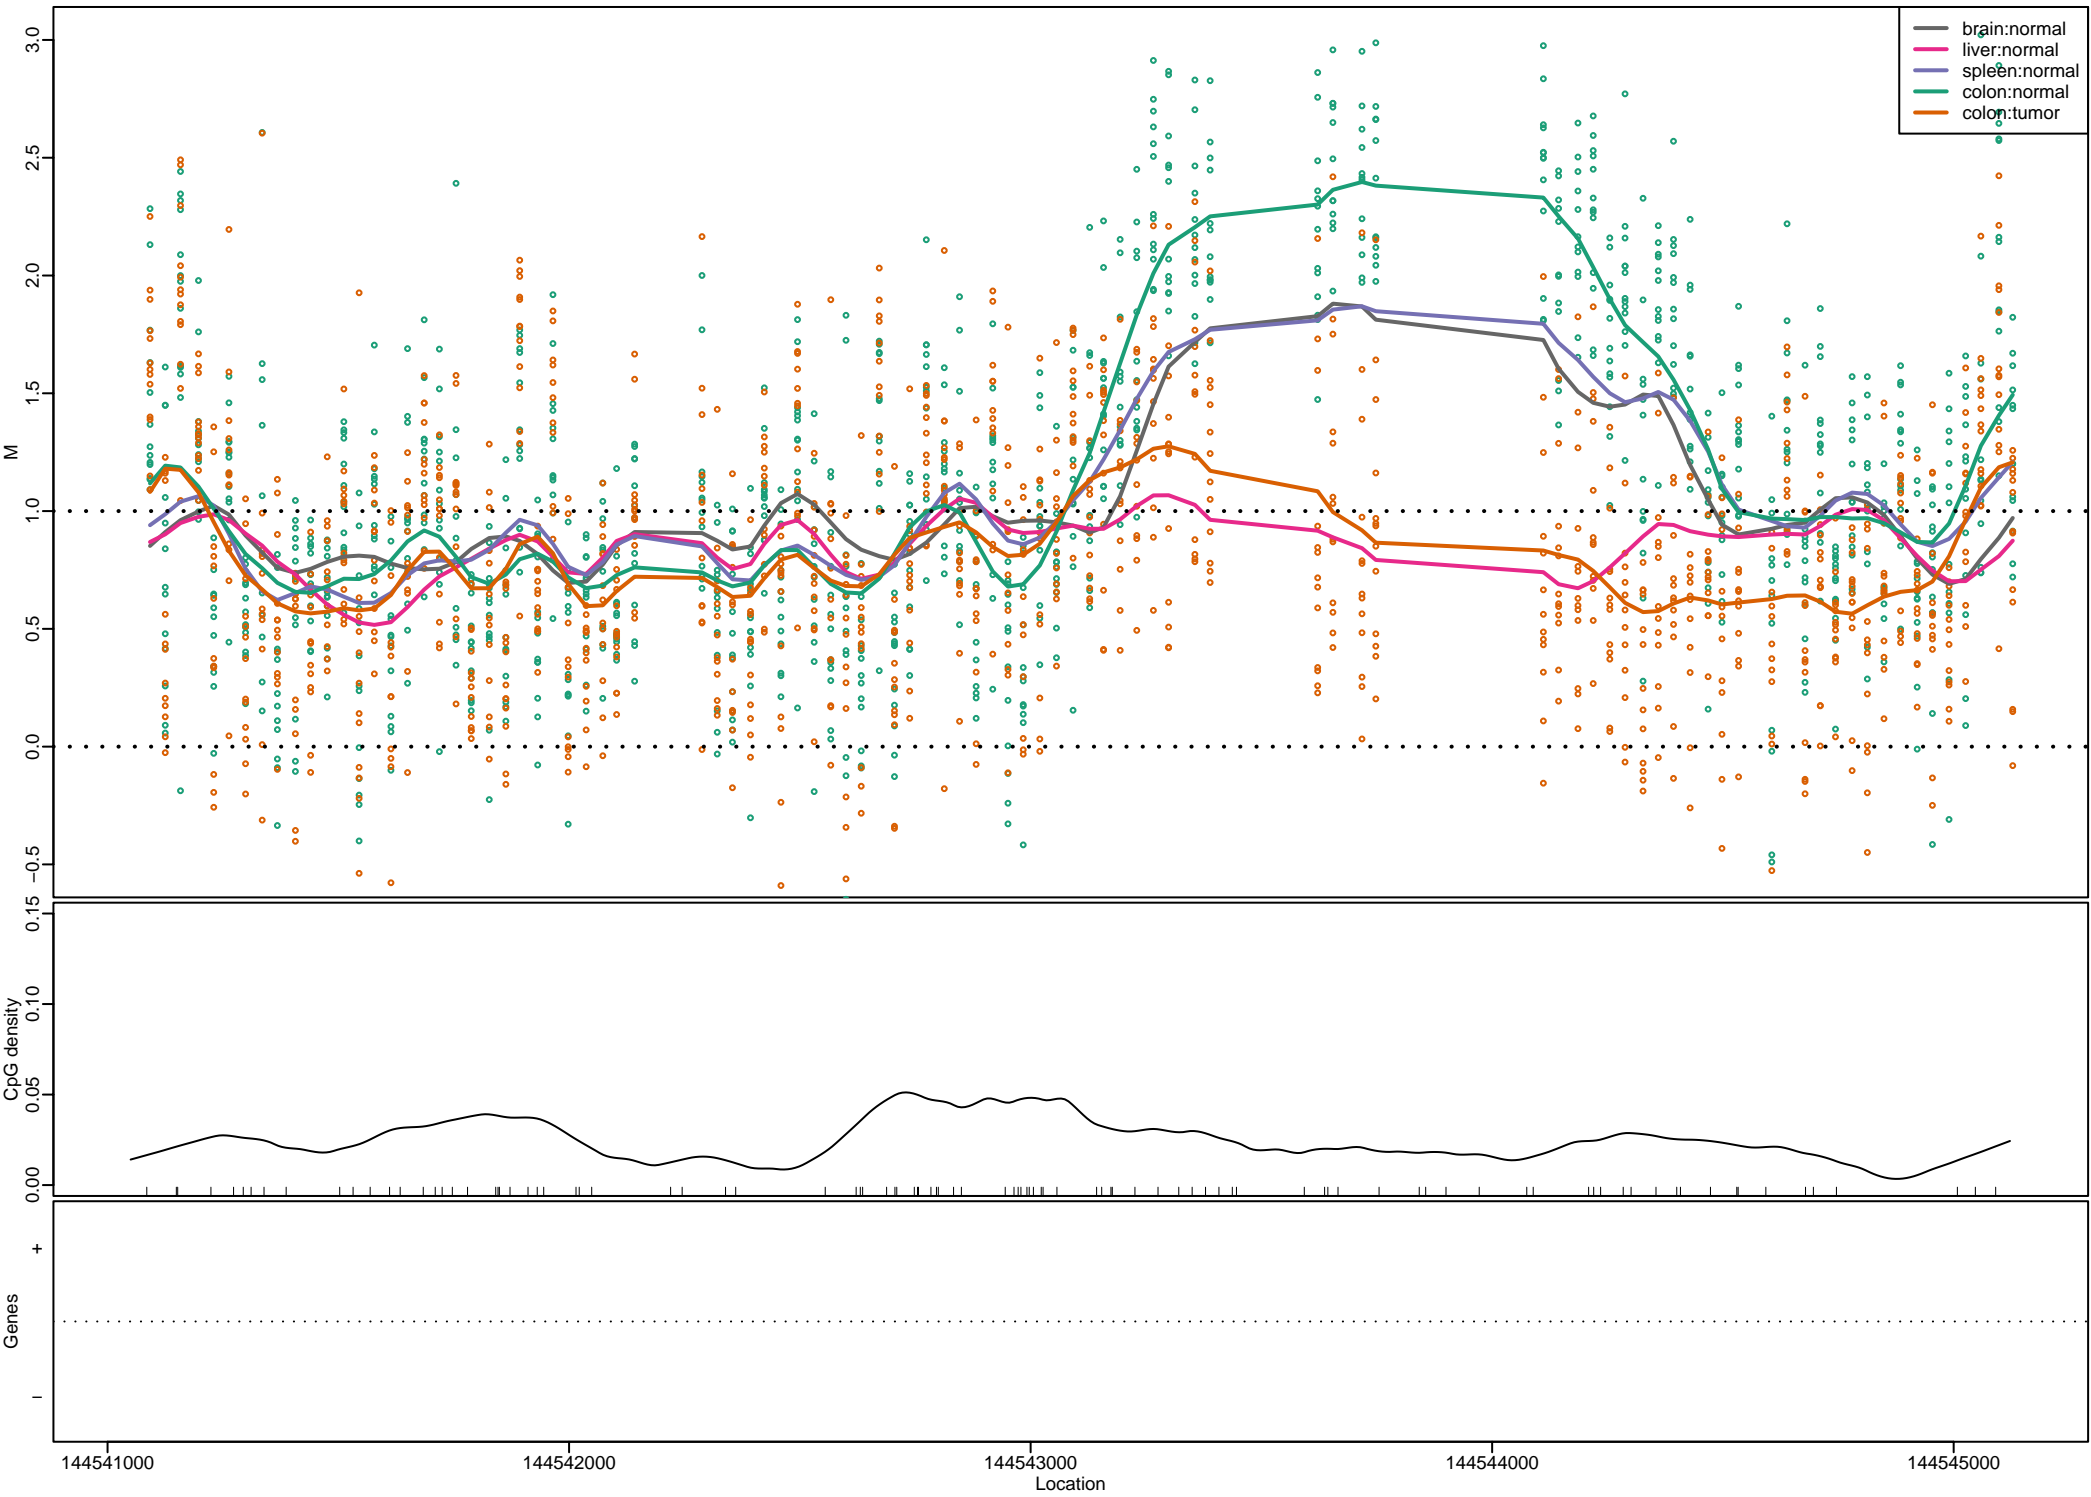

ID:27--chr20:15408248-15408881

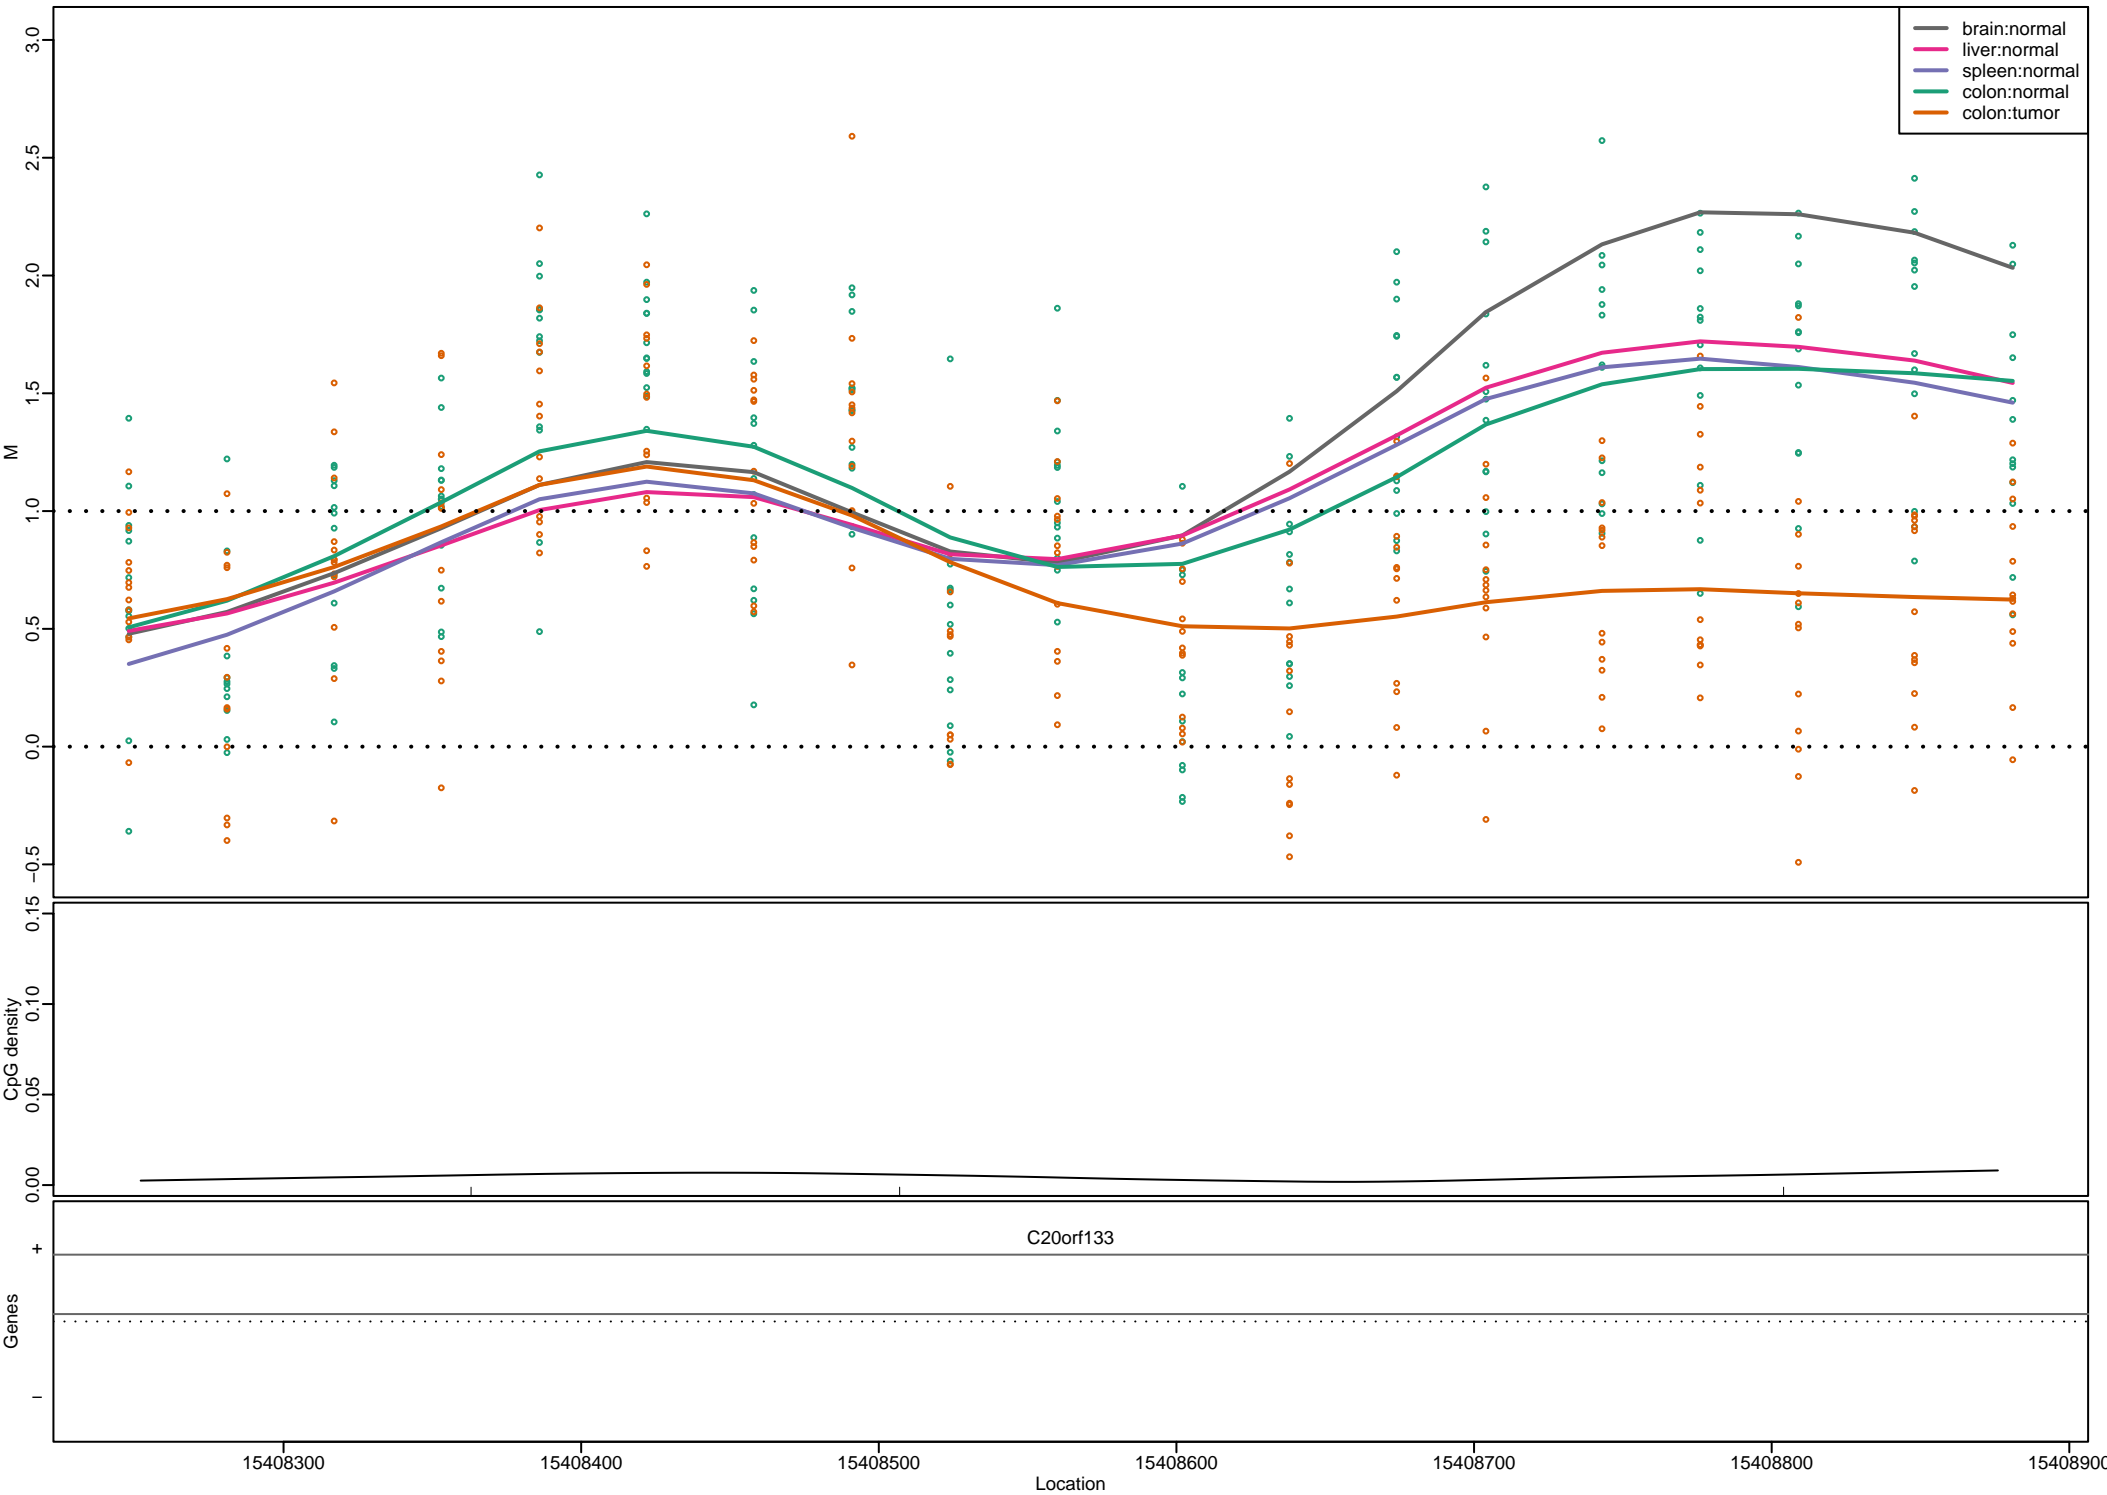

ID:28--chr19:43434536-43439159

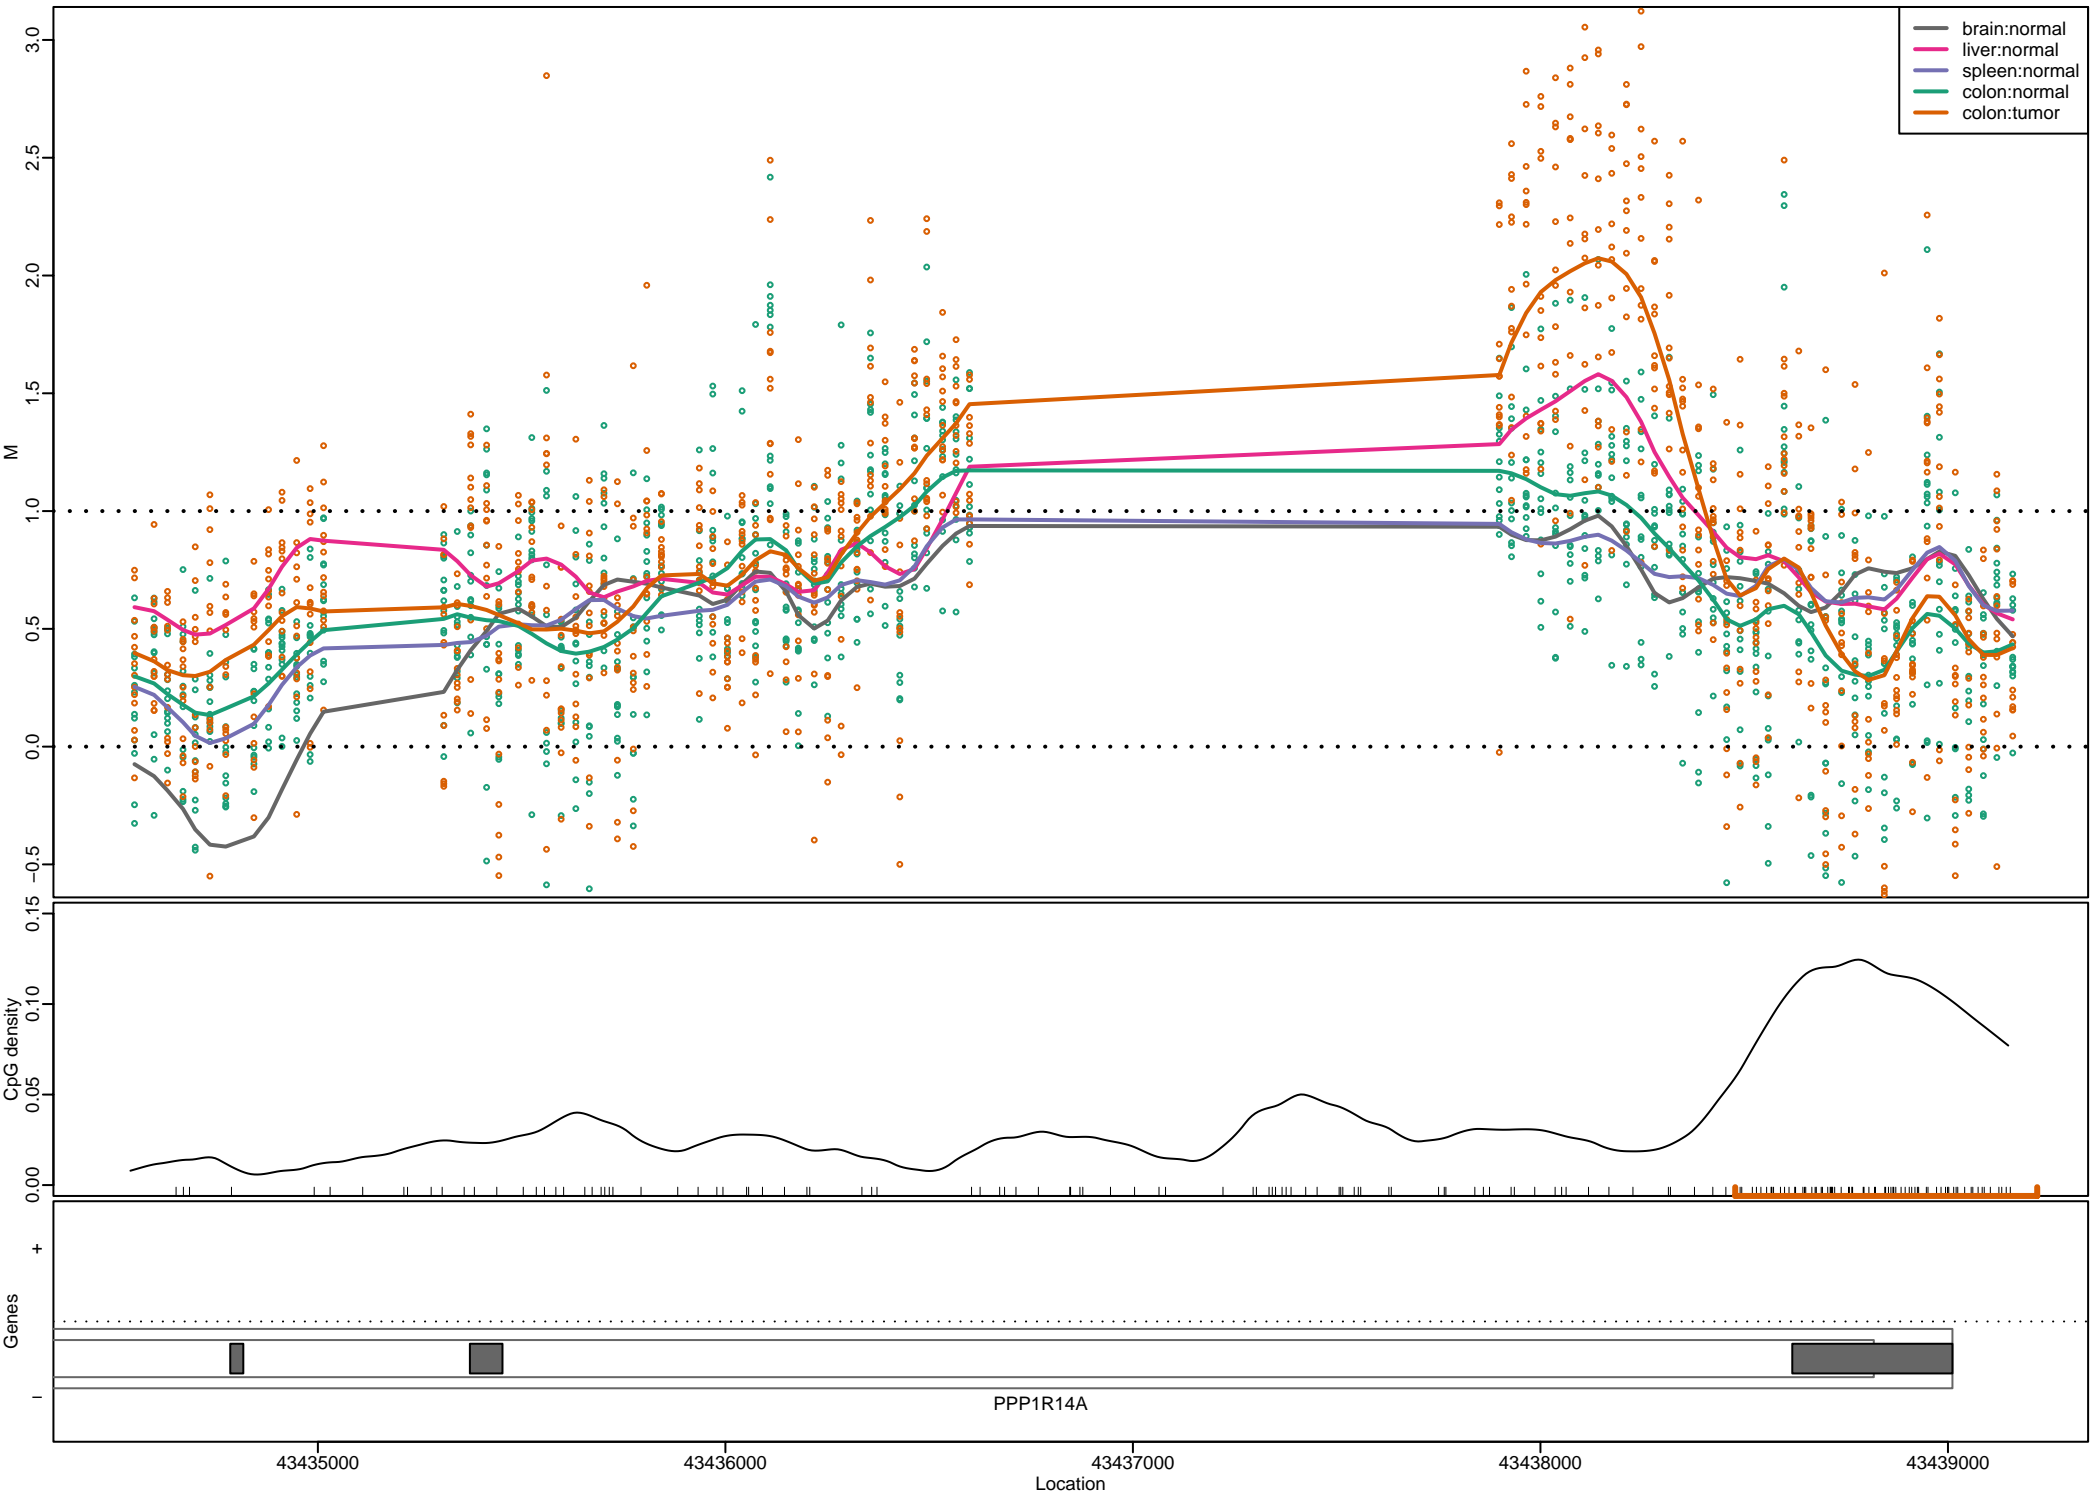

ID:29--chr7:27120790-27123086

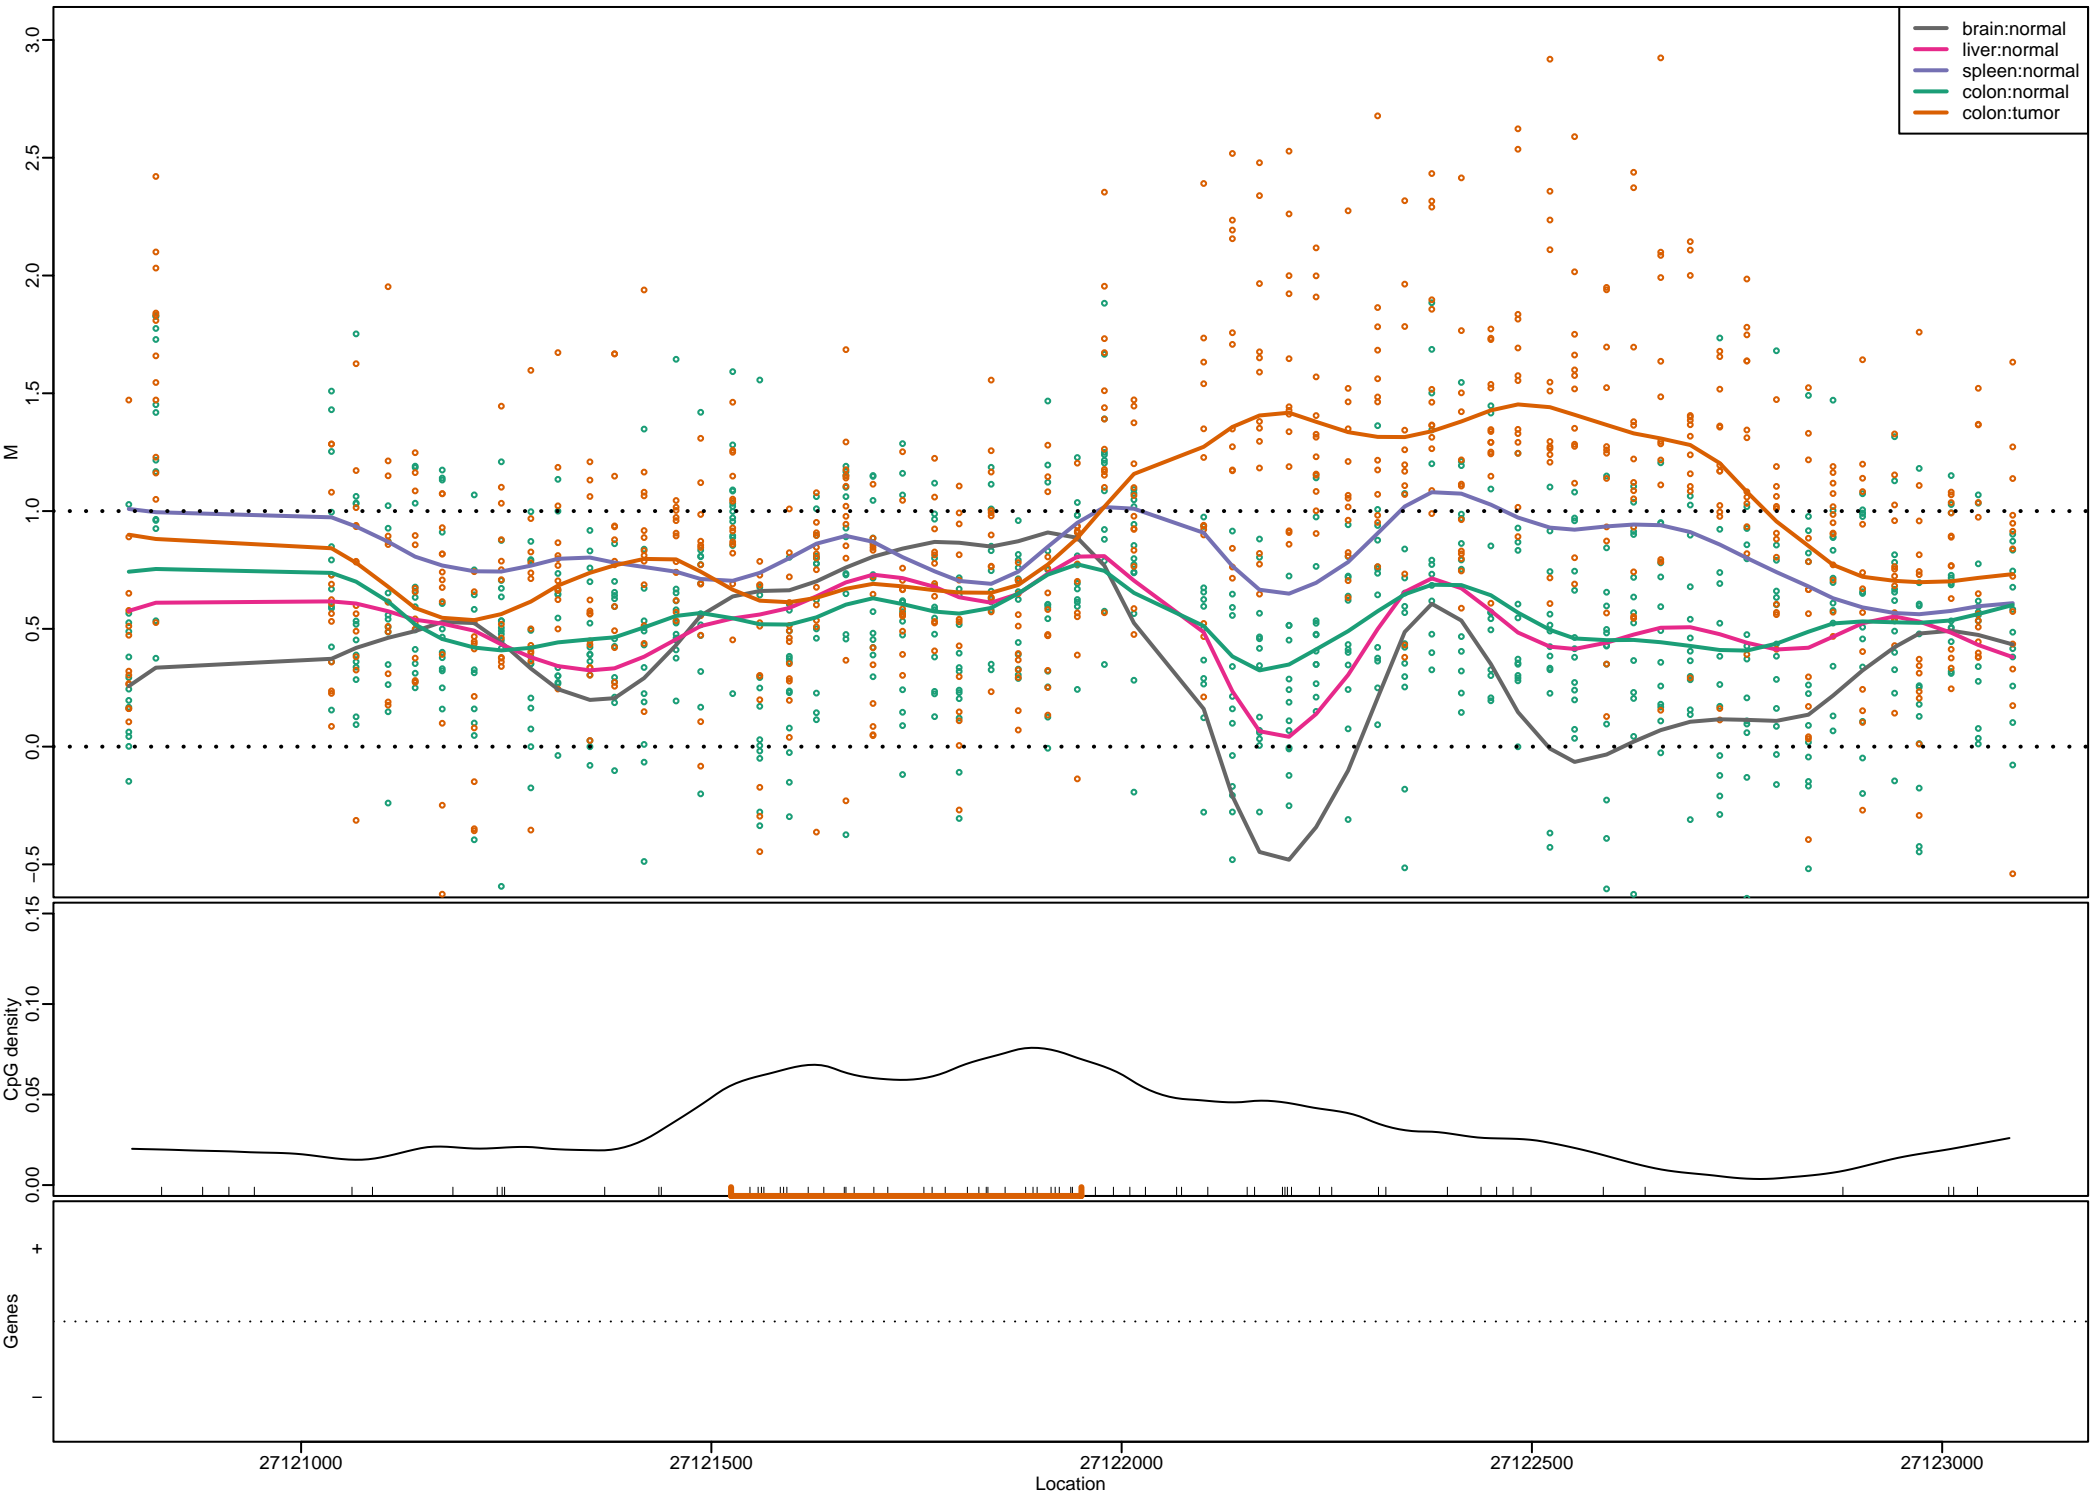

ID:30--chr10:129973472-129976900

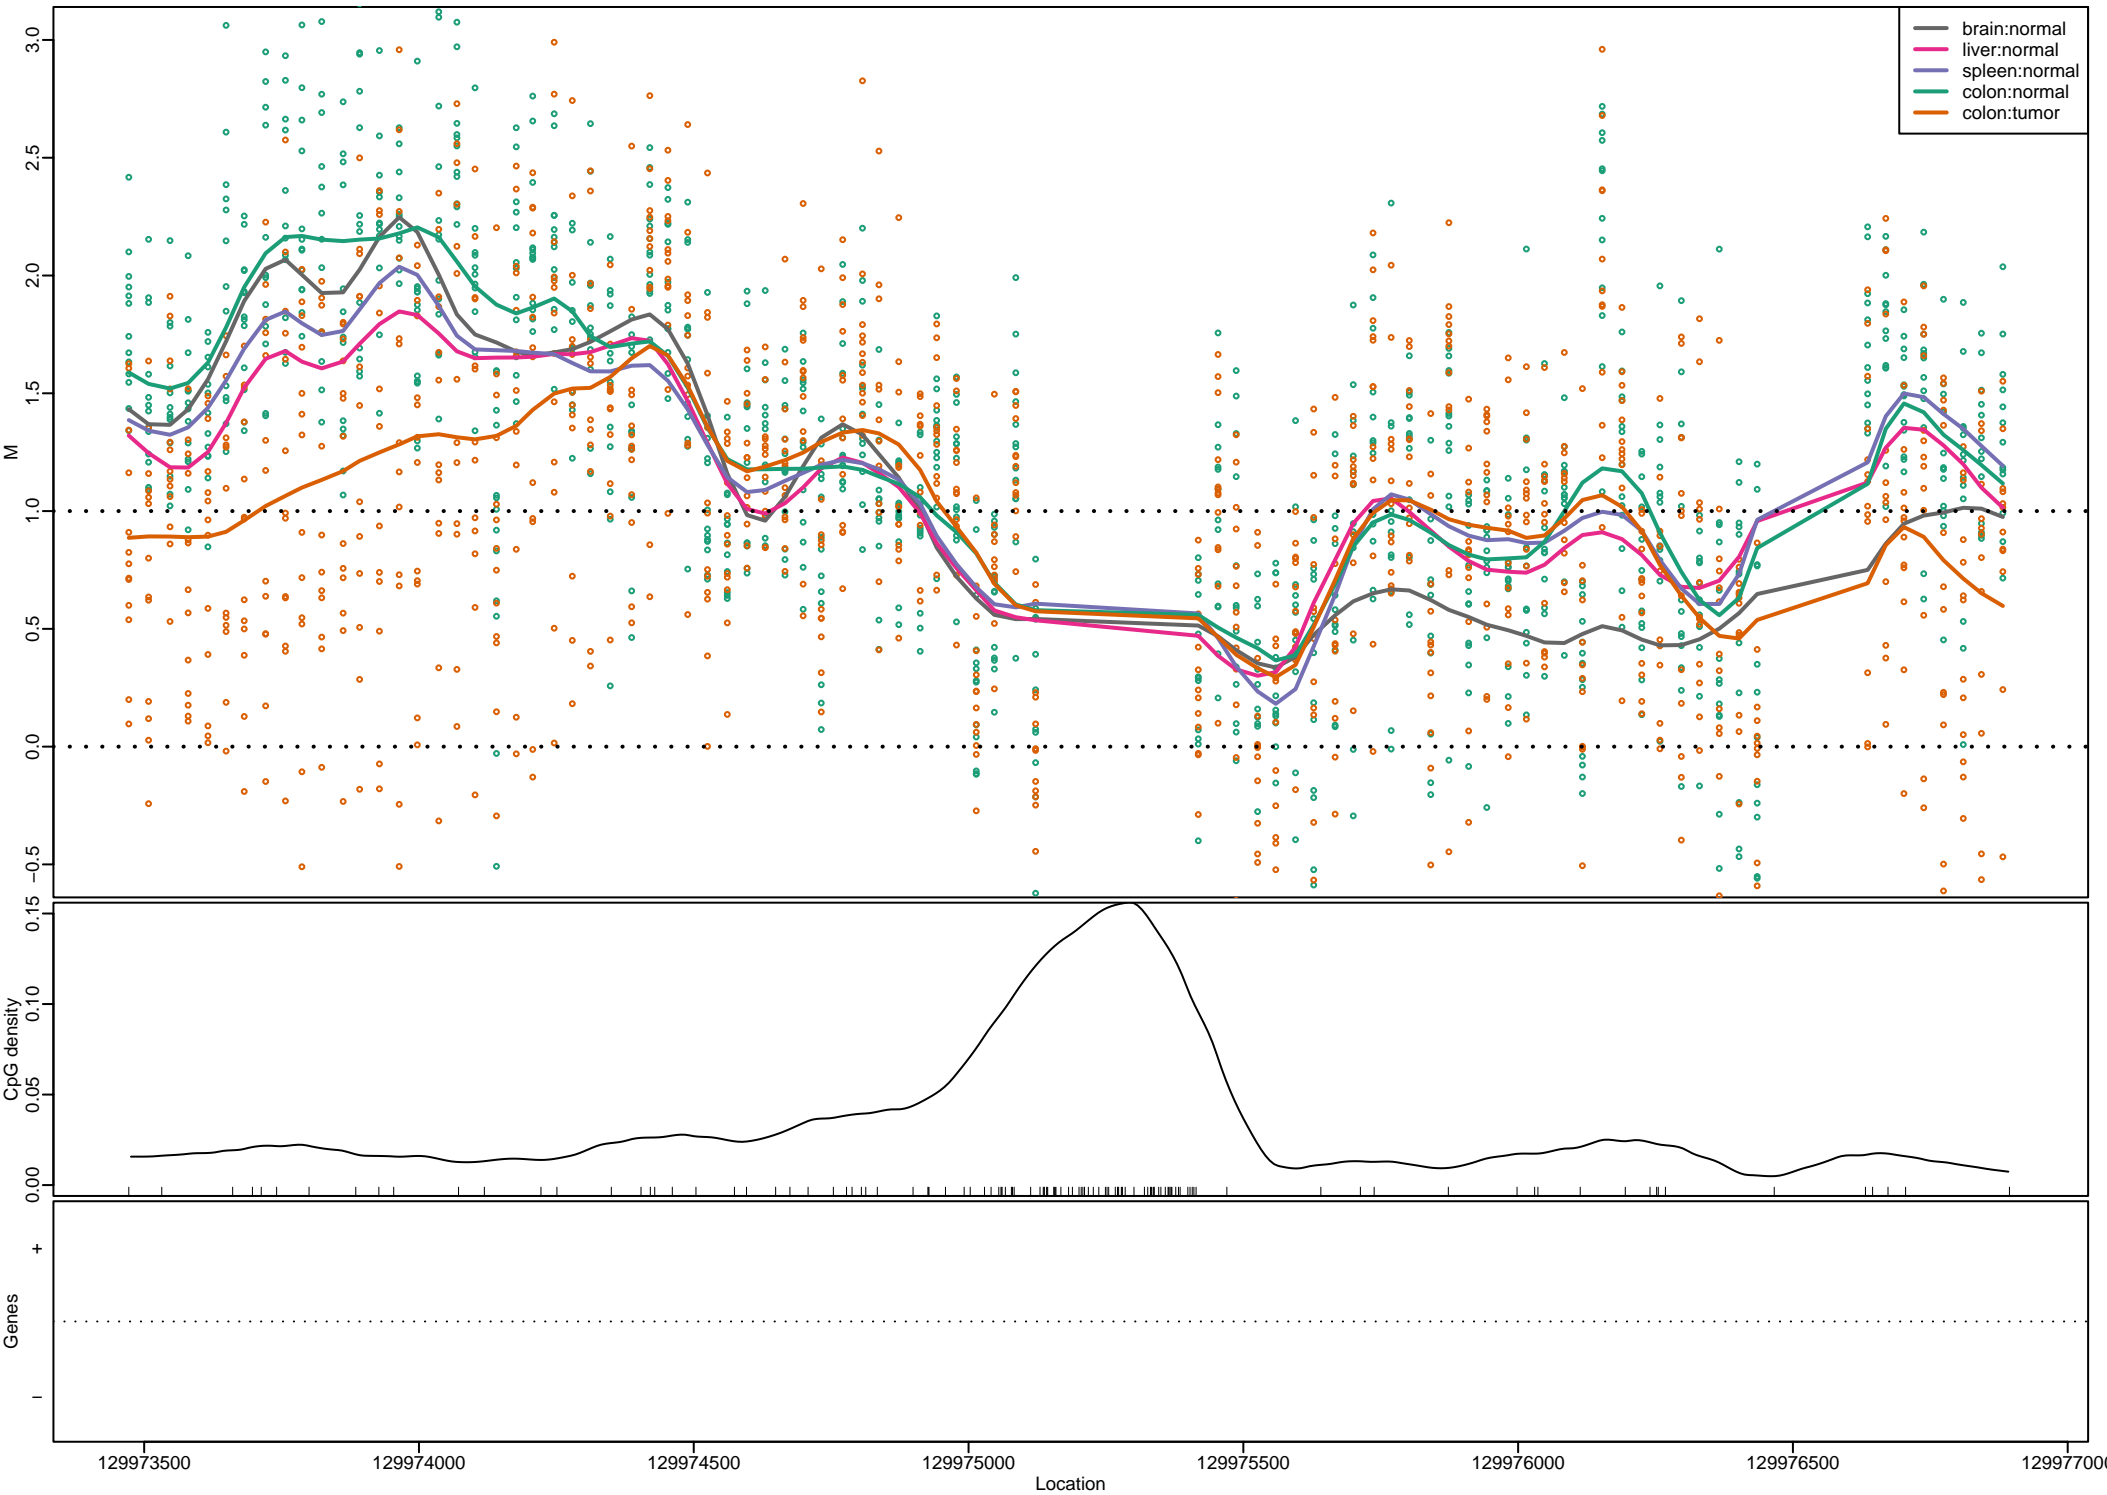

ID:31--chr7:129912706-129914137

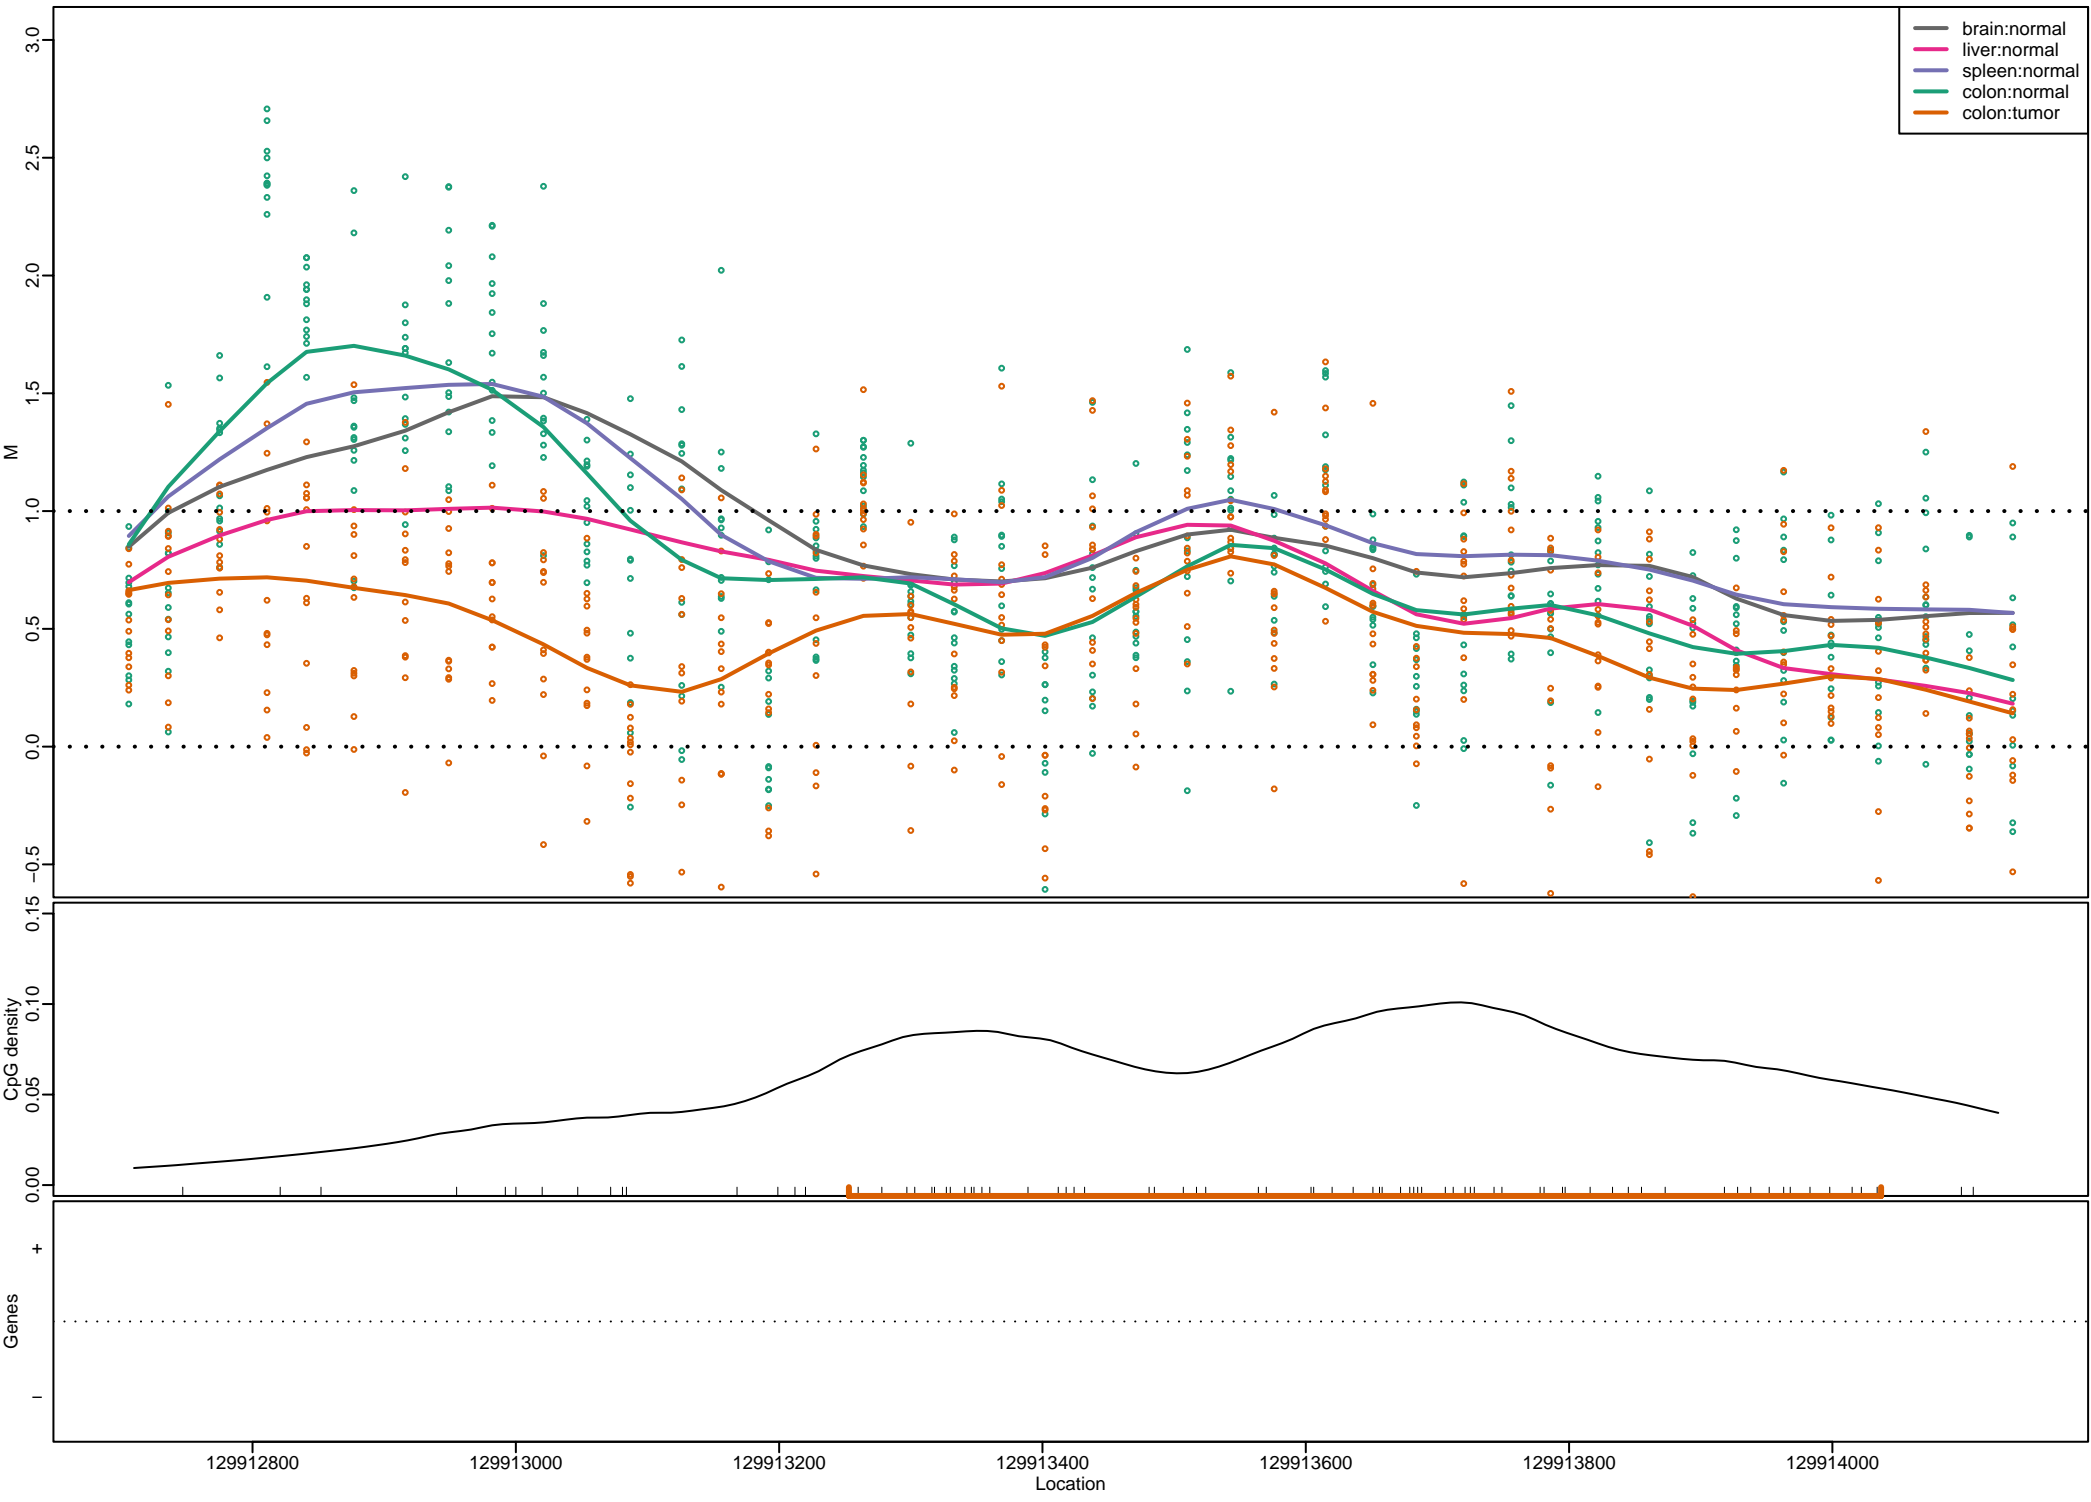



ID:32--chr15:90735153-90738565

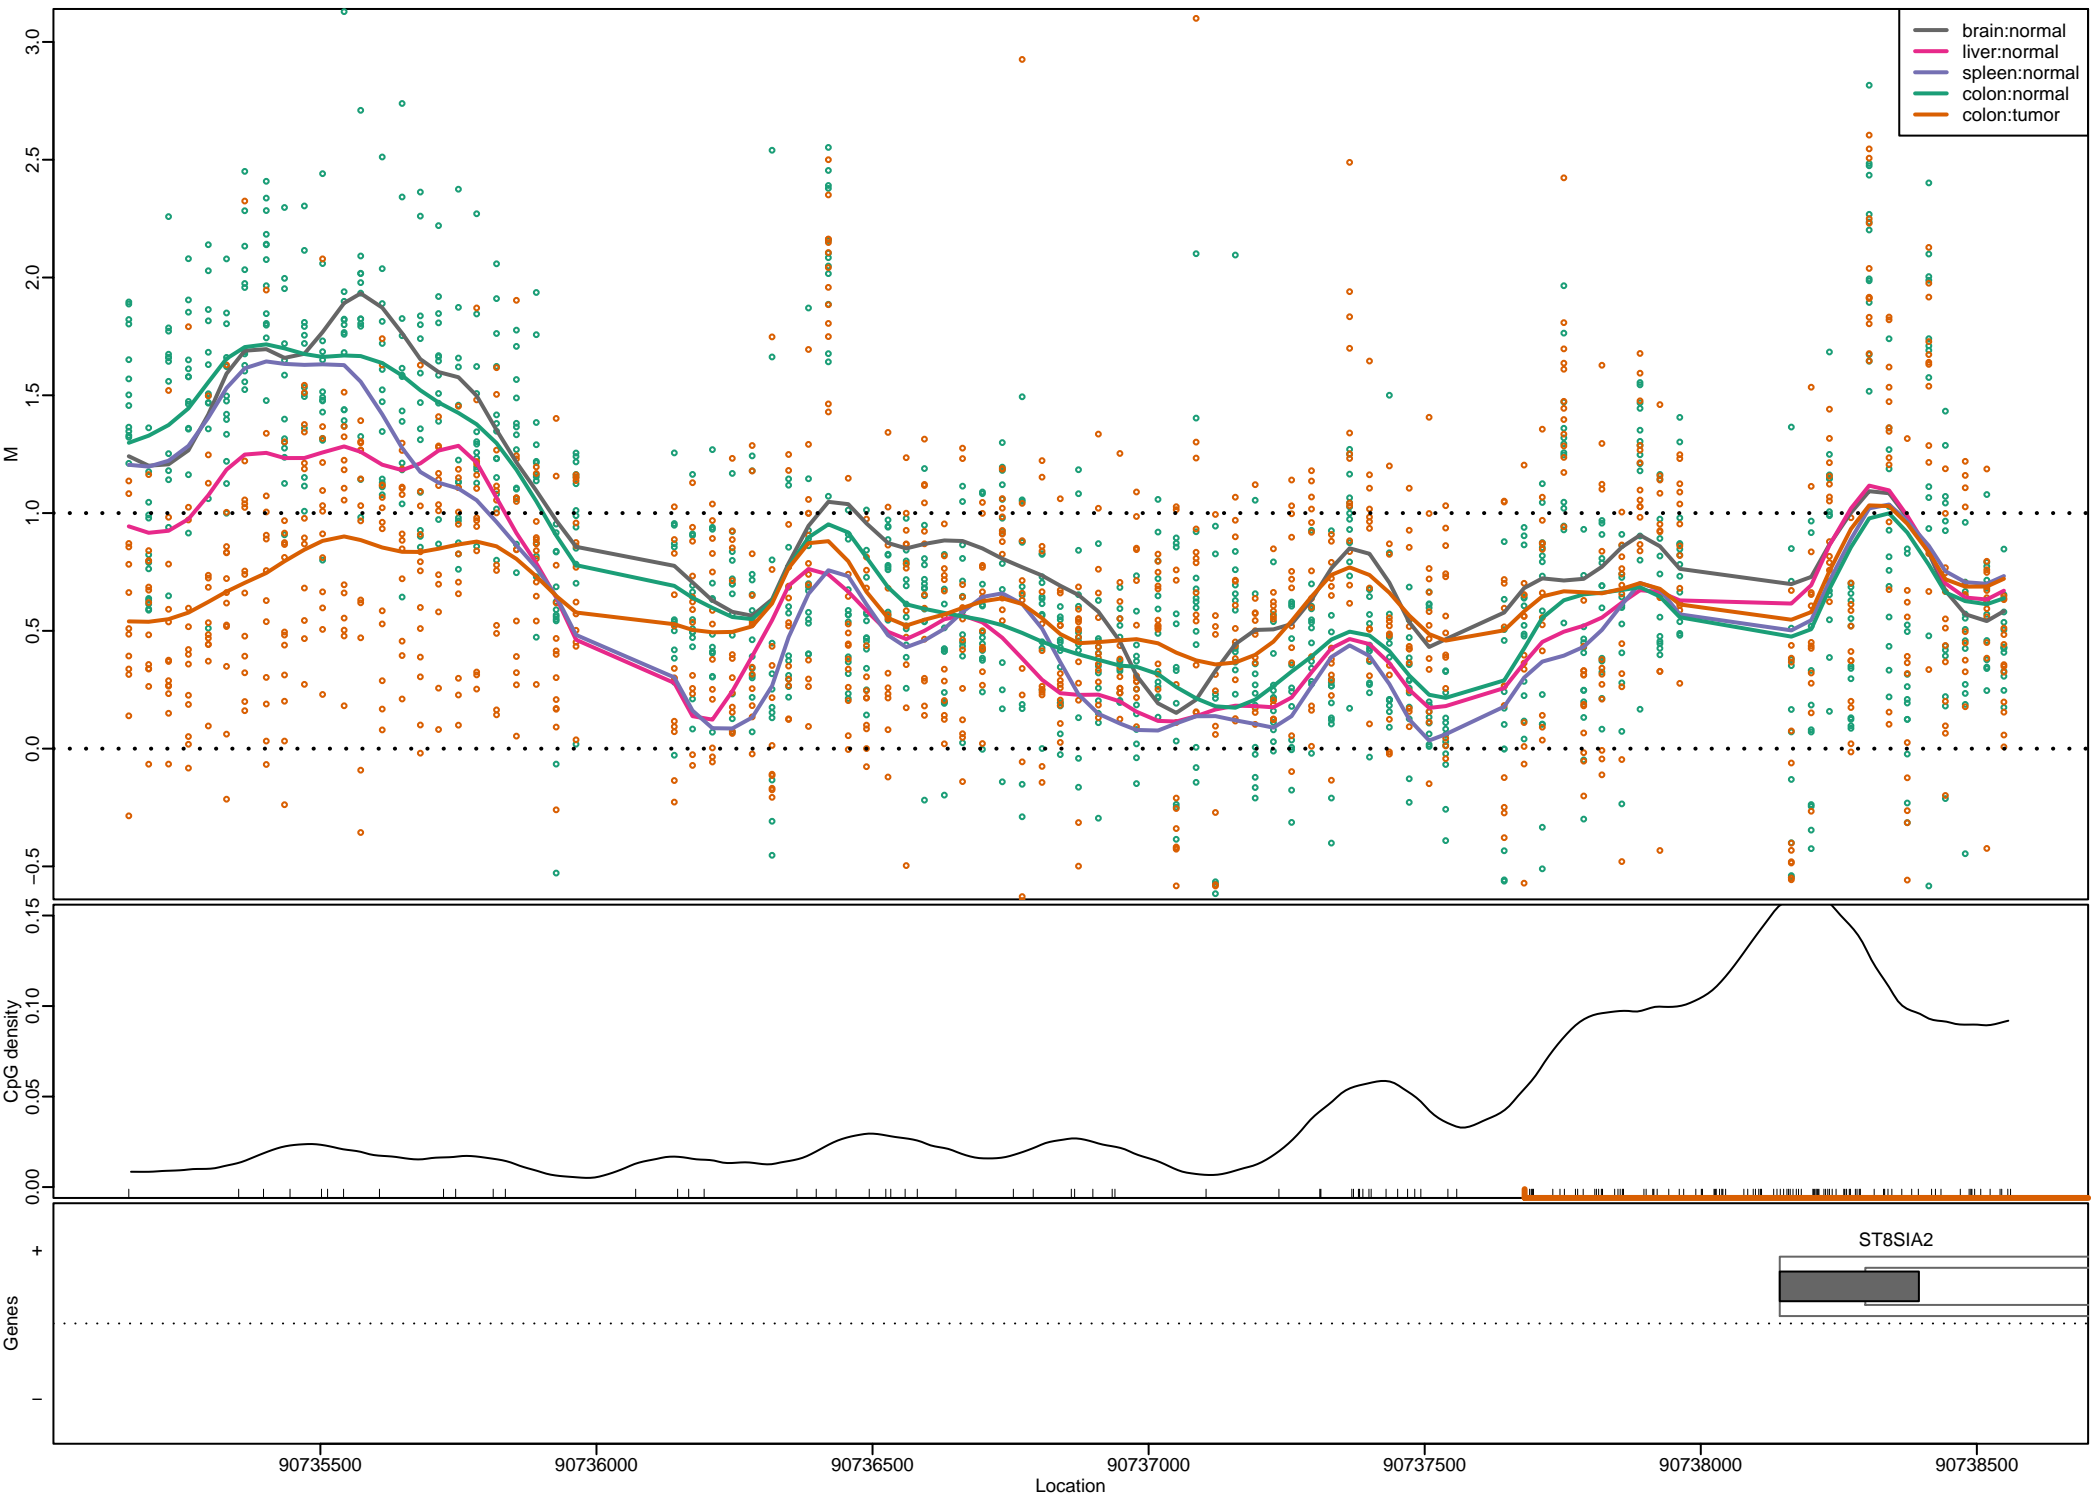

ID:33--chr22:36142417-36148417

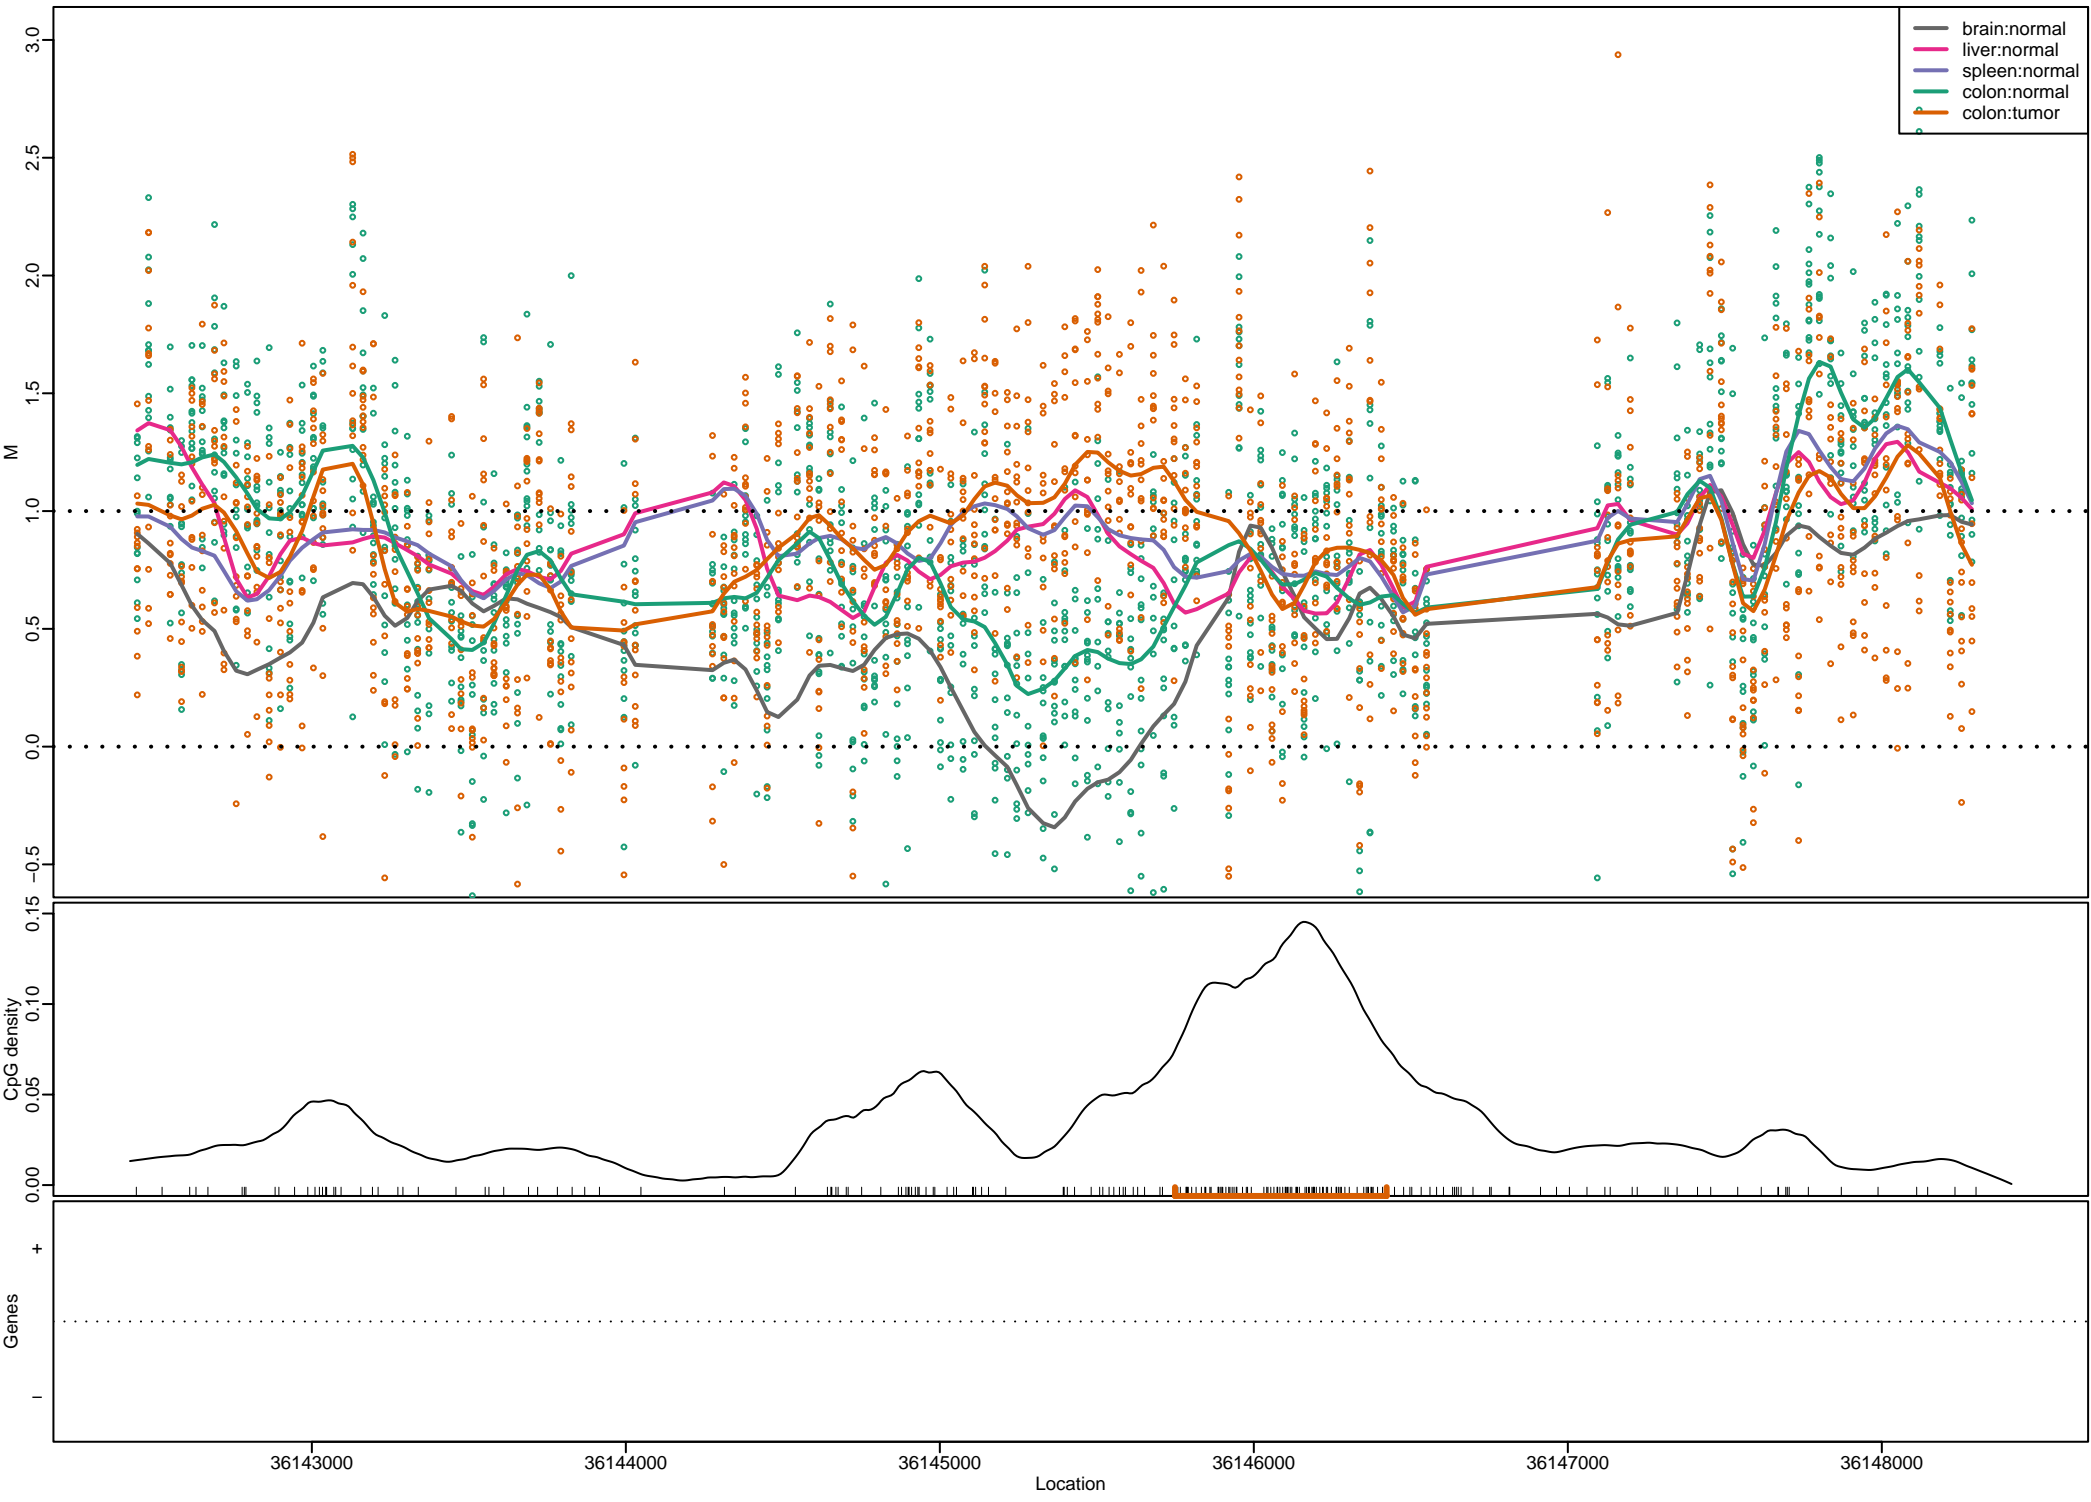

# ID:34--chr5:175016940-175020456

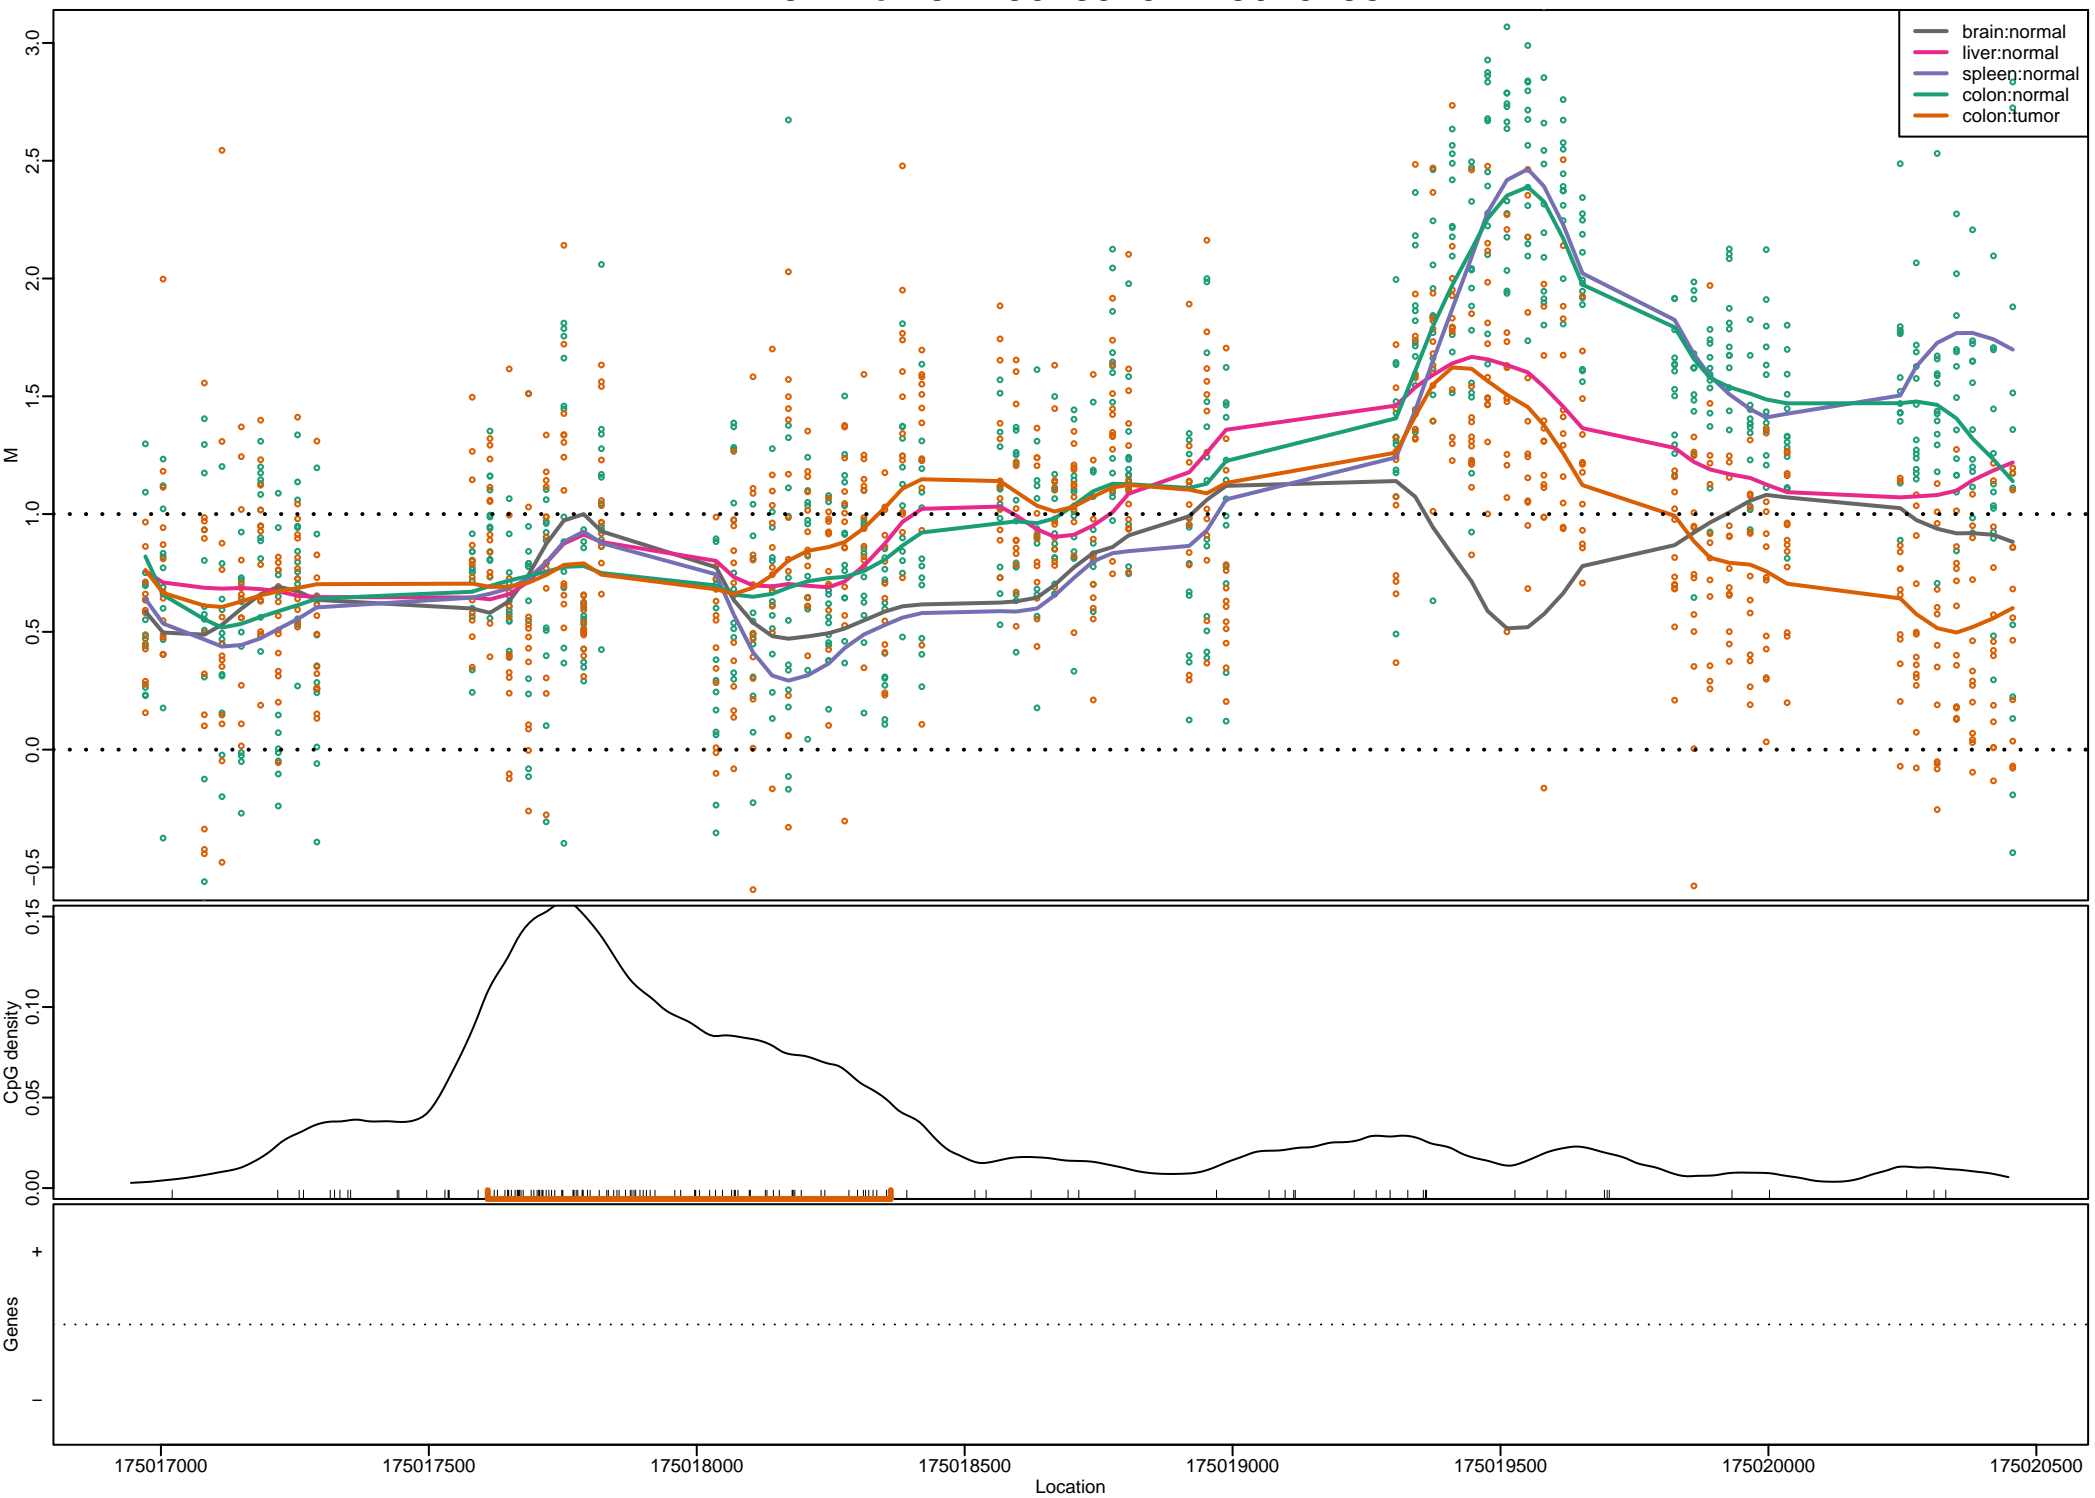

ID:35--chr8:118031723-118033393

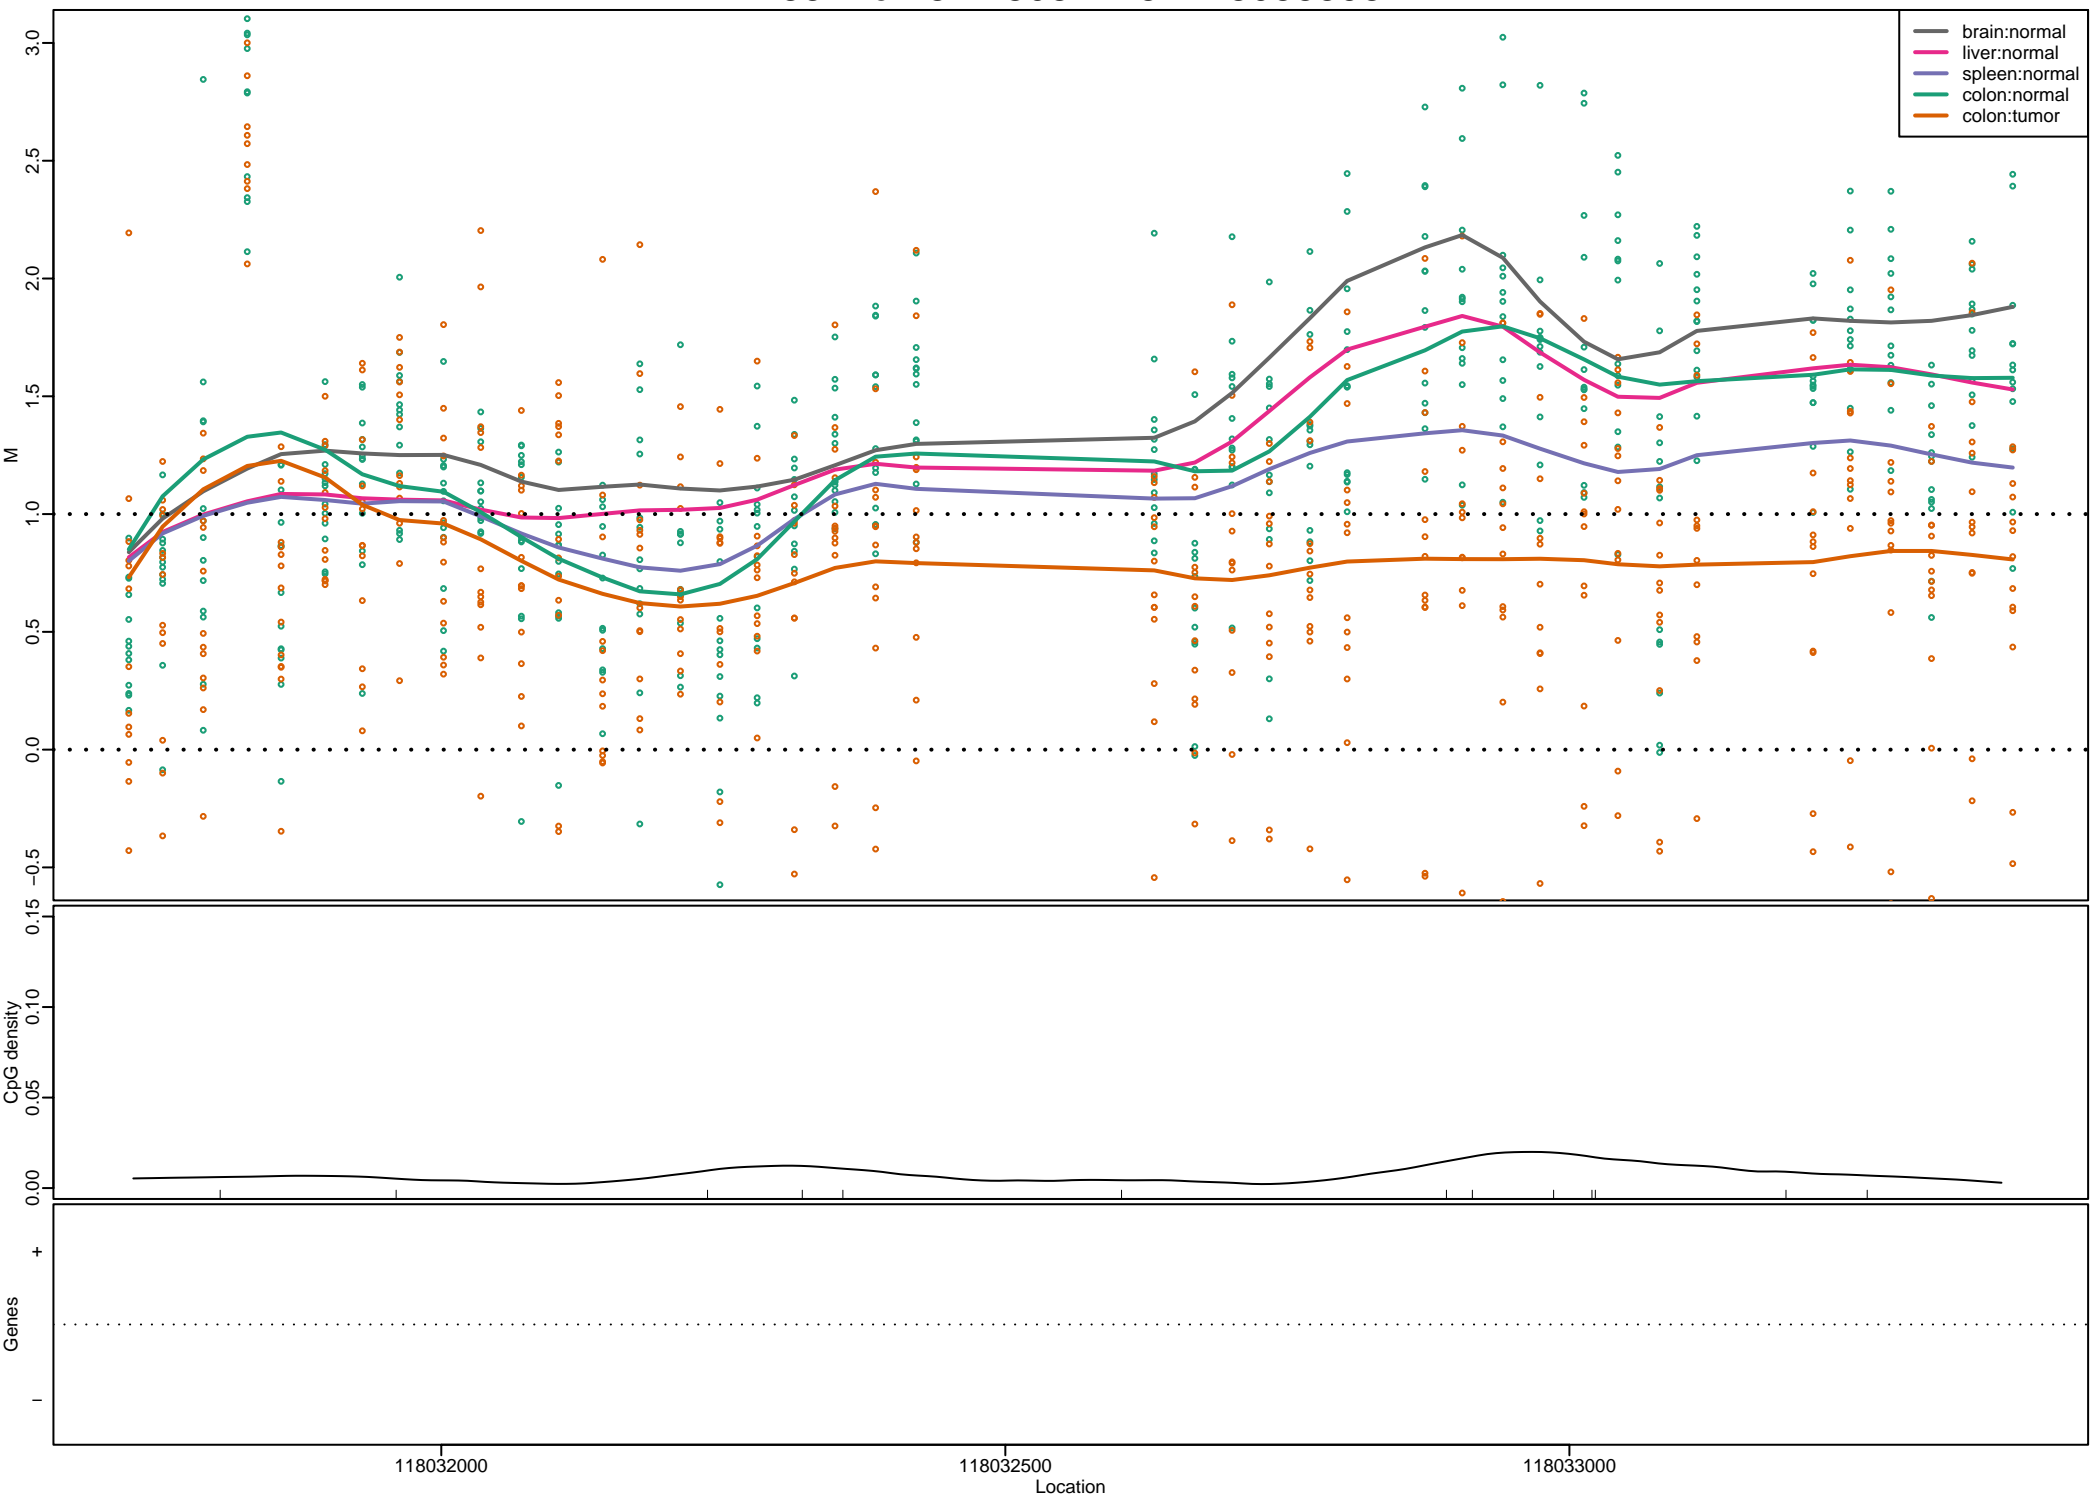

ID:36--chr7:27149635-27155635

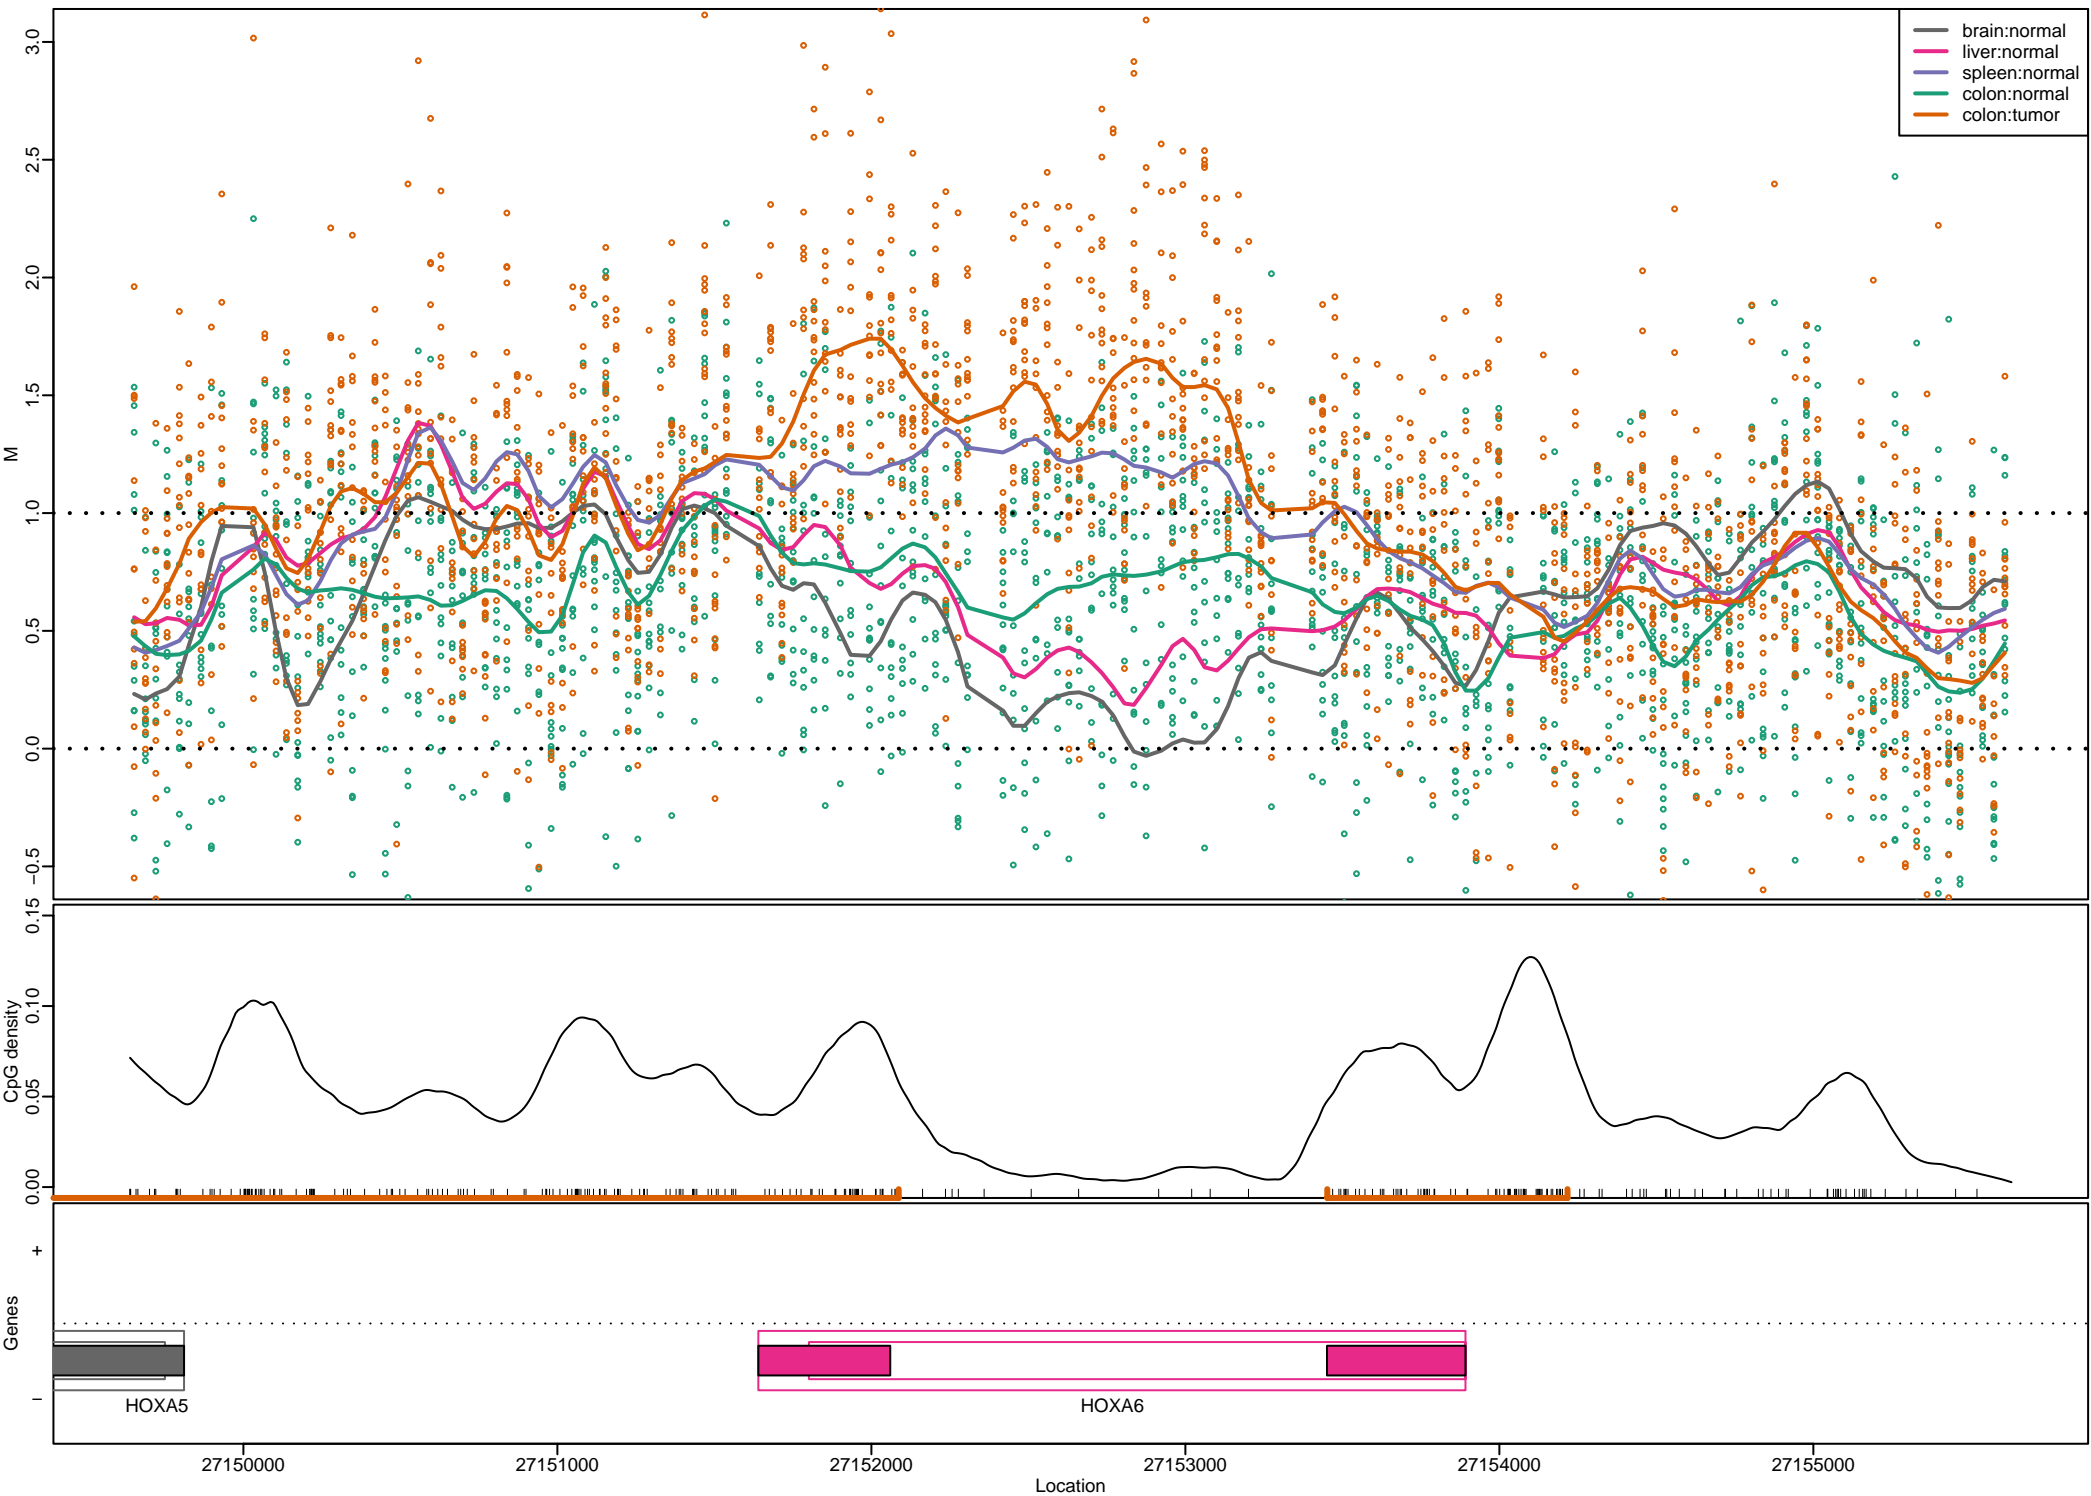

ID:37--chr12:108883476-108883965

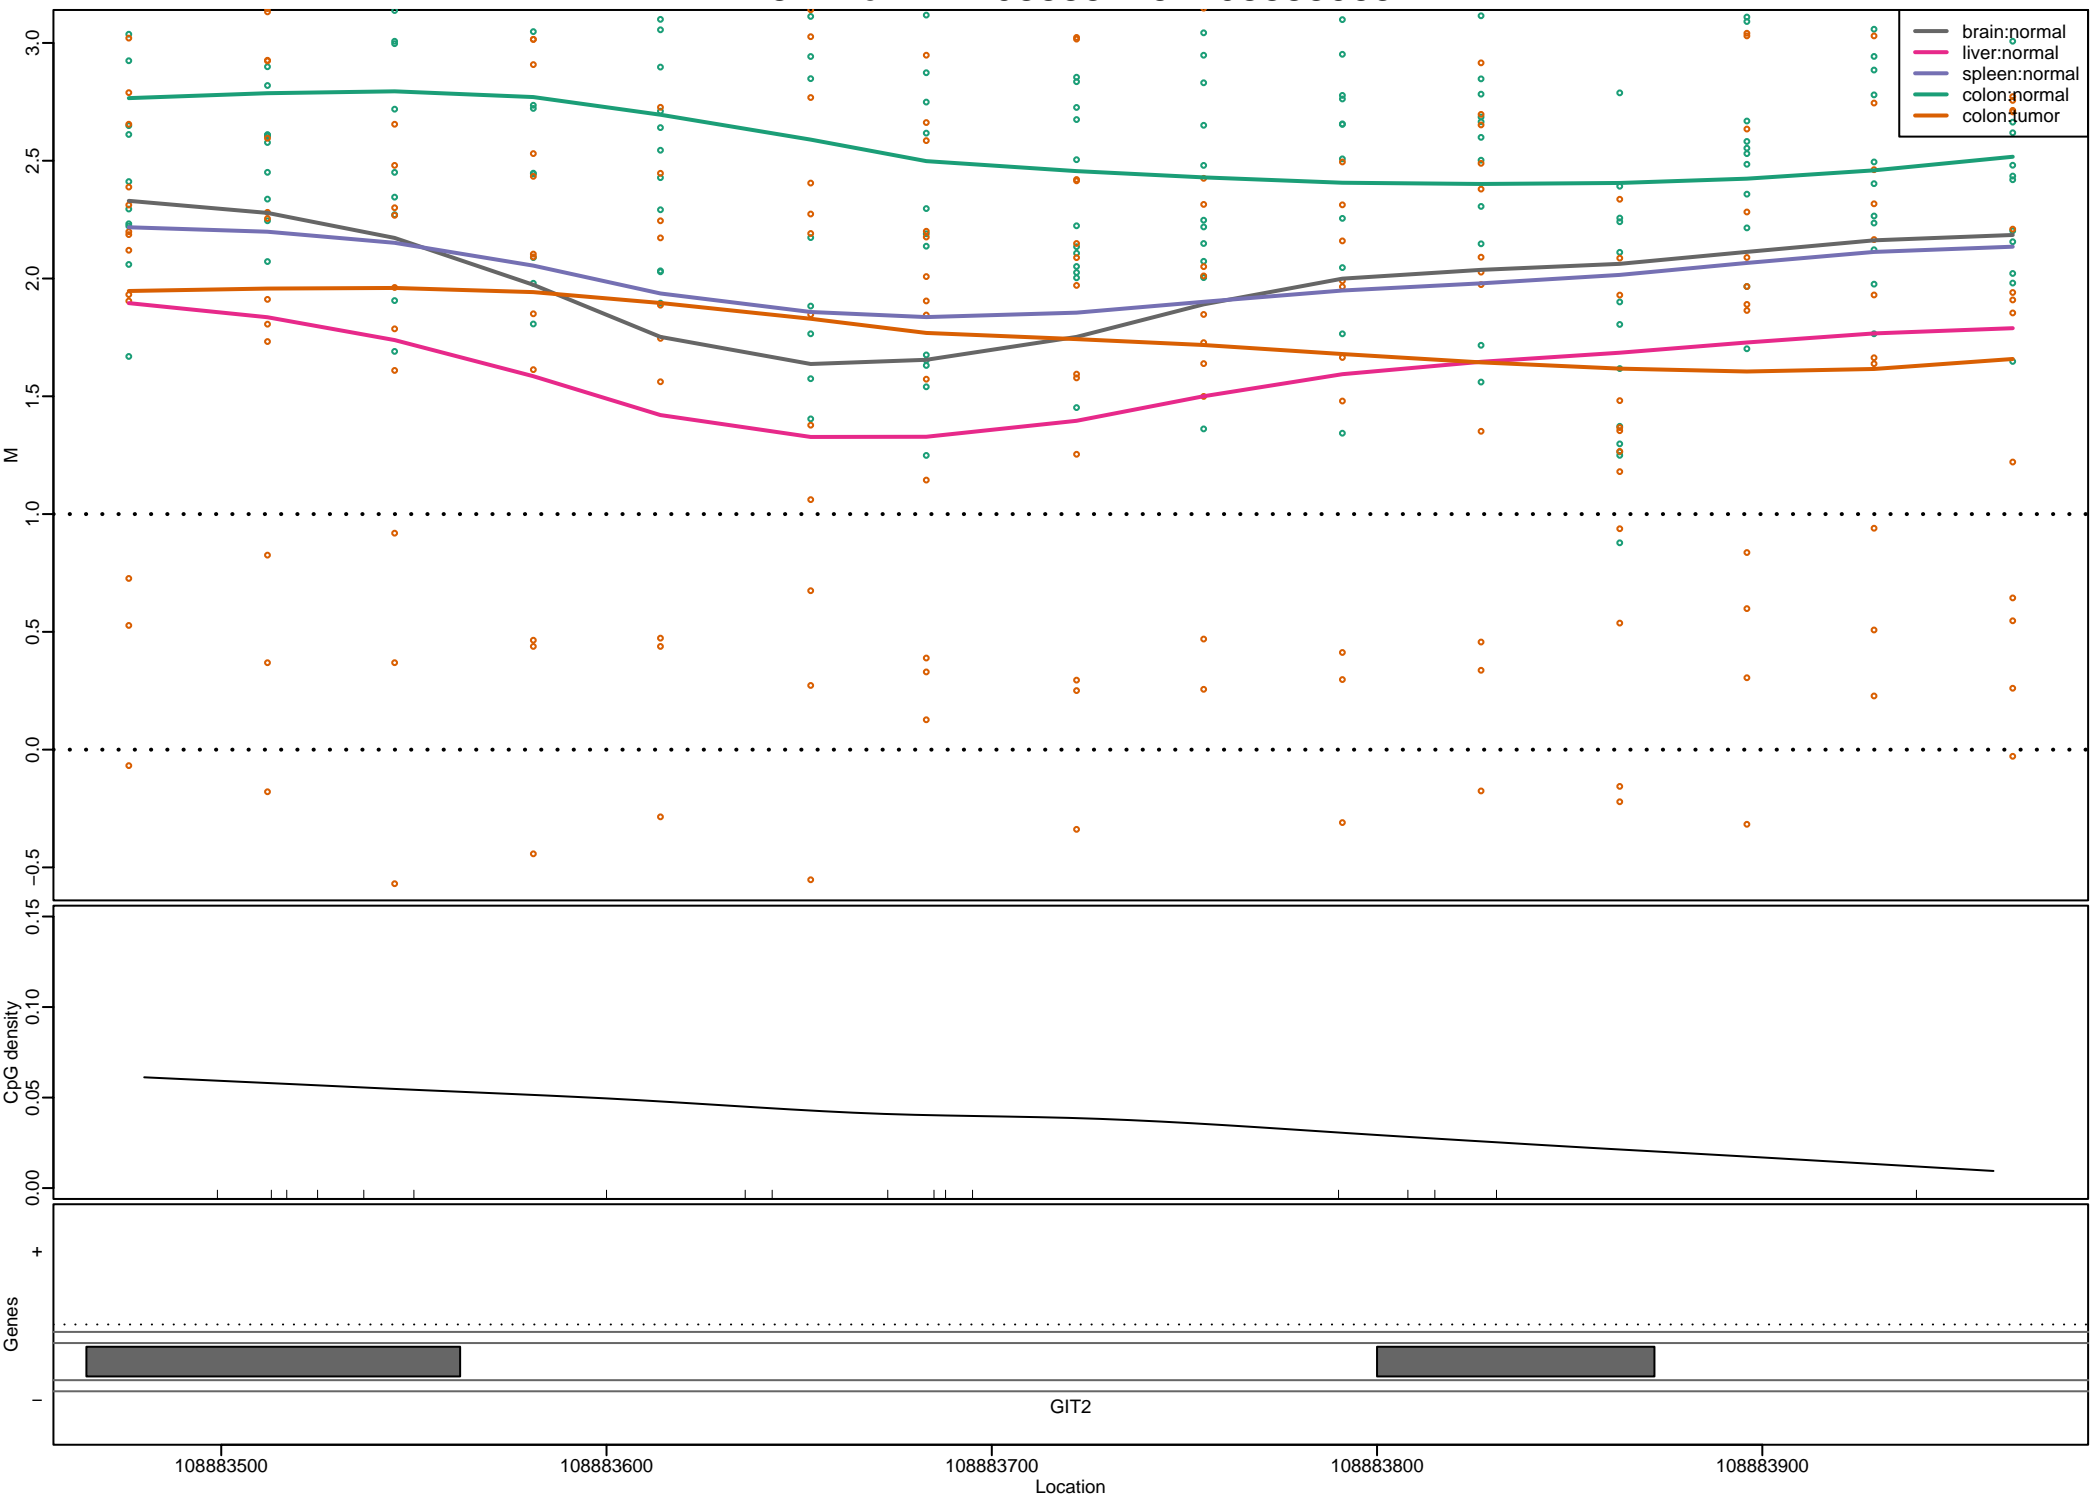

ID:38--chr7:4865334-4868726

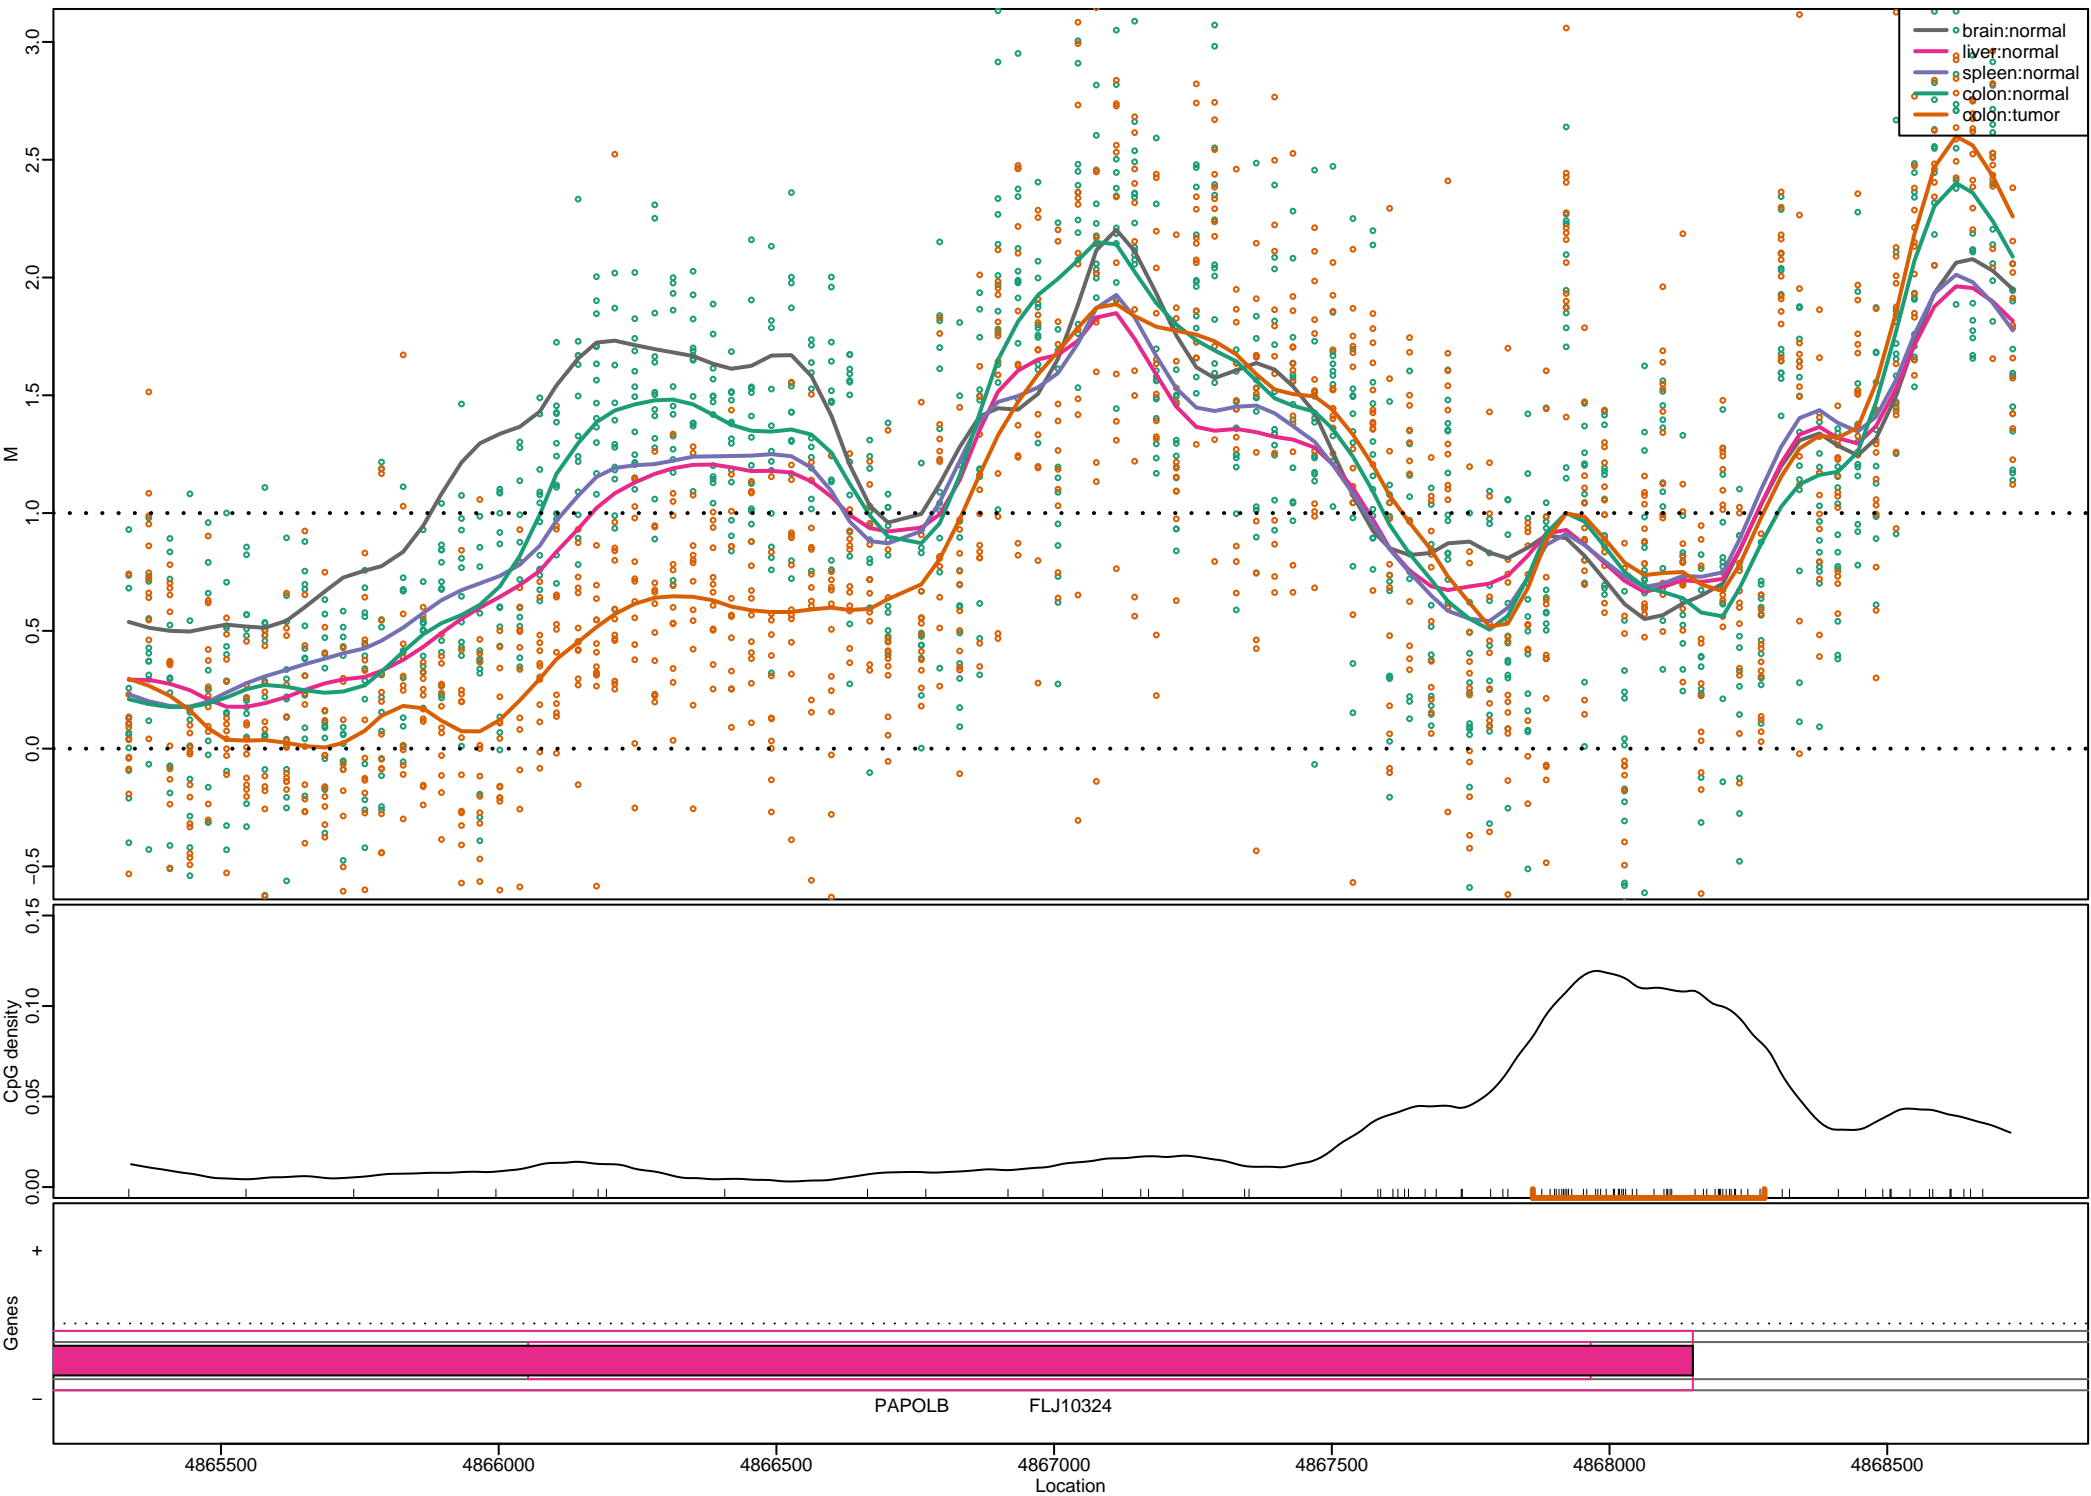

ID:39--chr15:70196091-70199711

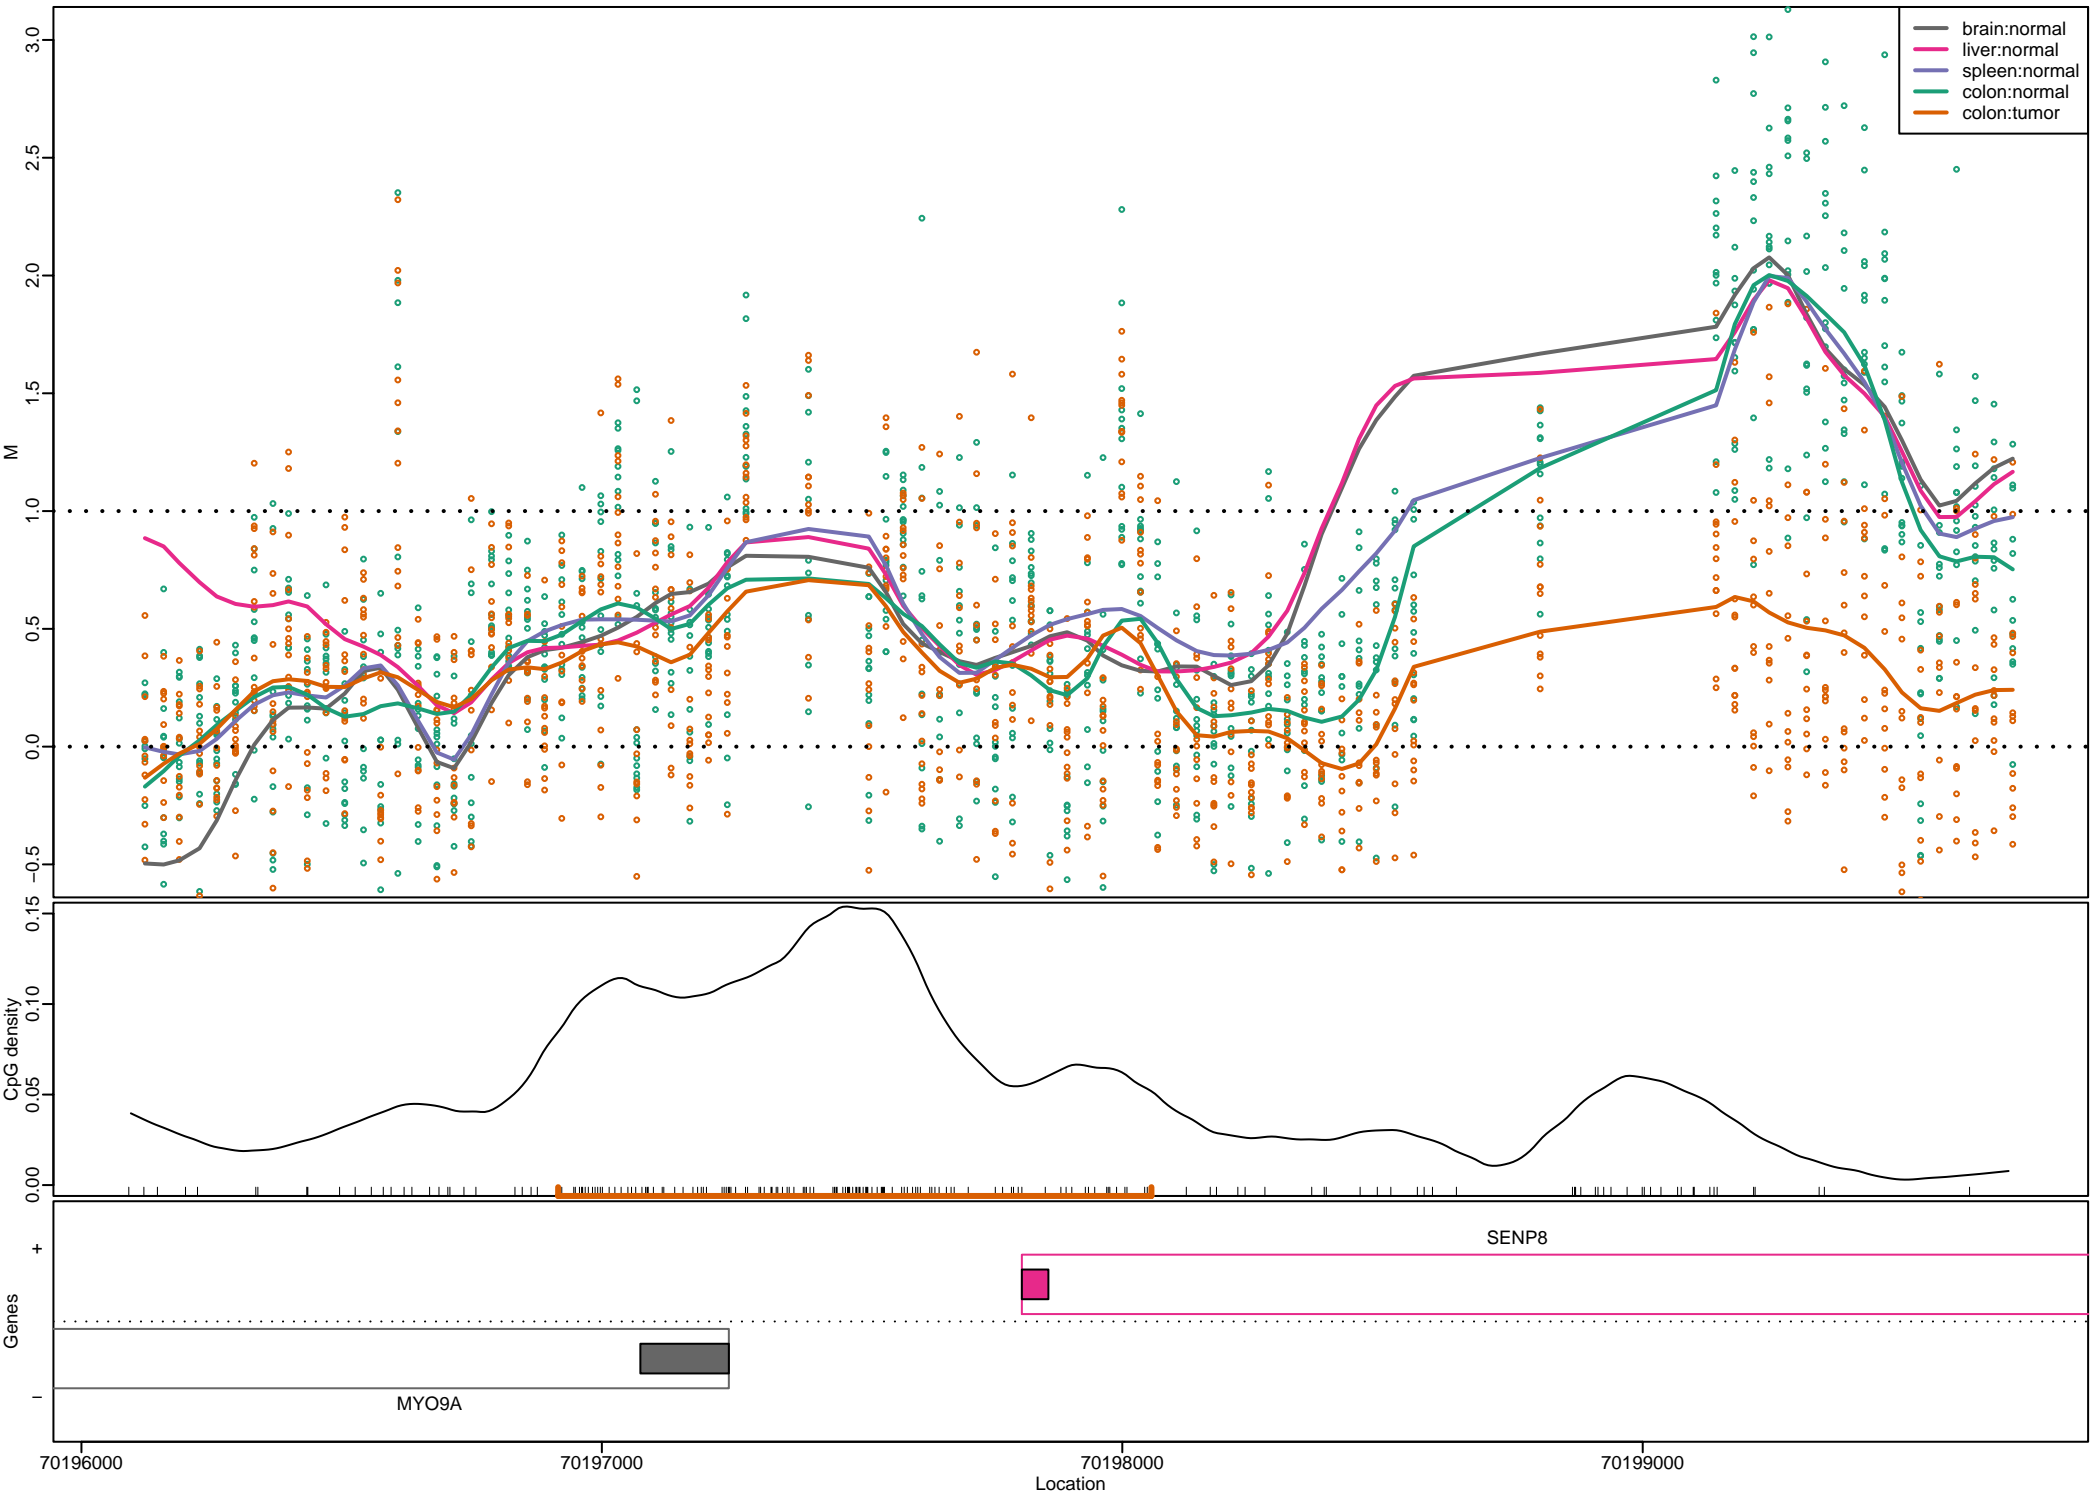



ID:40--chr19:63146186-63151236

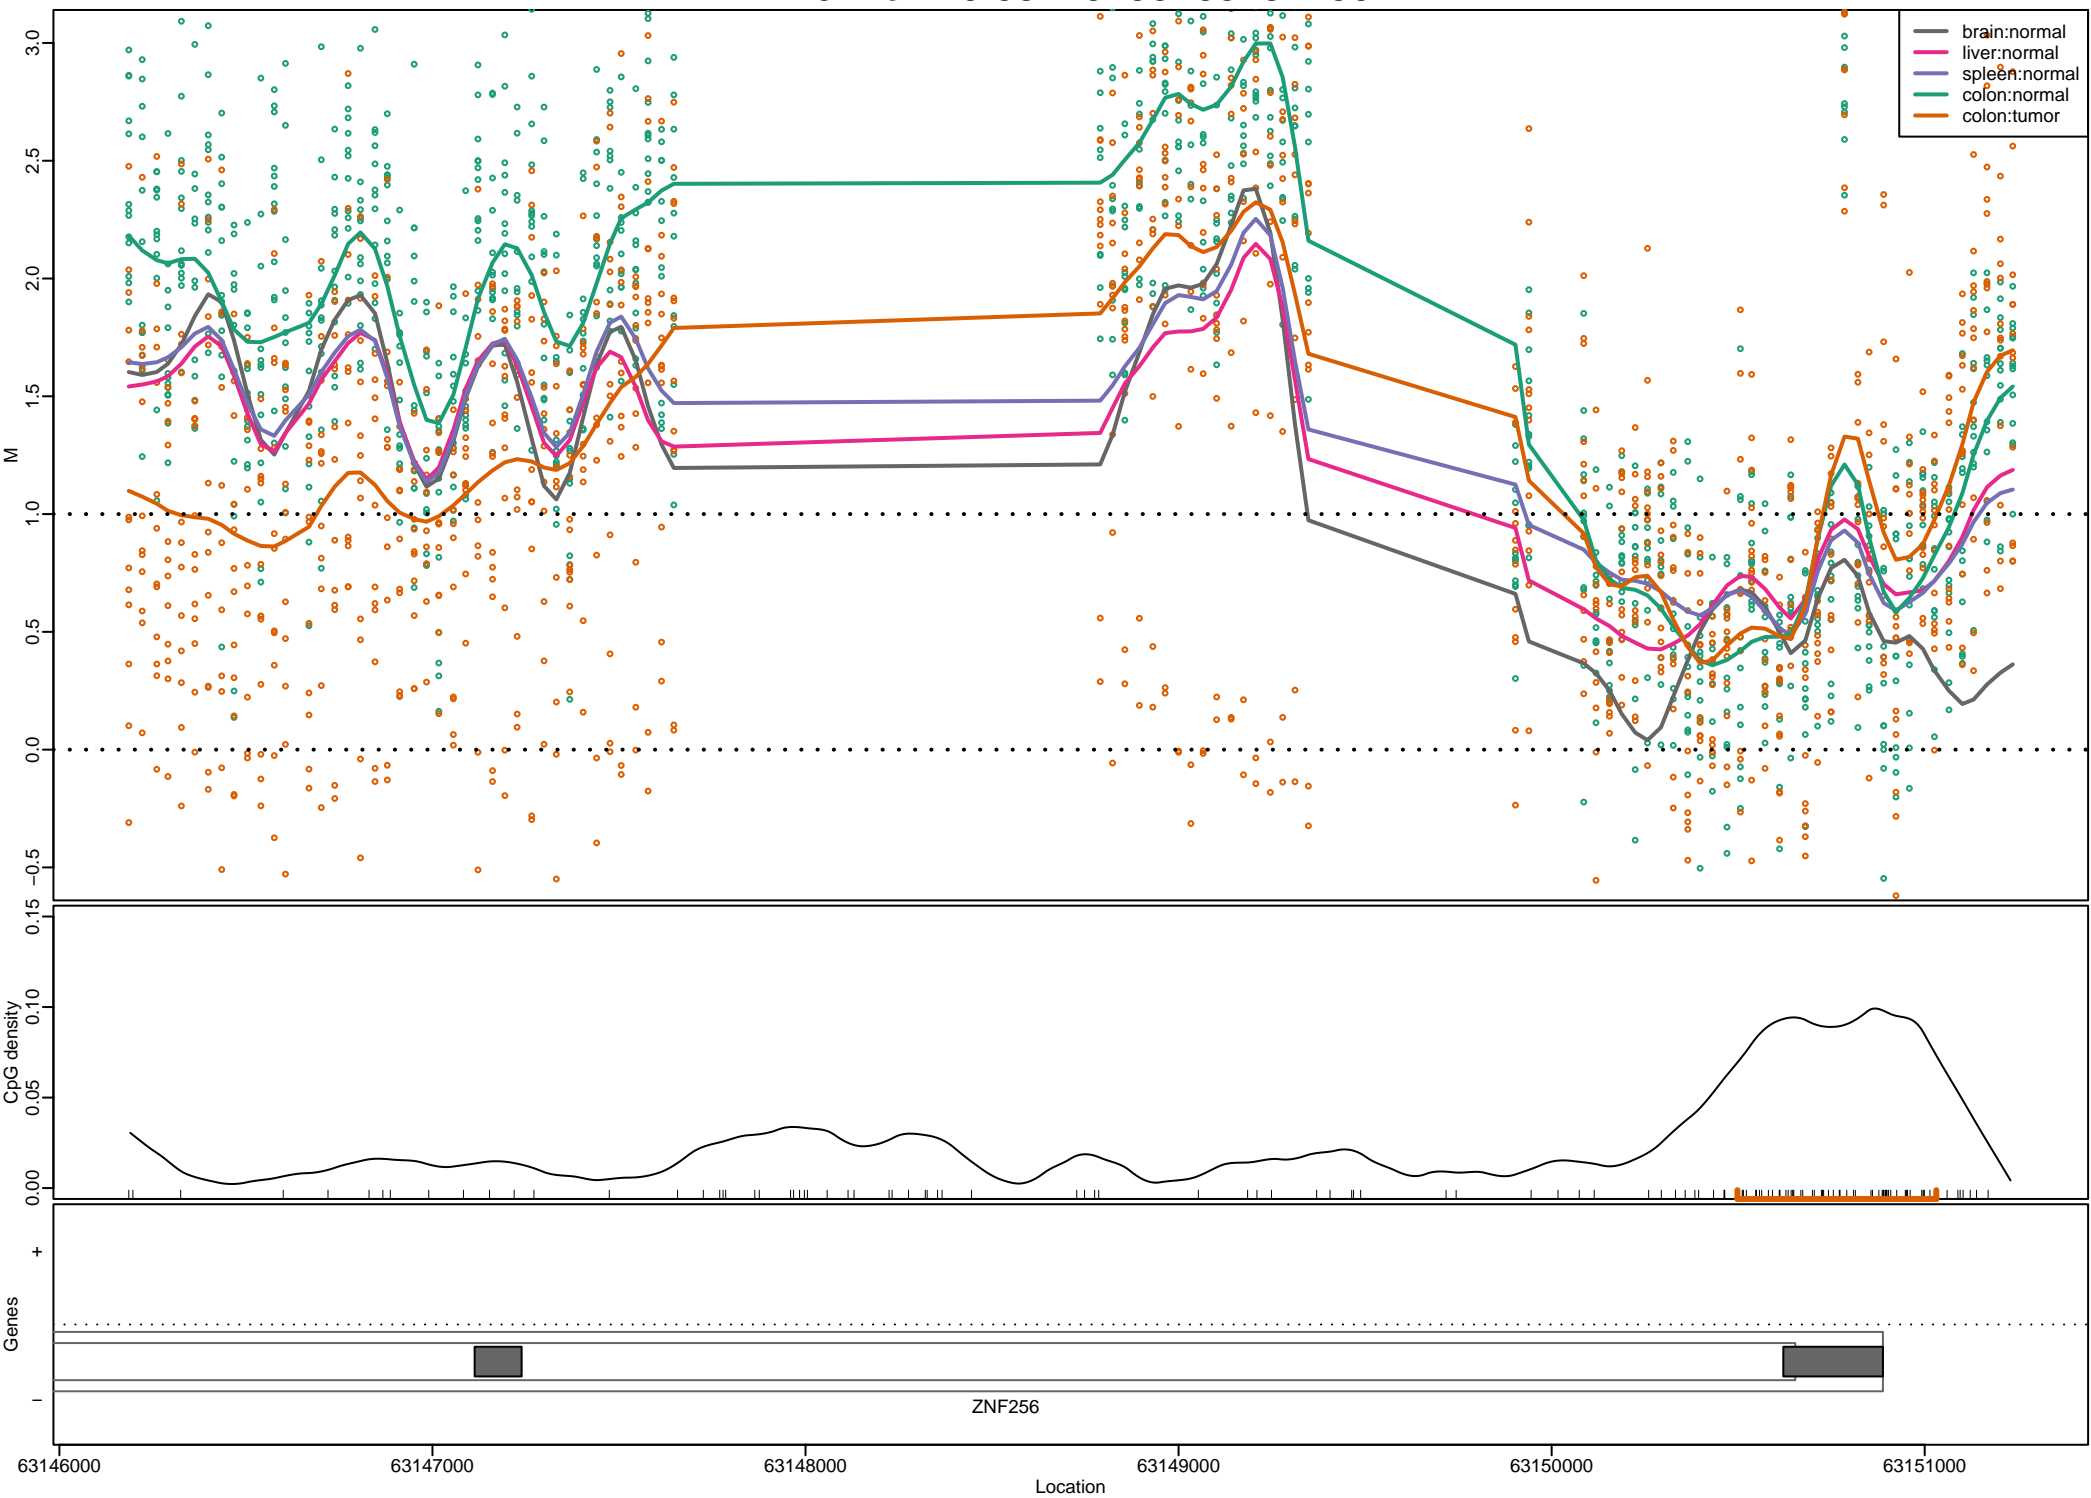

ID:41--chr12:128898371-128902680

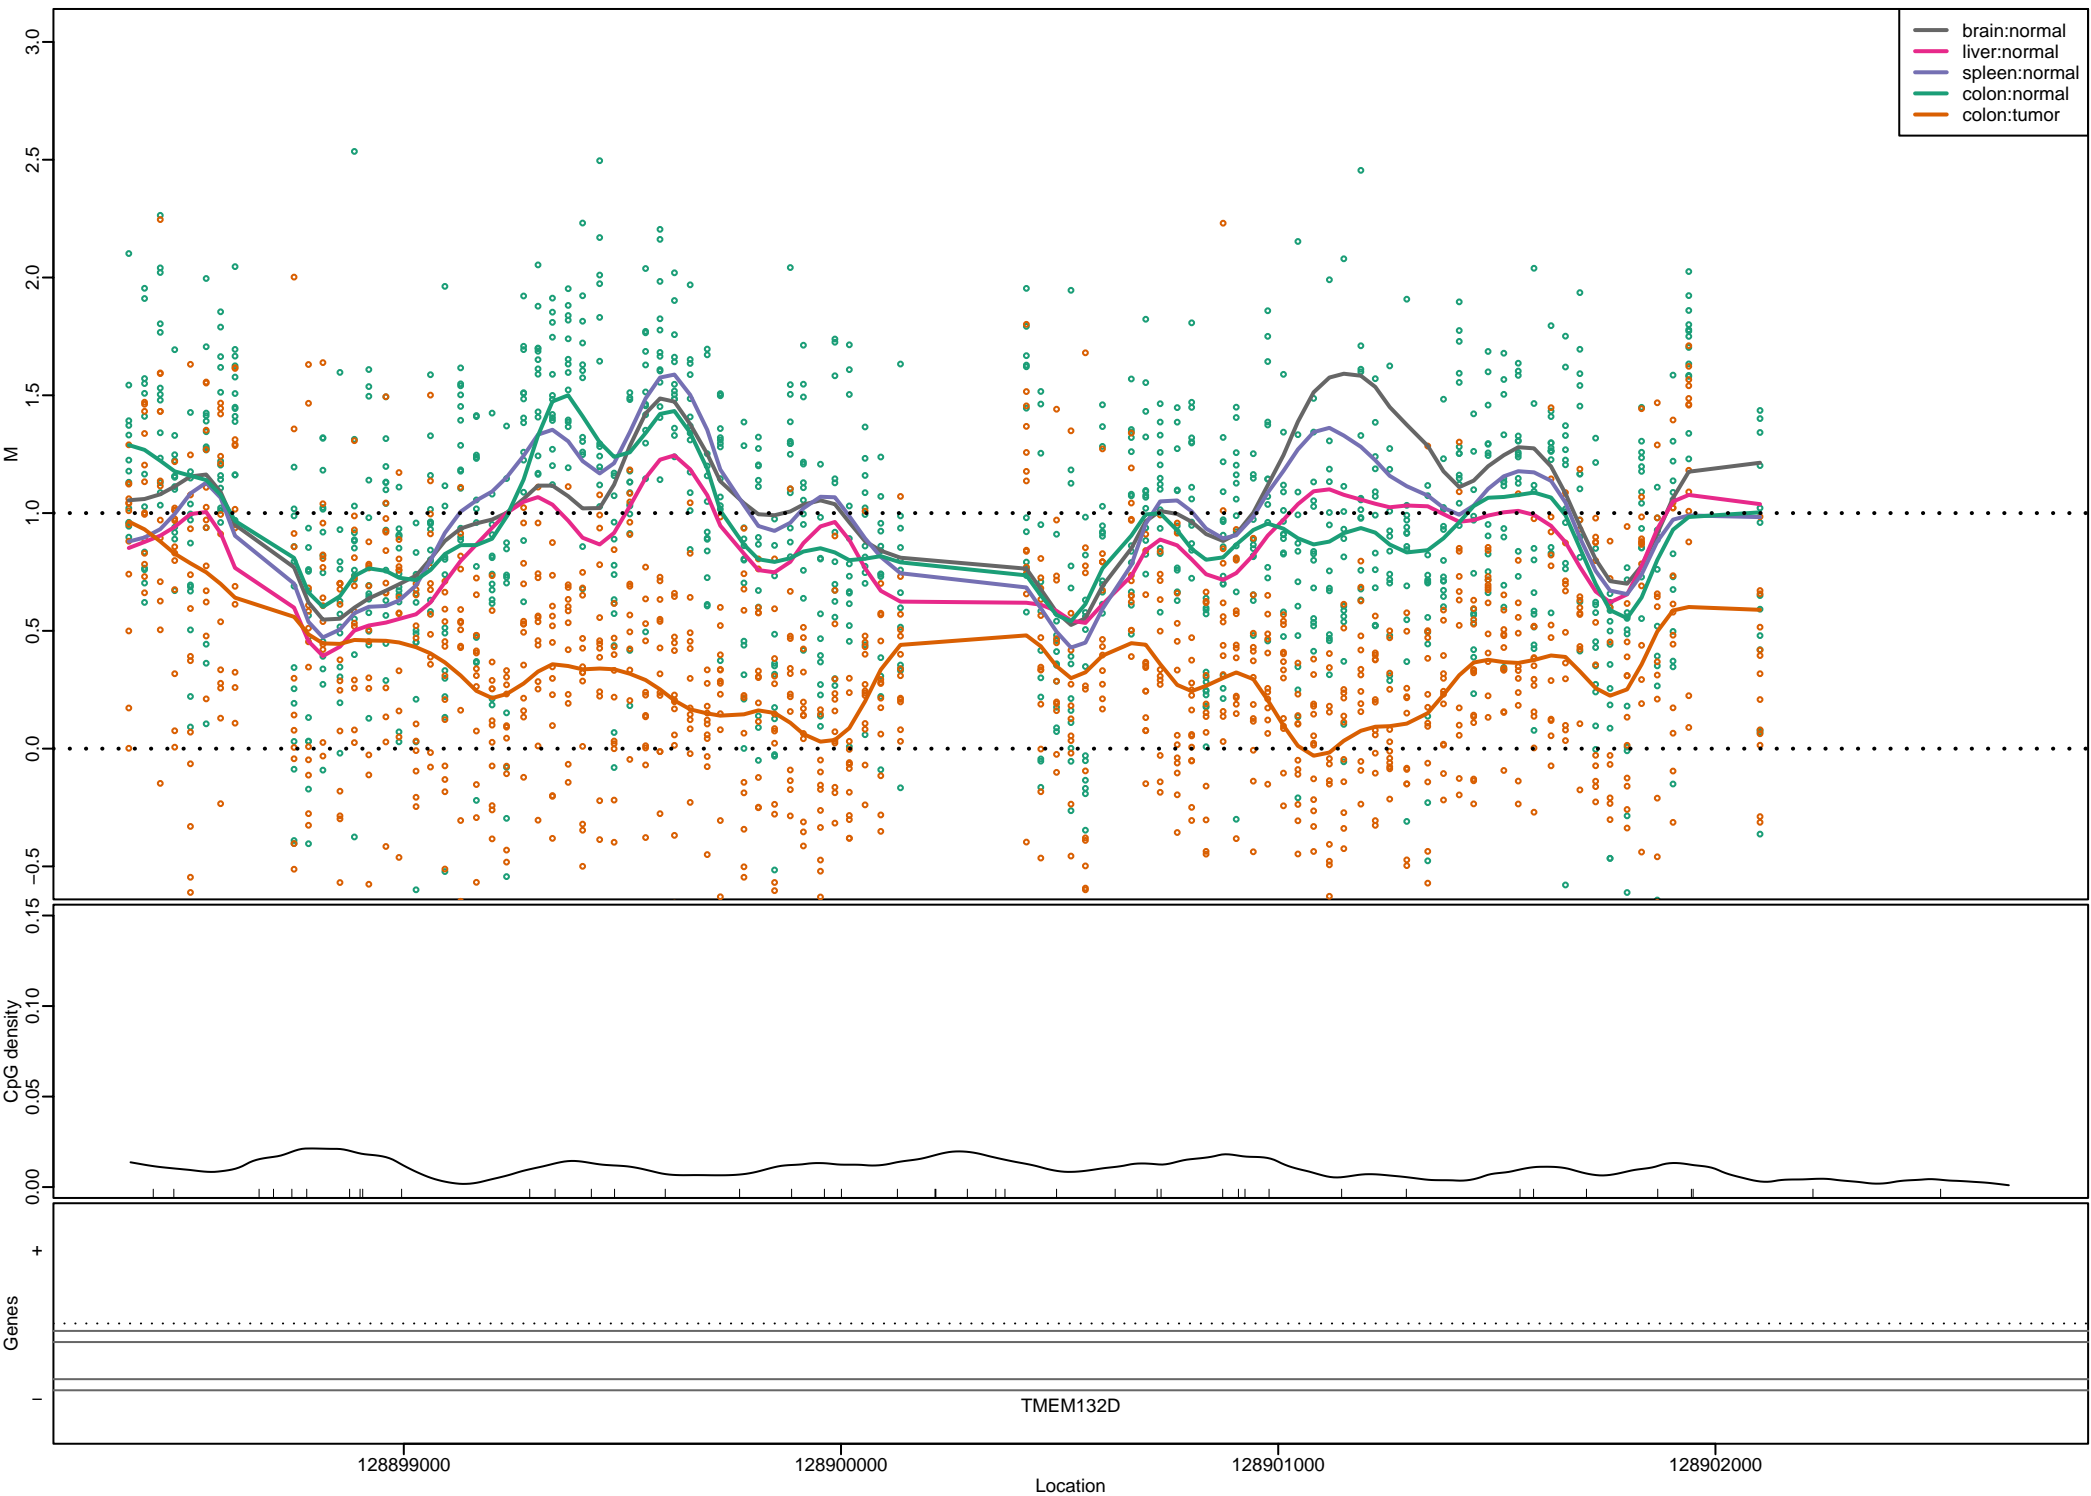

ID:42--chr1:14091367-14093934

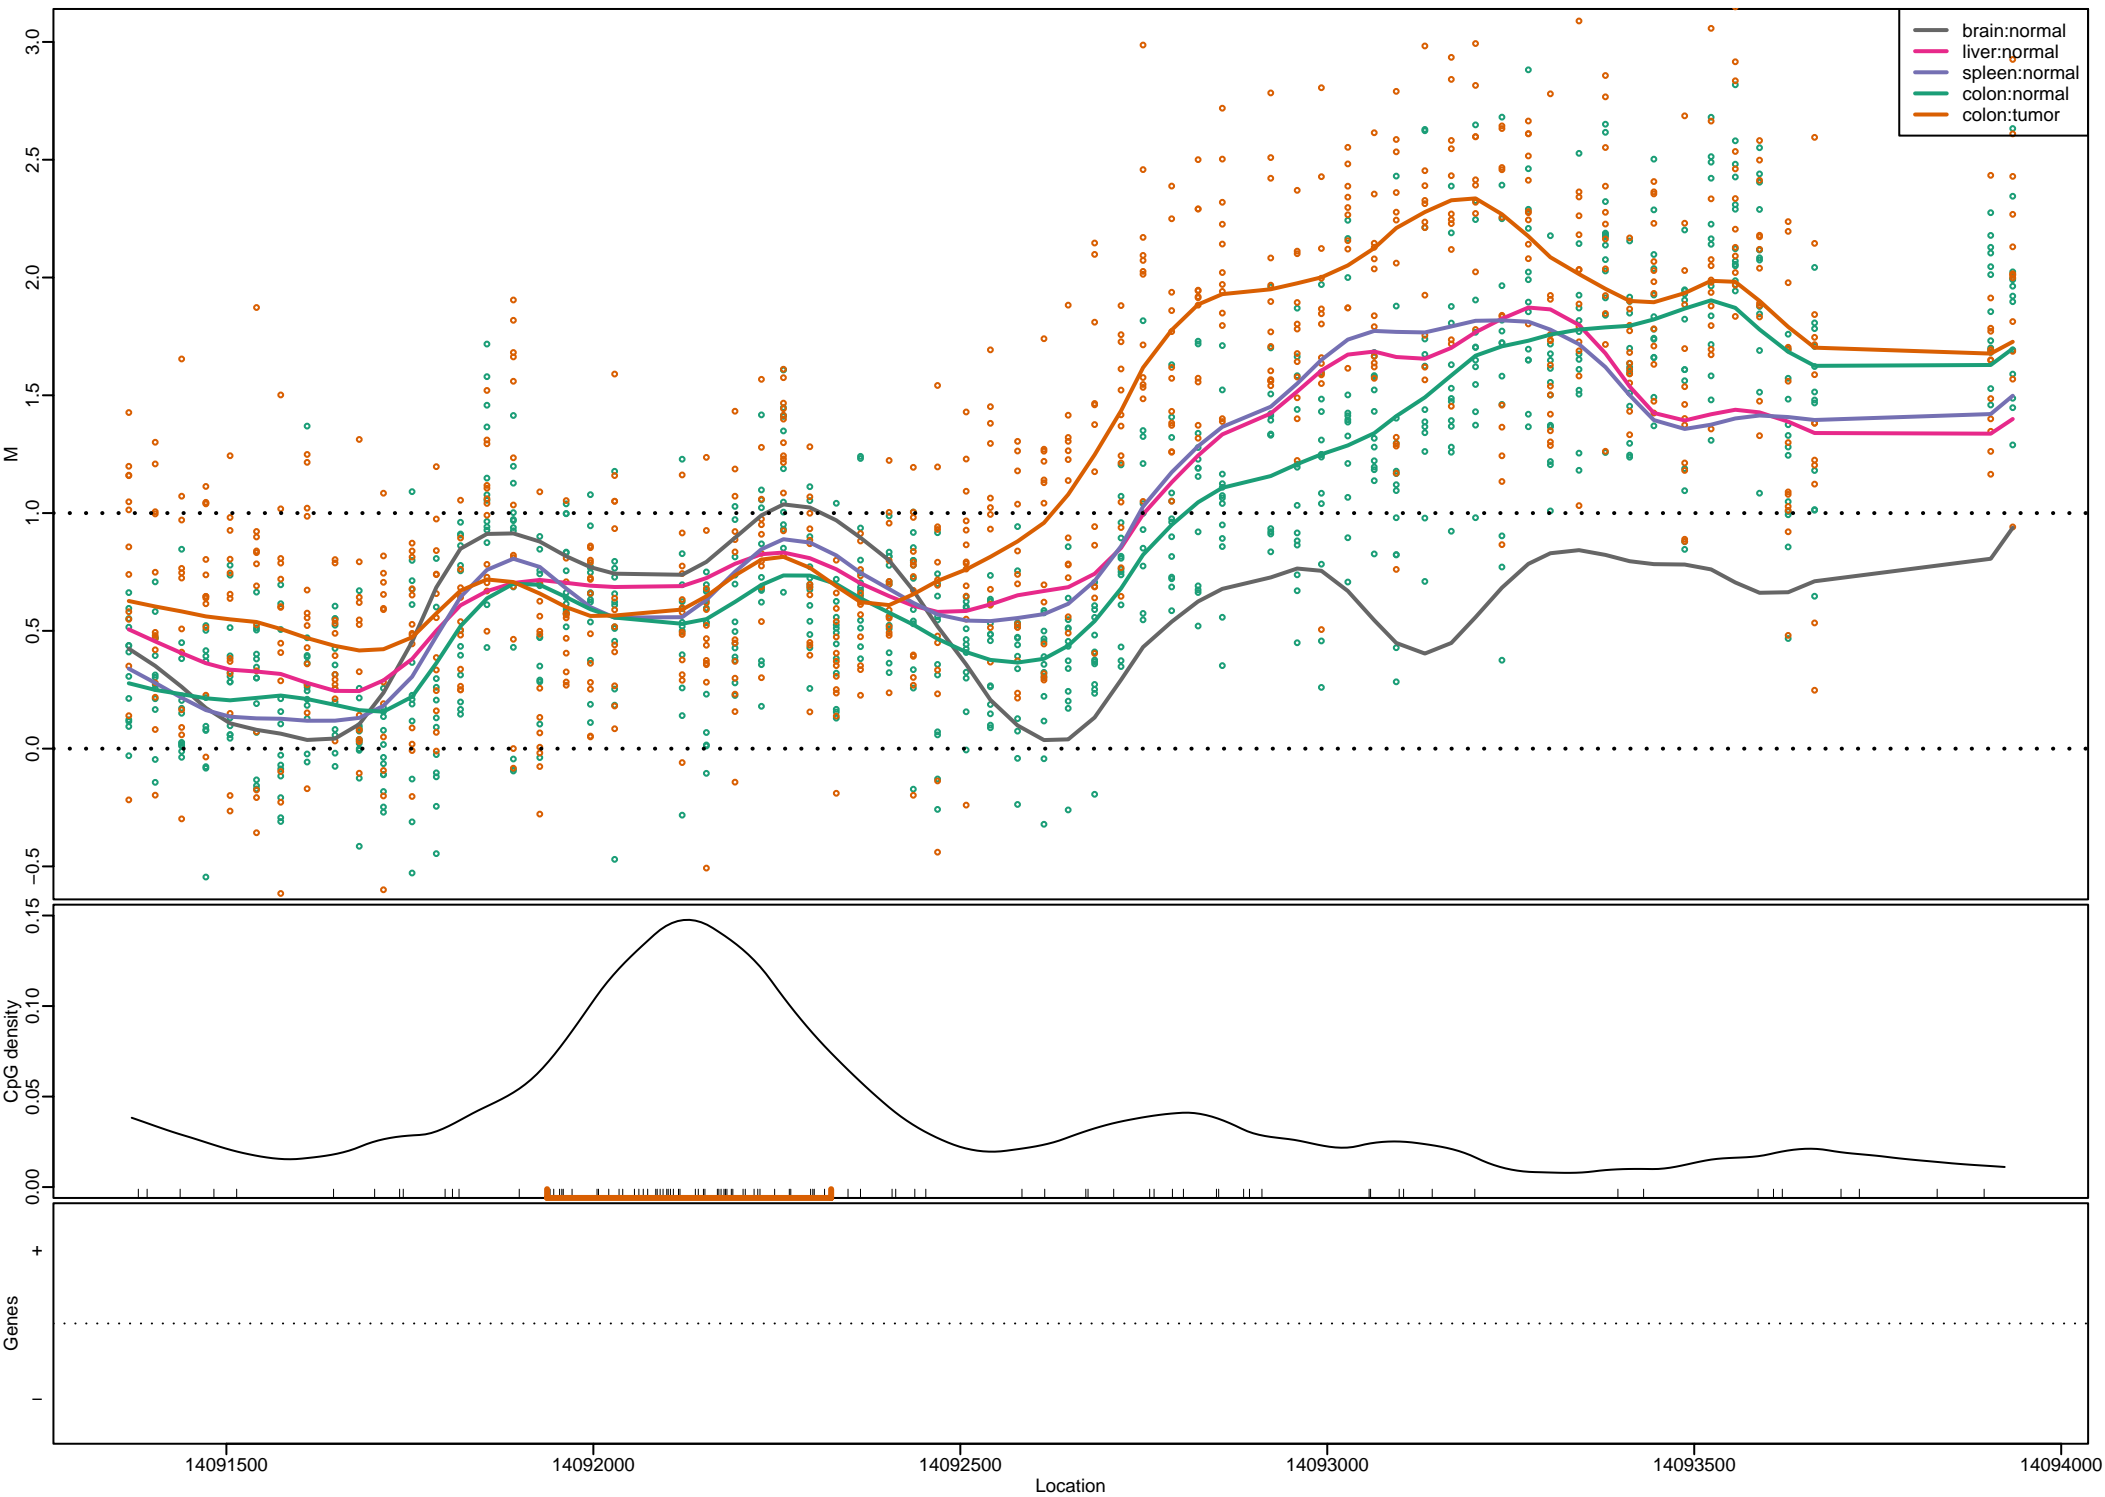

ID:43--chr20:56857832-56862832

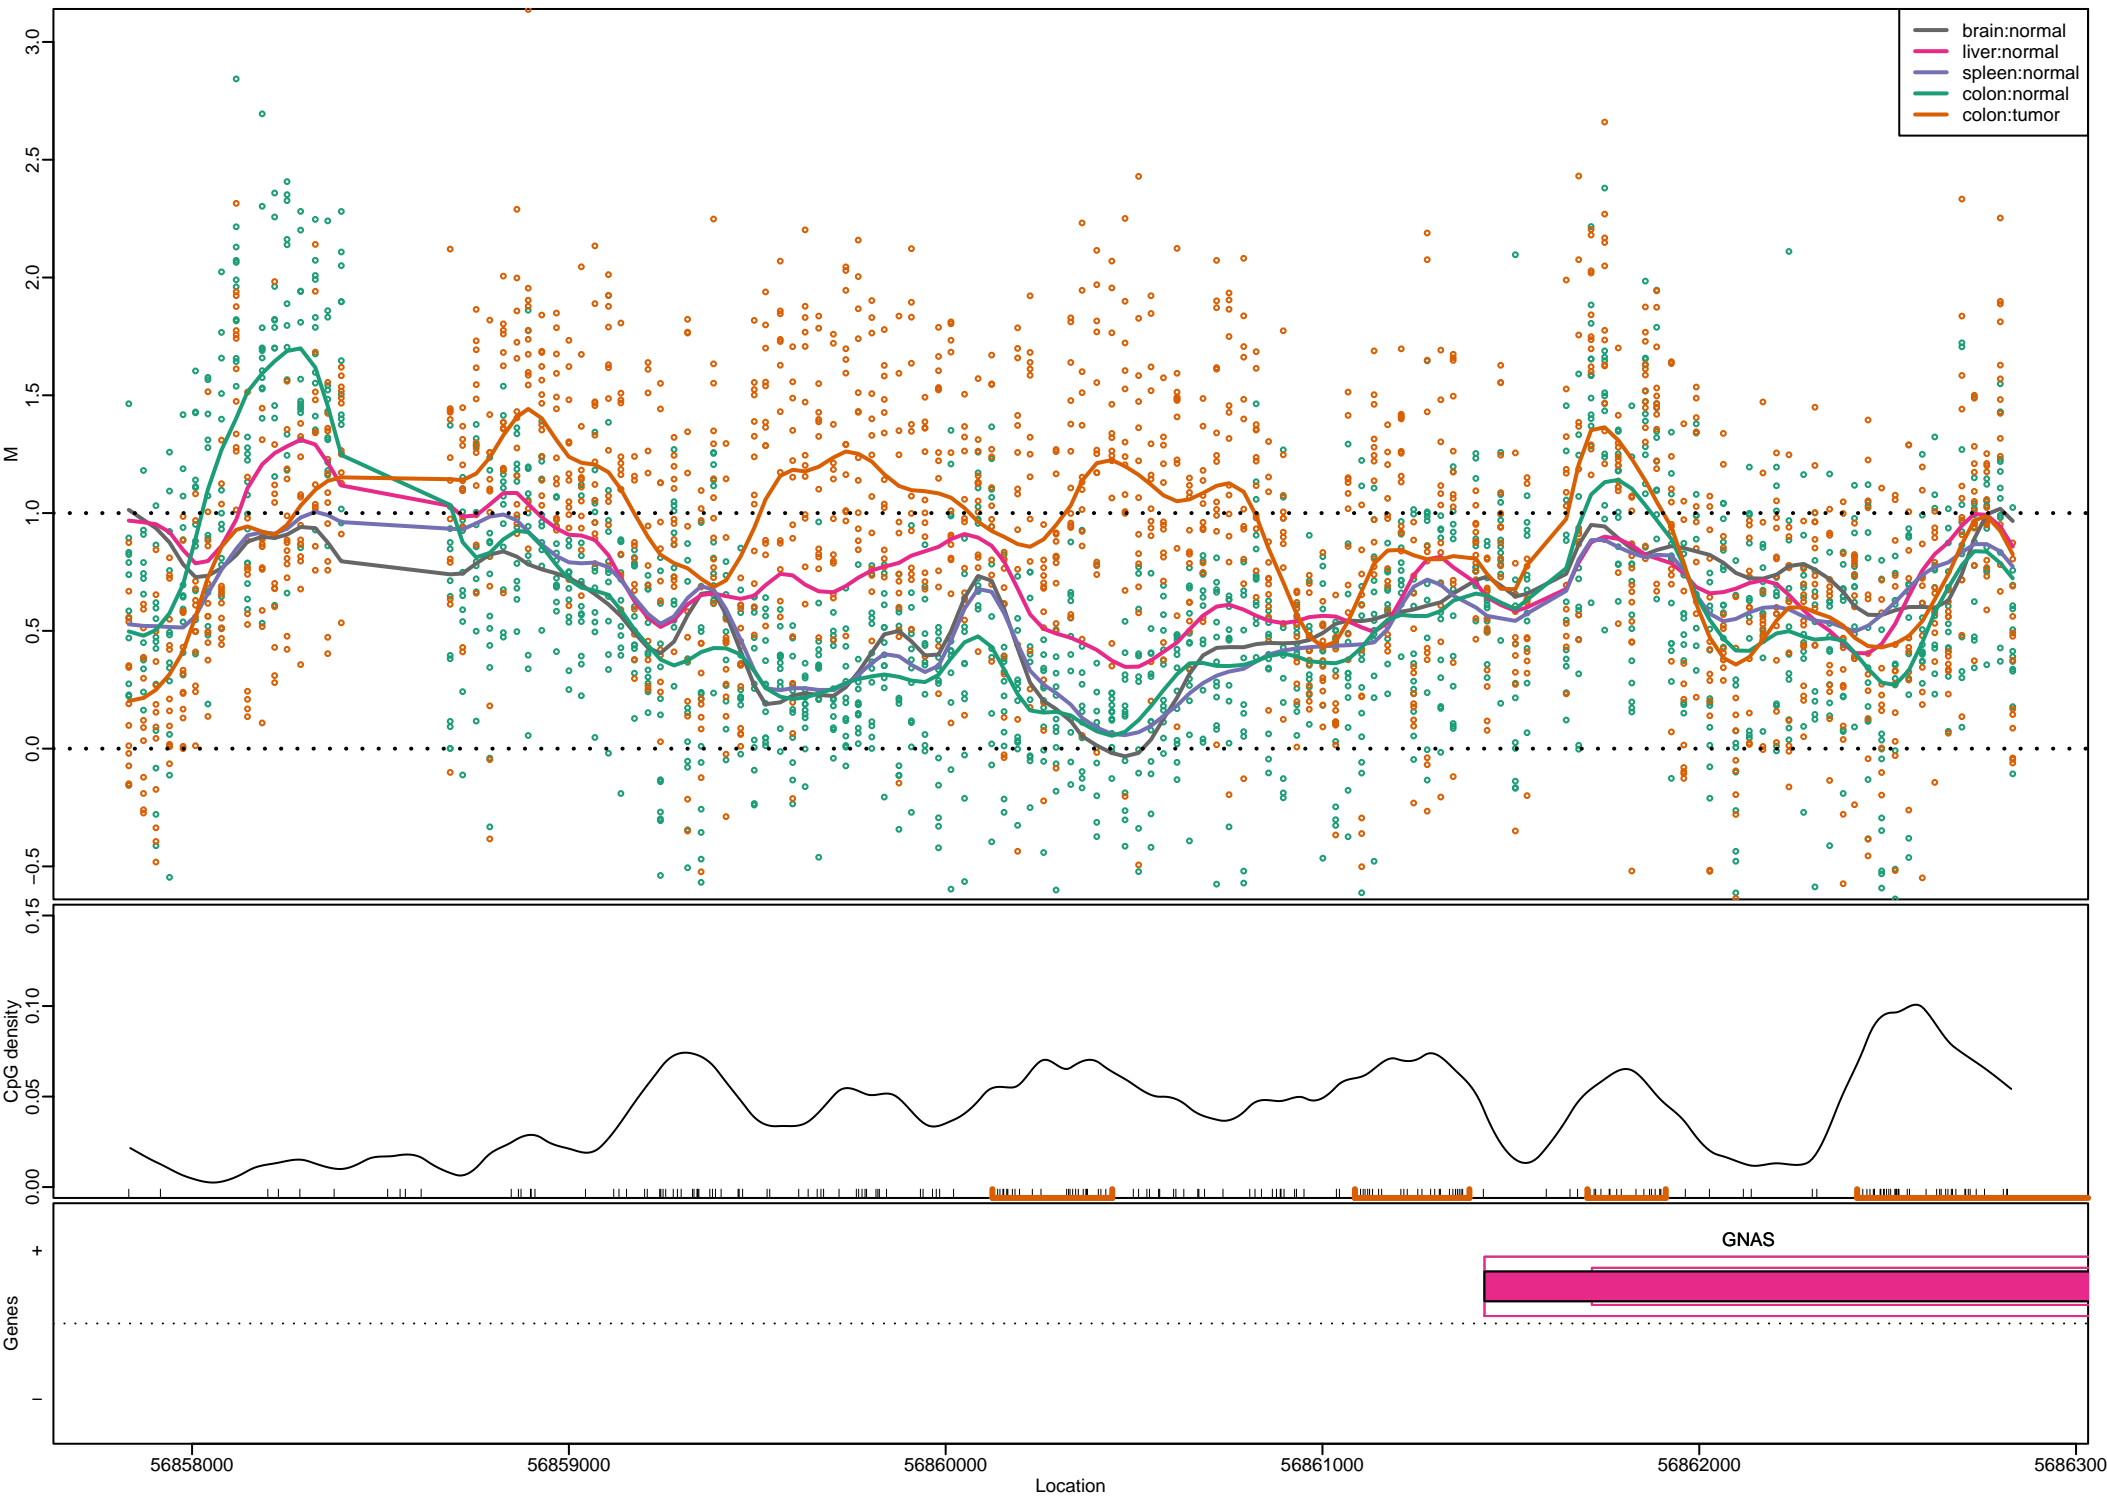

ID:44--chr6:50873235-50873833

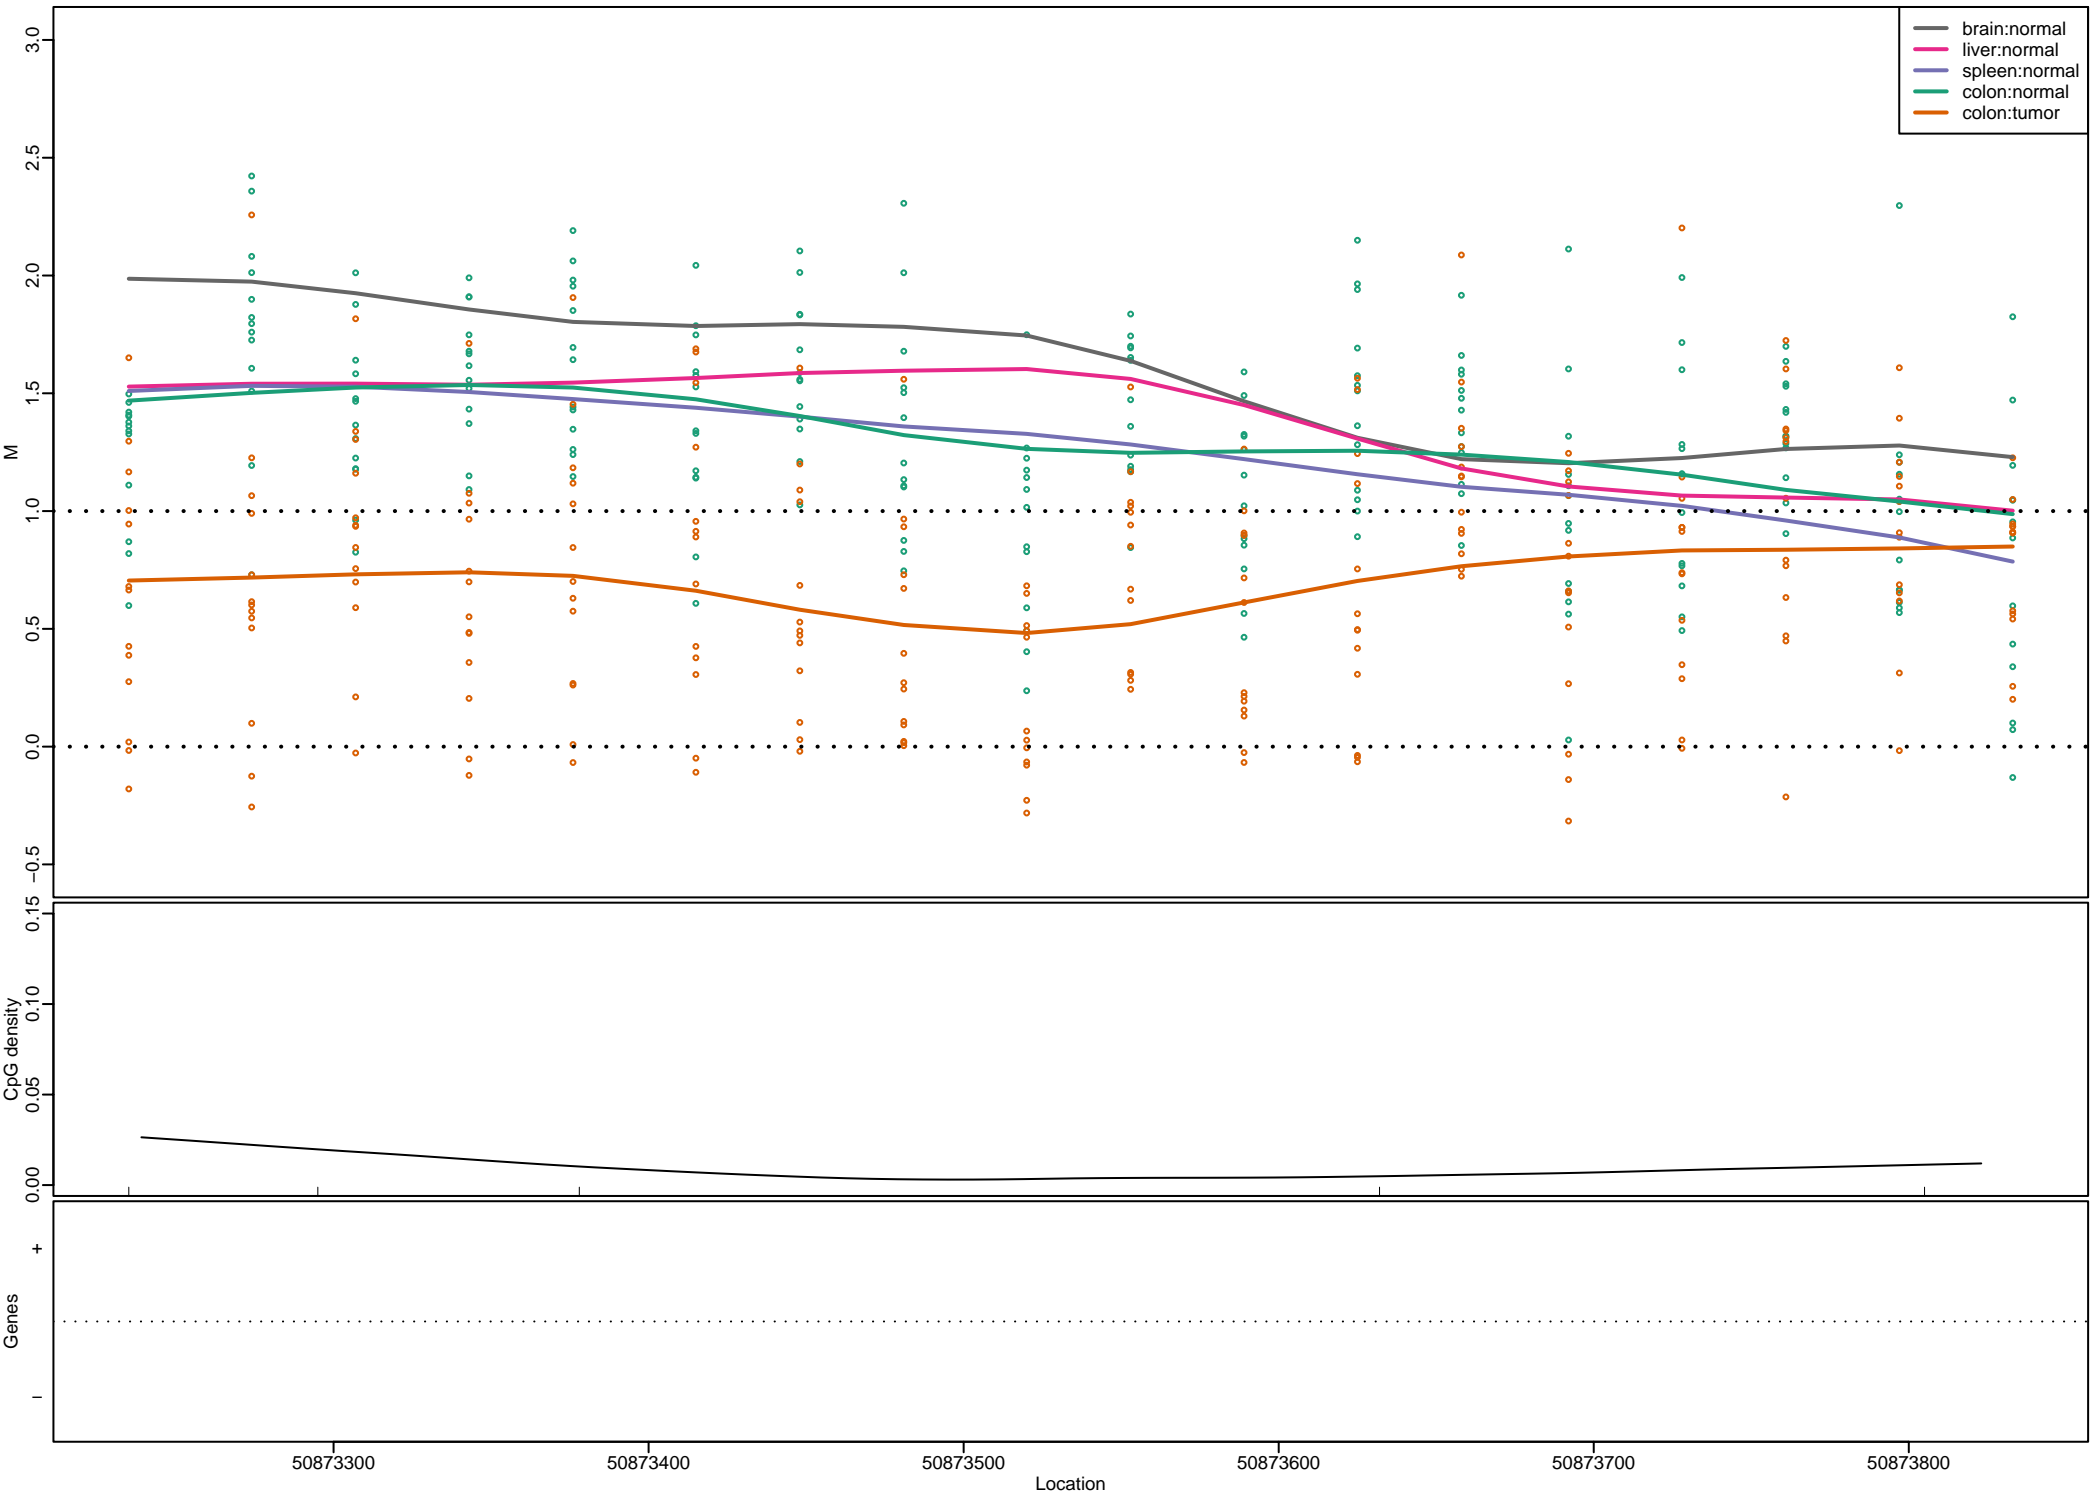

ID:45--chr9:101170294-101172048

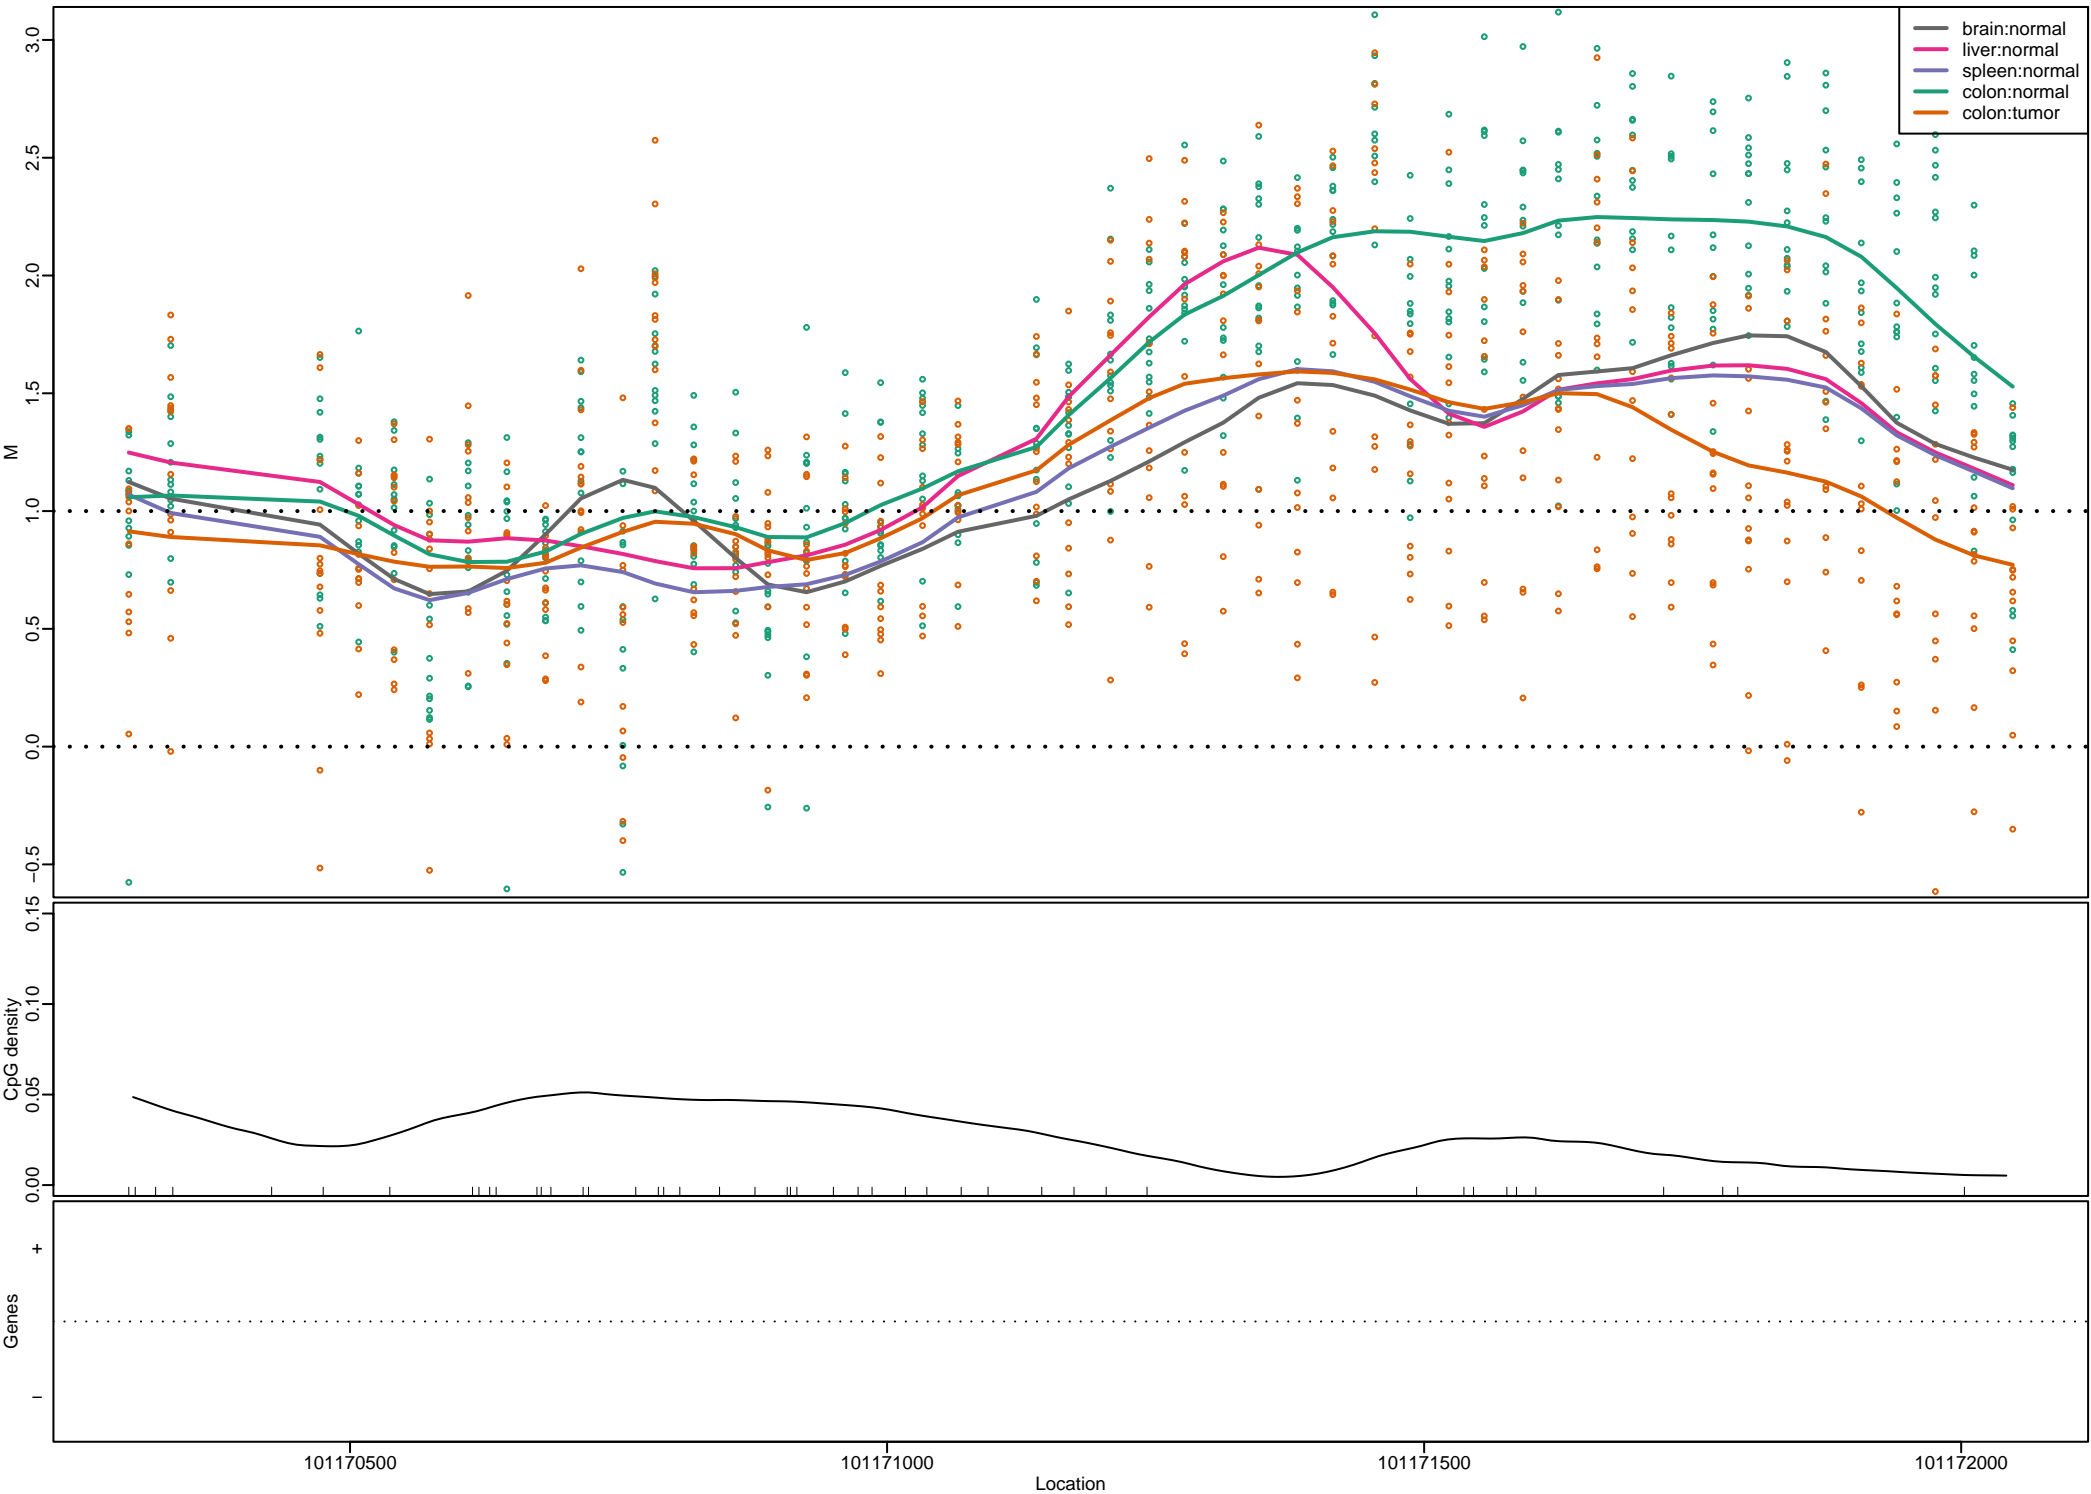

ID:46--chr7:145025959-145027357

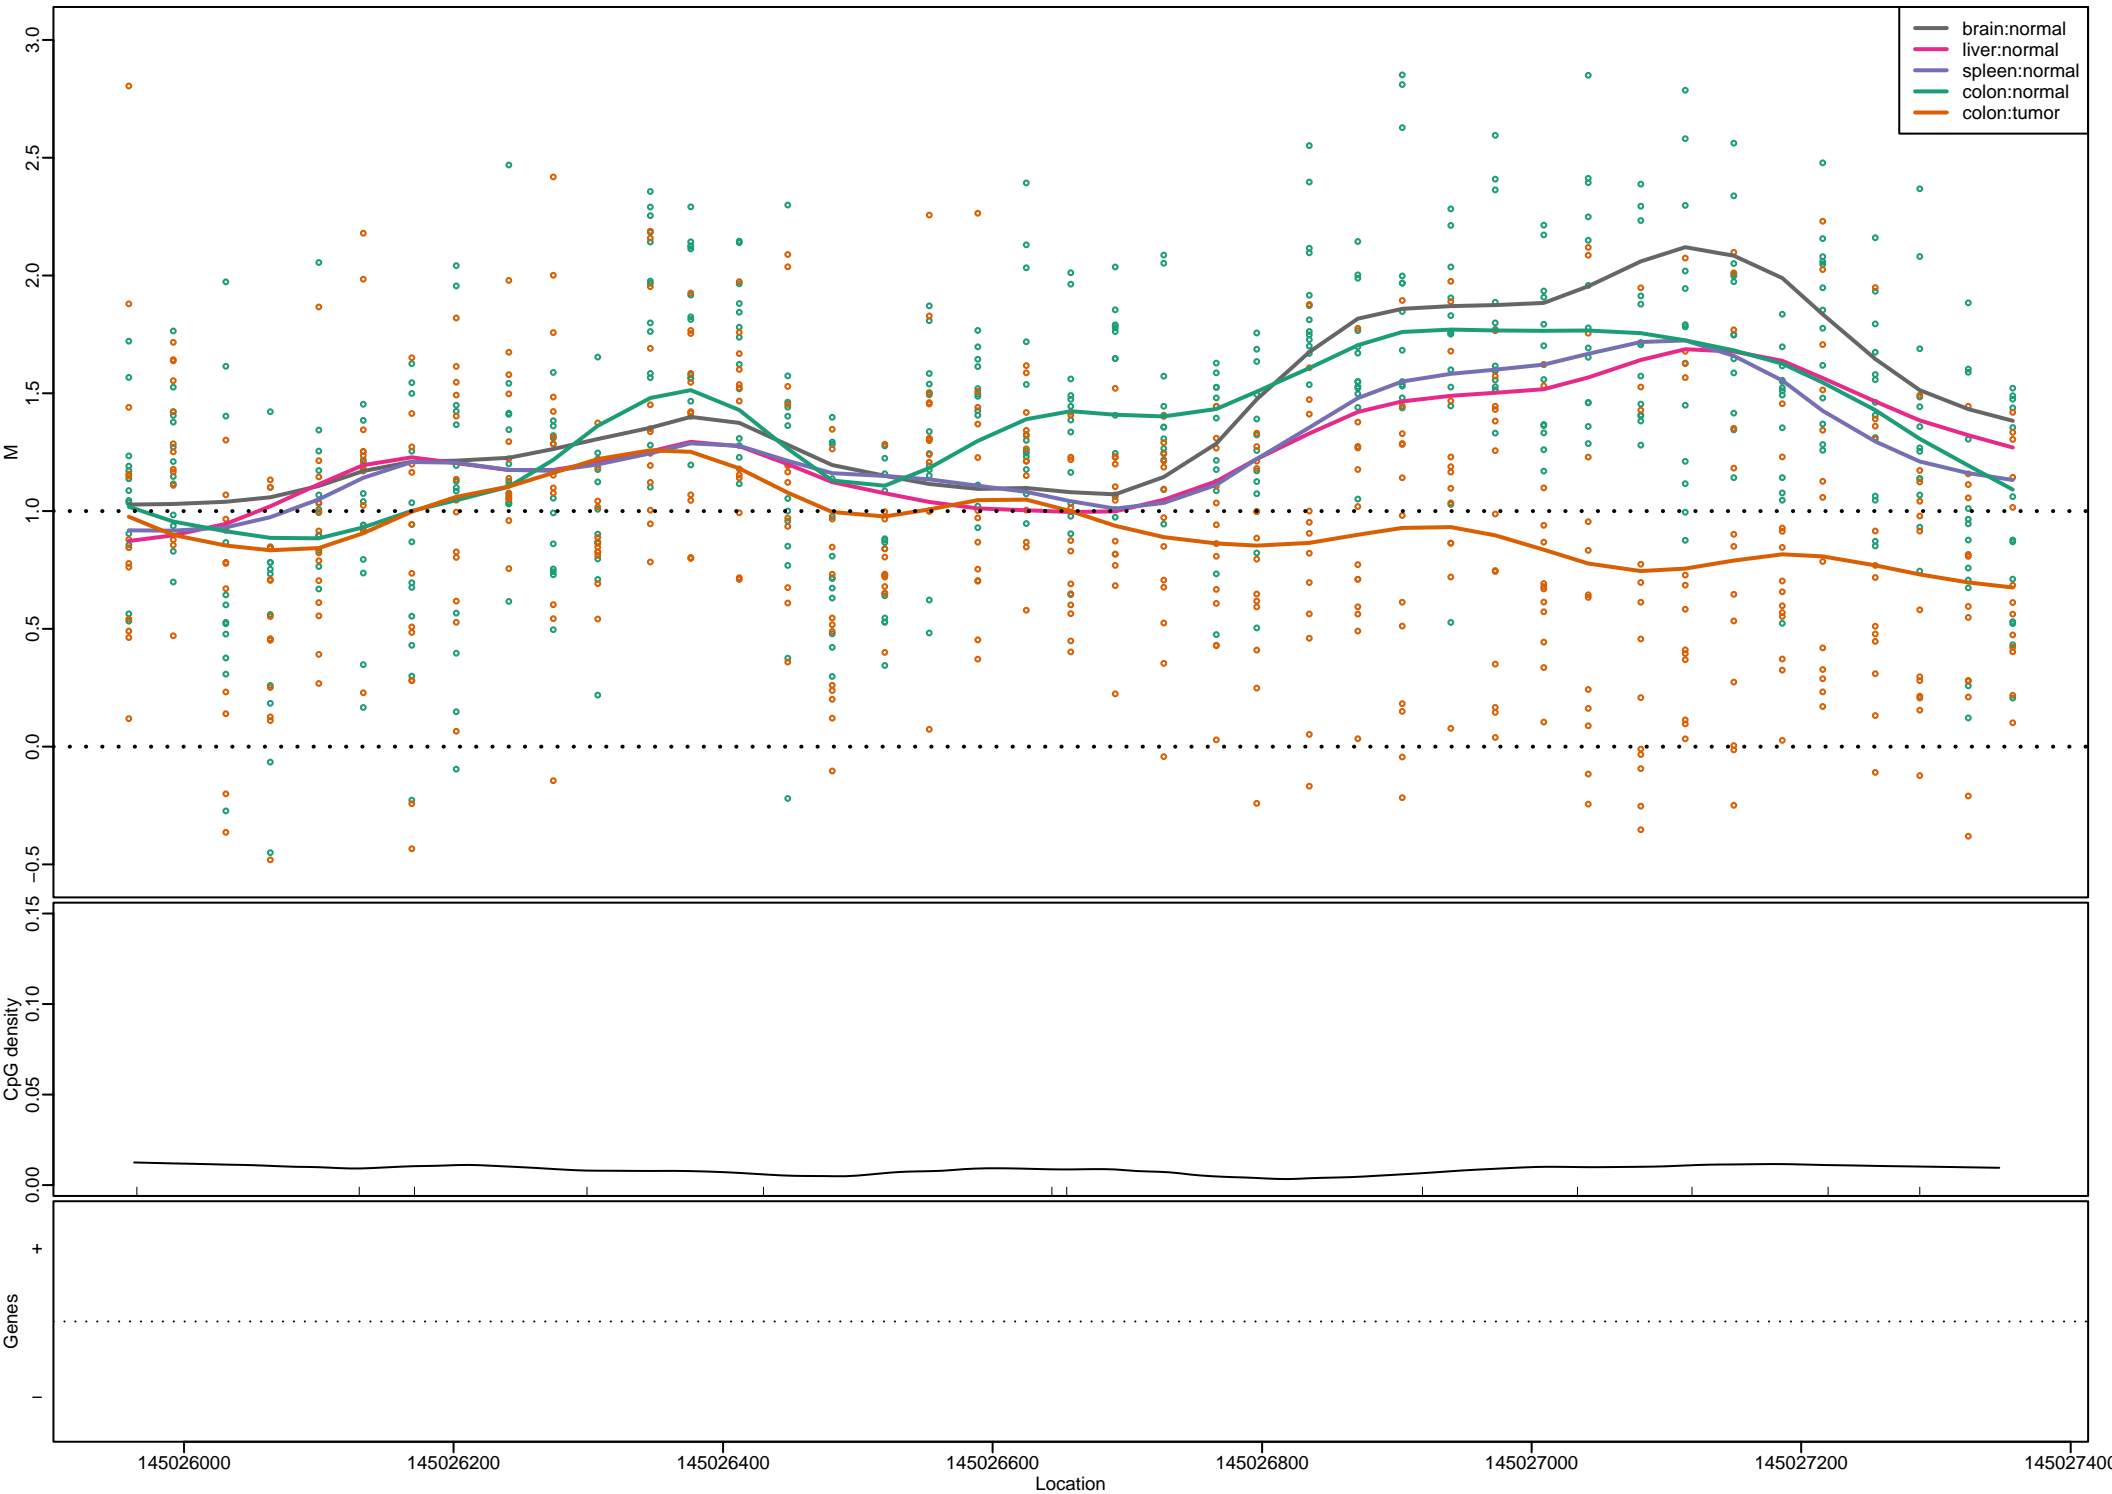

ID:47--chr11:73980533-73982242

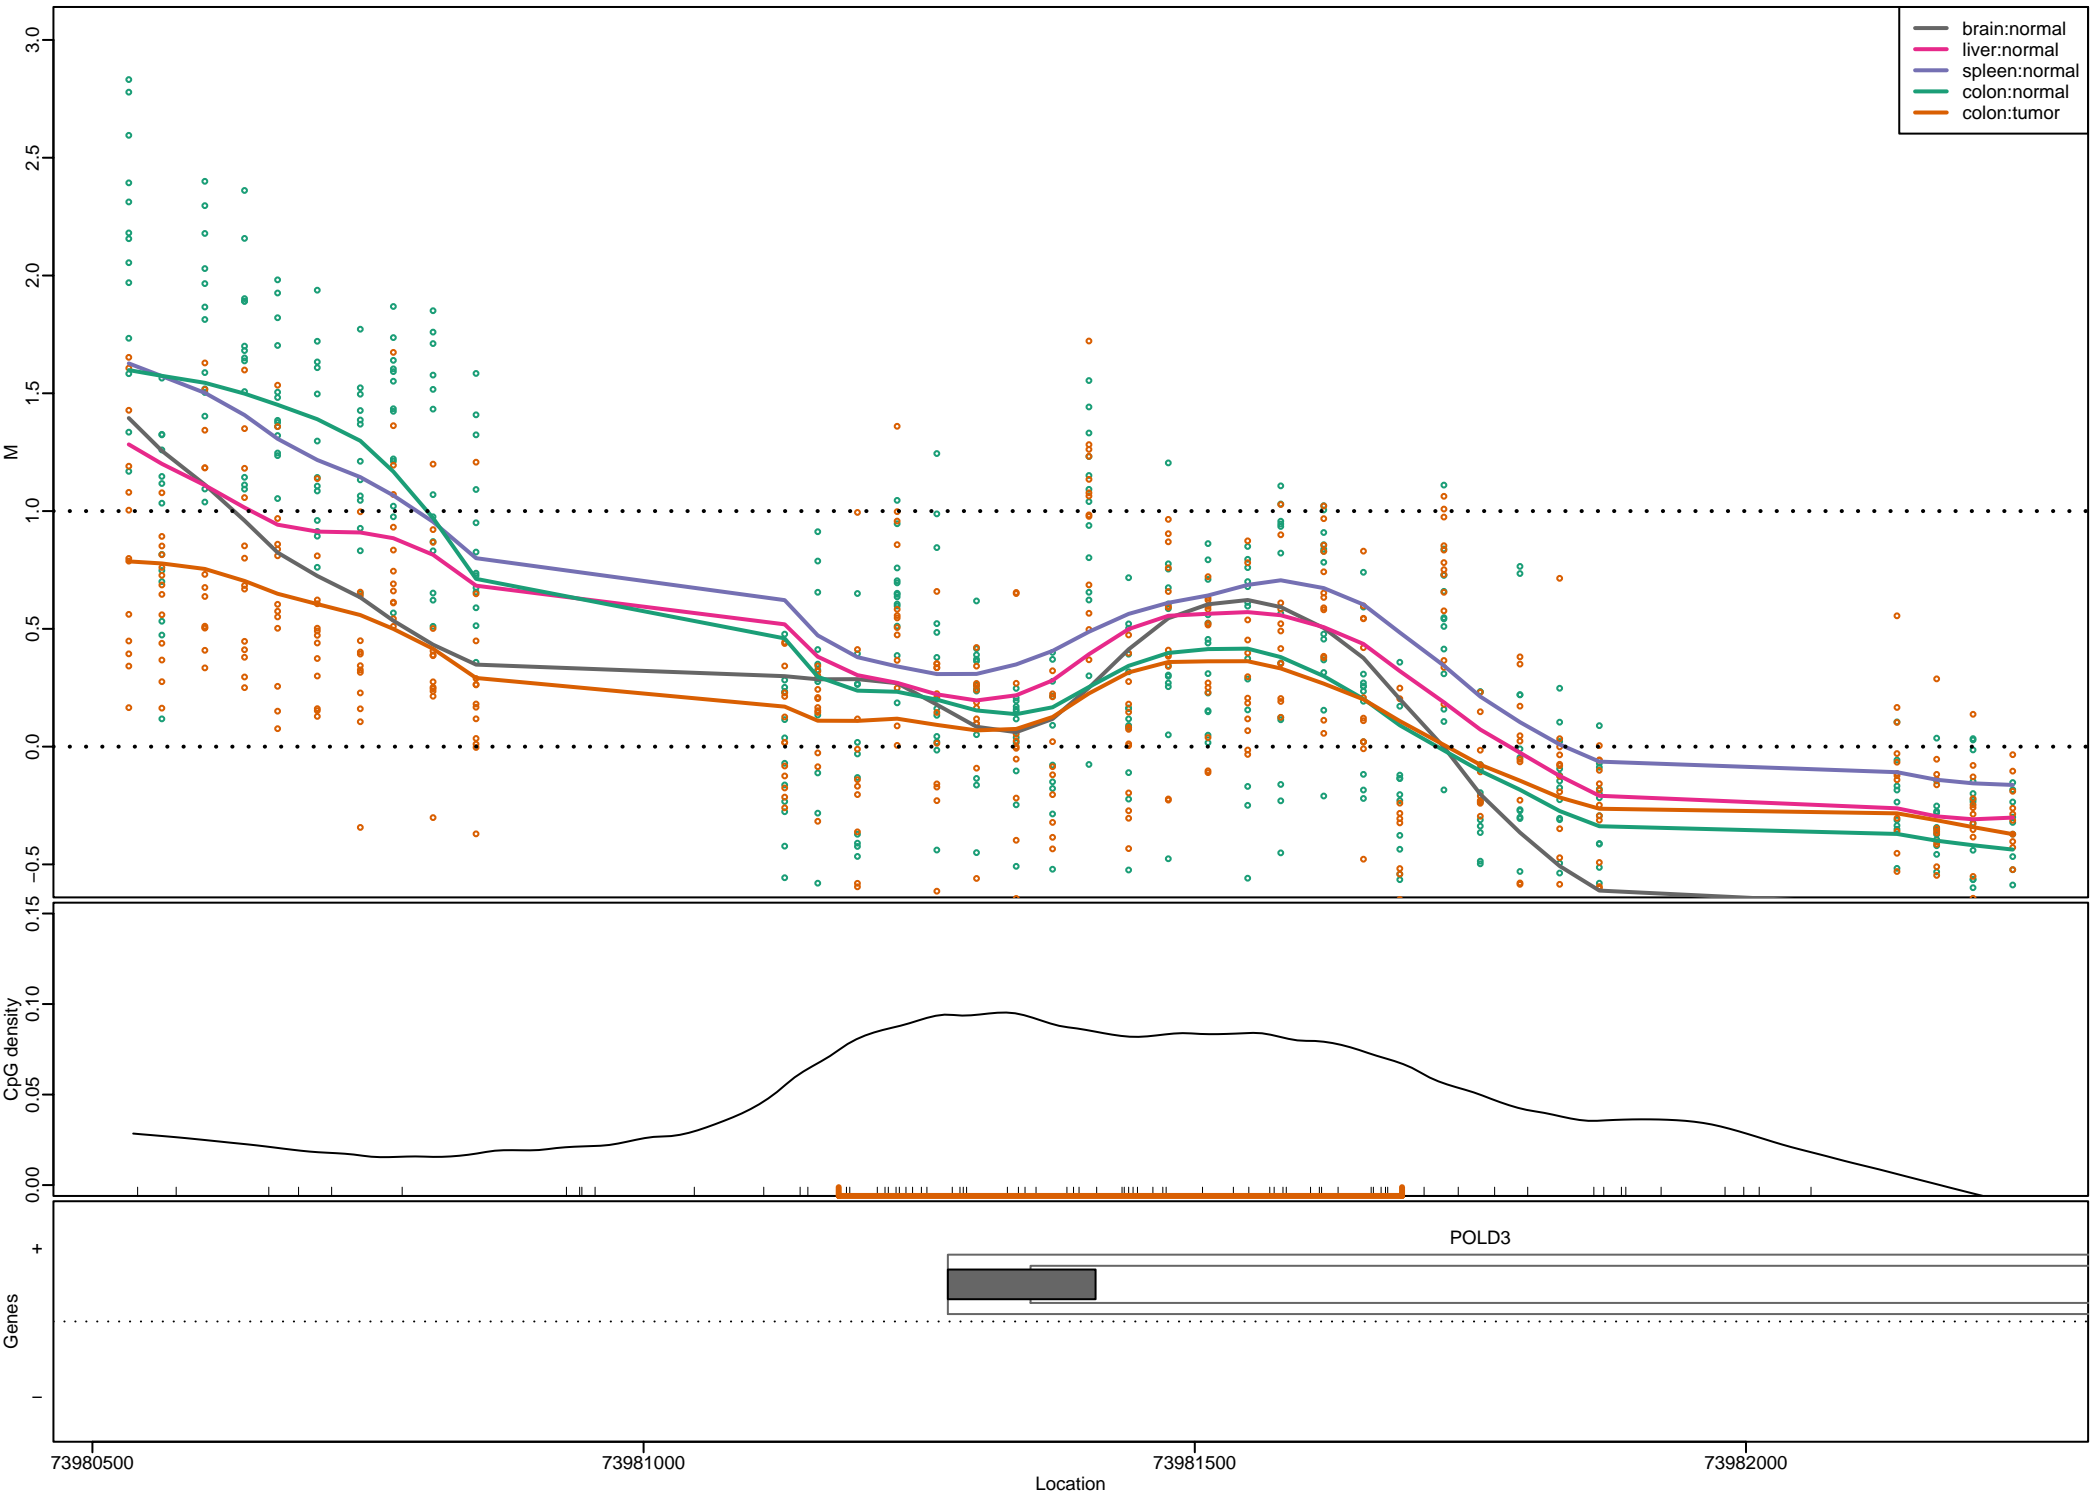



ID:48--chr5:16233662-16237056

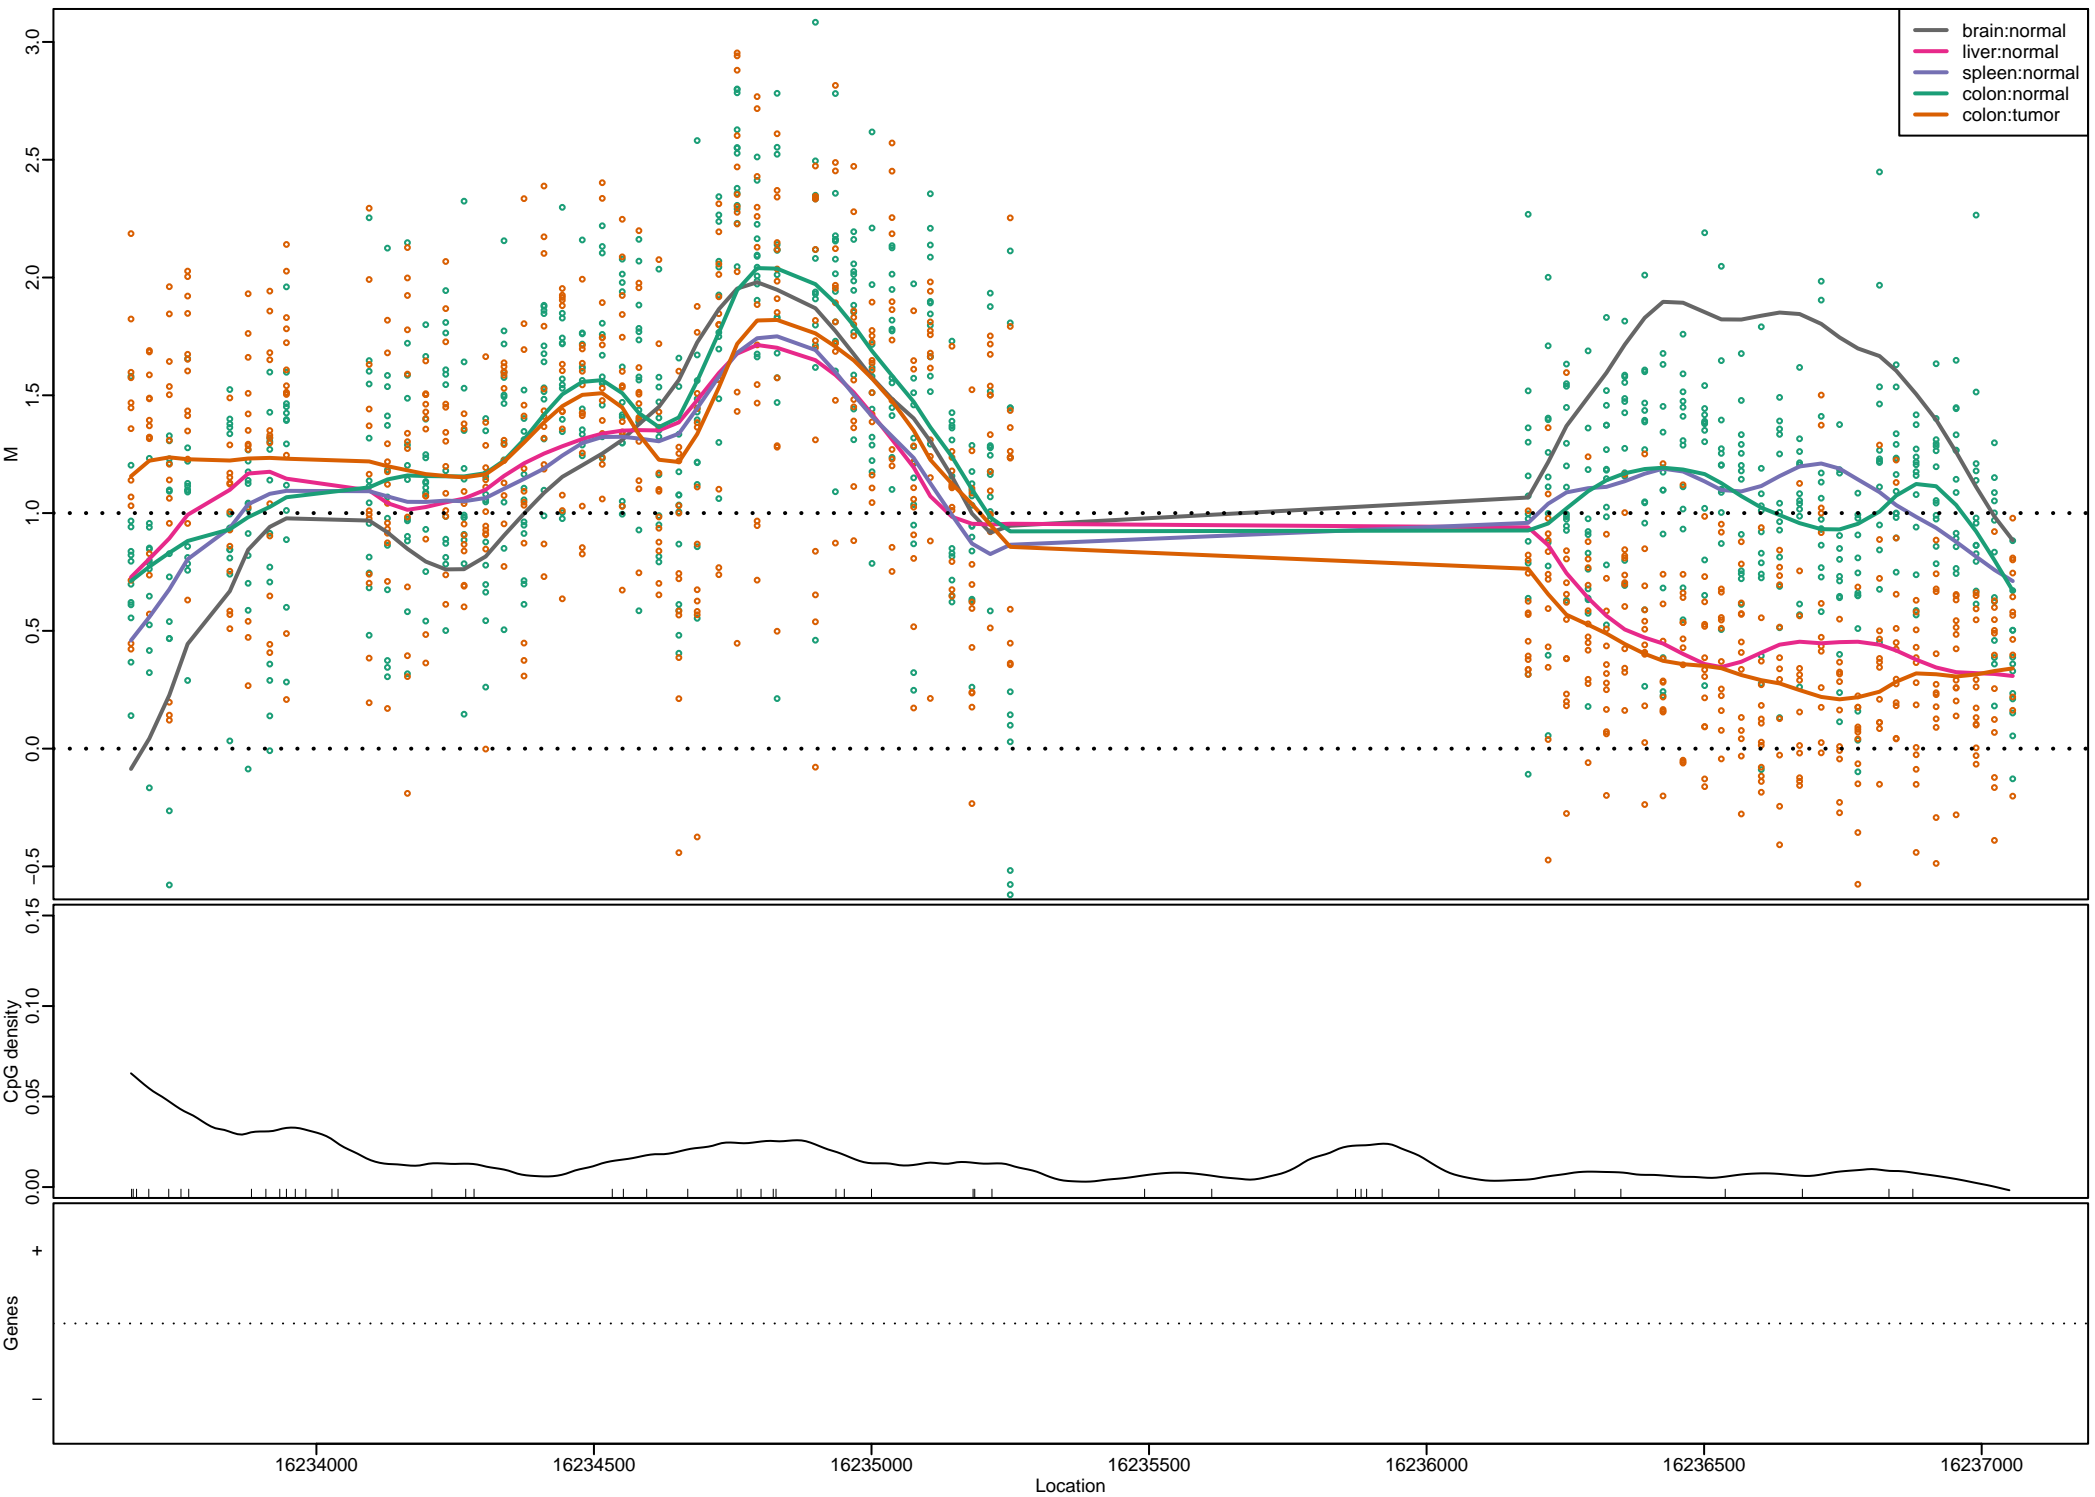

ID:49--chr9:137434871-137438143

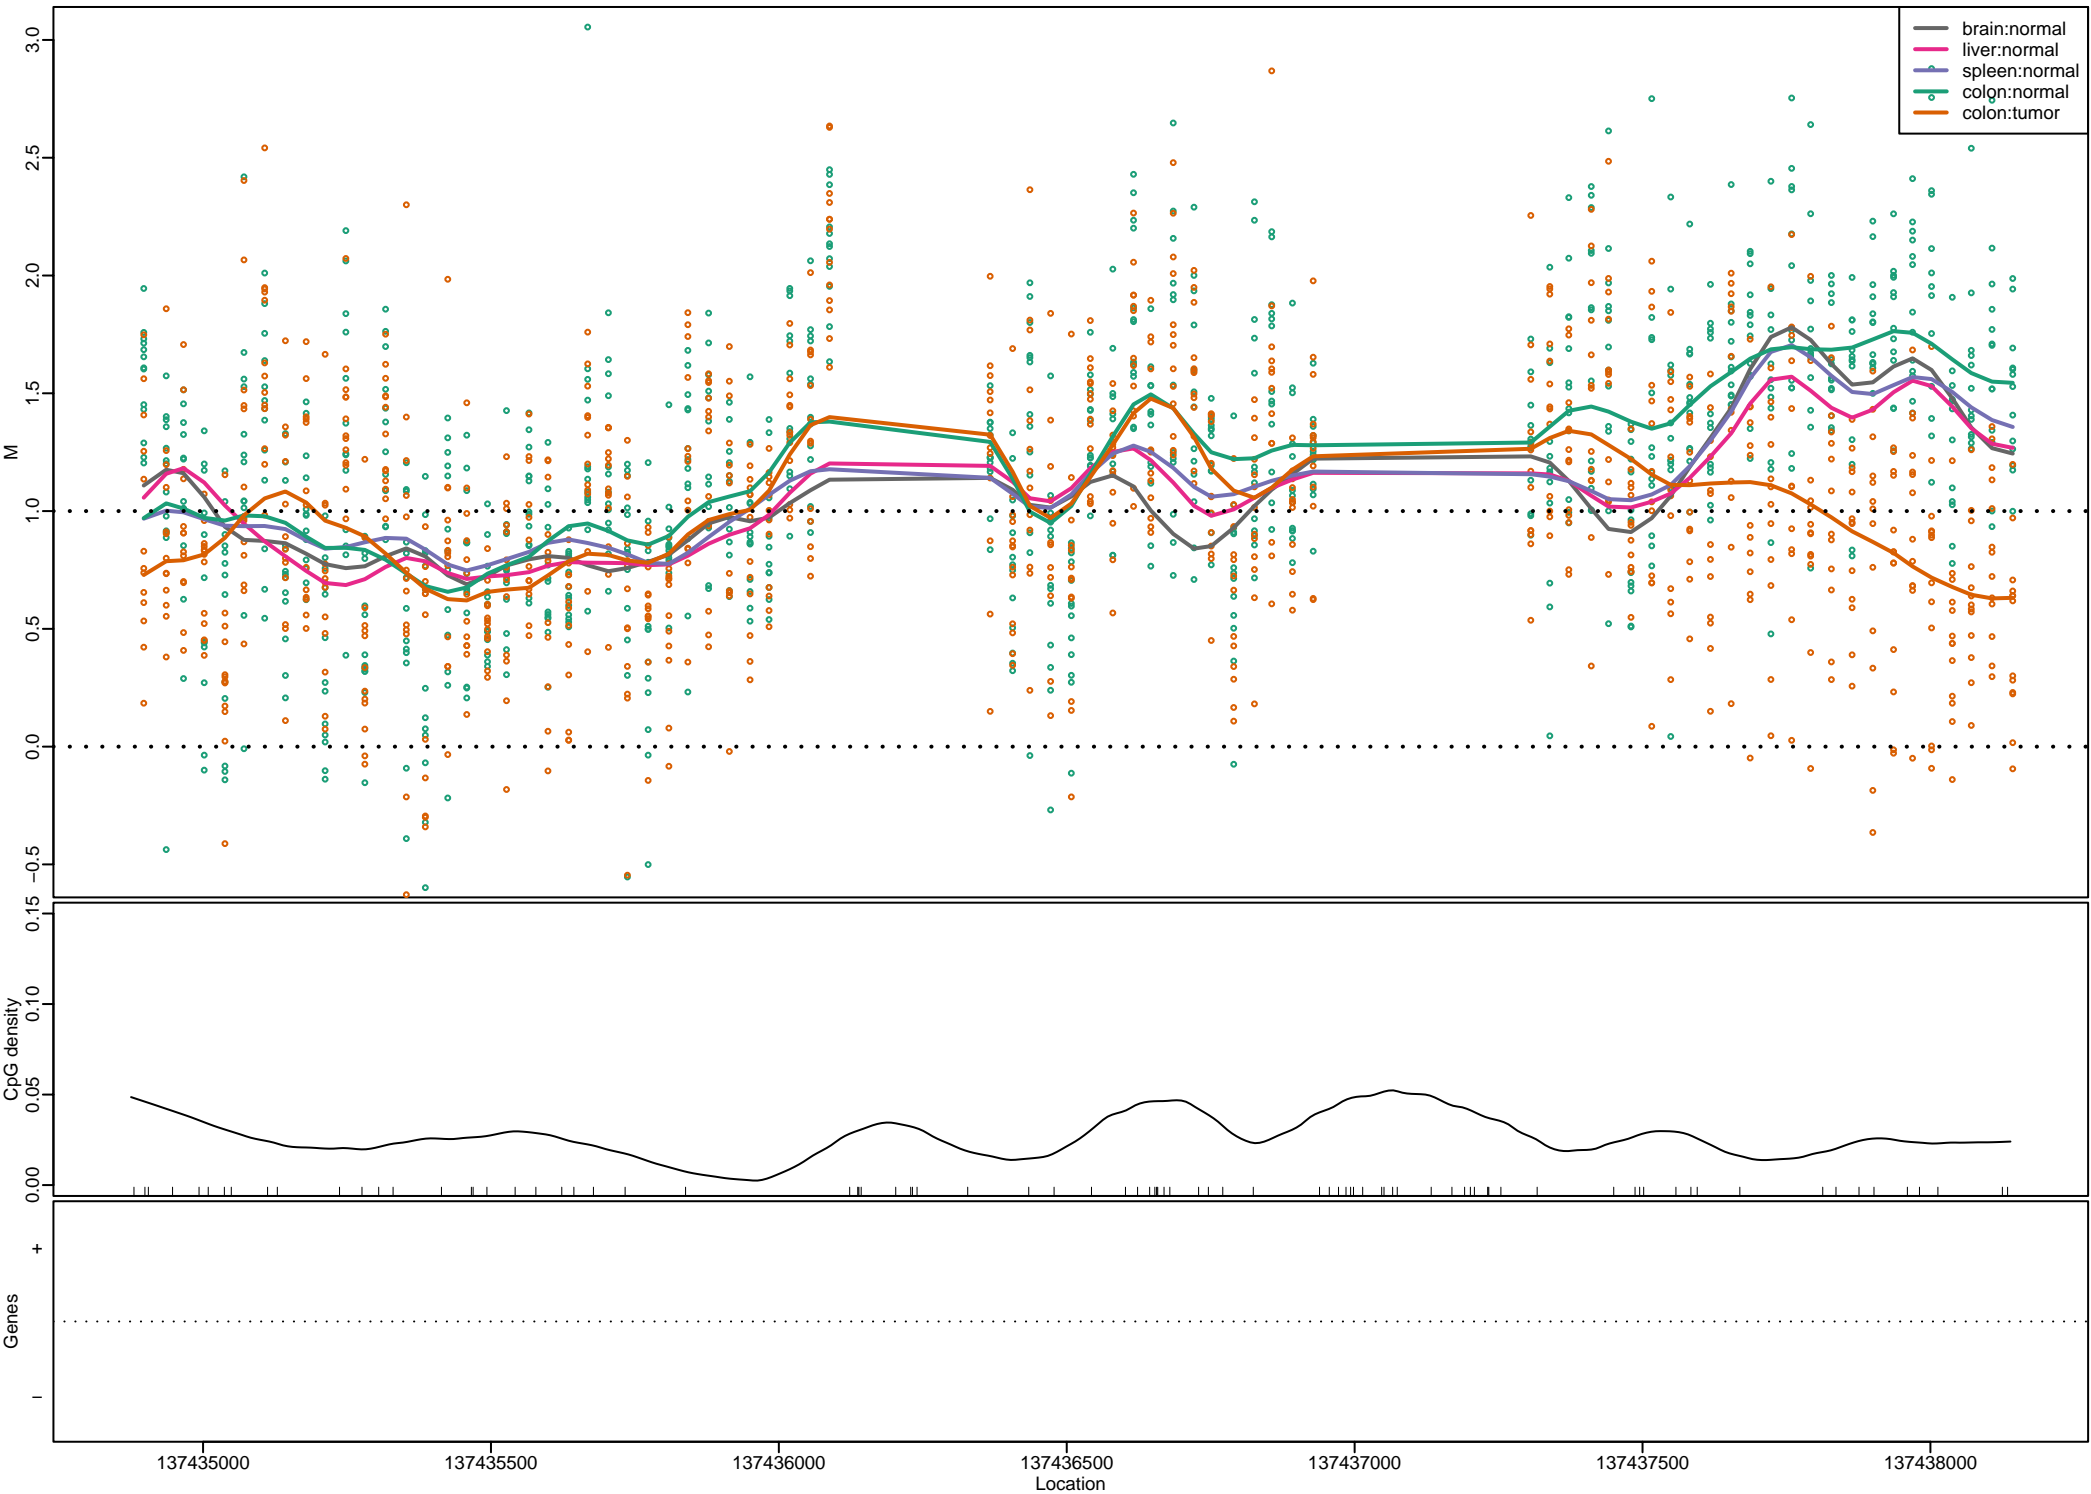

ID:50--chr8:17058919-17062867

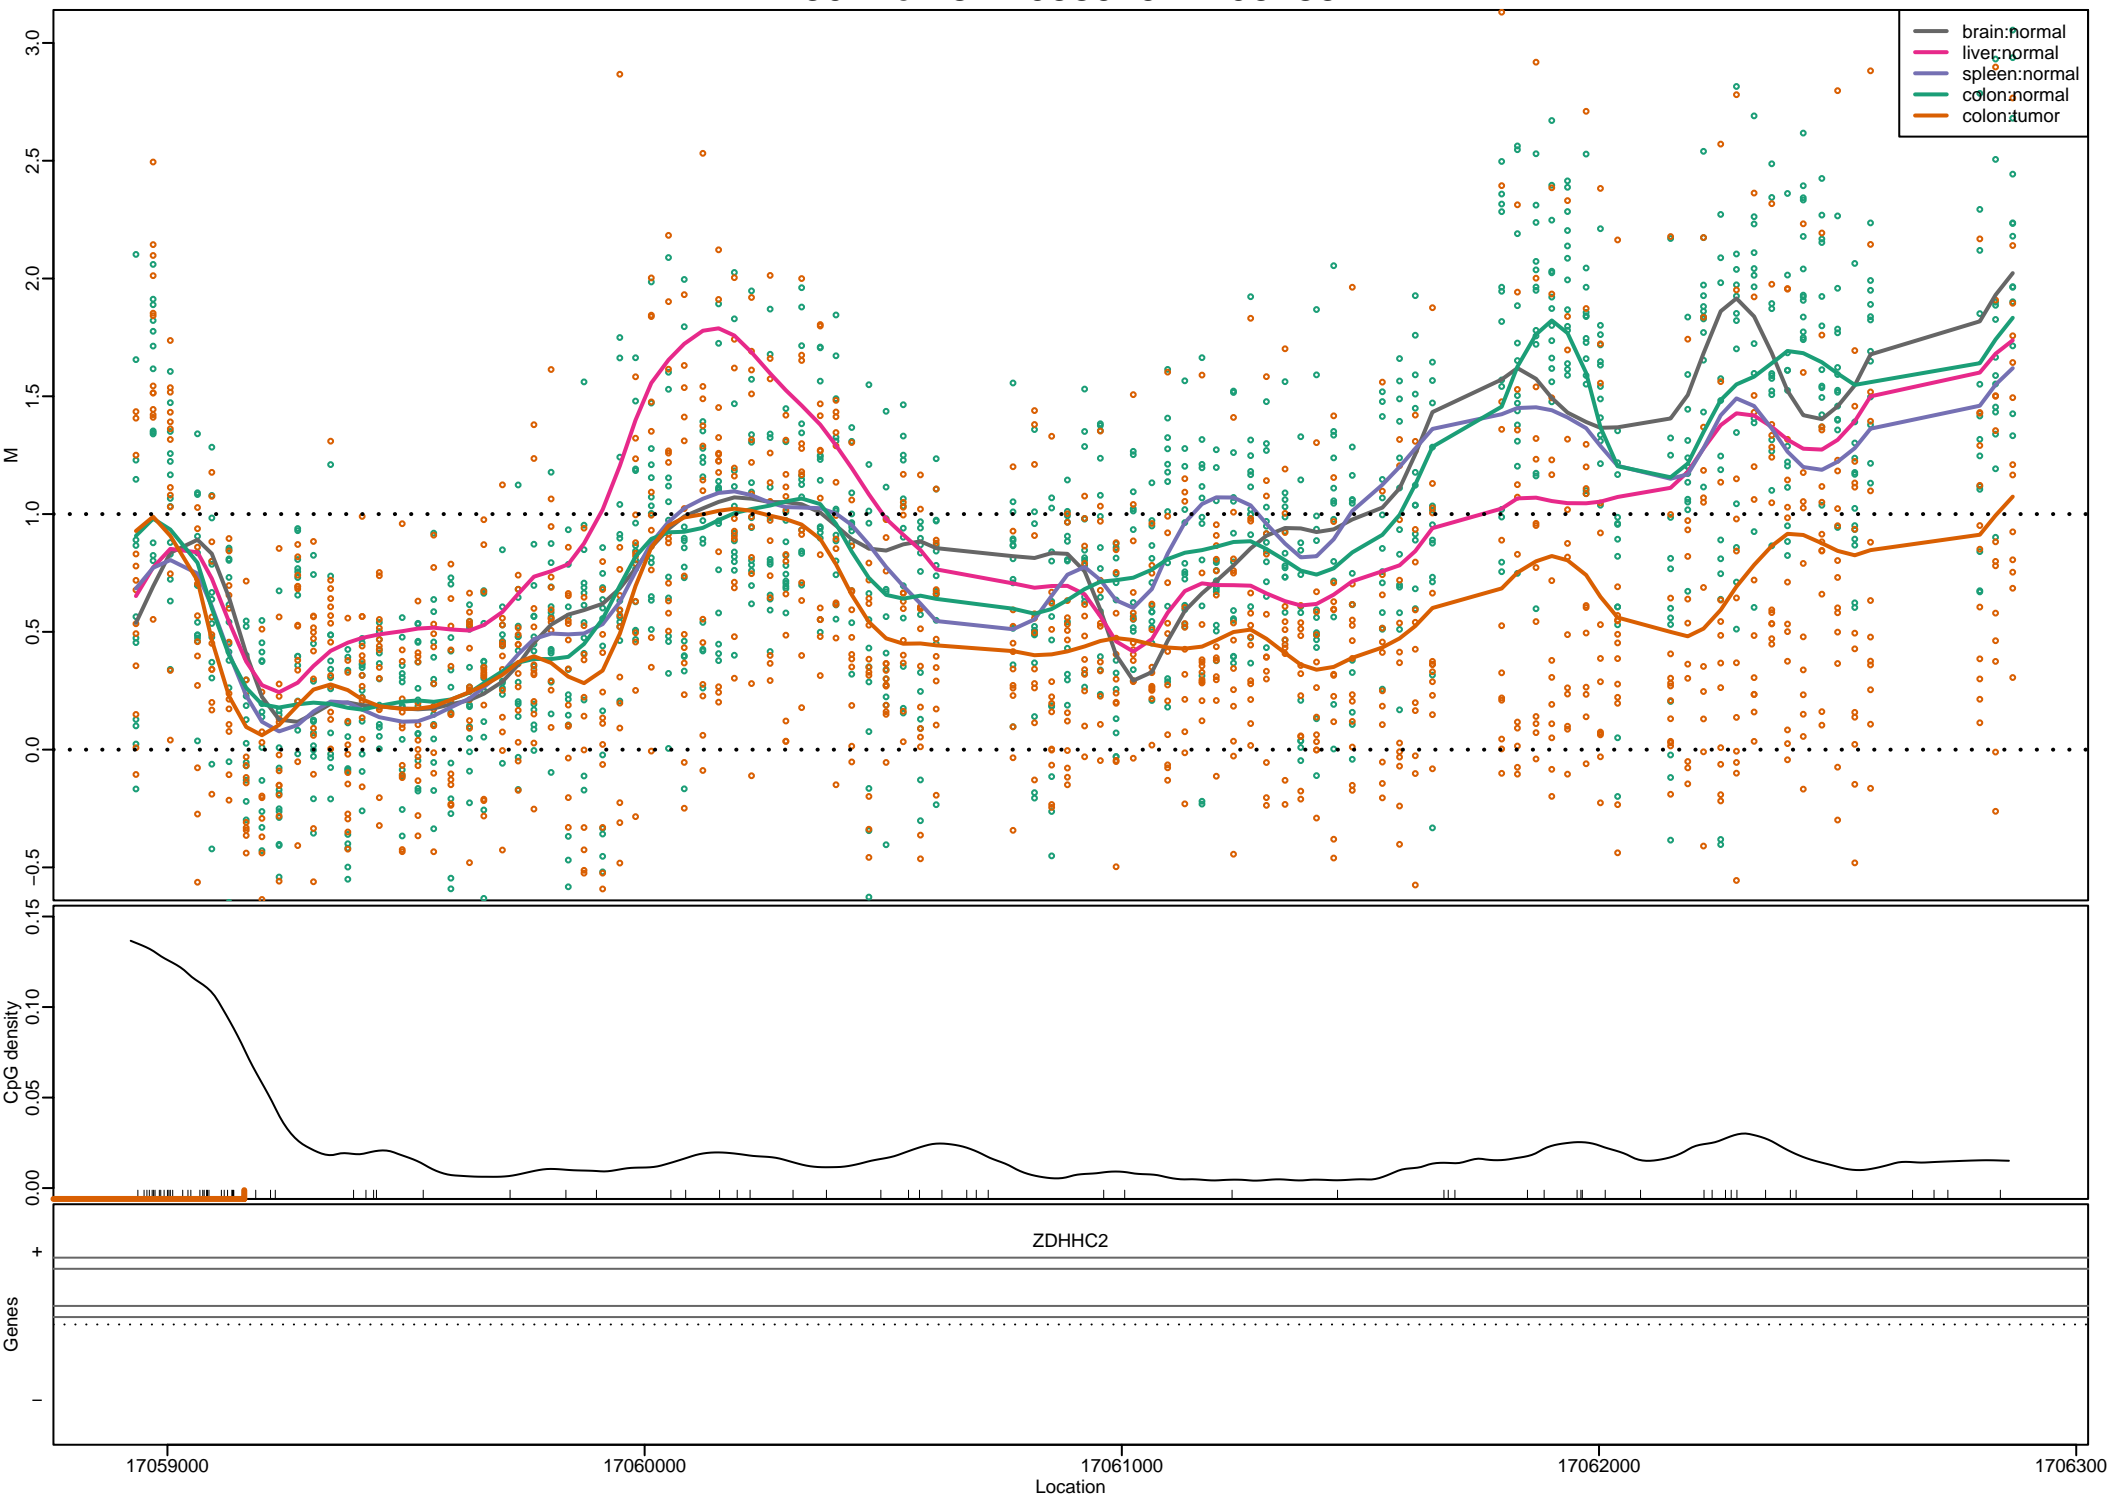

Supplement: NIHMS77908-supplement-3.pdf [file NIHMS77908-supplement-3.pdf]
