# Supplementary material
Source: PubMed Central journal article supplement (PMC2729128)
Supplement: NIHMS77908-supplement-1.pdf [file NIHMS77908-supplement-1.pdf]

# **Genome-wide methylation analysis of human colon cancer reveals similar hypo- and hypermethylation at conserved tissue-specific CpG island shores**

Rafael Irizarry<sup>1,2,\*†</sup>, Christine Ladd-Acosta<sup>2,3,\*</sup>, Bo Wen<sup>2,3</sup>, Zhijin Wu<sup>6</sup>, Carolina Montano<sup>2,3</sup>, Patrick Onyango<sup>2,3</sup>, Hengmi Cui<sup>2,3</sup>, Kevin Gabo<sup>2,3</sup>, Michael Rongione<sup>2,3</sup>, Maree Webster<sup>7</sup>, Hong Ji<sup>2,3</sup>, James Potash<sup>2,4</sup>, Sarven Sabunciyani<sup>2,5</sup> and Andrew P. Feinberg<sup>2,3,\*†</sup>

<sup>1</sup>Department of Biostatistics, Johns Hopkins Bloomberg School of Public Health, Baltimore, MD 21205, USA; <sup>2</sup>Center for Epigenetics, Institute for Basic Biomedical Sciences, and Departments of <sup>3</sup>Medicine, <sup>4</sup>Psychiatry, and <sup>5</sup>Pediatrics, Johns Hopkins University School of Medicine, Baltimore, MD 21205, USA; <sup>6</sup>Center for Statistical Sciences, Brown University, Providence, RI; <sup>7</sup>Stanley Laboratory of Brain Research, Uniform Services University of Health Sciences, Bethesda, MD 20892, USA

\*Equal contribution from these authors

†To whom correspondence should be addressed. Email: [rafa@jhu.edu](mailto:rafa@jhu.edu) and [afeinberg@jhu.edu](mailto:afeinberg@jhu.edu)

## **Supplementary Figures**

**This document contains the following Supplementary Figures:**

**Supplementary Figure 1**

**Supplementary Figure 3**

**Supplementary Figure 5**

**Supplementary Figure 6**

**Supplementary Figure 7**

**Supplementary Figure 8**

**Supplementary Figure 9**

**Supplementary Figures 2 and 4 have been uploaded as separate files (Supplementary Figure 2.pdf and Supplementary Figure 4.pdf) as Supplementary information because of their size, each containing 50 images.**

## Supplementary Figure 1

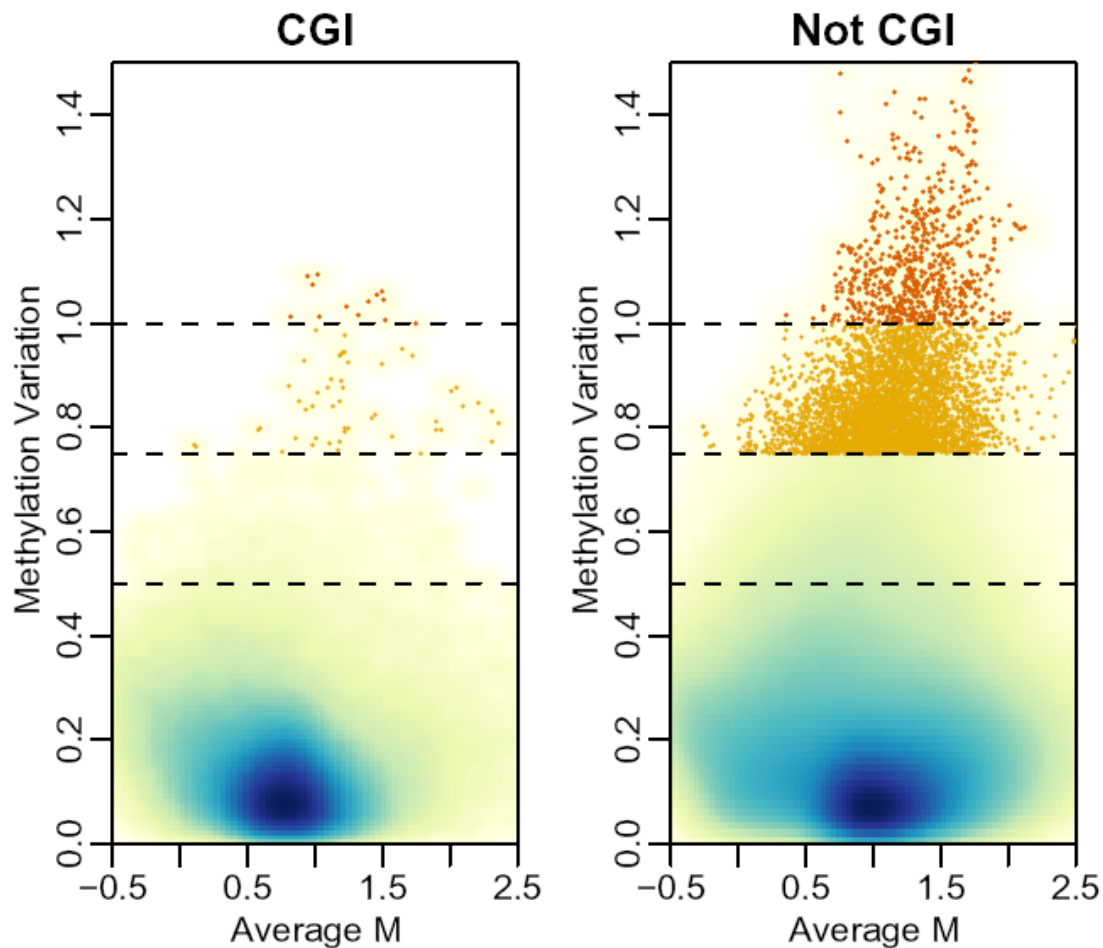

**Genome-wide DNAm analysis shows methylation variation is more common outside of CpG islands than within them.** We computed the average M value for four sets of normal brain, liver, spleen and colon. Methylation variation across tissues was determined using the standard deviation across tissues of within tissue-averaged M. For all CHARM probes located within a CGI, left plot, and all CHARM probes located outside of a CGI, right plot, we used a smooth scatter plot to represent distribution of values from high (blue) to low (yellow) number of points. Where tissue M variation was greater than 0.75 we used yellow points, and where greater than 1.0, orange points.

# Supplementary Figure 3

a

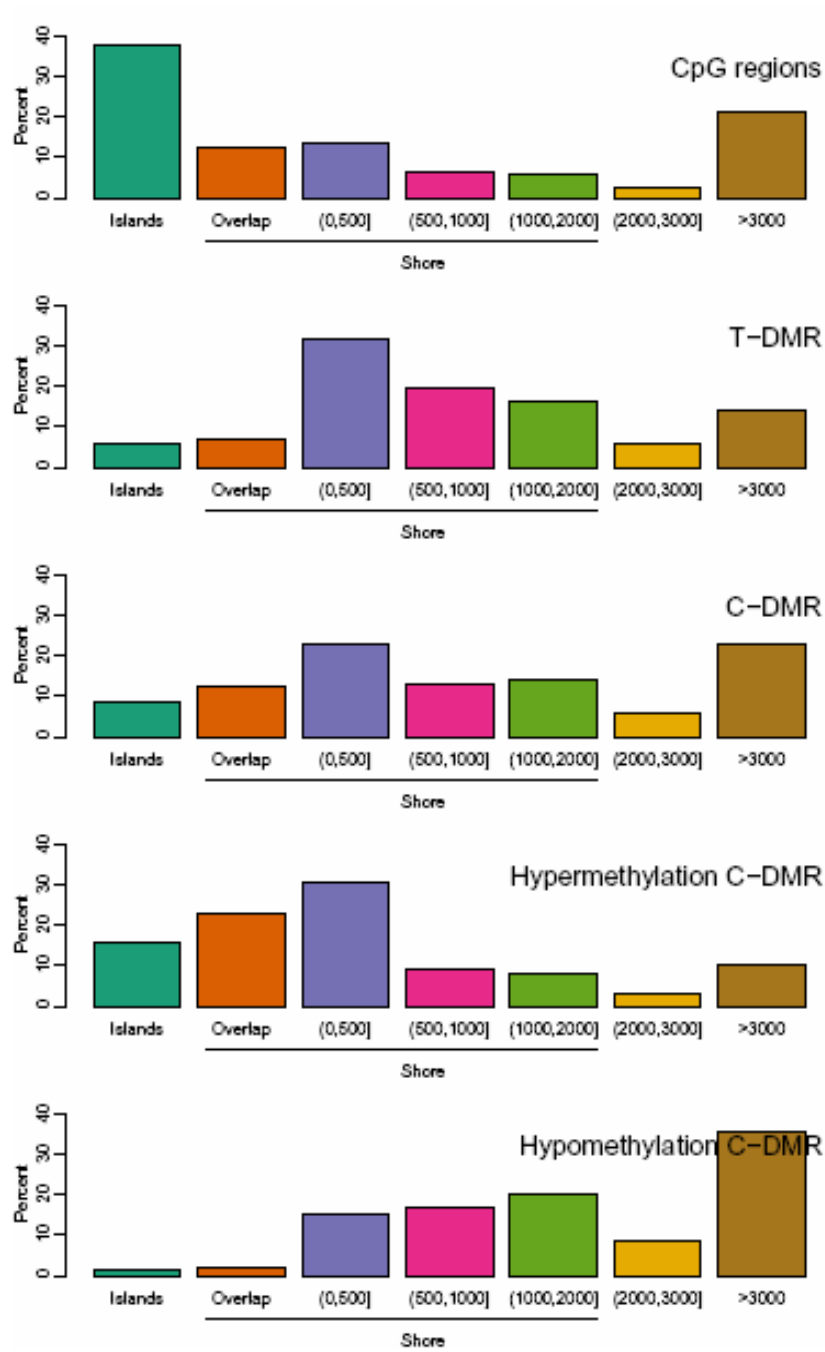

**b**

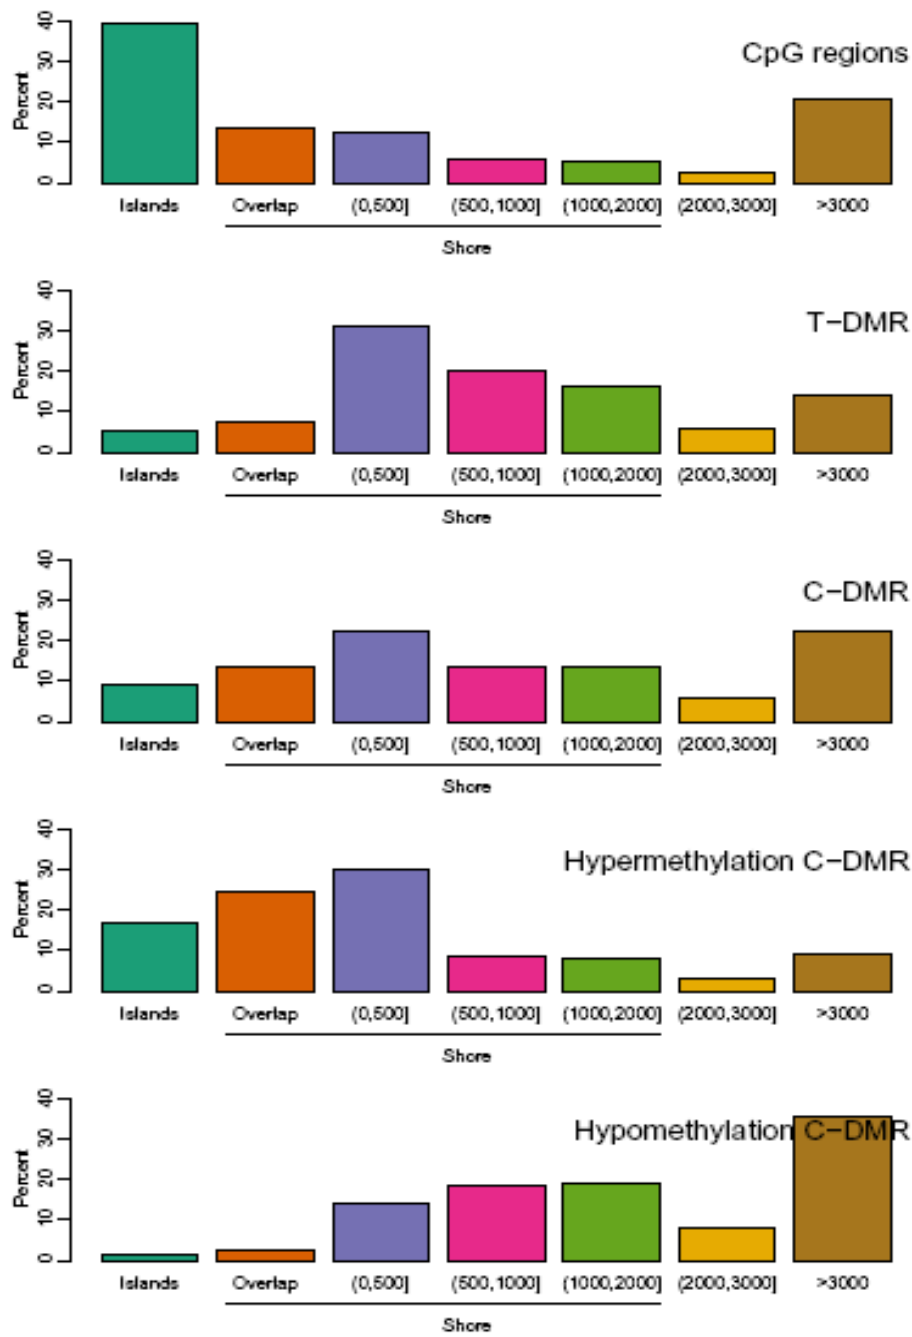

**c**

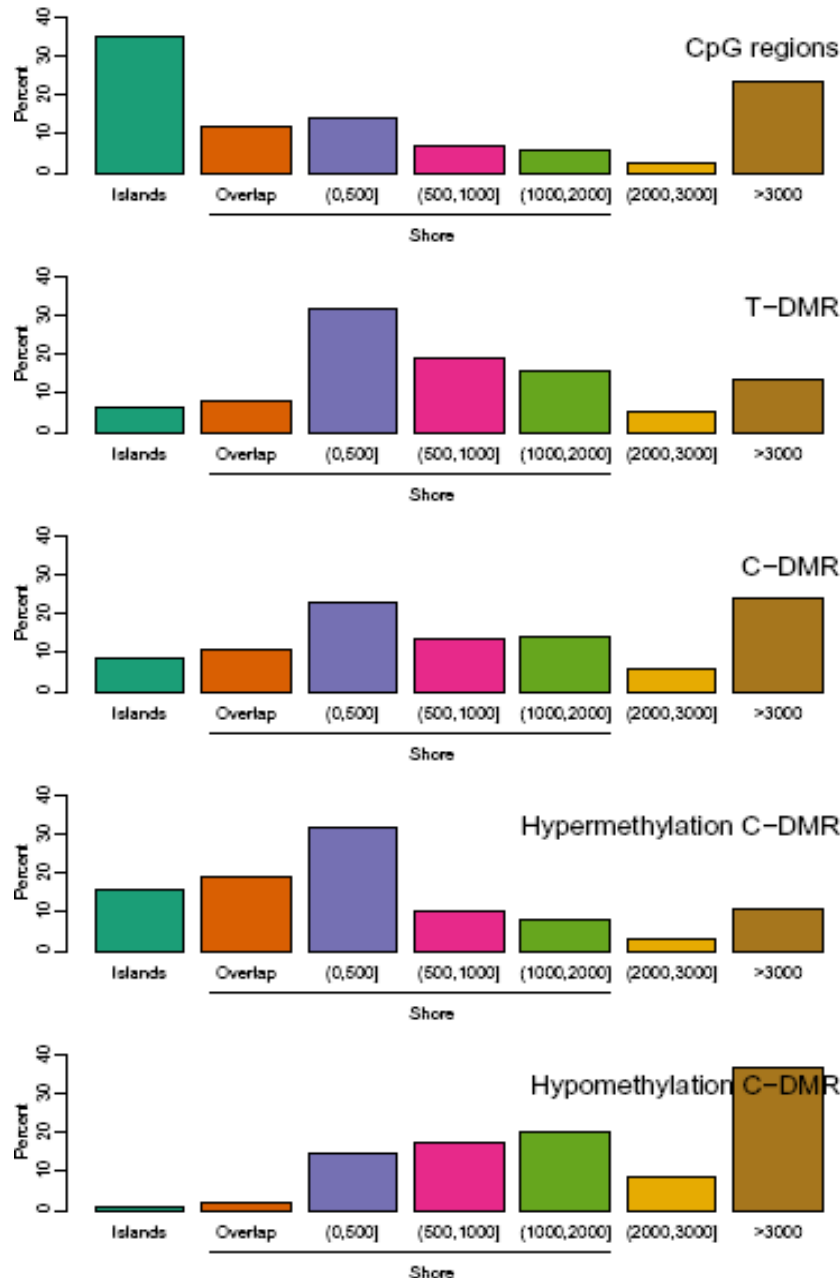

**Different FDR cutoffs do not substantively alter the distribution of distance of T-DMRs and C-DMRs from CpG islands.** (a) using an FDR cutoff of 0.01, (b) using an FDR cutoff of 0.05 (c) using an FDR cutoff of 0.10. *Islands* (teal) are regions which cover or overlap more than 50% of a CpG island. *Overlap* (orange) are regions which overlap 0.1-50% of a CpG island. *(0,500]* (purple) are regions which do not overlap islands but are located  $\leq 500$  bp of islands. *(500,1000]* (magenta) are regions located  $> 500$  and  $\leq 1000$  bp from an island. *(1000,2000]* (green) are regions  $> 1000$  bp and  $\leq 2000$  bp from an island. *(2000,3000]* (yellow) are regions located  $> 2000$  bp and  $\leq 3000$  bp from an island. Greater than 3000 (brown) are regions  $> 3000$  bp from an island. The percentage of each class is provided for CpG regions (the CHARM arrays themselves, null hypothesis), tissue-specific differentially methylated regions (T-DMRs), cancer-specific differentially methylated regions (C-DMRs), and the latter subdivided into regions of cancer-specific hypermethylation and hypomethylation.

## Supplementary Figure 5

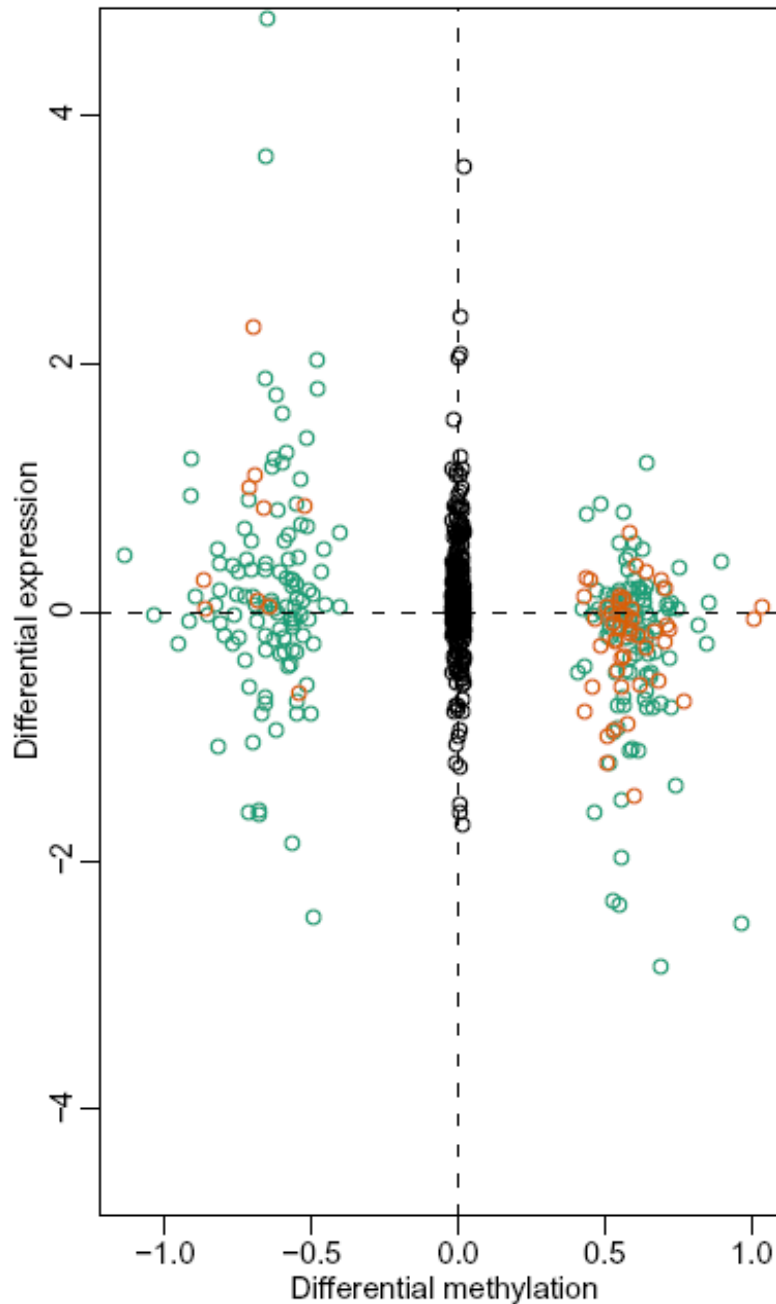

**Gene expression is strongly correlated with C-DMRs at CpG island shores.** For each colon tumor versus normal mucosa C-DMR we found the closest annotated gene on the Affymetrix HGU133A microarray, resulting in a total of 650 gene/C-DMR pairs. Plotted are log (base 2) ratios of colon tumor to normal expression against delta M values for colon tumor and normal DNAm. Orange dots represent C-DMRs located within 300 bp from the corresponding gene's transcriptional start site (TSS). Green dots represent C-DMRs that are located from 300-2000 bp from the TSS of an annotated gene. Black dots, in the middle, represent log ratios for all genes further than 2 kb from an annotated TSS.

# Supplementary Figure 6

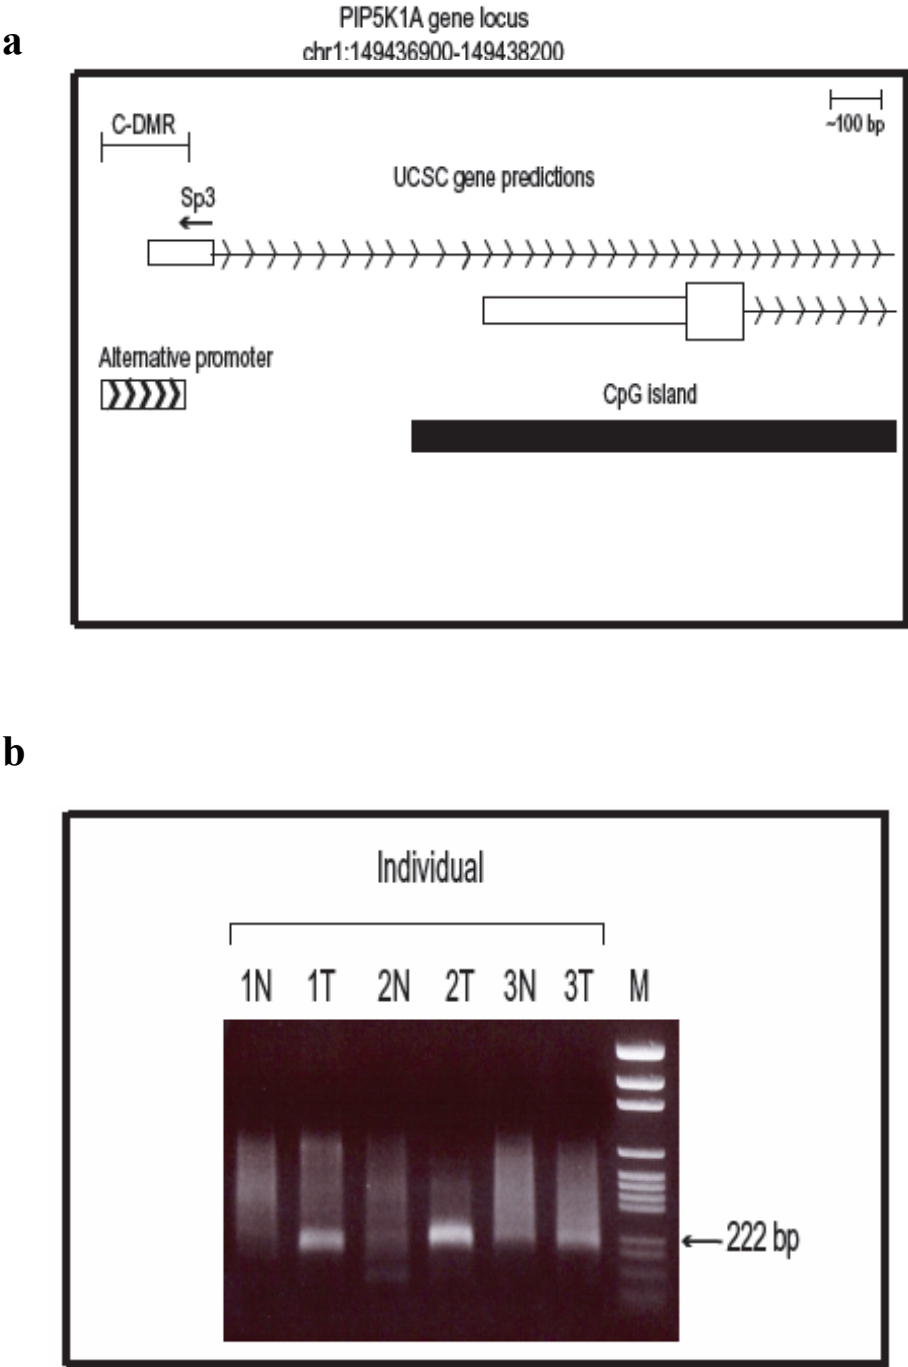

**Alternate gene transcription origin in colon tumors at a CpG island shore.** (a) schematic overview of the *PIP5K1A* gene locus. C-DMR represents the genomic region that is hypomethylated in colon tumors as compared to normals. (b) the arrow indicates a 220bp fragment present in 3 colon tumors but not normal mucosa from the same individual amplified by the Sp3 primer and the 5' RACE anchor primer.



## Supplementary Figure 7

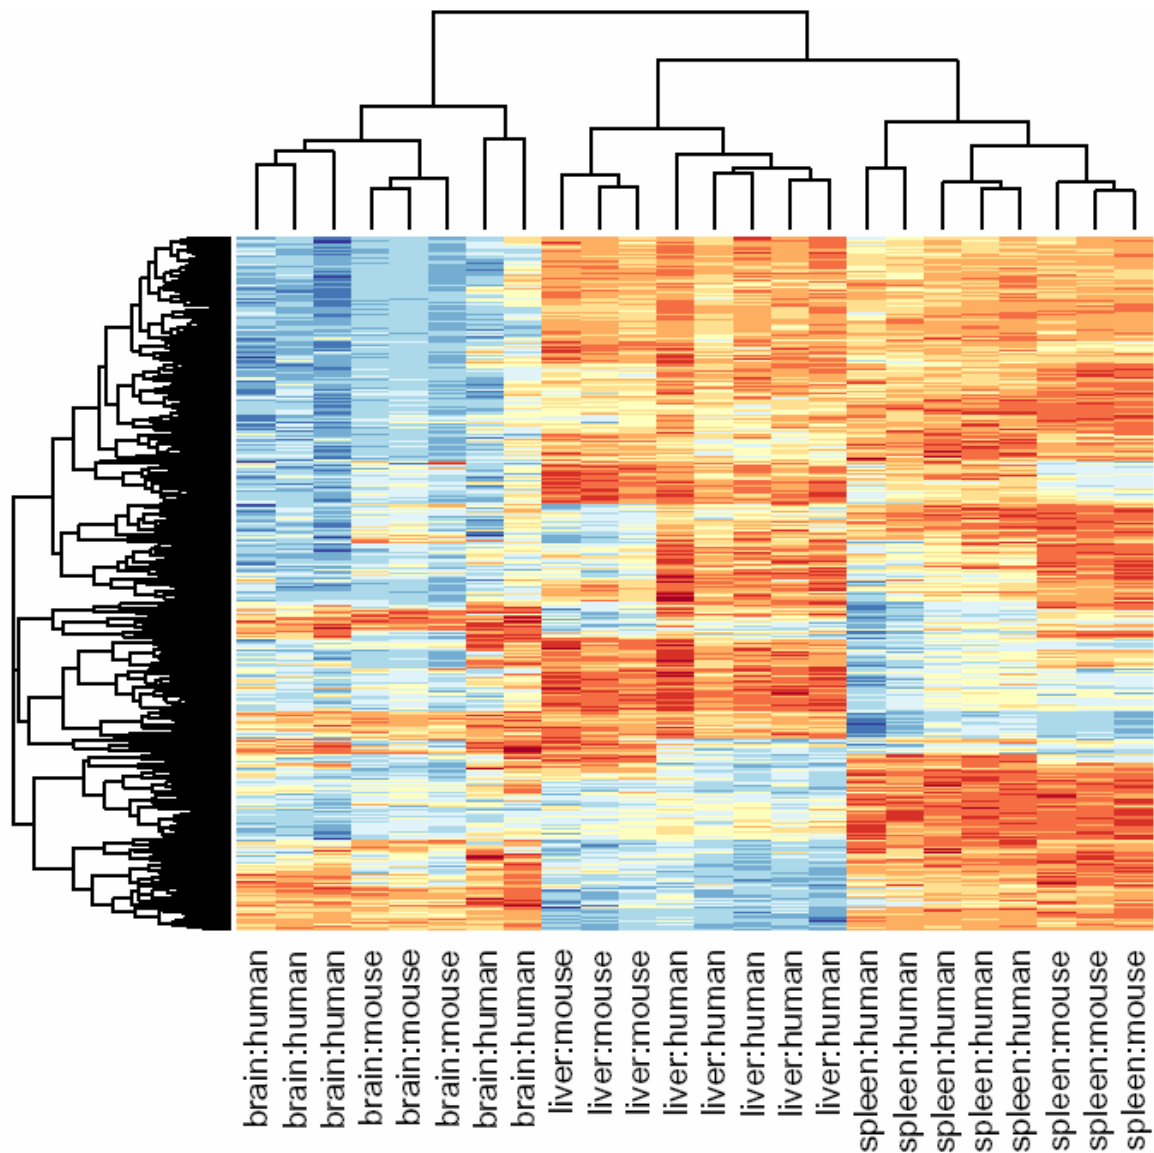

**Methylation of mouse T-DMRs completely discriminates tissues regardless of species of origin, even for T-DMRs > 2 kb from an annotated gene.** The  $M$  values of all tissues from the 957 regions corresponding to mouse T-DMRs that mapped to the human genome and were greater than 2 kb from an annotated gene were used for unsupervised hierarchical clustering. By definition, the mouse tissues are segregated. Surprisingly, all of the human tissues are also completely discriminated by the regions that differ in mouse tissues. The three major branches in the dendrograms correspond perfectly to tissue type regardless of species. Columns represent individual samples, and rows represent regions corresponding to mouse T-DMRs. The heatmap displays  $M$  values, with red being more methylated and blue less.

## Supplementary Figure 8

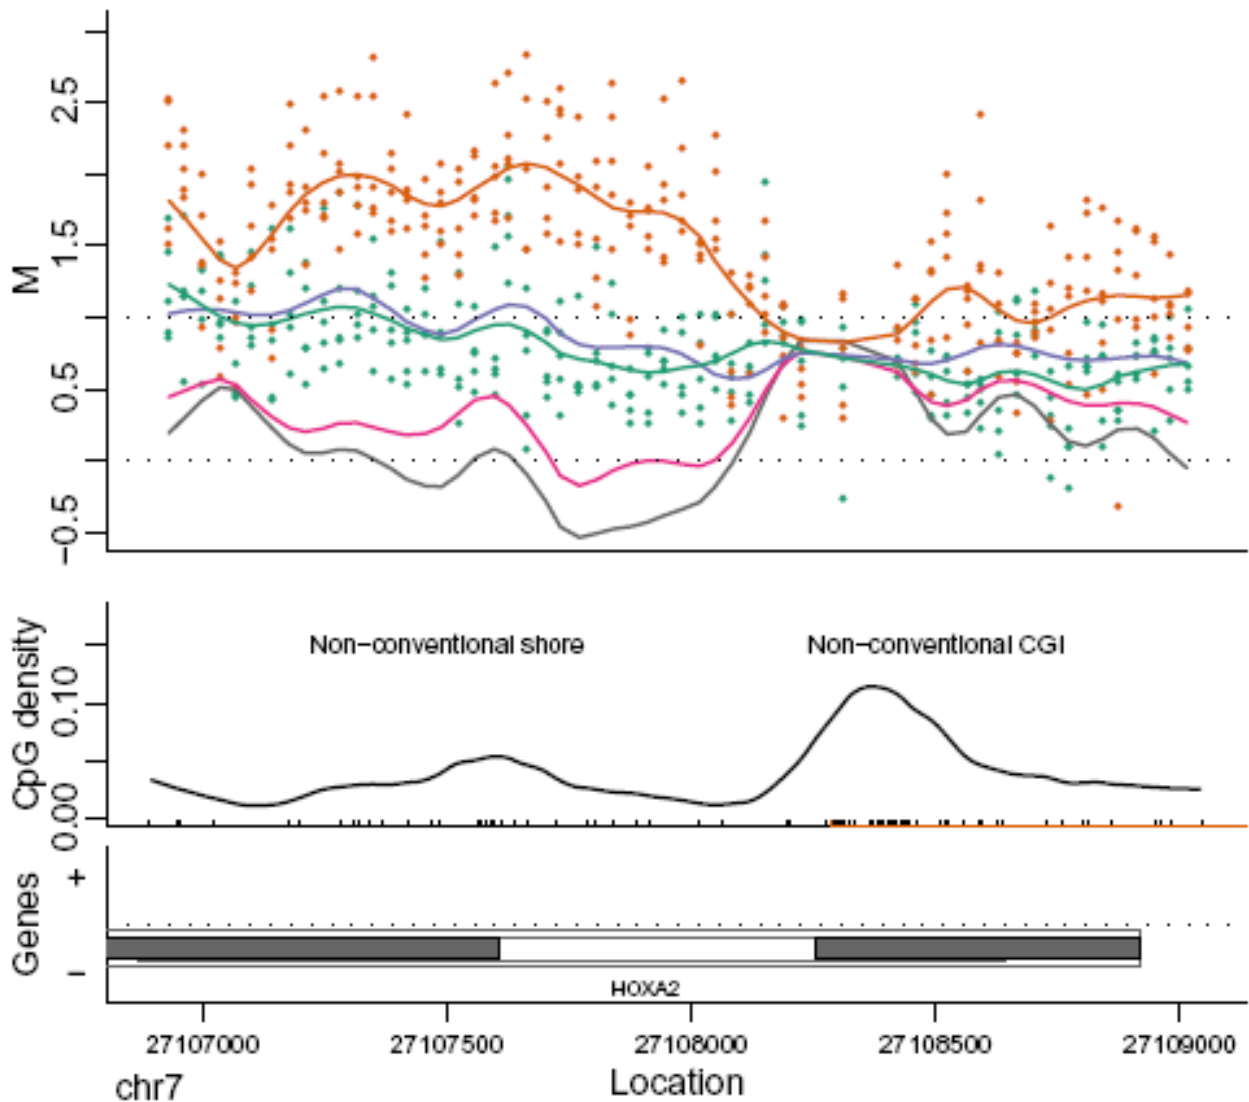

**Example of non-conventional CpG island. A C-DMR that is not adjacent to a conventionally defined CpG island.** Upper panel: plot of M value versus genomic location for brain (grey), liver (pink), spleen (purple), normal colon (green), colon tumor (orange). Each point represents the methylation level of an individual sample for each probe across the region. The smoothed line represents averaged, smoothed M values for each tissue, described in detail in the methods. M values which range from -0.5 to 0.5 represent unmethylated points and values from 0.5 to 1.5 represent baseline levels of methylation due to the scale and standardization used. The middle panel provides the location of CpG dinucleotides with black tick marks on the x-axis. CpG density was calculated across this region using a standard density estimator and is represented by the smoothed black line. The location of non-conventional CpG islands, defined using Hidden Markov modeling, is denoted on the x-axis as an orange line. The lower panel provides gene annotation for the genomic region. The thin outer grey line represents the start of transcription, the thin inner lines represent the start and end of a coding region. Filled in grey boxes represent exons. On the y-axis, plus and minus marks denote sense and antisense gene transcription respectively.

### Supplementary Figure 9

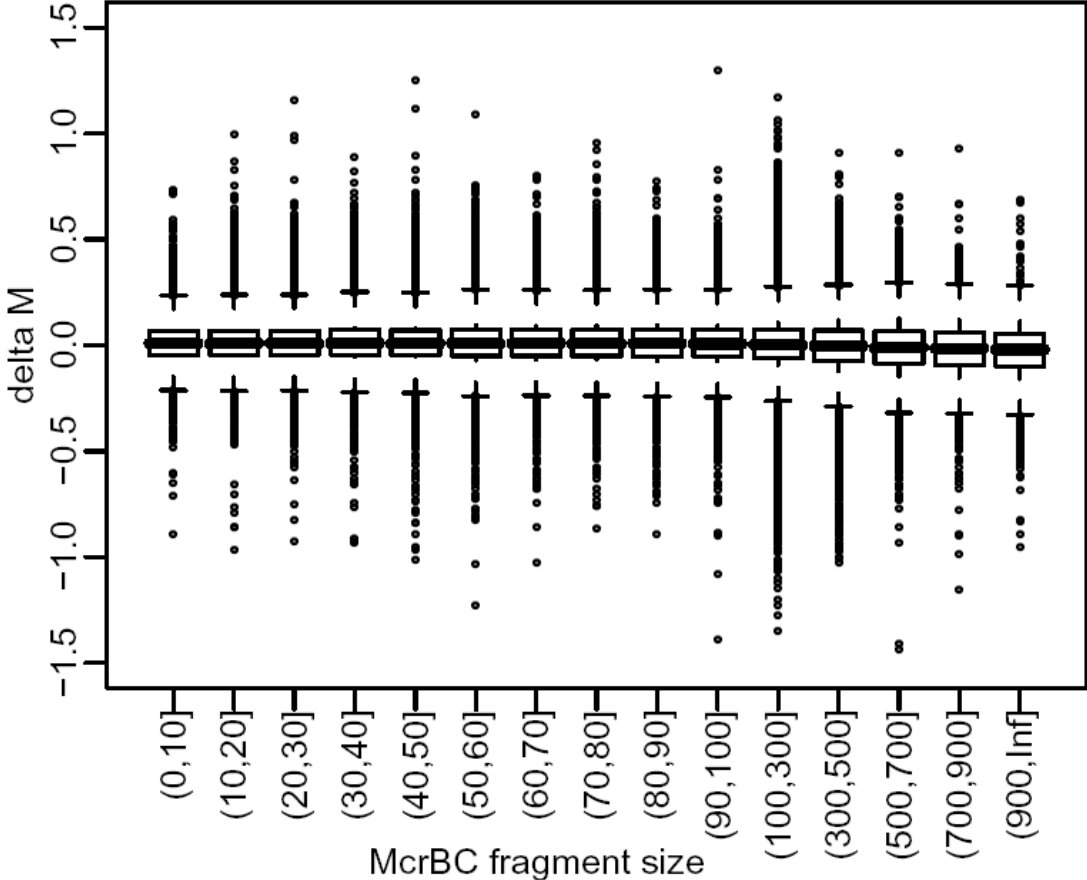

**Fragment size has no effect on  $\Delta M$ .** For each probe we computed the expected DNA fragment size based on McrBC recognition sites. We then stratified the delta M values for each probe from the colon tumor and normal mucosa comparison by fragment size. The box-plots show delta M values.

## **Supplementary Tables**

**This document contains the following Supplementary Tables:**

**Supplementary Table 1**

**Supplementary Table 2**

**Supplementary Table 3**

**Supplementary Table 4**

**Supplementary Table 5**

**Supplementary Table 6**

**Supplementary Table 7**

**Supplementary Table 8**

**Supplementary Table 9**

**Supplementary Table 1. Bisulfite pyrosequencing confirms differential DNA methylation at CpG island shores but not the associated island.**

| Gene         | Location <sup>a</sup> | Region | Tissue <sup>b</sup> | CG1   | CG2   | CG3   | CG4   | CG5   | CG6   | CG7   | CG8   | CG9   | CG10  | CG11  | CG12  | CG13  | CG14  | CG15  | CG16  | CG17  | CG18  |       |  |
|--------------|-----------------------|--------|---------------------|-------|-------|-------|-------|-------|-------|-------|-------|-------|-------|-------|-------|-------|-------|-------|-------|-------|-------|-------|--|
| <i>PCDH9</i> | +3,338                | Shore  | Brain               | 32    | 26    | 12    | 39    | 19    | 22    |       |       |       |       |       |       |       |       |       |       |       |       |       |  |
|              |                       |        | Spleen              | 91    | 71    | 31    | 76    | 66    | 60    |       |       |       |       |       |       |       |       |       |       |       |       |       |  |
|              |                       |        | <i>P</i> value      | <.001 | <.001 | <.001 | <.001 | <.001 | 0.003 |       |       |       |       |       |       |       |       |       |       |       |       |       |  |
|              | -267                  | Island | Brain               | 2     | 3     | 4     | 2     | 3     | 5     | 2     | 3     | 2     | 3     | 3     | 3     | 5     | 5     | 4     | 3     | 3     | 4     |       |  |
|              |                       |        | Spleen              | 2     | 3     | 3     | 2     | 3     | 6     | 2     | 4     | 3     | 3     | 3     | 3     | 3     | 5     | 4     | 3     | 4     | 3     |       |  |
|              |                       |        | <i>P</i> value      | 0.032 | 0.298 | 0.336 | 0.108 | 0.475 | 0.150 | 0.393 | 0.141 | 0.011 | 0.661 | 0.265 | 0.208 | 0.420 | 0.051 | 0.133 | 0.885 | 0.783 | 0.270 |       |  |
| <i>HEY1</i>  | +3,381                | Shore  | Brain               | 54    | 53    | 51    | 51    |       |       |       |       |       |       |       |       |       |       |       |       |       |       |       |  |
|              |                       |        | Liver               | 70    | 84    | 87    | 71    |       |       |       |       |       |       |       |       |       |       |       |       |       |       |       |  |
|              |                       |        | <i>P</i> value      | .023  | <.001 | <.001 | <.007 |       |       |       |       |       |       |       |       |       |       |       |       |       |       |       |  |
|              | +2,207                | Island | Brain               | 4     | 7     | 3     | 4     | 4     | 5     | 1     | 8     | 5     | 5     | 7     | 7     | 4     |       |       |       |       |       |       |  |
|              |                       |        | Liver               | 3     | 6     | 3     | 4     | 4     | 6     | 2     | 9     | 23    | 26    | 26    | 8     | 8     |       |       |       |       |       |       |  |
|              |                       |        | <i>P</i> value      | 0.349 | 0.309 | 0.226 | 0.460 | 0.630 | 0.252 | 0.017 | 0.336 | 0.255 | 0.179 | 0.238 | 0.432 | 0.001 |       |       |       |       |       |       |  |
| <i>HAGH</i>  | +2,192                | Shore  | Liver               | 26    | 30    | 22    | 18    | 7     | 6     | 23    | 33    |       |       |       |       |       |       |       |       |       |       |       |  |
|              |                       |        | Spleen              | 93    | 93    | 82    | 56    | 20    | 20    | 86    | 95    |       |       |       |       |       |       |       |       |       |       |       |  |
|              |                       |        | <i>P</i> value      | <.001 | <.001 | <.001 | <.001 | <.001 | <.001 | 0.017 | 0.017 |       |       |       |       |       |       |       |       |       |       |       |  |
|              | +206                  | Island | Liver               | 2     | 1     | 2     | 3     | 2     | 7     | 3     | 2     | 3     | 1     | 2     | 2     | 1     | 1     | 1     | 2     | 1     | 4     |       |  |
|              |                       |        | Spleen              | 2     | 2     | 3     | 4     | 2     | 2     | 2     | 2     | 4     | 1     | 4     | 2     | 2     | 3     | 2     | 4     | 1     | 8     |       |  |
|              |                       |        | <i>P</i> value      | 0.608 | 0.207 | 0.433 | 0.803 | 0.058 | 0.342 | 0.262 | 0.529 | 0.504 | 0.782 | 0.060 | 0.832 | 0.366 | 0.074 | 0.307 | 0.073 | 0.141 | 0.015 |       |  |
| <i>SLMO2</i> | +1,125                | Shore  | Normal              | 89    | 63    | 85    | 46    | 68    | 30    | 78    | 81    | 75    | 82    | 40    | 85    | 81    | 43    | 65    | 76    | 76    | 87    |       |  |
|              |                       |        | Tumor               | 37    | 28    | 34    | 19    | 30    | 13    | 34    | 40    | 35    | 36    | 18    | 38    | 36    | 19    | 30    | 39    | 37    | 46    |       |  |
|              |                       |        | <i>P</i> value      | <.001 | <.001 | <.001 | 0.005 | 0.002 | <.001 | <.001 | <.001 | 0.002 | <.001 | 0.036 | <.001 | <.001 | <.001 | <.001 | <.001 | <.001 | 0.003 | <.001 |  |
|              | +40                   | Island | Normal              | 4     | 2     | 3     | 3     | 6     | 4     | 3     | 2     | 3     | 2     | 3     | 3     | 4     | 2     | 7     | 5     |       |       |       |  |
|              |                       |        | Tumor               | 4     | 1     | 3     | 3     | 3     | 4     | 3     | 2     | 2     | 4     | 3     | 2     | 4     | 2     | 7     | 6     |       |       |       |  |
|              |                       |        | <i>P</i> value      | 0.619 | 0.233 | 0.293 | 0.546 | 0.302 | 0.364 | 0.461 | 0.204 | 0.586 | 0.263 | 0.173 | 0.369 | 0.253 | 0.928 | 0.230 | 0.509 |       |       |       |  |

<sup>a</sup> Location represents distance in base pairs, + denoting upstream and – downstream, from the transcriptional start site to the closest CpG site measured by bisulfite pyrosequencing (CG1). CG1-18 denote individual CpG site measured by bisulfite pyrosequencing. Values are percent methylation. The coordinates for each CpG site measured by pyrosequencing are provided in Supplementary Table 7.

<sup>b</sup> Brain, spleen, and liver tissues are from the same individuals. Normal and tumor represent matched colon tumor and mucosa from the same individuals.

**Supplementary Table 2. Bisulfite pyrosequencing confirms differential DNA methylation at 4 additional CpG island shores**

| Gene           | Location <sup>a</sup> | Region | Tissue <sup>b</sup> | CG1    | CG2    | CG3    | CG4    | CG5    | CG6    | CG7    | CG8    | CG9    | CG10   | CG11   | CG12   |        |
|----------------|-----------------------|--------|---------------------|--------|--------|--------|--------|--------|--------|--------|--------|--------|--------|--------|--------|--------|
| <i>SEMA3C</i>  | -409                  | Shore  | Tumor               | 31     | 32     | 32     | 34     | 31     | 26     | 24     | 21     | 23     | 9      | 9      | 1      |        |
|                |                       |        | Normal              | 65     | 71     | 68     | 64     | 63     | 52     | 58     | 41     | 43     | 21     | 17     | 2      |        |
|                |                       |        | P value             | <0.001 | <0.001 | <0.001 | <0.001 | <0.001 | <0.001 | <0.001 | 0.007  | <0.001 | 0.001  | 0.003  | <0.001 | 0.048  |
| <i>DSCAML1</i> | +2,875                | Shore  | Brain               | 34     | 30     | 29     | 28     | 33     | 26     | 33     | 26     | 38     | 23     | 26     |        |        |
|                |                       |        | Liver               | 86     | 79     | 87     | 89     | 76     | 71     | 88     | 82     | 98     | 70     | 77     |        |        |
|                |                       |        | P value             | <0.001 | <0.001 | <0.001 | <0.001 | <0.001 | 0.004  | <0.001 | <0.001 | <0.001 | <0.001 | <0.001 | <0.001 | <0.001 |
| <i>GPT2</i>    | -2,984                | Shore  | Spleen              | 93     | 93     | 82     | 56     | 20     | 20     | 86     | 95     |        |        |        |        |        |
|                |                       |        | Liver               | 26     | 30     | 22     | 18     | 7      | 5      | 23     | 33     |        |        |        |        |        |
|                |                       |        | Pvalue              | <0.001 | <0.001 | <0.001 | <0.001 | <0.001 | <0.001 | <0.001 | <0.001 | <0.001 | <0.001 |        |        |        |
| <i>ZNF532</i>  | +1,127                | Shore  | Liver               | 97     | 96     | 92     | 93     | 79     | 96     | 98     | 89     |        |        |        |        |        |
|                |                       |        | Brain               | 34     | 38     | 26     | 30     | 23     | 24     | 22     | 21     |        |        |        |        |        |
|                |                       |        | Pvalue              | <0.001 | <0.001 | <0.001 | <0.001 | <0.001 | <0.001 | <0.001 | <0.001 | <0.001 | <0.001 |        |        |        |

<sup>a</sup> Location is distance in base pairs, + denoting upstream and – downstream, from the transcriptional start site to closest CpG site measured by bisulfite pyrosequencing (CG1). CG1-12 denote individual CpG sites measured by bisulfite pyrosequencing. Values are percent methylation. The coordinates for each site are provided in Supplementary Table 7.

<sup>b</sup> Brain, spleen, and liver tissues are from the same individuals. Normal and tumor represent matched colon tumor and mucosa from the same individuals.

**Supplementary Table 3. Bisulfite pyrosequencing confirms differential DNA methylation at 9 C-DMRs.**

| C-DMR                             | Gene           | CHARM methylation <sup>a</sup> | Pyro normal <sup>b</sup> | Pyro cancer <sup>b</sup> | Number normal <sup>c</sup> | Number cancer <sup>c</sup> | Number matched <sup>d</sup> | <i>P</i>           |
|-----------------------------------|----------------|--------------------------------|--------------------------|--------------------------|----------------------------|----------------------------|-----------------------------|--------------------|
| Chr7:<br>96491680-96494485        | <i>DLX5</i>    | C > N                          | 8%                       | 22%                      | 53                         | 61                         | 42                          | <10 <sup>-6</sup>  |
| Chr14:<br>41147653-41148722       | <i>LRFN5</i>   | C > N                          | 23%                      | 44%                      | 61                         | 65                         | 55                          | <10 <sup>-14</sup> |
| Chr7:<br>27129188-27131713        | <i>HOXA3</i>   | C > N                          | 52%                      | 72%                      | 52                         | 59                         | 44                          | <10 <sup>-16</sup> |
| Chr13:<br>83352750-83353823       | <i>SLITRK1</i> | C > N                          | 36%                      | 46%                      | 56                         | 51                         | 26                          | 0.0009             |
| Chr3:<br>62335415-62336514        | <i>FEZF2</i>   | C > N                          | 16%                      | 40%                      | 42                         | 48                         | 39                          | <10 <sup>-14</sup> |
| Chr6:<br>52637426-52638797        | <i>TMEM14A</i> | N > C                          | 67%                      | 45%                      | 57                         | 64                         | 53                          | <10 <sup>-11</sup> |
| Chr8:<br>846979-849372            | <i>ERICH1</i>  | N > C                          | 71%                      | 56%                      | 30                         | 34                         | 23                          | <10 <sup>-3</sup>  |
| Chr13:<br>113615559-<br>113616275 | <i>FAM70B</i>  | N > C                          | 67%                      | 50%                      | 38                         | 36                         | 29                          | <10 <sup>-3</sup>  |
| Chr20:<br>55705356-55707713       | <i>TMEPAI</i>  | N > C                          | 29%                      | 17%                      | 48                         | 41                         | 30                          | <10 <sup>-6</sup>  |

<sup>a</sup> Relative methylation reported by CHARM (C, cancer; N, normal)

<sup>b</sup> Mean methylation level reported by bisulfite pyrosequencing

<sup>c</sup> Number of samples analyzed by bisulfite pyrosequencing

<sup>d</sup> Number of matched sample pairs from the same individuals

**Supplementary Table 4. Relationship between DNA methylation and gene expression for 2 T-DMRs and 6 C-DMRs**

| Gene           | Methylation <sup>a</sup> | Region           | Type  | Distance <sup>b</sup> | Distance <sup>c</sup> | Fold change <sup>d</sup> | <i>P</i> | Expression <sup>e</sup> |
|----------------|--------------------------|------------------|-------|-----------------------|-----------------------|--------------------------|----------|-------------------------|
| <i>FZD3</i>    | Brain < Liver            | Upstream Shore   | T-DMR | 844 bp                | 7 bp                  | 28.2                     | 0.002    | Brain > Liver           |
|                | Brain < Spleen           |                  |       | 844 bp                | 7 bp                  | 34.0                     | <0.001   | Brain > Spleen          |
| <i>RBM38</i>   | Brain > Spleen           | Intragenic Shore | T-DMR | 1937 bp               | 69 bp                 | 7.0                      | 0.005    | Brain < Spleen          |
|                | Liver > Spleen           |                  |       | 1937 bp               | 69 bp                 | 4.0                      | 0.136    | Liver < Spleen          |
| <i>NDN</i>     | Tumor > Normal           | Promoter Shore   | C-DMR | 47 bp                 | 0 bp                  | 4.2                      | 0.025    | Normal > Tumor          |
| <i>TRAF1</i>   | Tumor > Normal           | Intragenic Shore | C-DMR | 724 bp                | 0 bp                  | 2.8                      | 0.025    | Normal > Tumor          |
| <i>ZNF804A</i> | Tumor > Normal           | Promoter Shore   | C-DMR | 105 bp                | 185 bp                | 2.5                      | 0.047    | Normal > Tumor          |
| <i>CHRM2</i>   | Tumor > Normal           | Promoter Shore   | C-DMR | 433 bp                | 0 bp                  | 2.0                      | 0.346    | Normal > Tumor          |
| <i>NQO1</i>    | Normal > Tumor           | Promoter Shore   | C-DMR | 146 bp                | 216 bp                | 2.8                      | 0.004    | Tumor > Normal          |
| <i>SEMA3C</i>  | Normal > Tumor           | Promoter Shore   | C-DMR | 143 bp                | 0 bp                  | 4.8                      | 0.025    | Tumor > Normal          |

<sup>a</sup> Methylation level reported by CHARM from greatest to least.

<sup>b</sup> Base pairs to canonical transcriptional start site from the DMR.

<sup>c</sup> Base pairs to an alternative transcriptional start site from the DMR.

<sup>d</sup> Fold change =  $2^{-\Delta\Delta C_T}$ ;  $\Delta\Delta C_T$  is equal to  $(C_{T \text{ tissue A target gene}} - C_{T \text{ beta actin}}) - (C_{T \text{ tissue B target gene}} - C_{T \text{ beta actin}})$ .

<sup>e</sup> Tissue expression from greatest to least.

*P* was computed using a paired, two-tailed, t-test.



**Supplementary Table 5. Distribution of C-DMRs and T-DMRs.**

|                         | Total number | Percent |
|-------------------------|--------------|---------|
| Cancer DMRs             | 2,707        | 100%    |
| Colon DMRs              |              |         |
| Tumor hypermethylated   | 1,508        | 56%     |
| Tumor hypomethylated    | 1,199        | 44%     |
| Tissue DMRs             | 16,379       | 100%    |
| Brain DMRs              | 8200         |         |
| Brain hypermethylated   | 1717         | 21%     |
| Brain hypomethylated    | 6483         | 79%     |
| Liver DMRs              | 3511         |         |
| Liver hypermethylated   | 1763         | 50%     |
| Liver hypomethylated    | 1748         | 50%     |
| Spleen DMRs             | 3186         |         |
| Spleen hypermethylated  | 1208         | 38%     |
| Spleen hypomethylated   | 1978         | 62%     |
| Brain:Liver:Spleen DMRs | 1482         |         |

Brain:Liver:Spleen DMRs are regions that vary in methylation across all three tissues.

**Supplementary Table 7. Gene ontology functional categories enriched in hyper- and hypomethylated C-DMRs (P < 0.01)**

| C-DMR           | GO BP ID   | P value  | Odds Ratio | ExpCount | Count | Size | Term                                                                                | C-DMR Region    |
|-----------------|------------|----------|------------|----------|-------|------|-------------------------------------------------------------------------------------|-----------------|
| Hypermethylated | GO:0065007 | 1.75E-15 | 1.43       | 1049.09  | 1221  | 3840 | biological regulation                                                               | Inside          |
|                 | GO:0006355 | 2.40E-13 | 1.50       | 504.3282 | 632   | 1846 | regulation of transcription, DNA-dependent                                          | Inside/promoter |
|                 | GO:0022008 | 1.49E-12 | 2.56       | 66.11453 | 117   | 242  | neurogenesis                                                                        | Inside/promoter |
|                 | GO:0032774 | 2.03E-12 | 1.47       | 517.4418 | 641   | 1894 | RNA biosynthetic process                                                            | Inside/promoter |
|                 | GO:0019219 | 1.13E-11 | 1.44       | 545.5814 | 667   | 1997 | regulation of nucleobase, nucleoside, nucleotide and nucleic acid metabolic process | Inside/promoter |
|                 | GO:0006350 | 2.42E-11 | 1.43       | 552.1383 | 672   | 2021 | transcription                                                                       | Inside/promoter |
|                 | GO:0010468 | 9.44E-11 | 1.41       | 569.6231 | 687   | 2085 | regulation of gene expression                                                       | inside          |
|                 | GO:0007399 | 3.96E-10 | 2.24       | 69.90378 | 116   | 263  | nervous system development                                                          | inside          |
|                 | GO:0019222 | 7.12E-10 | 1.37       | 622.0776 | 737   | 2277 | regulation of metabolic process                                                     | inside          |
|                 | GO:0007275 | 2.63E-09 | 1.91       | 100.0965 | 152   | 395  | multicellular organismal development                                                | inside/promoter |
|                 | GO:0050794 | 2.78E-09 | 1.37       | 612.7722 | 721   | 2297 | regulation of cellular process                                                      | inside          |
|                 | GO:0007155 | 3.54E-09 | 1.74       | 143.9767 | 204   | 527  | cell adhesion                                                                       | inside          |
|                 | GO:0048667 | 1.03E-08 | 3.00       | 30.59846 | 59    | 112  | neuron morphogenesis during differentiation                                         | inside/promoter |
|                 | GO:0031175 | 2.06E-08 | 2.79       | 33.87686 | 63    | 124  | neurite development                                                                 | inside/promoter |
|                 | GO:0006366 | 5.56E-07 | 1.57       | 154.0851 | 206   | 564  | transcription from RNA polymerase II promoter                                       | inside          |
|                 | GO:0048598 | 6.02E-07 | 3.03       | 22.67564 | 44    | 83   | embryonic morphogenesis                                                             | inside/promoter |
|                 | GO:0006813 | 7.63E-07 | 2.39       | 36.60887 | 63    | 134  | potassium ion transport                                                             | inside          |
|                 | GO:0048731 | 2.51E-06 | 1.51       | 163.7593 | 214   | 629  | system development                                                                  | inside          |
|                 | GO:0007268 | 4.80E-06 | 2.06       | 46.00111 | 73    | 169  | synaptic transmission                                                               | inside          |
|                 | GO:0001501 | 6.53E-06 | 2.07       | 43.98528 | 70    | 161  | skeletal development                                                                | inside          |
|                 | GO:0007166 | 7.82E-06 | 1.38       | 258.195  | 316   | 947  | cell surface receptor linked signal transduction                                    | inside/promoter |
|                 | GO:0048663 | 8.67E-06 | 16.03      | 3.824807 | 12    | 14   | neuron fate commitment                                                              | inside/promoter |
|                 | GO:0009887 | 1.12E-05 | 1.73       | 77.15602 | 110   | 283  | organ morphogenesis                                                                 | inside          |
|                 | GO:0048858 | 1.20E-05 | 1.98       | 47.81009 | 74    | 175  | cell projection morphogenesis                                                       | inside/promoter |
|                 | GO:0007411 | 1.37E-05 | 3.38       | 14.20643 | 29    | 52   | axon guidance                                                                       | inside          |
|                 | GO:0032989 | 1.71E-05 | 1.81       | 62.01652 | 91    | 227  | cellular structure morphogenesis                                                    | inside          |
|                 | GO:0007417 | 1.77E-05 | 4.03       | 4.162579 | 15    | 210  | central nervous system development                                                  | promoter/inside |
|                 | GO:0045165 | 1.78E-05 | 5.12       | 7.884457 | 19    | 29   | cell fate commitment                                                                | inside          |

|                 |            |          |       |          |     |      |                                                                      |                 |
|-----------------|------------|----------|-------|----------|-----|------|----------------------------------------------------------------------|-----------------|
|                 | GO:0050877 | 3.16E-05 | 1.46  | 153.5387 | 196 | 562  | neurological system process                                          | inside          |
|                 | GO:0030182 | 4.77E-05 | 4.13  | 3.500752 | 13  | 180  | neuron differentiation                                               | promoter/inside |
|                 | GO:0003002 | 6.81E-05 | 3.01  | 14.43907 | 28  | 53   | regionalization                                                      | inside          |
|                 | GO:0030198 | 7.50E-05 | 4.23  | 8.469216 | 19  | 31   | extracellular matrix organization and biogenesis                     | inside          |
|                 | GO:0007165 | 0.000112 | 1.27  | 370.8697 | 428 | 1393 | signal transduction                                                  | inside          |
|                 | GO:0007498 | 0.000119 | 3.46  | 10.65482 | 22  | 39   | mesoderm development                                                 | inside          |
|                 | GO:0006811 | 0.000179 | 1.76  | 50.34717 | 73  | 186  | ion transport                                                        | inside/promoter |
|                 | GO:0016481 | 0.000212 | 1.62  | 69.11973 | 95  | 253  | negative regulation of transcription                                 | inside          |
|                 | GO:0008286 | 0.000212 | 4.13  | 7.649615 | 17  | 28   | insulin receptor signaling pathway                                   | inside          |
|                 | GO:0007223 | 0.00022  | 5.79  | 5.19081  | 13  | 19   | Wnt receptor signaling pathway, calcium modulating pathway           | inside          |
|                 | GO:0048518 | 0.000234 | 1.31  | 236.0452 | 281 | 864  | positive regulation of biological process                            | inside          |
|                 | GO:0007156 | 0.00028  | 1.97  | 32.23766 | 50  | 118  | homophilic cell adhesion                                             | inside          |
| Hypermethylated | GO:0007409 | 0.000289 | 2.70  | 14.67244 | 27  | 54   | axonogenesis                                                         | inside/promoter |
|                 | GO:0006928 | 0.000332 | 1.54  | 81.96016 | 109 | 300  | cell motility                                                        | inside          |
|                 | GO:0000122 | 0.000357 | 1.95  | 32.51086 | 50  | 119  | negative regulation of transcription from RNA polymerase II promoter | inside          |
|                 | GO:0051253 | 0.000364 | 1.72  | 49.72249 | 71  | 182  | negative regulation of RNA metabolic process                         | inside          |
|                 | GO:0048869 | 0.000389 | 1.88  | 26.48193 | 44  | 1336 | cellular developmental process                                       | promoter        |
|                 | GO:0030901 | 0.000399 | 30.11 | 0.158574 | 3   | 8    | midbrain development                                                 | promoter/inside |
|                 | GO:0019933 | 0.000447 | 2.43  | 17.21163 | 30  | 63   | cAMP-mediated signaling                                              | inside          |
|                 | GO:0048523 | 0.000503 | 1.38  | 142.3193 | 176 | 525  | negative regulation of cellular process                              | inside          |
|                 | GO:0009790 | 0.000527 | 3.01  | 10.78958 | 21  | 40   | embryonic development                                                | inside          |
|                 | GO:0007169 | 0.000542 | 3.86  | 2.834518 | 10  | 143  | transmembrane receptor protein tyrosine kinase signaling pathway     | promoter/inside |
|                 | GO:0045941 | 0.000581 | 1.57  | 68.30013 | 92  | 250  | positive regulation of transcription                                 | inside          |
|                 | GO:0035107 | 0.000665 | 3.17  | 9.562018 | 19  | 35   | appendage morphogenesis                                              | inside/promoter |
|                 | GO:0060173 | 0.000665 | 3.17  | 9.562018 | 19  | 35   | limb development                                                     | inside/promoter |
|                 | GO:0035295 | 0.00079  | 2.00  | 26.22725 | 41  | 96   | tube development                                                     | inside          |
|                 | GO:0009792 | 0.000941 | 2.04  | 24.04165 | 38  | 88   | embryonic development ending in birth or egg hatching                | inside          |
|                 | GO:0006817 | 0.001021 | 2.34  | 16.39203 | 28  | 60   | phosphate transport                                                  | inside          |
|                 | GO:0035270 | 0.001048 | 3.65  | 7.092567 | 15  | 26   | endocrine system development                                         | inside          |
|                 | GO:0001709 | 0.001066 | 3.64  | 7.103214 | 15  | 26   | cell fate determination                                              | inside/promoter |

|                 |            |          |       |          |     |      |                                                                      |                 |
|-----------------|------------|----------|-------|----------|-----|------|----------------------------------------------------------------------|-----------------|
|                 | GO:0030326 | 0.001093 | 3.24  | 8.469216 | 17  | 31   | embryonic limb morphogenesis                                         | inside/promoter |
|                 | GO:0043583 | 0.00125  | 2.81  | 10.65482 | 20  | 39   | ear development                                                      | inside          |
|                 | GO:0051254 | 0.001323 | 1.58  | 56.00611 | 76  | 205  | positive regulation of RNA metabolic process                         | inside          |
|                 | GO:0001649 | 0.00135  | 3.74  | 6.556812 | 14  | 24   | osteoblast differentiation                                           | inside          |
|                 | GO:0016477 | 0.001648 | 3.09  | 3.84543  | 11  | 194  | cell migration                                                       | promoter        |
|                 | GO:0001756 | 0.001671 | 5.34  | 4.098008 | 10  | 15   | somitogenesis                                                        | inside          |
|                 | GO:0030154 | 0.001739 | 1.24  | 282.3619 | 323 | 1062 | cell differentiation                                                 | inside          |
|                 | GO:0009953 | 0.001796 | 3.34  | 7.376414 | 15  | 27   | dorsal/ventral pattern formation                                     | inside          |
|                 | GO:0007420 | 0.0018   | 2.17  | 17.64753 | 29  | 65   | brain development                                                    | inside          |
| Hypermethylated | GO:0031325 | 0.001905 | 1.42  | 91.79537 | 116 | 336  | positive regulation of cellular metabolic process                    | inside          |
|                 | GO:0031016 | 0.002219 | 7.11  | 3.005206 | 8   | 11   | pancreas development                                                 | inside          |
|                 | GO:0030878 | 0.002221 | 15.99 | 1.912404 | 6   | 7    | thyroid gland development                                            | inside          |
|                 | GO:0045597 | 0.002287 | 2.24  | 15.57243 | 26  | 57   | positive regulation of cell differentiation                          | inside          |
|                 | GO:0042472 | 0.002303 | 3.40  | 6.830013 | 14  | 25   | inner ear morphogenesis                                              | inside          |
|                 | GO:0001654 | 0.002407 | 2.67  | 10.38162 | 19  | 38   | eye development                                                      | inside          |
|                 | GO:0048534 | 0.002449 | 1.72  | 34.96967 | 50  | 128  | hemopoietic or lymphoid organ development                            | inside          |
|                 | GO:0001764 | 0.002689 | 2.84  | 9.015617 | 17  | 33   | neuron migration                                                     | inside          |
|                 | GO:0009653 | 0.002713 | 1.70  | 35.04919 | 50  | 132  | anatomical structure morphogenesis                                   | inside          |
|                 | GO:0007267 | 0.002732 | 1.48  | 66.00984 | 86  | 245  | cell-cell signaling                                                  | inside          |
|                 | GO:0045944 | 0.002991 | 1.71  | 34.42327 | 49  | 126  | positive regulation of transcription from RNA polymerase II promoter | inside          |
|                 | GO:0048666 | 0.003085 | 4.51  | 4.323974 | 10  | 16   | neuron development                                                   | inside          |
|                 | GO:0006812 | 0.003153 | 1.37  | 103.8162 | 128 | 380  | cation transport                                                     | inside          |
|                 | GO:0007507 | 0.003355 | 2.05  | 18.26662 | 29  | 67   | heart development                                                    | inside          |
|                 | GO:0003007 | 0.003369 | 4.45  | 4.371208 | 10  | 16   | heart morphogenesis                                                  | inside          |
|                 | GO:0048513 | 0.003421 | 1.84  | 17.14586 | 29  | 865  | organ development                                                    | promoter        |
|                 | GO:0042311 | 0.003551 | 11.57 | 0.317149 | 3   | 16   | vasodilation                                                         | promoter        |
|                 | GO:0030855 | 0.003746 | 3.11  | 7.103214 | 14  | 26   | epithelial cell differentiation                                      | inside          |
|                 | GO:0045761 | 0.004025 | 2.67  | 9.288818 | 17  | 34   | regulation of adenylate cyclase activity                             | inside          |
|                 | GO:0007595 | 0.004249 | 10.74 | 0.336971 | 3   | 17   | lactation                                                            | promoter        |
|                 | GO:0007369 | 0.004843 | 3.67  | 5.19081  | 11  | 19   | gastrulation                                                         | inside          |
|                 | GO:0030902 | 0.004843 | 3.67  | 5.19081  | 11  | 19   | hindbrain development                                                | inside          |
|                 | GO:0001935 | 0.005025 | 10.03 | 0.356792 | 3   | 18   | endothelial cell proliferation                                       | promoter        |
|                 | GO:0042136 | 0.005064 | 5.33  | 3.278406 | 8   | 12   | neurotransmitter biosynthetic process                                | inside          |

## Hypermethylated

|            |          |       |          |     |      |                                                         |          |
|------------|----------|-------|----------|-----|------|---------------------------------------------------------|----------|
| GO:0048839 | 0.005371 | 6.29  | 0.713585 | 4   | 36   | inner ear development                                   | promoter |
| GO:0002052 | 0.005562 | Inf   | 1.092802 | 4   | 4    | positive regulation of neuroblast proliferation         | inside   |
| GO:0009249 | 0.005562 | Inf   | 1.092802 | 4   | 4    | protein lipoylation                                     | inside   |
| GO:0021871 | 0.005562 | Inf   | 1.092802 | 4   | 4    | forebrain regionalization                               | inside   |
| GO:0045885 | 0.005562 | Inf   | 1.092802 | 4   | 4    | positive regulation of survival gene product activity   | inside   |
| GO:0001505 | 0.005663 | 1.97  | 18.03123 | 28  | 66   | regulation of neurotransmitter levels                   | inside   |
| GO:0048732 | 0.005765 | 2.53  | 9.547686 | 17  | 35   | gland development                                       | inside   |
| GO:0006814 | 0.005976 | 1.84  | 22.12924 | 33  | 81   | sodium ion transport                                    | inside   |
| GO:0006023 | 0.006192 | 3.81  | 4.644409 | 10  | 17   | aminoglycan biosynthetic process                        | inside   |
| GO:0042127 | 0.006293 | 1.35  | 97.53259 | 119 | 357  | regulation of cell proliferation                        | inside   |
| GO:0030324 | 0.006442 | 2.40  | 10.38162 | 18  | 38   | lung development                                        | inside   |
| GO:0002062 | 0.006821 | 8.00  | 2.185604 | 6   | 8    | chondrocyte differentiation                             | inside   |
| GO:0040018 | 0.006821 | 8.00  | 2.185604 | 6   | 8    | positive regulation of multicellular organism growth    | inside   |
| GO:0007611 | 0.006957 | 2.31  | 11.20122 | 19  | 41   | learning and/or memory                                  | inside   |
| GO:0045661 | 0.007037 | 13.32 | 1.639203 | 5   | 6    | regulation of myoblast differentiation                  | inside   |
| GO:0045773 | 0.007037 | 13.32 | 1.639203 | 5   | 6    | positive regulation of axon extension                   | inside   |
| GO:0007154 | 0.007222 | 1.48  | 52.15117 | 68  | 2631 | cell communication                                      | promoter |
| GO:0009880 | 0.007599 | 2.89  | 6.830013 | 13  | 25   | embryonic pattern specification                         | inside   |
| GO:0030321 | 0.007689 | 19.97 | 0.138753 | 2   | 7    | transepithelial chloride transport                      | promoter |
| GO:0031018 | 0.007689 | 19.97 | 0.138753 | 2   | 7    | endocrine pancreas development                          | promoter |
| GO:0008015 | 0.007821 | 3.29  | 2.279507 | 7   | 115  | blood circulation                                       | promoter |
| GO:0000165 | 0.008109 | 1.64  | 30.87166 | 43  | 113  | MAPKKK cascade                                          | inside   |
| GO:0007215 | 0.008131 | 3.26  | 5.46401  | 11  | 20   | glutamate signaling pathway                             | inside   |
| GO:0051056 | 0.008464 | 1.47  | 50.8153  | 66  | 186  | regulation of small GTPase mediated signal transduction | inside   |
| GO:0007204 | 0.008553 | 5.44  | 0.812694 | 4   | 41   | elevation of cytosolic calcium ion concentration        | promoter |
| GO:0006936 | 0.008566 | 3.23  | 2.319151 | 7   | 117  | muscle contraction                                      | promoter |
| GO:0040011 | 0.008827 | 1.96  | 16.11883 | 25  | 59   | locomotion                                              | inside   |
| GO:0030900 | 0.008854 | 2.29  | 10.64347 | 18  | 39   | forebrain development                                   | inside   |
| GO:0031324 | 0.009247 | 1.32  | 98.62539 | 119 | 361  | negative regulation of cellular metabolic process       | inside   |
| GO:0042592 | 0.009255 | 1.34  | 90.42937 | 110 | 331  | homeostatic process                                     | inside   |

|                |            |          |       |          |     |      |                                                                       |        |
|----------------|------------|----------|-------|----------|-----|------|-----------------------------------------------------------------------|--------|
|                | GO:0002009 | 0.009685 | 2.92  | 6.26769  | 12  | 23   | morphogenesis of an epithelium                                        | inside |
|                | GO:0001656 | 0.009895 | 2.91  | 6.283612 | 12  | 23   | metanephros development                                               | inside |
|                | GO:0042445 | 0.00997  | 2.14  | 12.29402 | 20  | 45   | hormone metabolic process                                             | inside |
|                | GO:0032501 | 7.53E-07 | 1.31  | 504.7175 | 590 | 2357 | multicellular organismal process                                      | inside |
|                | GO:0007155 | 2.18E-06 | 1.60  | 112.8494 | 157 | 527  | cell adhesion                                                         | inside |
|                | GO:0032502 | 5.33E-05 | 1.25  | 503.4327 | 572 | 2351 | developmental process                                                 | inside |
|                | GO:0006816 | 9.88E-05 | 2.42  | 18.41566 | 34  | 86   | calcium ion transport                                                 | inside |
|                | GO:0007165 | 0.000127 | 1.31  | 258.2146 | 308 | 1226 | signal transduction                                                   | inside |
|                | GO:0009887 | 0.000132 | 1.63  | 64.02653 | 91  | 299  | organ morphogenesis<br>regulation of small GTPase mediated signal     | inside |
|                | GO:0051056 | 0.000185 | 1.81  | 39.82921 | 61  | 186  | transduction                                                          | inside |
|                | GO:0007399 | 0.000207 | 1.41  | 134.4771 | 171 | 628  | nervous system development                                            | inside |
|                | GO:0048731 | 0.000231 | 1.40  | 134.76   | 171 | 641  | system development                                                    | inside |
|                | GO:0006812 | 0.000257 | 1.52  | 81.37151 | 110 | 380  | cation transport                                                      | inside |
|                | GO:0007154 | 0.000309 | 1.64  | 55.3083  | 79  | 271  | cell communication                                                    | inside |
| Hypomethylated | GO:0006817 | 0.00031  | 2.64  | 12.84813 | 25  | 60   | phosphate transport                                                   | inside |
|                | GO:0048667 | 0.000336 | 2.06  | 23.98318 | 40  | 112  | neuron morphogenesis during differentiation                           | inside |
|                | GO:0007409 | 0.00043  | 2.07  | 22.69837 | 38  | 106  | axonogenesis                                                          | inside |
|                | GO:0001525 | 0.000486 | 2.08  | 22.05596 | 37  | 103  | angiogenesis                                                          | inside |
|                | GO:0003015 | 0.000486 | 3.16  | 8.351286 | 18  | 39   | heart process                                                         | inside |
|                | GO:0032989 | 0.000504 | 1.66  | 48.60877 | 70  | 227  | cellular structure morphogenesis                                      | inside |
|                | GO:0035023 | 0.000542 | 2.35  | 15.41776 | 28  | 72   | regulation of Rho protein signal transduction                         | inside |
|                | GO:0030879 | 0.000937 | 7.36  | 2.569627 | 8   | 12   | mammary gland development                                             | inside |
|                | GO:0008016 | 0.001128 | 3.11  | 7.494744 | 16  | 35   | regulation of heart contraction                                       | inside |
|                | GO:0006811 | 0.001488 | 2.18  | 15.51374 | 27  | 74   | ion transport                                                         | inside |
|                | GO:0031175 | 0.001662 | 1.83  | 26.55281 | 41  | 124  | neurite development                                                   | inside |
|                | GO:0006820 | 0.001971 | 1.81  | 26.76694 | 41  | 125  | anion transport                                                       | inside |
|                | GO:0048858 | 0.002059 | 1.65  | 37.47372 | 54  | 175  | cell projection morphogenesis                                         | inside |
|                | GO:0050801 | 0.002091 | 1.64  | 38.33026 | 55  | 179  | ion homeostasis                                                       | inside |
|                | GO:0001568 | 0.002126 | 1.77  | 28.48003 | 43  | 133  | blood vessel development<br>positive regulation of smooth muscle cell | inside |
|                | GO:0048661 | 0.002212 | 18.39 | 1.284813 | 5   | 6    | proliferation                                                         | inside |
|                | GO:0007268 | 0.002312 | 1.54  | 50.32185 | 69  | 235  | synaptic transmission                                                 | inside |
|                | GO:0006813 | 0.002495 | 1.75  | 28.69416 | 43  | 134  | potassium ion transport                                               | inside |
|                | GO:0030324 | 0.00321  | 2.68  | 8.137151 | 16  | 38   | lung development                                                      | inside |
|                | GO:0050877 | 0.003314 | 1.32  | 120.3442 | 147 | 562  | neurological system process                                           | inside |

|                |            |          |       |          |     |      |                                                                                      |          |
|----------------|------------|----------|-------|----------|-----|------|--------------------------------------------------------------------------------------|----------|
|                | GO:0006029 | 0.003629 | 10.84 | 0.312344 | 3   | 30   | proteoglycan metabolic process                                                       | promoter |
|                | GO:0051147 | 0.004404 | 7.36  | 1.92722  | 6   | 9    | regulation of muscle cell differentiation                                            | inside   |
|                | GO:0008299 | 0.005816 | 5.15  | 2.569627 | 7   | 12   | isoprenoid biosynthetic process                                                      | inside   |
|                | GO:0007265 | 0.005855 | 1.53  | 41.75643 | 57  | 195  | Ras protein signal transduction                                                      | inside   |
|                | GO:0005513 | 0.006372 | 9.19  | 1.498949 | 5   | 7    | detection of calcium ion                                                             | inside   |
|                | GO:0009395 | 0.006372 | 9.19  | 1.498949 | 5   | 7    | phospholipid catabolic process                                                       | inside   |
|                | GO:0003001 | 0.007507 | 2.03  | 13.2764  | 22  | 62   | generation of a signal involved in cell-cell signaling                               | inside   |
| Hypomethylated | GO:0043062 | 0.008118 | 1.97  | 14.13295 | 23  | 66   | extracellular structure organization and biogenesis                                  | inside   |
|                | GO:0007528 | 0.009022 | 5.52  | 2.141355 | 6   | 10   | neuromuscular junction development                                                   | inside   |
|                | GO:0007613 | 0.009022 | 5.52  | 2.141355 | 6   | 10   | memory                                                                               | inside   |
|                | GO:0045884 | 0.009022 | 5.52  | 2.141355 | 6   | 10   | regulation of survival gene product expression                                       | inside   |
|                | GO:0048659 | 0.009022 | 5.52  | 2.141355 | 6   | 10   | smooth muscle cell proliferation                                                     | inside   |
|                | GO:0007242 | 0.0098   | 1.19  | 242.8297 | 274 | 1134 | intracellular signaling cascade                                                      | inside   |
|                | GO:0030949 | 0.009808 | Inf   | 0.642407 | 3   | 3    | positive regulation of vascular endothelial growth factor receptor signaling pathway | inside   |
|                | GO:0035313 | 0.009808 | Inf   | 0.642407 | 3   | 3    | wound healing, spreading of epidermal cells                                          | inside   |
|                | GO:0045662 | 0.009808 | Inf   | 0.642407 | 3   | 3    | negative regulation of myoblast differentiation                                      | inside   |
|                | GO:0045740 | 0.009808 | Inf   | 0.642407 | 3   | 3    | positive regulation of DNA replication                                               | inside   |

---

**Supplementary Table7. Location of CpG sites validated by bisulfite pyrosequencing**

**Chromosomal coordinates for CG1-CG9**

| Gene           | Region | Chr | CG1       | CG2       | CG3       | CG4       | CG5       | CG6       | CG7       | CG8       | CG9       |
|----------------|--------|-----|-----------|-----------|-----------|-----------|-----------|-----------|-----------|-----------|-----------|
| <i>SLMO2</i>   | Shore  | 20  | 57049852  | 57049859  | 57049884  | 57049912  | 57049933  | 57049937  | 57049958  | 57049972  | 57050013  |
| <i>SLMO2</i>   | Island | 20  | 57051256  | 57051274  | 57051277  | 57051280  | 57051287  | 57051293  | 57051299  | 57051305  | 57051308  |
| <i>PCDH9</i>   | Shore  | 13  | 66698906  | 66698964  | 66699018  | 66699044  | 66699123  | 66699126  |           |           |           |
| <i>PCDH9</i>   | Island | 13  | 66702731  | 66702734  | 66702745  | 66702747  | 66702753  | 66702766  | 66702770  | 66702776  | 66702779  |
| <i>HEY1</i>    | Shore  | 8   | 80839112  | 80839160  | 80839206  | 80839272  |           |           |           |           |           |
| <i>HEY1</i>    | Island | 8   | 80840367  | 80840374  | 80840376  | 80840382  | 80840385  | 80840389  | 80840391  | 80840399  | 80840409  |
| <i>HAGH</i>    | Shore  | 16  | 1814967   | 1814974   | 1814978   | 1815044   | 1815048   | 1815086   | 1815091   | 1815095   |           |
| <i>HAGH</i>    | Island | 16  | 1816837   | 1816840   | 1816843   | 1816846   | 1816848   | 1816851   | 1816868   | 1816873   | 1816875   |
| <i>SEMA3C</i>  | Shore  | 7   | 80387012  | 80387355  | 80387019  | 80387340  | 80387067  | 80387071  | 80387080  | 80387092  | 80387102  |
| <i>DSCAML1</i> | Shore  | 11  | 117170021 | 117170072 | 117170149 | 117170209 | 117170224 | 117170231 | 117170236 | 117170239 | 117170250 |
| <i>GPT2</i>    | Shore  | 16  | 45474293  | 45474335  | 45474389  | 45474480  | 45474502  | 45474508  | 45474539  | 45474564  |           |
| <i>ZNF532</i>  | Shore  | 18  | 54683963  | 54683972  | 54683997  | 54684040  | 54684060  | 54684099  | 54684127  | 54684162  |           |

**Chromosomal coordinates for CG10-CG18**

| Gene           | Region | Chr | CG10      | CG11      | CG12     | CG13     | CG14     | CG15     | CG16     | CG17     | CG18     |
|----------------|--------|-----|-----------|-----------|----------|----------|----------|----------|----------|----------|----------|
| <i>SLMO2</i>   | Shore  | 20  | 57050041  | 57050045  | 57050047 | 57050057 | 57050099 | 57050109 | 57050116 | 57050141 | 57050171 |
| <i>SLMO2</i>   | Island | 20  | 57051310  | 57051317  | 57051305 | 57051327 | 57051329 | 57051337 | 57051347 |          |          |
| <i>PCDH9</i>   | Shore  | 13  |           |           |          |          |          |          |          |          |          |
| <i>PCDH9</i>   | Island | 13  | 66702783  | 66702789  | 66702798 | 66702802 | 66702816 | 66702825 | 66702828 | 66702838 | 66702841 |
| <i>HEY1</i>    | Shore  | 8   |           |           |          |          |          |          |          |          |          |
| <i>HEY1</i>    | Island | 8   | 80840425  | 80840435  | 80840441 | 80840446 |          |          |          |          |          |
| <i>HAGH</i>    | Shore  | 16  |           |           |          |          |          |          |          |          |          |
| <i>HAGH</i>    | Island | 16  | 1816895   | 1816904   | 1816909  | 1816913  | 1816927  | 1816929  | 1816933  | 1816935  | 1816953  |
| <i>SEMA3C</i>  | Shore  | 7   | 80387104  | 80387107  | 80387120 |          |          |          |          |          |          |
| <i>DSCAML1</i> | Shore  | 11  | 117170304 | 117170311 |          |          |          |          |          |          |          |



**Supplementary Table 8. Primer sequences and annealing temperatures used for bisulfite pyrosequencing**

| Gene            | Region                    | Primer          | Sequence (5'→3')                | Annealing temperature (°C) | Nested annealing temperature (°C) |
|-----------------|---------------------------|-----------------|---------------------------------|----------------------------|-----------------------------------|
| <i>SLMO2</i>    | Island                    | Forward         | ATAATGAGGTATAGAGGTTATA          | 44                         | 45                                |
|                 |                           | Reverse         | AACATCTATATCAACAACTAA           |                            |                                   |
|                 |                           | Nested forward  | Bio-GAGGTTATATTTGTTTTTGT        |                            |                                   |
|                 |                           | Nested reverse  | Bio-AACTCTACCCAAAAATCAAAA       |                            |                                   |
|                 | Shore                     | Sequencing1 (F) | GGTTTTGTTTTAGTTTTG              | 49                         |                                   |
|                 |                           | Sequencing2 (R) | CAAACTAAAACAAAACC               |                            |                                   |
|                 |                           | Forward         | GATATAGTAGGTTTTAGGATGTGT        |                            |                                   |
|                 |                           | Reverse         | TTACCACACTATTTTAATTAATATAACCT   |                            |                                   |
|                 |                           | Nested forward  | AGGATGTGTTTTATTGAGTATA          |                            |                                   |
|                 |                           | Nested reverse  | Bio-AAAACCATTTATATTTTTAAACT     |                            |                                   |
|                 |                           | Sequencing1 (F) | TGTTTTATTGAGTATAAATG            |                            |                                   |
|                 |                           | Sequencing2 (F) | GTGGTTTATATTTGTAATTT            |                            |                                   |
|                 |                           | Sequencing3 (F) | GAATTATTTGAGGTTAGGTG            |                            |                                   |
|                 |                           | Sequencing4 (F) | TGATTAATATGGTGAAATTT            |                            |                                   |
| Sequencing5 (F) | TTAAAAATATAAAAATTAGT      |                 |                                 |                            |                                   |
| Sequencing6 (F) | GGAGGTTAAGGTAGGAGAAT      |                 |                                 |                            |                                   |
| Sequencing7 (F) | GTTGTAGTGAGTTAAGAATA      |                 |                                 |                            |                                   |
| <i>HEY</i>      | Island                    | Forward         | GAGGTGATTATAGGGAGTAT            | 46                         | 41                                |
|                 |                           | Reverse         | AACCCTAAAATTTTCTTTTATTC         |                            |                                   |
|                 |                           | Nested forward  | GTTTTGGGGTAGTAATAG              |                            |                                   |
|                 |                           | Nested reverse  | Bio-CTAAACATCATTAAAAAACTA       |                            |                                   |
|                 | Shore                     | Sequencing (F)  | GGTTTTTTAGGGAATGTGTT            | 49                         | 45                                |
|                 |                           | Forward         | AAAGAGGTATTATTATTTATATATTTTGTGG |                            |                                   |
|                 |                           | Reverse         | TATTAAACTTAAACCTAAAATTTACATC    |                            |                                   |
|                 |                           | Nested forward  | GGTAGTTTTAGGAAAATTAGG           |                            |                                   |
|                 |                           | Nested reverse  | Bio-AACTATTAATAACCCTAAATCC      |                            |                                   |
|                 |                           | Sequencing1 (F) | GTATTATTTAATTGATTATT            |                            |                                   |
|                 |                           | Sequencing2 (F) | ATATTTGTGAATTTGAGATT            |                            |                                   |
|                 |                           | Sequencing3 (F) | TTGGGGTTGGTAAATGTAGG            |                            |                                   |
|                 |                           | Sequencing4 (F) | AATGAGATTTAATTTATTAG            |                            |                                   |
|                 |                           | <i>HAGH</i>     | Island                          |                            |                                   |
| Reverse         | CAATAACCTAAATACTACCATAATT |                 |                                 |                            |                                   |
| Nested forward  | Bio-GTTGTTTAGGATTGTAATAAT |                 |                                 |                            |                                   |
| Nested reverse  | Bio-AAAAAAACCAACTACCTC    |                 |                                 |                            |                                   |
| Shore           | Sequencing1 (F)           |                 | TTGTTTTTAGTTAATTAG              | 49                         |                                   |
|                 | Sequencing2 (F)           |                 | GTATAGTGGATTTTTGGAGGT           |                            |                                   |
|                 | Sequencing3 (R)           |                 | CTAATTAACATAAAAACAA             |                            |                                   |
|                 | Sequencing4 (R)           |                 | ACCTCCAAAAATCCACTATAC           |                            |                                   |
|                 | Forward                   |                 | AAGGAGTATAATAAGTAGAGTGTG        |                            |                                   |
|                 |                           |                 |                                 |                            |                                   |

|                |        |                 |                              |    |
|----------------|--------|-----------------|------------------------------|----|
|                |        | Reverse         | AAAACACCTCCCTAAATTATCAA      |    |
|                |        | Nested forward  | GTAGAAGGGTTGTGATAGGAT        | 48 |
|                |        | Nested reverse  | Bio-CCTCCCTAAATTATCAACTTC    |    |
|                |        | Sequencing1 (F) | GAAGGGTTGTGATAGGATTT         |    |
|                |        | Sequencing2 (F) | ATAAATAAAAATATTGTTTA         |    |
|                |        | Sequencing3 (F) | ATTTTAGTATTTTGGGAGGT         |    |
|                |        | Sequencing4 (F) | AAATATAAAAATTAGTTGGG         |    |
|                |        | Sequencing5 (F) | GGAGGTTGAGGTAGGAGATT         |    |
|                |        | Sequencing6 (F) | AGGTAGAGGTTGTAGTGAGT         |    |
| <i>PCDH9</i>   | Island | Forward         | GTTGATTGTTTTTTAGTTTTTTT      | 45 |
|                |        | Reverse         | CCCAACCCAAAAATAACTATA        |    |
|                |        | Nested forward  | Bio-AAATTTGATTTTGGTTTTAGGAGA | 49 |
|                |        | Nested reverse  | Bio-ACTCCCCCATCTATACATTTTAA  |    |
|                |        | Sequencing1 (F) | GTATTGAGTATGTTTTGTAGGGTT     |    |
|                |        | Sequencing2 (R) | CTTCACTTAACAAAAAATAT         |    |
|                | Shore  | Forward         | GAAAATGATTATGAGTAAATTTGGG    | 49 |
|                |        | Reverse         | CTTAAAAATAAAAATAACAACCCACC   |    |
|                |        | Nested forward  | GAGTAAATTTGGGGTTATTGT        | 48 |
|                |        | Nested reverse  | Bio-CCAATTTTCAACCAACCTATA    |    |
|                |        | Sequencing1 (F) | AGAATAGTAATAATTATAGT         |    |
|                |        | Sequencing2 (F) | TAGTTATTGTAAAAATGAAT         |    |
|                |        | Sequencing3 (F) | TTGTTAAAATTTTTGTTTTT         |    |
|                |        | Sequencing4 (F) | TAGTTGTTAAGTATAATTTA         |    |
| <i>SEMA3C</i>  | Shore  | Forward         | TGTATTTTTAGTAGAGATAGGGTTAG   | 49 |
|                |        | Reverse         | TCTATTAACATAACTCAAACAACC     |    |
|                |        | Nested forward  | TTAGTAGAGATAGGGTTAGG         | 46 |
|                |        | Nested reverse  | Bio-CAAACAACCTCTCCACATAA     |    |
|                |        | Sequencing1 (F) | GATTTTTTGATTTAATGGTT         |    |
|                |        | Sequencing2 (F) | TTAAAATAGGTTAAGATAAA         |    |
|                |        | Sequencing3 (F) | TAATTTTGTTGATTTTTTTA         |    |
|                |        | Sequencing4 (F) | TATTTTTAAATATAATTATA         |    |
| <i>DSCAML1</i> | Shore  | Forward         | TAGATATTGAATAGAATGTTGGAGA    | 49 |
|                |        | Reverse         | ATTATTTCCATTCCCTCAAAATAC     |    |
|                |        | Nested forward  | AGAATGTTGGAGATTTTTTTAATG     | 45 |
|                |        | Nested reverse  | Bio-CCTTTTTTTTATAATACCTAAACT |    |
|                |        | Sequencing1 (F) | AGATTTTTTTAATGTTTTGA         |    |
|                |        | Sequencing2 (F) | GAAGAATTATGAGTTTTTAT         |    |
|                |        | Sequencing3 (F) | GAAAATAGGAATTTTAGTGT         |    |
|                |        | Sequencing4 (F) | AGGTAATATAGATGTTGGTA         |    |
|                |        | Sequencing5 (F) | TAAGGTAGTTATTGGAGATT         |    |
| <i>GPT2</i>    | Shore  | Forward         | ATTGGGGAAGATTTTTATTTAGAG     | 49 |
|                |        | Reverse         | CTAAATCCCAAATTCTCCATATAC     |    |

|                |        |                 |                               |    |
|----------------|--------|-----------------|-------------------------------|----|
|                |        | Nested forward  | AGATTGAATATTTGGTTATTAAG       | 44 |
|                |        | Nested reverse  | Bio-CTCTAAAATCCTTCCCCTTAA     |    |
|                |        | Sequencing1 (F) | ATTTAGTGTAGATAAAGGTG          |    |
|                |        | Sequencing2 (F) | GAGTTTAAATAATTTTTTAG          |    |
|                |        | Sequencing3 (F) | GGAATATTTAAAGATATTTT          |    |
|                |        | Sequencing4 (F) | TAGGTGTTATTTTGATTTTA          |    |
|                |        | Sequencing5 (F) | AAATTTAGTTAAGTAGTGTA          |    |
| <i>ZNF532</i>  | Shore  | Forward         | TTTAGAGTGGAGAAGAAATGTT        | 49 |
|                |        | Reverse         | ATATTCCACATTAACATATACCAC      |    |
|                |        | Nested forward  | GTTTAAATGGGATTAGAGTGATT       | 46 |
|                |        | Nested reverse  | Bio-ATAAAAAACCTTTCAAATTAACAC  |    |
|                |        | Sequencing1 (F) | GTGATTTTATGATGGTATTG          |    |
|                |        | Sequencing2 (F) | GAGTTAGGTTTGGAAGGAAG          |    |
|                |        | Sequencing3 (F) | ATGTGTTGTTTTGTATAAGA          |    |
|                |        | Sequencing4 (F) | AAGGAAGGGTTTTATTAAT           |    |
| <i>DLX5C</i>   | Shore  | Forward         | TATTTAGGGTATTTGGTTTTTTTT      | 48 |
|                |        | Reverse         | AACCTAACTCCCTACCCACTTATCT     |    |
|                |        | Nested forward  | Bio-GGATTGTATTAGAAAAATATAGT   | 43 |
|                |        | Nested reverse  | ACCCATATTTCCCTCCTAT           |    |
|                |        | Sequencing (R)  | CTACAACCTATTTACCC             |    |
| <i>ERICH1</i>  | Shore  | Forward         | TATTTTATTGTGGGAGTTTTTGGAG     | 51 |
|                |        | Reverse         | AATAATCACATTTCTCACTTTTACCACTA |    |
|                |        | Nested forward  | TGGGAGTTTTTGGAGTATAGT         | 42 |
|                |        | Nested reverse  | TATATTTACCTATATTCCTATCT       |    |
|                |        | Sequencing (R)  | AATAAAATACATTTATTATCATT       |    |
| <i>FAM70B</i>  | Island | Forward         | TTTTGTGTTTTGTTGTGGTGTG        | 52 |
|                |        | Reverse         | CTAACTCCAAACTCCAAAACCATTA     |    |
|                |        | Nested forward  | GGAAATGAGATTTATTGAGAG         | 46 |
|                |        | Nested reverse  | Bio-CTCTCCTTCTATTACAACATAA    |    |
|                |        | Sequencing (F)  | TAGTTATTGGTAATTTTTAG          |    |
| <i>SLITRK1</i> | Shore  | Forward         | TTGATTTTIGATTTGTTAGTTGTTTG    | 48 |
|                |        | Reverse         | TATCCAATATATACCCATCACCC       |    |
|                |        | Nested forward  | Bio-GGGGTTTAGGAGTAAAGGTT      | 45 |
|                |        | Nested reverse  | CTACCCTATAAAAAAATCTTAAA       |    |
|                |        | Sequencing (R)  | ATTCCCAAAAATACCCTAAT          |    |
| <i>LRFN5</i>   | Shore  | Forward         | TTGTTGTGGAGGAGTTTGTTAG        | 48 |
|                |        | Reverse         | TCCAACCTACTCCTATAAATC         |    |
|                |        | Nested forward  | TGGTTTGTATGAAAGGGAATAT        | 49 |
|                |        | Nested reverse  | Bio-CCTACTCCTTATAAATCAAAACACC |    |
|                |        | Sequencing (F)  | TTTAGTTGTATTGTTTT             |    |
| <i>FEZF2</i>   | Shore  | Forward         | GTGTGGTTAGAGGTATAAGTAGA       | 50 |
|                |        | Reverse         | TCAACCCTCTCAAACTTATTCCTA      |    |

|                |        |                |                                 |    |    |
|----------------|--------|----------------|---------------------------------|----|----|
|                |        | Nested forward | GTAGAGGGAAGAAAAGATTTTTTTT       |    | 49 |
|                |        | Nested reverse | Bio-CCCAATCCTCCCCCTTTC          |    |    |
|                |        | Sequencing (F) | TTGTAGATTATTTTATTTG             |    |    |
| <i>TMEM14A</i> | Island | Forward        | TGGGTGGGTGTAGATATTTTGTTAT       | 54 |    |
|                |        | Reverse        | ACAATCCTACACACACAAACCTTTA       |    |    |
|                |        | Nested forward | Bio-TAGTGAAAGTTTTGGGAAATTTA     |    | 48 |
|                |        | Nested reverse | CTACACACACAAACCTTTAATAA         |    |    |
|                |        | Sequencing (R) | ATTCATTTTAAAAAATAATCC           |    |    |
| <i>TMEPAI</i>  | Shore  | Forward        | TATTAATTTAAATTGTTTTTAGGAAGGTAAT | 49 |    |
|                |        | Reverse        | AAATTTACATAAAACCACAACAAAC       |    |    |
|                |        | Nested forward | GTTTTTAGGAAGGTAATTAGAA          |    | 45 |
|                |        | Nested reverse | Bio-TACAAAAACTTACCAAATCTATAT    |    |    |
|                |        | Sequencing (F) | AAATTTTAAGAAGTTAGTA             |    |    |
| <i>HOXA3</i>   | Island | Forward        | GATTAATGAGTTATAGAGAGATGTTG      | 48 |    |
|                |        | Reverse        | AAGGAGTTAAAAGTTTTTGGAG          |    |    |
|                |        | Nested forward | GTTTAGGTTTTTTATTTTATAATG        |    | 43 |
|                |        | Nested reverse | TAAGATTTGGTGAGGGTTTGT           |    |    |
|                |        | Sequencing (F) | GGGTGATTTATGAA                  |    |    |

---

Bio = 5' biotin added

F = forward

R = reverse

**Supplementary Table 9. Real time quantitative RT-PCR assays**

| Gene           | Assay ID (Applied Biosystems) |
|----------------|-------------------------------|
| <i>FZD3</i>    | Hs00184043_m1                 |
| <i>RBM38</i>   | Hs00766686_m1                 |
| <i>NDN</i>     | Hs00267349_s1                 |
| <i>TRAF1</i>   | Hs00194638_m1                 |
| <i>ZNF804A</i> | Hs00290118_s1                 |
| <i>CHRM2</i>   | Hs00265208_s1                 |
| <i>NQO1</i>    | Hs00168547_m1                 |
| <i>SEMA3C</i>  | Hs00170762_m1                 |

## Supplementary Methods

**Genomic DNA isolation and McrBC fractionation.** We performed genomic DNA isolation using the MasterPure DNA purification kit (Epicentre) as recommended by the manufacturer. For each sample, 5 µg of gDNA was digested, fractionated, labeled, and hybridized to a CHARM microarray as previously described<sup>1</sup>.

**CHARM microarray design.** CHARM microarrays were prepared as previously described<sup>1</sup> and additionally included a set of 4,500 probes, totaling 148,500 base pairs across 30 genomic regions as controls. Since these control probes represent genomic regions without CpG sites and hence can not be methylated, we used them to normalize and standardize array data. We standardized the observed  $M$  values so that the average in the control regions was 0. Therefore,  $M$  values of 0 for other probes on the array are associated with no methylation.

**Bisulfite pyrosequencing.** Isolation of gDNA for all bisulfite pyrosequencing validation was performed using the MasterPure DNA purification kit (Epicentre) as recommended by the manufacturer. For validation of shore regions, 1 µg of genomic DNA from each sample was bisulfite treated using an EpiTect kit (Qiagen) according to the manufacturer's specifications. Converted gDNA was PCR amplified using unbiased nested primers, and quantitative pyrosequencing performed using a PSQ HS96 (Biotage) to determine percent methylation at each CpG site. Primer sequences and annealing temperatures are provided in Supplementary Table 8. For bisulfite pyrosequencing of C-DMRs in 34-65 colon tumor and 30-61 normal mucosa samples, 500ng of genomic DNA was bisulfite treated using the EZ-96 DNA Methylation Gold kit (Zymo Research) as specified by the manufacturer. Converted gDNA was PCR amplified using unbiased nested primers (Supplementary Table 8) followed by pyrosequencing using a PSQ HS96 (Biotage). Percent methylation at each CpG site was

determined using the Q-CpG methylation software (Biotage). The genomic coordinates for CpG sites measured in colon tumor and normal samples representing DLX5C, ERICH1, FAM70B, SLITRK1, FEZF2, LRFN5, TMEM14A, TMEPAI, and HOXA3 are chr7:96493826,96493847; chr8: 847868,847870; chr13:113615615; chr13:83352935; chr3:62335457,62335482,62335504; chr14:41148241,41148246,41148252; chr6:52638087; chr20:55707264; and chr7:27130446,27130448,27130450, respectively.

**Total RNA isolation.** Total RNA for Affymetrix microarray analysis was isolated from all human tissues using the RNeasy Mini kit (Qiagen) as specified by the manufacturer. All samples were DNase treated using the on-column DNase digestion kit (Qiagen) as recommended. Total RNA concentration was measured and quality determined using an RNA 6000 Nano Lab chip kit and running the chip on a 2100 Bioanalyzer (Agilent).

**Real-time PCR.** Quantitative real time PCR was performed on high quality total RNA samples, determined using Agilent Bioanalyzer and RNA Nano 6000 chips, using pre-optimized Taqman assays (Applied Biosystems). A summary of assay identification numbers can be found in Supplementary Table 9. RNA for quantitative real time PCR was prepared using Trizol (Invitrogen) for *FZD3*, *RBM38*, *NDN*, and *SEMA3C* and the RNeasy mini kit (Qiagen) was used to isolate total RNA for *ZNF804A*, *CHRM2*, and *NQO1*. We prepared complementary DNA, and eliminated genomic DNA, using the QuantiTect RT kit (QIAGEN) with Turbo DNase as recommended by the manufacturer. TaqMan assays (Applied Biosystems) were used to determine relative gene expression and experiments analyzed on a 7900HT detection system. Human *ACTB* was used as an endogenous control. Relative expression differences were calculated using the  $\Delta\Delta C_t$  method<sup>2</sup>.

**Affymetrix Microarray Expression Analysis.** Genome-wide transcriptional analysis was performed on a total of 5 liver and 5 brain samples from the same individuals using Affymetrix U133A GeneChip microarrays. The raw microarray gene expression data for the brain tissue was obtained from The Stanley Medical Research Institute (SMRI) online genomics database [www.stanleygenomics.org](http://www.stanleygenomics.org)<sup>3</sup>. The five individuals selected were unaffected controls from the SMRI Array collection. The microarray expression data for these samples were submitted to the Stanley Medical Research Institute microarray database by Dr. Tadafumi Kato, Dr. Sabine Bahn and Dr. Seth Dobrin. We also carried out genome-wide transcriptional profiling on 4 colon tumor and 4 matched normal mucosa using Affymetrix U133 Plus 2.0 microarrays. One microgram of high-quality total RNA was amplified, labeled, and hybridized according to the manufacturer's (Affymetrix) specifications and as previously described<sup>4,5</sup>.

**5' RACE PCR.** 5' RACE experiments were performed using a 2nd generation RACE kit (Roche Applied Science) as specified by the manufacturer's protocol. RACE PCR products were directly sequenced with 3100 Genetic Analyzer (AB Applied Biosystems). The sequences for our gene specific primers are: PIP5K1A cDNA synthesis (PIP5K1A-Sp1):

TCCTGAGGAATCAACACTTC; first round PIP5K1A primer (PIP5K1A-Sp2):

CAGATGCCATGGGTCTCTTG; second round PIP5K1A primer (PIP5K1A-Sp3):

ACGTCGAGCCGGCTCCTGGA.

**Statistical significance of DMRs.** Contiguous regions composed of probes with z-scores associated with p-values smaller than 0.001 were grouped into regions. The area of each region (length multiplied by  $\Delta M$ ) was used to define statistical significance<sup>6</sup>. We used a permutation test to form a null distribution for these areas and the empirical Bayes approach described<sup>7</sup>. We tested for effects of fragment length on M values observed using CHARM by computing the



expected DNA fragment size based on McrBC recognition sites. Next, we stratified the delta M values for each probe, from the colon tumor and normal mucosa comparison, by fragment size. The results are in Supplementary Fig. 9, and shows no relationship between fragment size and  $\Delta M$ .

**GO Annotation.** GO annotation was analyzed using the Bioconductor <sup>8</sup> Gostats package <sup>9</sup> to find enriched categories ( $P < 0.01$ )

## References

1. Irizarry, R.A. et al. Comprehensive high-throughput arrays for relative methylation (CHARM). *Genome Res* (2008).
2. Livak, K.J. & Schmittgen, T.D. Analysis of relative gene expression data using real-time quantitative PCR and the 2(-Delta Delta C(T)) Method. *Methods* **25**, 402-8 (2001).
3. Higgs, B.W. et al. An online database for brain disease research. *BMC Genomics*. **7**, 70 (2006).
4. Irizarry, R.A. et al. Exploration, normalization, and summaries of high density oligonucleotide array probe level data. *Biostatistics* **4**, 249-64 (2003).
5. Bolstad, B.M., Irizarry, R.A., Astrand, M. & Speed, T.P. A comparison of normalization methods for high density oligonucleotide array data based on variance and bias. *Bioinformatics* **19**, 185-93 (2003).
6. Bullmore, E.T. et al. Global, voxel, and cluster tests, by theory and permutation, for a difference between two groups of structural MR images of the brain. *IEEE Trans Med Imaging* **18**, 32-42 (1999).

7. Efron, B., Tibshirani, R., Storey, J.D. & Tusher, V. Empirical Bayes analysis of a microarray experiment. *J Am Stat Assoc* **96**, 1151-1160 (2001).
8. Gentleman, R.C. et al. Bioconductor: open software development for computational biology and bioinformatics. *Genome Biol* **5**, R80 (2004).
9. Falcon, S. & Gentleman, R. Using GOstats to test gene lists for GO term association. *Bioinformatics* **23**, 257-8 (2007).
